# Supplementary material for: Genetic and chemical validation of Plasmodium falciparum aminopeptidase PfA-M17 as a drug target in the hemoglobin digestion pathway
Source: PubMed Central journal article supplement (PMC9470162; doi:10.7554/elife.80813), 2022-09-13

Kb  
2 -  
1.5 -  
1 -

3D7 WT

M17-HAglimS

3D7 WT

M17-HAglimS

DO733 +  
DO276

DO733 +  
DO734

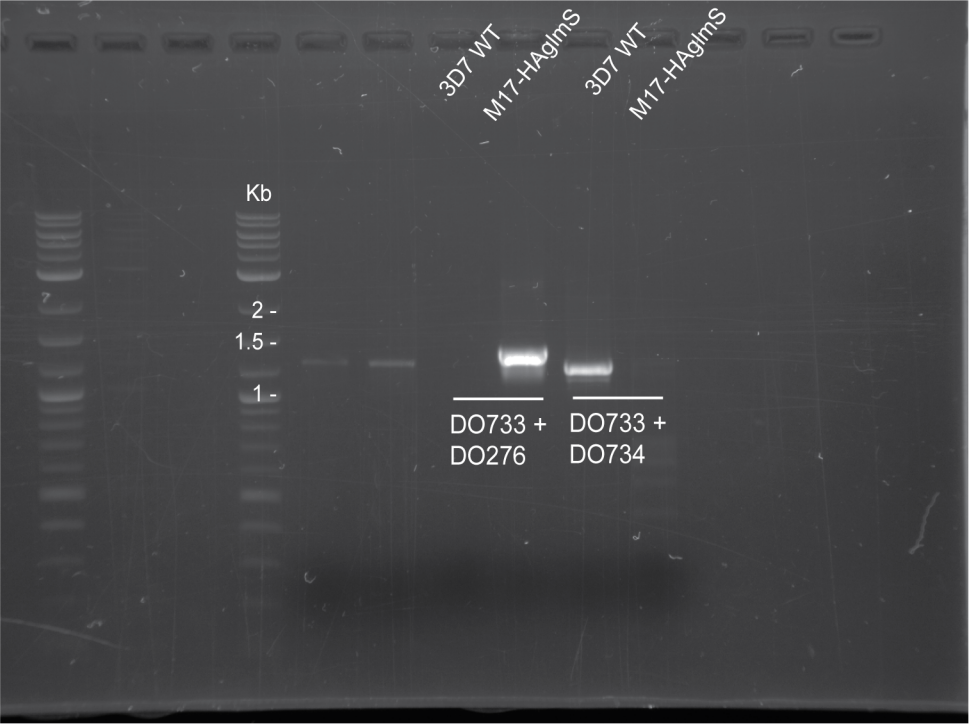

Supplement: elife-80813-fig1-data2.pdf [file elife-80813-fig1-data2.pdf]
