# Supplementary material for: Genetic and chemical validation of Plasmodium falciparum aminopeptidase PfA-M17 as a drug target in the hemoglobin digestion pathway
Source: PubMed Central journal article supplement (PMC9470162; doi:10.7554/elife.80813), 2022-09-13
Supplement: elife-80813-fig1-data3.pdf [file elife-80813-fig1-data3.pdf]

10 9 8 7 6 5 4 3 2 1

11  
21  
31  
41  
51  
61  
71  
81

1  
2  
3  
4  
5
