# Supplementary material for: Genetic and chemical validation of Plasmodium falciparum aminopeptidase PfA-M17 as a drug target in the hemoglobin digestion pathway
Source: PubMed Central journal article supplement (PMC9470162; doi:10.7554/elife.80813), 2022-09-13
Supplement: elife-80813-fig1-data4.pdf [file elife-80813-fig1-data4.pdf]

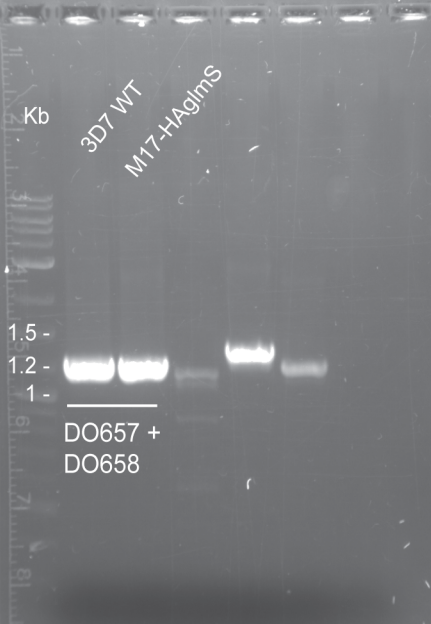

Kb

3D7 WT

M17-HAglmsS

1.5 -  
1.2 -  
1 -

DO657 +  
DO658
