# Supplementary material for: Genetic and chemical validation of Plasmodium falciparum aminopeptidase PfA-M17 as a drug target in the hemoglobin digestion pathway
Source: PubMed Central journal article supplement (PMC9470162; doi:10.7554/elife.80813), 2022-09-13

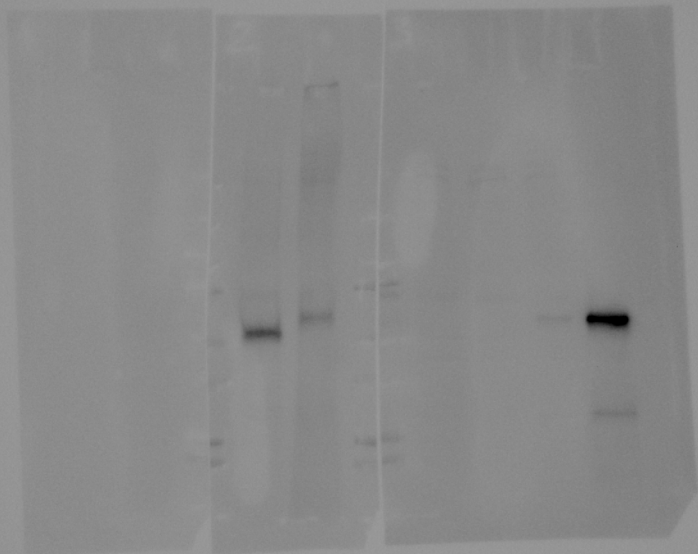

Supplement: elife-80813-fig1-figsupp1-data1.pdf [file elife-80813-fig1-figsupp1-data1.pdf]
