# Supplementary material for: Genetic and chemical validation of Plasmodium falciparum aminopeptidase PfA-M17 as a drug target in the hemoglobin digestion pathway
Source: PubMed Central journal article supplement (PMC9470162; doi:10.7554/elife.80813), 2022-09-13
Supplement: elife-80813-fig2-data2.pdf [file elife-80813-fig2-data2.pdf]

Starting material  
Hypotonic  
 $\text{Na}_2\text{CO}_3$   
TX-100  
Insoluble

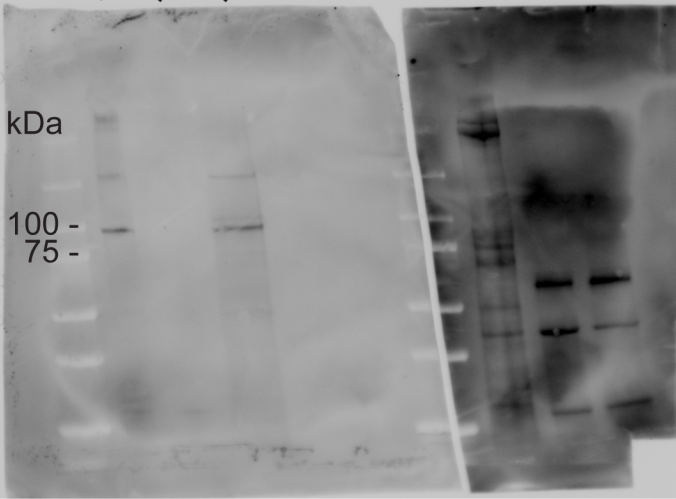

$\alpha$ -HSP101
