# Supplementary material for: Genetic and chemical validation of Plasmodium falciparum aminopeptidase PfA-M17 as a drug target in the hemoglobin digestion pathway
Source: PubMed Central journal article supplement (PMC9470162; doi:10.7554/elife.80813), 2022-09-13

kDa

Saponin

Hypotonic

Na<sup>2</sup>CO<sub>3</sub>

TX-100

Insoluble

37 -

25 -

α-GAPDH

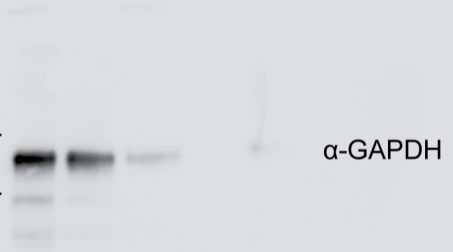

Supplement: elife-80813-fig2-data4.pdf [file elife-80813-fig2-data4.pdf]
