# Supplementary material for: Genetic and chemical validation of Plasmodium falciparum aminopeptidase PfA-M17 as a drug target in the hemoglobin digestion pathway
Source: eLife. 2022 Sep 13;11:e80813. doi: 10.7554/eLife.80813 (PMC9470162; doi:10.7554/eLife.80813)
Supplement: Source data 1. [file elife-80813-data1.xlsx]

## Sheet: Fig3A
	Densitometry of protein knockdown
	EXP2				HA(M17)
N	1	2	3		1	2	3
Cycle 1	1.074	0.618	1.4		0.12596	0.115572	0.248954
Cycle 2	0.409941	0.467393	0.543849		0.031874	0.044116	0.029428
	Normalized to EXP2 expression
	100	100	100		11.7334	18.6989	17.8267
	100	100	100		7.77532	9.43881	5.41101

## Sheet: Fig3D
	Percent Parasitemia
	M17-HAglmS				M17-HAglmS + GlcN
Hour post invasion	1	2	3		1	2	3	N
4	1	0.9	0.7		0.7	1	0.9
28	0.8	0.9	1		0.9	0.9	0.9
52	4.9	4.3	4.4		3.5	2.5	2.4
76	5.2	5.8	5.4		2.9	4.7	3.9
100	11.2	9.2	12.8		2.6	2.8	3.9
119	19.2	14.6	17		3.2	3	3

## Sheet: Fig3E
	Ratio parasite survival after 10 days (Sybr Green)
	M17-HAglmS				M17-HAglmS + GlcN
N	1	2	3		1	2	3
	Normalized to untreated
	1.33	1.12	0.55		0.06	0.06	0

## Sheet: Fig4C
		Percent survival (3D7)
log (3), nM	N	1	2	3	4
14496		3.59789	5.20947	7.94066	2.38191
7248		7.64262	12.0115	0	3.45455
3624		14.1253	22.0456	2.97321	3.62637
1812		21.2965	35.9993	11.1739	5.48984
906		32.0292	57.1853	17.3757	17.05
453		42.4382	80.3909	34.0186	32.315
226.5		62.7974	108.172	67.3061	54.5171
113.25		82.3831	130.661	78.517	79.1483
56.625		94.4543	139.076	79.2816	93.9701
28.3125		107.566	146.328	76.2108	111.199
14.1562		111.68	150.291	81.3897	115.439

## Sheet: Fig4D
	Percent survival (normalized to DMSO-treated)
N	ART R 24h	ART R 48h	ART T 24h	ART T 48h	3 R 24h	3 R 48h	3 T 24h	3 T 48h
1	1.47	0.522	4.98	2.12	22.7	3.02	14.3	5.12
2	1.38	2.39	4.72	2.1	29.1	6.12	11.1	4.58
3	1.14	0	2.12	0.0811	28.3	5.18	15.2	1.8
4	0.213	2.02	1.55	0.68	19.6	9.92	7.55	2.91
	(ART=Artesunate)
	(R=Ring)
	(T=Troph)

## Sheet: Fig5A
	Percent survival (normalized to DMSO-treated)
	+GlcN			+GlcN +5xEC50 MIPS2571			+GlcN +10xEC50 MIPS2571			+5xEC50 MIPS2571
Hours post invasion	1	2	3	1	2	3	1	2	3	1	2	N
48	82.6529	107.982	74.0533	100.392	118.52	77.1612	104.144	85.9263	91.3093	118.48	98.2
63	77.7005	106.405	69.9707	86.4545	101.079	70.7466	84.1929	87.7203	78.0009	103.38	94.23
70	66.5675	112.605	62.3305	79.0879	109.498	59.1082	79.1781	103.356	70.0961	89	85.13
74	50.4291	82.8636	46.8337	53.5018	78.7975	42.1759	53.7775	84.097	45.0641	79.2	82.9
87.5	10.4227	24.2569	14.2575	8.83809	24.4762	12.6612	9.65425	25.961	11.4512	23.12	21.64
94	20.8125	18.8089	12.3286	16.1806	15.5558	9.51838	16.0018	14.6056	10.0489	19.08	20.17
113	32.0221	24.7651	21.0326	13.1773	10.8503	8.73155	11.4313	9.43898	8.89308	20.89	22.89

## Sheet: Fig6
PG.ProteinAccessions	PG.FASTAHeader	Peptide count Compound 3 12 µM - Rep #1	Peptide count Compound 3 12 µM - Rep #2	Peptide count Compound 3 12 µM - Rep #3	Peptide count Compound 3 12 µM - Rep #4	Peptide count Compound 3 3 µM - Rep #1	Peptide count Compound 3 3 µM - Rep #2	Peptide count Compound 3 3 µM - Rep #3	Peptide count Compound 3 3 µM - Rep #4	Peptide count DMSO - Rep #1	Peptide count DMSO - Rep #2	Peptide count DMSO - Rep #3	Peptide count DMSO - Rep #4	peptide count	Protein intensity Compound 3 12 µM - Rep #1	Protein intensity Compound 3 12 µM - Rep #2	Protein intensity Compound 3 12 µM - Rep #3	Protein intensity Compound 3 12 µM - Rep #4	Protein intensity Compound 3 3 µM - Rep #1	Protein intensity Compound 3 3 µM - Rep #2	Protein intensity Compound 3 3 µM - Rep #3	Protein intensity Compound 3 3 µM - Rep #4	Protein intensity DMSO - Rep #1	Protein intensity DMSO - Rep #2	Protein intensity DMSO - Rep #3	Protein intensity DMSO - Rep #4		Average intensity Compound 3 12 µM	Average intensity Compound 3 3 µM	Average intensity DMSO	sum of average intensity		Fold change - Compound 3 12 µM versus DMSO	Fold change - Compound 3 3 µM versus DMSO		P-value - Compound 3 12 µM versus DMSO	P-value - Compound 3 3 µM versus DMSO
transcript=PF3D7_1446200.1	>PF3D7_1446200.1-p1 | transcript=PF3D7_1446200.1 | gene=PF3D7_1446200 | organism=Plasmodium_falciparum_3D7 | gene_product=M17 leucyl aminopeptidase | transcript_product=M17 leucyl aminopeptidase | location=Pf3D7_14_v3:1893200-1895017(-) | protein_length=605 | sequence_SO=chromosome | SO=protein_coding | is_pseudo=false	37	37	37	37	37	37	37	37	37	37	37	37	444	1.41336e+06	1.48119e+06	1.50349e+06	1.60588e+06	1.36078e+06	1376552	1.37624e+06	1.38212e+06	1.25929e+06	1.19431e+06	1.25205e+06	1.07397e+06		1.50098e+06	1.37392e+06	1.1949e+06	4.06981e+06		1.25615	1.14982		0.00199021	0.0242679
A0A075B7B1;H0YL34	>tr|A0A075B7B1|A0A075B7B1_HUMAN Desmuslin, isoform CRA_a OS=Homo sapiens GN=SYNM PE=1 SV=1;>tr|H0YL34|H0YL34_HUMAN Synemin OS=Homo sapiens GN=SYNM PE=1 SV=1	2	2	2	2	2	2	2	2	2	2	2	2	24	72164.5	66730.8	106159	74127	98086.7	26539.6	22808.1	13693.3	99636.1	93629.6	54038.5	21354.7		79795.4	40281.9	67164.7	187242		1.18806	0.599748		0.566334	0.353359
A0A075B7C0;A0A0C4DGQ5;K7EIV0;K7ELJ7;K7EM73;P04632;U3KQE2	>tr|A0A075B7C0|A0A075B7C0_HUMAN Calpain small subunit 1 (Fragment) OS=Homo sapiens GN=CAPNS1 PE=1 SV=1;>tr|A0A0C4DGQ5|A0A0C4DGQ5_HUMAN Calpain small subunit 1 OS=Homo sapiens GN=CAPNS1 PE=1 SV=1;>tr|K7EIV0|K7EIV0_HUMAN Calpain small subunit 1 (Fragment) OS=Homo sapiens GN=CAPNS1 PE=1 SV=2;>tr|K7ELJ7|K7ELJ7_HUMAN Calpain small subunit 1 OS=Homo sapiens GN=CAPNS1 PE=1 SV=1;>tr|K7EM73|K7EM73_HUMAN C…	1	1	1	1	1	1	1	1	1	1	1	1	12	37282.2	34531.4	41092.9	48612.7	40418	40898.4	35814.6	39246	45700.3	40956	41012.6	38995.5		40379.8	39094.2	41666.1	121140		0.969128	0.938274		0.721176	0.211353
transcript=PF3D7_1311800.1	>PF3D7_1311800.1-p1 | transcript=PF3D7_1311800.1 | gene=PF3D7_1311800 | organism=Plasmodium_falciparum_3D7 | gene_product=M1-family alanyl aminopeptidase | transcript_product=M1-family alanyl aminopeptidase | location=Pf3D7_13_v3:501790-505047(+) | protein_length=1085 | sequence_SO=chromosome | SO=protein_coding | is_pseudo=false	90	90	90	90	90	90	90	90	90	90	90	90	1080	13291976	16850652	14606644	14173807	12403781	13348500	13456580	13561667	13417782	11841589	14601823	12496605		1.47308e+07	13192632	1.30894e+07	4.10129e+07		1.12539	1.00788		0.142788	0.882296
A0A087WT99;A0A1W2PRB8;E9PJU8;E9PQS1;Q9H0W9	>tr|A0A087WT99|A0A087WT99_HUMAN Ester hydrolase C11orf54 OS=Homo sapiens GN=C11orf54 PE=1 SV=1;>tr|A0A1W2PRB8|A0A1W2PRB8_HUMAN Uncharacterized protein OS=Homo sapiens PE=4 SV=1;>tr|E9PJU8|E9PJU8_HUMAN Ester hydrolase C11orf54 (Fragment) OS=Homo sapiens GN=C11orf54 PE=1 SV=1;>tr|E9PQS1|E9PQS1_HUMAN Ester hydrolase C11orf54 (Fragment) OS=Homo sapiens GN=C11orf54 PE=1 SV=1;>sp|Q9H0W9|CK054_HUMAN Est…	1	1	1	1	1	1	1	1	1	1	1	1	12	25740.2	90423.8	82663.1	14267.7	21300.4	16349.7	108981	27750.2	21145.1	22763.8	21874.9	27547.9		53273.7	43595.3	23332.9	120202		2.2832	1.8684		0.220712	0.423823
A0A024RA52;P25787	>tr|A0A024RA52|A0A024RA52_HUMAN Proteasome subunit alpha type OS=Homo sapiens GN=PSMA2 PE=1 SV=1;>sp|P25787|PSA2_HUMAN Proteasome subunit alpha type-2 OS=Homo sapiens GN=PSMA2 PE=1 SV=2	7	7	7	7	7	7	7	7	7	7	7	7	84	101185	70338.3	112460	109212	106676	106726	113384	102516	85930.8	108240	95186.4	101642		98298.8	107326	97749.8	303374		1.00562	1.09796		0.961432	0.138173
A0A087WSW9;A0A087WSY9;A0A182DWI3;E9PIR7;F8W809;Q16881	>tr|A0A087WSW9|A0A087WSW9_HUMAN Thioredoxin reductase 1, cytoplasmic OS=Homo sapiens GN=TXNRD1 PE=1 SV=1;>tr|A0A087WSY9|A0A087WSY9_HUMAN Thioredoxin reductase 1, cytoplasmic OS=Homo sapiens GN=TXNRD1 PE=1 SV=2;>tr|A0A182DWI3|A0A182DWI3_HUMAN Thioredoxin reductase 1, cytoplasmic OS=Homo sapiens GN=TXNRD1 PE=1 SV=1;>tr|E9PIR7|E9PIR7_HUMAN Thioredoxin reductase 1, cytoplasmic OS=Homo sapiens GN=TXNR…	6	6	6	6	6	6	6	6	6	6	6	6	72	148505	155474	159256	196528	175699	115459	151703	172548	171705	152000	182091	136741		164941	153852	160635	479427		1.02681	0.957778		0.780511	0.707574
A0A087WUL2;P49720	>tr|A0A087WUL2|A0A087WUL2_HUMAN Proteasome subunit beta type-3 (Fragment) OS=Homo sapiens GN=PSMB3 PE=1 SV=1;>sp|P49720|PSB3_HUMAN Proteasome subunit beta type-3 OS=Homo sapiens GN=PSMB3 PE=1 SV=2	2	2	2	2	2	2	2	2	2	2	2	2	24	188652	136983	209229	185853	217137	246805	235458	196228	88786.6	146059	219796	270212		180179	223907	181213	585299		0.994294	1.2356		0.98193	0.370019
A0A087WUQ6;P07203	>tr|A0A087WUQ6|A0A087WUQ6_HUMAN Glutathione peroxidase OS=Homo sapiens GN=GPX1 PE=1 SV=1;>sp|P07203|GPX1_HUMAN Glutathione peroxidase 1 OS=Homo sapiens GN=GPX1 PE=1 SV=4	9	9	9	9	9	9	9	9	9	9	9	9	108	954436	1131011	1.00116e+06	1318931	1.14201e+06	1.04134e+06	1.10805e+06	1.13201e+06	1.17863e+06	1.1234e+06	1.08991e+06	1.20715e+06		1.10138e+06	1.10585e+06	1.14977e+06	3.35701e+06		0.957914	0.9618		0.605639	0.25525
A0A087WW66;Q99460	>tr|A0A087WW66|A0A087WW66_HUMAN 26S proteasome non-ATPase regulatory subunit 1 OS=Homo sapiens GN=PSMD1 PE=1 SV=1;>sp|Q99460|PSMD1_HUMAN 26S proteasome non-ATPase regulatory subunit 1 OS=Homo sapiens GN=PSMD1 PE=1 SV=2	15	15	15	15	15	15	15	15	15	15	15	15	180	86789.4	100273	73339.2	42136.4	69820.3	104898	103628	69954.5	96653.8	89037	88161.9	105056		75634.4	87075.2	94727.2	257437		0.798444	0.919221		0.225091	0.514003
A0A087WWM4;F8WAN9;H0YKE1;H0YLB8;H0YLV5;H0YMB3;H0YNJ6;H0YNS9;Q9P2T1	>tr|A0A087WWM4|A0A087WWM4_HUMAN GMP reductase OS=Homo sapiens GN=GMPR2 PE=1 SV=1;>tr|F8WAN9|F8WAN9_HUMAN GMP reductase OS=Homo sapiens GN=GMPR2 PE=1 SV=1;>tr|H0YKE1|H0YKE1_HUMAN GMP reductase 2 (Fragment) OS=Homo sapiens GN=GMPR2 PE=1 SV=1;>tr|H0YLB8|H0YLB8_HUMAN GMP reductase 2 (Fragment) OS=Homo sapiens GN=GMPR2 PE=1 SV=1;>tr|H0YLV5|H0YLV5_HUMAN GMP reductase OS=Homo sapiens GN=GMPR2 PE=1 SV=1;…	1	1	1	1	1	1	1	1	1	1	1	1	12	14434.9	13221.3	17894.5	17367.3	14454.7	13014.2	15672.9	11226.1	14033.3	17790.1	16266.3	14133.5		15729.5	13592	15555.8	44877.3		1.01117	0.873757		0.908633	0.186948
A0A087WY55;Q9NP79	>tr|A0A087WY55|A0A087WY55_HUMAN Chromosome 6 open reading frame 55, isoform CRA_b OS=Homo sapiens GN=VTA1 PE=1 SV=1;>sp|Q9NP79|VTA1_HUMAN Vacuolar protein sorting-associated protein VTA1 homolog OS=Homo sapiens GN=VTA1 PE=1 SV=1	2	2	2	2	2	2	2	2	2	2	2	2	24	52679.2	69349.2	66844.3	73983.3	63204.5	79576.3	82398	131993	108739	76642	122079	124237		65714	89293	107924	262931		0.608891	0.827368		0.0236658	0.35511
A0A087WZ70;Q9BXD5	>tr|A0A087WZ70|A0A087WZ70_HUMAN N-acetylneuraminate lyase OS=Homo sapiens GN=NPL PE=1 SV=1;>sp|Q9BXD5|NPL_HUMAN N-acetylneuraminate lyase OS=Homo sapiens GN=NPL PE=1 SV=1	1	1	1	1	1	1	1	1	1	1	1	1	12	2645.97	27936.2	3319.85	24538	12385.2	3813.85	4518.68	16135.4	13869.5	13692.8	12719.2	18069.1		14610	9213.27	14587.6	38410.9		1.00153	0.63158		0.997592	0.174338
A0A087WZZ4;A0A0A0MQS8;Q02094	>tr|A0A087WZZ4|A0A087WZZ4_HUMAN Ammonium transporter Rh type A OS=Homo sapiens GN=RHAG PE=3 SV=1;>tr|A0A0A0MQS8|A0A0A0MQS8_HUMAN Ammonium transporter Rh type A OS=Homo sapiens GN=RHAG PE=3 SV=1;>sp|Q02094|RHAG_HUMAN Ammonium transporter Rh type A OS=Homo sapiens GN=RHAG PE=1 SV=2	1	1	1	1	1	1	1	1	1	1	1	1	12	83328.7	74032.9	89968.4	42928.2	91636.9	87285.1	93150.2	88288.1	58096.8	80176.2	86358.7	111912		72564.6	90090.1	84136	246791		0.862467	1.07077		0.475208	0.629478
A0A087WVQ6;Q00610	>tr|A0A087WVQ6|A0A087WVQ6_HUMAN Clathrin heavy chain OS=Homo sapiens GN=CLTC PE=1 SV=1;>sp|Q00610|CLH1_HUMAN Clathrin heavy chain 1 OS=Homo sapiens GN=CLTC PE=1 SV=5	28	28	28	28	28	28	28	28	28	28	28	28	336	133575	127426	113535	84731.3	136458	146666	148508	144737	112387	114688	147928	150711		114817	144092	131428	390337		0.873607	1.09635		0.310977	0.312503
A0A087X2I1;P62333	>tr|A0A087X2I1|A0A087X2I1_HUMAN 26S proteasome regulatory subunit 10B OS=Homo sapiens GN=PSMC6 PE=1 SV=1;>sp|P62333|PRS10_HUMAN 26S proteasome regulatory subunit 10B OS=Homo sapiens GN=PSMC6 PE=1 SV=1	12	12	12	12	12	12	12	12	12	12	12	12	144	72249.8	93300.4	45660	21091.9	59441.9	98129.7	57904.4	78430.2	71009.4	60764.1	68367.3	59847.8		58075.5	73476.6	64997.1	196549		0.893509	1.13046		0.692169	0.444018
A0A087WVQ9;P68104;Q05639;Q5VTE0	>tr|A0A087WVQ9|A0A087WVQ9_HUMAN Elongation factor 1-alpha 1 OS=Homo sapiens GN=EEF1A1 PE=1 SV=1;>sp|P68104|EF1A1_HUMAN Elongation factor 1-alpha 1 OS=Homo sapiens GN=EEF1A1 PE=1 SV=1;>sp|Q05639|EF1A2_HUMAN Elongation factor 1-alpha 2 OS=Homo sapiens GN=EEF1A2 PE=1 SV=1;>sp|Q5VTE0|EF1A3_HUMAN Putative elongation factor 1-alpha-like 3 OS=Homo sapiens GN=EEF1A1P5 PE=5 SV=1	2	2	2	2	2	2	2	2	2	2	2	2	24	218523	324876	284139	190774	262701	190310	233503	264902	238109	196635	191656	144843		254578	237854	192811	685243		1.32035	1.23361		0.146512	0.132055
A0A087X1Z3;Q9UL46	>tr|A0A087X1Z3|A0A087X1Z3_HUMAN Proteasome activator complex subunit 2 OS=Homo sapiens GN=PSME2 PE=1 SV=1;>sp|Q9UL46|PSME2_HUMAN Proteasome activator complex subunit 2 OS=Homo sapiens GN=PSME2 PE=1 SV=4	11	11	11	11	11	11	11	11	11	11	11	11	132	102909	88707.6	100033	102197	76990.5	98845	92115.7	117967	110973	99317.7	121498	106560		98461.5	96479.6	109587	304528		0.898475	0.88039		0.10387	0.23789
A0A0A0MRJ6;F6S8N6;H7BY58;P22061	>tr|A0A0A0MRJ6|A0A0A0MRJ6_HUMAN Protein-L-isoaspartate O-methyltransferase OS=Homo sapiens GN=PCMT1 PE=1 SV=1;>tr|F6S8N6|F6S8N6_HUMAN Protein-L-isoaspartate(D-aspartate) O-methyltransferase OS=Homo sapiens GN=PCMT1 PE=1 SV=1;>tr|H7BY58|H7BY58_HUMAN Protein-L-isoaspartate O-methyltransferase OS=Homo sapiens GN=PCMT1 PE=1 SV=1;>sp|P22061|PIMT_HUMAN Protein-L-isoaspartate(D-aspartate) O-methyltransf…	2	2	2	2	2	2	2	2	2	2	2	2	24	38708.6	39185.9	25989.6	35581.1	32579.8	31936	27470.7	31943	52595	46793.8	35829.1	32405.7		34866.3	30982.4	41905.9	107755		0.832014	0.739332		0.263599	0.0996973
A0A0A0MS58;Q8TCA0;X6RK58	>tr|A0A0A0MS58|A0A0A0MS58_HUMAN Leucine rich repeat containing 20, isoform CRA_e OS=Homo sapiens GN=LRRC20 PE=1 SV=1;>sp|Q8TCA0|LRC20_HUMAN Leucine-rich repeat-containing protein 20 OS=Homo sapiens GN=LRRC20 PE=1 SV=1;>tr|X6RK58|X6RK58_HUMAN Leucine-rich repeat-containing protein 20 (Fragment) OS=Homo sapiens GN=LRRC20 PE=1 SV=7	1	1	1	1	1	1	1	1	1	1	1	1	12	2.41109e+06	1.49692e+06	1.48212e+06	2.3776e+06	2.99841e+06	2564502	2.4807e+06	2.71048e+06	2087881	2633145	2731601	3719571		1.94193e+06	2.68852e+06	2.79305e+06	7.4235e+06		0.695273	0.962576		0.0974106	0.78623
A0A0A0MSJ3;E9PFK9;Q3HKR1;Q9UJ41	>tr|A0A0A0MSJ3|A0A0A0MSJ3_HUMAN RAB guanine nucleotide exchange factor (GEF) 1, isoform CRA_c OS=Homo sapiens GN=RABGEF1 PE=1 SV=1;>tr|E9PFK9|E9PFK9_HUMAN Rab5 GDP/GTP exchange factor OS=Homo sapiens GN=RABGEF1 PE=1 SV=1;>tr|Q3HKR1|Q3HKR1_HUMAN RAP1 short isoform OS=Homo sapiens GN=RABGEF1 PE=1 SV=1;>sp|Q9UJ41|RABX5_HUMAN Rab5 GDP/GTP exchange factor OS=Homo sapiens GN=RABGEF1 PE=1 SV=2	1	1	1	1	1	1	1	1	1	1	1	1	12	687733	923275	723376	866404	719882	752031	728602	818211	957377	753736	823805	759313		800197	754682	823558	2.37844e+06		0.971634	0.916368		0.761981	0.254341
A0A0B4J296;B8ZZU8;I3L0M9;Q15370	>tr|A0A0B4J296|A0A0B4J296_HUMAN Elongin-B OS=Homo sapiens GN=ELOB PE=1 SV=1;>tr|B8ZZU8|B8ZZU8_HUMAN Elongin-B OS=Homo sapiens GN=ELOB PE=1 SV=1;>tr|I3L0M9|I3L0M9_HUMAN Elongin-B (Fragment) OS=Homo sapiens GN=ELOB PE=1 SV=1;>sp|Q15370|ELOB_HUMAN Elongin-B OS=Homo sapiens GN=ELOB PE=1 SV=1	1	1	1	1	1	1	1	1	1	1	1	1	12	630127	713087	438648	607984	593360	503618	502892	571224	549777	611536	555507	473683		597461	542774	547626	1.68786e+06		1.091	0.99114		0.477169	0.899138
A0A0C4DG71;A0A0G2JQM2;A0A0G2JR20;A0A0G2JR50;Q86SQ7	>tr|A0A0C4DG71|A0A0C4DG71_HUMAN Serologically defined colon cancer antigen 8 (Fragment) OS=Homo sapiens GN=SDCCAG8 PE=1 SV=1;>tr|A0A0G2JQM2|A0A0G2JQM2_HUMAN Serologically defined colon cancer antigen 8 OS=Homo sapiens GN=SDCCAG8 PE=1 SV=1;>tr|A0A0G2JR20|A0A0G2JR20_HUMAN Serologically defined colon cancer antigen 8 (Fragment) OS=Homo sapiens GN=SDCCAG8 PE=1 SV=1;>tr|A0A0G2JR50|A0A0G2JR50_HUMAN Ser…	1	1	1	1	1	1	1	1	1	1	1	1	12	1.89635e+06	1.77264e+06	1.88837e+06	1.47272e+06	2.01927e+06	2110109	2.20878e+06	1.85557e+06	1735068	1.96164e+06	2.28809e+06	2.28263e+06		1.75752e+06	2.04843e+06	2.06686e+06	5.87281e+06		0.850335	0.991087		0.117586	0.909658
A0A0A0MR45;A0A0C4DGB5;B7Z574;E7EQ12;E7EQA0;E7ES10;E7EVY3;E9PCH5;E9PDE4;H0Y7F0;H0Y9H6;H0YD33;P20810	>tr|A0A0A0MR45|A0A0A0MR45_HUMAN Calpastatin OS=Homo sapiens GN=CAST PE=1 SV=1;>tr|A0A0C4DGB5|A0A0C4DGB5_HUMAN Calpastatin OS=Homo sapiens GN=CAST PE=1 SV=1;>tr|B7Z574|B7Z574_HUMAN Calpastatin OS=Homo sapiens GN=CAST PE=1 SV=1;>tr|E7EQ12|E7EQ12_HUMAN Calpastatin OS=Homo sapiens GN=CAST PE=1 SV=1;>tr|E7EQA0|E7EQA0_HUMAN Calpastatin OS=Homo sapiens GN=CAST PE=1 SV=1;>tr|E7ES10|E7ES10_HUMAN Calpastat…	4	4	4	4	4	4	4	4	4	4	4	4	48	280210	352586	275867	350630	304885	270595	279520	274157	348082	339980	316297	282501		314823	282289	321715	918828		0.978578	0.877451		0.799784	0.0689403
A0A0J9YYC8;A6XMV8;A6XMV9;E7EQ64;H0Y8D1;P07477;P07478;Q8NHM4	>tr|A0A0J9YYC8|A0A0J9YYC8_HUMAN Trypsin-2 OS=Homo sapiens GN=PRSS2 PE=1 SV=1;>tr|A6XMV8|A6XMV8_HUMAN Protease serine 2 preproprotein OS=Homo sapiens GN=PRSS2 PE=1 SV=1;>tr|A6XMV9|A6XMV9_HUMAN Protease serine 2 preproprotein OS=Homo sapiens GN=PRSS2 PE=1 SV=1;>tr|E7EQ64|E7EQ64_HUMAN Trypsin-1 OS=Homo sapiens GN=PRSS1 PE=1 SV=1;>tr|H0Y8D1|H0Y8D1_HUMAN Trypsin-1 (Fragment) OS=Homo sapiens GN=PRSS1 P…	1	1	1	1	1	1	1	1	1	1	1	1	12	42664.8	41875	48178.1	85474.4	49104.7	39302.1	52574.5	58600.7	83972.3	48924.6	514614	49842		54548.1	49895.5	174338	278782		0.312886	0.286199		0.370079	0.353891
A0A0A0MRA3;A0A0A0MTS7;Q8WZ42	>tr|A0A0A0MRA3|A0A0A0MRA3_HUMAN Titin OS=Homo sapiens GN=TTN PE=1 SV=1;>tr|A0A0A0MTS7|A0A0A0MTS7_HUMAN Titin OS=Homo sapiens GN=TTN PE=1 SV=1;>sp|Q8WZ42|TITIN_HUMAN Titin OS=Homo sapiens GN=TTN PE=1 SV=4	2	2	2	2	2	2	2	2	2	2	2	2	24	98847768	130761136	109835224	136063008	125229904	101812528	102903424	122836744	152574464	106691656	110500104	125905112		118876784	113195650	123917834	355990268		0.959319	0.913473		0.7241	0.418943
A0A1B0GWG0	>tr|A0A1B0GWG0|A0A1B0GWG0_HUMAN Protein 4.1 (Fragment) OS=Homo sapiens GN=EPB41 PE=1 SV=1	3	3	3	3	3	3	3	3	3	3	3	3	36	37104.4	32515.2	33640.4	28170.1	31716.1	25906	25430.3	41024.8	38862.3	39027.8	37559.6	17792.7		32857.5	31019.3	33310.6	97187.4		0.986399	0.931214		0.938569	0.731053
A0A0G2JIW1;P0DMV8;P0DMV9	>tr|A0A0G2JIW1|A0A0G2JIW1_HUMAN Heat shock 70 kDa protein 1B OS=Homo sapiens GN=HSPA1B PE=1 SV=1;>sp|P0DMV8|HS71A_HUMAN Heat shock 70 kDa protein 1A OS=Homo sapiens GN=HSPA1A PE=1 SV=1;>sp|P0DMV9|HS71B_HUMAN Heat shock 70 kDa protein 1B OS=Homo sapiens GN=HSPA1B PE=1 SV=1	31	31	31	31	31	31	31	31	31	31	31	31	372	2.19488e+06	1.80002e+06	1738691	1.27893e+06	1.89779e+06	1.85832e+06	1.95898e+06	1.83804e+06	1.76918e+06	1.83456e+06	1.93178e+06	1.68245e+06		1.75313e+06	1.88828e+06	1.80449e+06	5.44591e+06		0.971538	1.04643		0.80701	0.221718
A6NHG4;B5MC82;J3KQ18;P30046	>sp|A6NHG4|DDTL_HUMAN D-dopachrome decarboxylase-like protein OS=Homo sapiens GN=DDTL PE=2 SV=1;>tr|B5MC82|B5MC82_HUMAN D-dopachrome decarboxylase OS=Homo sapiens GN=DDT PE=4 SV=2;>tr|J3KQ18|J3KQ18_HUMAN D-dopachrome decarboxylase OS=Homo sapiens GN=DDT PE=1 SV=1;>sp|P30046|DOPD_HUMAN D-dopachrome decarboxylase OS=Homo sapiens GN=DDT PE=1 SV=3	1	1	1	1	1	1	1	1	1	1	1	1	12	141581	168146	155594	209892	157989	144917	145758	149606	143958	159562	149802	181497		168803	149568	158705	477076		1.06363	0.942425		0.577367	0.3598
A6NJA2;J3KS55;J3QQT6;P54578	>tr|A6NJA2|A6NJA2_HUMAN Ubiquitin carboxyl-terminal hydrolase 14 OS=Homo sapiens GN=USP14 PE=1 SV=2;>tr|J3KS55|J3KS55_HUMAN Ubiquitin carboxyl-terminal hydrolase 14 (Fragment) OS=Homo sapiens GN=USP14 PE=1 SV=1;>tr|J3QQT6|J3QQT6_HUMAN Ubiquitin carboxyl-terminal hydrolase 14 (Fragment) OS=Homo sapiens GN=USP14 PE=1 SV=1;>sp|P54578|UBP14_HUMAN Ubiquitin carboxyl-terminal hydrolase 14 OS=Homo sapie…	1	1	1	1	1	1	1	1	1	1	1	1	12	11721.8	62819.6	58627.5	21147.3	41319.1	23107.6	37969.9	14958	14269.1	46046	11791.1	28718.1		38579.1	29338.7	25206.1	93123.8		1.53055	1.16395		0.418685	0.695707
A8MTM1;E9PQ63;P16152	>tr|A8MTM1|A8MTM1_HUMAN Carbonyl reductase [NADPH] 1 OS=Homo sapiens GN=CBR1 PE=1 SV=1;>tr|E9PQ63|E9PQ63_HUMAN Carbonyl reductase [NADPH] 1 OS=Homo sapiens GN=CBR1 PE=1 SV=1;>sp|P16152|CBR1_HUMAN Carbonyl reductase [NADPH] 1 OS=Homo sapiens GN=CBR1 PE=1 SV=3	5	5	5	5	5	5	5	5	5	5	5	5	60	57102.1	54618.9	53881.1	51648.8	57820.8	60098	58263	48762.4	51690.2	56877.4	53464.1	62079.8		54312.7	56236.1	56027.9	166577		0.969387	1.00372		0.53476	0.953422
B1AUU8;P42566	>tr|B1AUU8|B1AUU8_HUMAN Epidermal growth factor receptor substrate 15 OS=Homo sapiens GN=EPS15 PE=1 SV=1;>sp|P42566|EPS15_HUMAN Epidermal growth factor receptor substrate 15 OS=Homo sapiens GN=EPS15 PE=1 SV=2	8	8	8	8	8	8	8	8	8	8	8	8	96	15765.9	26834	31482.3	24451.8	21745.4	24753.4	31053.9	24866.4	23321.5	19356.8	18359.4	21335.4		24633.5	25604.8	20593.3	70831.6		1.19619	1.24336		0.315169	0.0788607
B4DIH5;H0YKU5;P61201	>tr|B4DIH5|B4DIH5_HUMAN COP9 signalosome complex subunit 2 OS=Homo sapiens GN=COPS2 PE=1 SV=1;>tr|H0YKU5|H0YKU5_HUMAN COP9 signalosome complex subunit 2 (Fragment) OS=Homo sapiens GN=COPS2 PE=1 SV=1;>sp|P61201|CSN2_HUMAN COP9 signalosome complex subunit 2 OS=Homo sapiens GN=COPS2 PE=1 SV=1	2	2	2	2	2	2	2	2	2	2	2	2	24	20438.8	19275.1	20763.4	19687.1	17770.7	17141.5	17679.6	38069.1	19437.2	18582	17834.6	20965.7		20041.1	22665.2	19204.9	61911.2		1.04354	1.18018		0.323447	0.550483
A0A140T9R1;O75955	>tr|A0A140T9R1|A0A140T9R1_HUMAN Flotillin-1 (Fragment) OS=Homo sapiens GN=FLOT1 PE=1 SV=1;>sp|O75955|FLOT1_HUMAN Flotillin-1 OS=Homo sapiens GN=FLOT1 PE=1 SV=3	6	6	6	6	6	6	6	6	6	6	6	6	72	37238.1	318580	214730	35517.9	34362.6	32902.7	33870.4	264720	263961	44671.2	44692.6	30509		151516	91463.9	95958.4	338939		1.57898	0.953161		0.558729	0.957297
B4DUR8;P49368	>tr|B4DUR8|B4DUR8_HUMAN T-complex protein 1 subunit gamma OS=Homo sapiens GN=CCT3 PE=1 SV=1;>sp|P49368|TCPG_HUMAN T-complex protein 1 subunit gamma OS=Homo sapiens GN=CCT3 PE=1 SV=4	13	13	13	13	13	13	13	13	13	13	13	13	156	73795.7	115063	64383.8	38463.9	93575.3	89768.5	90218.3	92238.6	62112.9	90135.3	61903.4	63505.1		72926.6	91450.2	69414.2	233791		1.0506	1.31746		0.849204	0.0486489
A6NFX8;Q9UKK9	>tr|A6NFX8|A6NFX8_HUMAN ADP-sugar pyrophosphatase OS=Homo sapiens GN=NUDT5 PE=1 SV=1;>sp|Q9UKK9|NUDT5_HUMAN ADP-sugar pyrophosphatase OS=Homo sapiens GN=NUDT5 PE=1 SV=1	9	9	9	9	9	9	9	9	9	9	9	9	108	143052	166363	162270	213157	183847	160482	165347	180013	186225	188151	178522	187451		171210	172422	185087	528720		0.925025	0.931572		0.421635	0.106224
B5MDF5;J3KQE5;P62826	>tr|B5MDF5|B5MDF5_HUMAN GTP-binding nuclear protein Ran OS=Homo sapiens GN=RAN PE=1 SV=1;>tr|J3KQE5|J3KQE5_HUMAN GTP-binding nuclear protein Ran (Fragment) OS=Homo sapiens GN=RAN PE=1 SV=1;>sp|P62826|RAN_HUMAN GTP-binding nuclear protein Ran OS=Homo sapiens GN=RAN PE=1 SV=3	5	5	5	5	5	5	5	5	5	5	5	5	60	109994	101991	80966.5	70454.4	96822.4	104806	107822	109010	92128.5	98793.5	93041.3	74009.4		90851.5	104615	89493.2	284960		1.01518	1.16897		0.903244	0.0597286
B7ZAR1;E7ENZ3;E9PCA1;P48643	>tr|B7ZAR1|B7ZAR1_HUMAN T-complex protein 1 subunit epsilon OS=Homo sapiens GN=CCT5 PE=1 SV=1;>tr|E7ENZ3|E7ENZ3_HUMAN T-complex protein 1 subunit epsilon OS=Homo sapiens GN=CCT5 PE=1 SV=1;>tr|E9PCA1|E9PCA1_HUMAN T-complex protein 1 subunit epsilon OS=Homo sapiens GN=CCT5 PE=1 SV=1;>sp|P48643|TCPE_HUMAN T-complex protein 1 subunit epsilon OS=Homo sapiens GN=CCT5 PE=1 SV=1	5	5	5	5	5	5	5	5	5	5	5	5	60	59580.3	62009.9	49704.2	44069.9	45151.1	68595.8	64150.4	55753.9	47109.6	62266.7	57170.7	54894.1		53841.1	58412.8	55360.3	167614		0.972558	1.05514		0.783026	0.635309
C9J1E1;P53004	>tr|C9J1E1|C9J1E1_HUMAN Biliverdin reductase A (Fragment) OS=Homo sapiens GN=BLVRA PE=1 SV=1;>sp|P53004|BIEA_HUMAN Biliverdin reductase A OS=Homo sapiens GN=BLVRA PE=1 SV=2	1	1	1	1	1	1	1	1	1	1	1	1	12	28703.4	20525.8	40072.3	23368.3	37210.4	44172.9	46087.3	29844.5	15767.8	14575.6	15691.4	12103		28167.4	39328.8	14534.4	82030.7		1.93798	2.70591		0.0482174	0.0052698
C9J1G2;C9JRD2;C9JX00;C9JXB9;E7ETU0;P25686	>tr|C9J1G2|C9J1G2_HUMAN DnaJ homolog subfamily B member 2 (Fragment) OS=Homo sapiens GN=DNAJB2 PE=1 SV=1;>tr|C9JRD2|C9JRD2_HUMAN DnaJ homolog subfamily B member 2 (Fragment) OS=Homo sapiens GN=DNAJB2 PE=1 SV=1;>tr|C9JX00|C9JX00_HUMAN DnaJ homolog subfamily B member 2 (Fragment) OS=Homo sapiens GN=DNAJB2 PE=1 SV=1;>tr|C9JXB9|C9JXB9_HUMAN DnaJ homolog subfamily B member 2 (Fragment) OS=Homo sapiens…	3	3	3	3	3	3	3	3	3	3	3	3	36	32758	42063.6	39008.6	56258.6	22741.2	45632.9	43913.7	45180.7	44672.4	39751.5	34453.3	29208.5		42522.2	39367.1	37021.4	118911		1.14858	1.06336		0.398517	0.732369
C9J4W5;C9J7B5;F8WCJ1;I3L397;I3L504;P63241;Q6IS14;Q9GZV4	>tr|C9J4W5|C9J4W5_HUMAN Eukaryotic translation initiation factor 5A (Fragment) OS=Homo sapiens GN=EIF5A2 PE=1 SV=1;>tr|C9J7B5|C9J7B5_HUMAN Eukaryotic translation initiation factor 5A OS=Homo sapiens GN=EIF5A2 PE=1 SV=1;>tr|F8WCJ1|F8WCJ1_HUMAN Eukaryotic translation initiation factor 5A OS=Homo sapiens GN=EIF5A2 PE=1 SV=1;>tr|I3L397|I3L397_HUMAN Eukaryotic translation initiation factor 5A (Fragmen…	1	1	1	1	1	1	1	1	1	1	1	1	12	14840.7	22604.5	18043.2	25392.3	8621.57	12788.9	12940.8	19941.2	12362.8	8141.67	10977.4	12263.9		20220.2	13573.1	10936.5	44729.7		1.84888	1.24109		0.021607	0.358328
C9J6A7;Q2QD12;Q96AT9	>tr|C9J6A7|C9J6A7_HUMAN Ribulose-phosphate 3-epimerase (Fragment) OS=Homo sapiens GN=RPE PE=1 SV=1;>sp|Q2QD12|RPEL1_HUMAN Ribulose-phosphate 3-epimerase-like protein 1 OS=Homo sapiens GN=RPEL1 PE=2 SV=1;>sp|Q96AT9|RPE_HUMAN Ribulose-phosphate 3-epimerase OS=Homo sapiens GN=RPE PE=1 SV=1	1	1	1	1	1	1	1	1	1	1	1	1	12	45204.3	54391.2	47558.1	56988.6	52455	28638.9	48986	45536.7	48805.8	49937.9	40822.3	48344.8		51035.6	43904.2	46977.7	141917		1.08638	0.934574		0.290203	0.617506
C9J6D1;C9JZI7;E9PJJ2;E9PKT8;E9PNJ7;E9PNW0;E9PS34;Q99733	>tr|C9J6D1|C9J6D1_HUMAN Nucleosome assembly protein 1-like 4 (Fragment) OS=Homo sapiens GN=NAP1L4 PE=1 SV=1;>tr|C9JZI7|C9JZI7_HUMAN Nucleosome assembly protein 1-like 4 (Fragment) OS=Homo sapiens GN=NAP1L4 PE=1 SV=1;>tr|E9PJJ2|E9PJJ2_HUMAN Nucleosome assembly protein 1-like 4 (Fragment) OS=Homo sapiens GN=NAP1L4 PE=1 SV=1;>tr|E9PKT8|E9PKT8_HUMAN Nucleosome assembly protein 1-like 4 (Fragment) OS=…	3	3	3	3	3	3	3	3	3	3	3	3	36	48457.2	64386.4	44824.9	47164.3	61607.2	56275.7	55814.1	38017.4	56821.6	74377.1	50373.5	72716.5		51208.2	52928.6	63572.2	167709		0.805513	0.832575		0.149905	0.224264
C9JEV0;P25311	>tr|C9JEV0|C9JEV0_HUMAN Zinc-alpha-2-glycoprotein OS=Homo sapiens GN=AZGP1 PE=1 SV=1;>sp|P25311|ZA2G_HUMAN Zinc-alpha-2-glycoprotein OS=Homo sapiens GN=AZGP1 PE=1 SV=2	1	1	1	1	1	1	1	1	1	1	1	1	12	26277.1	608968	25165.2	18080	25738.1	19756	25205.2	12788.4	12199.5	18838.9	26432.3	22798.1		169623	20871.9	20067.2	210562		8.45273	1.0401		0.382385	0.857248
B4DUC8;F2Z2F3;J3QSB7;Q13126	>tr|B4DUC8|B4DUC8_HUMAN S-methyl-5'-thioadenosine phosphorylase OS=Homo sapiens GN=MTAP PE=1 SV=1;>tr|F2Z2F3|F2Z2F3_HUMAN Uncharacterized protein OS=Homo sapiens PE=4 SV=1;>tr|J3QSB7|J3QSB7_HUMAN Purine nucleoside phosphorylase OS=Homo sapiens GN=MTAP PE=1 SV=1;>sp|Q13126|MTAP_HUMAN S-methyl-5'-thioadenosine phosphorylase OS=Homo sapiens GN=MTAP PE=1 SV=2	4	4	4	4	4	4	4	4	4	4	4	4	48	124908	140567	118833	142136	138976	126723	132951	146736	145169	132703	153965	146554		131611	136347	144598	412555		0.910186	0.942937		0.127259	0.227624
C9JLV5;J3KTQ1;J3QKR0;J3QL22;J3QS85;Q9UNS2	>tr|C9JLV5|C9JLV5_HUMAN COP9 signalosome complex subunit 3 (Fragment) OS=Homo sapiens GN=COPS3 PE=1 SV=8;>tr|J3KTQ1|J3KTQ1_HUMAN COP9 signalosome complex subunit 3 OS=Homo sapiens GN=COPS3 PE=1 SV=1;>tr|J3QKR0|J3QKR0_HUMAN COP9 signalosome complex subunit 3 OS=Homo sapiens GN=COPS3 PE=1 SV=1;>tr|J3QL22|J3QL22_HUMAN COP9 signalosome complex subunit 3 OS=Homo sapiens GN=COPS3 PE=1 SV=1;>tr|J3QS85|J…	1	1	1	1	1	1	1	1	1	1	1	1	12	300649	310732	307427	352854	352707	358296	327851	398488	347485	365640	412472	399540		317916	359336	381284	1.05854e+06		0.833802	0.942435		0.0173092	0.334978
C9JQT8;C9JUV8;E9PRR1;O00478;P78410;S4R3N0	>tr|C9JQT8|C9JQT8_HUMAN Butyrophilin subfamily 3 member A3 (Fragment) OS=Homo sapiens GN=BTN3A3 PE=1 SV=8;>tr|C9JUV8|C9JUV8_HUMAN Butyrophilin subfamily 3 member A3 (Fragment) OS=Homo sapiens GN=BTN3A3 PE=1 SV=1;>tr|E9PRR1|E9PRR1_HUMAN Butyrophilin subfamily 3 member A2 (Fragment) OS=Homo sapiens GN=BTN3A2 PE=1 SV=1;>sp|O00478|BT3A3_HUMAN Butyrophilin subfamily 3 member A3 OS=Homo sapiens GN=BTN3…	1	1	1	1	1	1	1	1	1	1	1	1	12	325354	390896	253397	214580	291043	267549	257472	324765	309274	311532	310844	216264		296057	285207	286978	868242		1.03163	0.993829		0.850229	0.951835
B4DV12;F5GXK7;F5GYU3;F5H265;F5H2Z3;F5H388;F5H6Q2;F5H747;J3QKN0;J3QS39;J3QTR3;P0CG47;P0CG48;P62979;P62987;Q5PY61;Q96C32	>tr|B4DV12|B4DV12_HUMAN Polyubiquitin-B OS=Homo sapiens GN=UBB PE=1 SV=1;>tr|F5GXK7|F5GXK7_HUMAN Polyubiquitin-C (Fragment) OS=Homo sapiens GN=UBC PE=1 SV=2;>tr|F5GYU3|F5GYU3_HUMAN Polyubiquitin-C (Fragment) OS=Homo sapiens GN=UBC PE=1 SV=1;>tr|F5H265|F5H265_HUMAN Polyubiquitin-C (Fragment) OS=Homo sapiens GN=UBC PE=1 SV=1;>tr|F5H2Z3|F5H2Z3_HUMAN Polyubiquitin-C (Fragment) OS=Homo sapiens GN=UBC …	8	8	8	8	8	8	8	8	8	8	8	8	96	12906598	14429426	14003524	20583396	17596596	12907164	15024915	17552244	18821970	17246698	16113845	17677738		15480736	1.57702e+07	1.74651e+07	4.8716e+07		0.886383	0.902959		0.342568	0.243547
C9JIF9;P13798	>tr|C9JIF9|C9JIF9_HUMAN Acylamino-acid-releasing enzyme OS=Homo sapiens GN=APEH PE=1 SV=1;>sp|P13798|ACPH_HUMAN Acylamino-acid-releasing enzyme OS=Homo sapiens GN=APEH PE=1 SV=4	18	18	18	18	18	18	18	18	18	18	18	18	216	3143410	2.91174e+06	3238679	3.21149e+06	2.95053e+06	3.0905e+06	3.08177e+06	2.82639e+06	2.92218e+06	2.70415e+06	2.84276e+06	3.00594e+06		3.12633e+06	2.9873e+06	2.86876e+06	8.98239e+06		1.08978	1.04132		0.0401716	0.2339
E5RJR5;P63208	>tr|E5RJR5|E5RJR5_HUMAN S-phase kinase-associated protein 1 OS=Homo sapiens GN=SKP1 PE=1 SV=1;>sp|P63208|SKP1_HUMAN S-phase kinase-associated protein 1 OS=Homo sapiens GN=SKP1 PE=1 SV=2	4	4	4	4	4	4	4	4	4	4	4	4	48	284585	356438	287688	365547	318159	276362	274812	316171	361960	307508	340834	321498		323564	296376	332950	952891		0.971811	0.890152		0.720917	0.0732415
E7EM64;Q7L5N1	>tr|E7EM64|E7EM64_HUMAN COP9 signalosome complex subunit 6 OS=Homo sapiens GN=COPS6 PE=1 SV=1;>sp|Q7L5N1|CSN6_HUMAN COP9 signalosome complex subunit 6 OS=Homo sapiens GN=COPS6 PE=1 SV=1	7	7	7	7	7	7	7	7	7	7	7	7	84	170111	153715	199816	167576	165382	200780	205352	198913	152770	144530	171984	175423		172804	192607	161177	526588		1.07214	1.195		0.380905	0.0391285
E7EPV7;H6UYS7;P37840	>tr|E7EPV7|E7EPV7_HUMAN Alpha-synuclein OS=Homo sapiens GN=SNCA PE=1 SV=1;>tr|H6UYS7|H6UYS7_HUMAN Alpha-synuclein OS=Homo sapiens GN=SNCA PE=1 SV=1;>sp|P37840|SYUA_HUMAN Alpha-synuclein OS=Homo sapiens GN=SNCA PE=1 SV=1	1	1	1	1	1	1	1	1	1	1	1	1	12	163297	190067	180367	255840	196976	172853	184291	163727	203458	174041	193390	169593		197393	179462	185120	561975		1.06629	0.969432		0.603778	0.618086
E7EQ47;F6XSS0;P18577;Q02161	>tr|E7EQ47|E7EQ47_HUMAN Blood group Rh(CE) polypeptide OS=Homo sapiens GN=RHCE PE=4 SV=1;>tr|F6XSS0|F6XSS0_HUMAN Blood group Rh(CE) polypeptide OS=Homo sapiens GN=RHCE PE=3 SV=1;>sp|P18577|RHCE_HUMAN Blood group Rh(CE) polypeptide OS=Homo sapiens GN=RHCE PE=1 SV=2;>sp|Q02161|RHD_HUMAN Blood group Rh(D) polypeptide OS=Homo sapiens GN=RHD PE=1 SV=3	2	2	2	2	2	2	2	2	2	2	2	2	24	26701.2	26551.6	27335.8	26204.1	20582.1	25219.5	24682.1	21075.9	16455.2	28950.8	22595.2	23564.2		26698.2	22889.9	22891.4	72479.4		1.1663	0.999937		0.233877	0.999617
E7EQB2;E7ER44;P02788	>tr|E7EQB2|E7EQB2_HUMAN Lactotransferrin (Fragment) OS=Homo sapiens GN=LTF PE=1 SV=1;>tr|E7ER44|E7ER44_HUMAN Lactotransferrin OS=Homo sapiens GN=LTF PE=1 SV=1;>sp|P02788|TRFL_HUMAN Lactotransferrin OS=Homo sapiens GN=LTF PE=1 SV=6	2	2	2	2	2	2	2	2	2	2	2	2	24	11557.7	756891	12068.3	16797.6	18092.2	13887.2	14950.2	23570.6	22485	26800.3	18580.2	12369.3		199329	17625.1	20058.7	237013		9.93726	0.878674		0.405941	0.543584
E7END7;P62820;Q9H0U4	>tr|E7END7|E7END7_HUMAN Ras-related protein Rab-1A OS=Homo sapiens GN=RAB1A PE=1 SV=1;>sp|P62820|RAB1A_HUMAN Ras-related protein Rab-1A OS=Homo sapiens GN=RAB1A PE=1 SV=3;>sp|Q9H0U4|RAB1B_HUMAN Ras-related protein Rab-1B OS=Homo sapiens GN=RAB1B PE=1 SV=1	4	4	4	4	4	4	4	4	4	4	4	4	48	2.28781e+06	2306296	2.38293e+06	1224287	2.14547e+06	2.27549e+06	2.44242e+06	2.34516e+06	1.91651e+06	2.07711e+06	2.23347e+06	2.06765e+06		2.05033e+06	2.30213e+06	2.07368e+06	6.42615e+06		0.988739	1.11016		0.93908	0.0441285
E9NSU1;K7EKN6;M0QYS8;Q13336	>tr|E9NSU1|E9NSU1_HUMAN Truncated urea transporter OS=Homo sapiens GN=SLC14A1 PE=1 SV=1;>tr|K7EKN6|K7EKN6_HUMAN Urea transporter 1 (Fragment) OS=Homo sapiens GN=SLC14A1 PE=1 SV=1;>tr|M0QYS8|M0QYS8_HUMAN Urea transporter 1 (Fragment) OS=Homo sapiens GN=SLC14A1 PE=1 SV=1;>sp|Q13336|UT1_HUMAN Urea transporter 1 OS=Homo sapiens GN=SLC14A1 PE=1 SV=2	1	1	1	1	1	1	1	1	1	1	1	1	12	8685236	10613076	8979328	12167345	10138626	7885657	9079949	10057442	12102577	8320557	9356964	10078446		1.01112e+07	9.29042e+06	9964636	2.93663e+07		1.01471	0.932339		0.901416	0.511291
E9PGT1;H7C1D4;Q15631	>tr|E9PGT1|E9PGT1_HUMAN Translin OS=Homo sapiens GN=TSN PE=1 SV=1;>tr|H7C1D4|H7C1D4_HUMAN Translin (Fragment) OS=Homo sapiens GN=TSN PE=1 SV=1;>sp|Q15631|TSN_HUMAN Translin OS=Homo sapiens GN=TSN PE=1 SV=1	4	4	4	4	4	4	4	4	4	4	4	4	48	42988	55477.3	49623.3	59467	42768.6	52613.9	48746.3	46276.9	49234.1	51117.3	47836.2	54019.6		51888.9	47601.4	50551.8	150042		1.02645	0.941637		0.745468	0.283979
E9PI86;E9PPQ8;E9PPR5;P49321	>tr|E9PI86|E9PI86_HUMAN Nuclear autoantigenic sperm protein (Fragment) OS=Homo sapiens GN=NASP PE=1 SV=1;>tr|E9PPQ8|E9PPQ8_HUMAN Nuclear autoantigenic sperm protein (Fragment) OS=Homo sapiens GN=NASP PE=1 SV=1;>tr|E9PPR5|E9PPR5_HUMAN Nuclear autoantigenic sperm protein (Fragment) OS=Homo sapiens GN=NASP PE=1 SV=8;>sp|P49321|NASP_HUMAN Nuclear autoantigenic sperm protein OS=Homo sapiens GN=NASP PE…	1	1	1	1	1	1	1	1	1	1	1	1	12	43574.8	43154.1	45991.9	27909.1	51059.8	46501.3	49919	14186.4	52139.9	45975.6	50563.1	66250.3		40157.5	40416.6	53732.2	134306		0.747363	0.752186		0.0649741	0.240723
E9PK54	>tr|E9PK54|E9PK54_HUMAN Heat shock cognate 71 kDa protein (Fragment) OS=Homo sapiens GN=HSPA8 PE=1 SV=8	1	1	1	1	1	1	1	1	1	1	1	1	12	716730	586727	524123	833991	740608	679402	824916	511278	817934	759909	595090	766005		665393	689051	734735	2.08918e+06		0.905623	0.937823		0.445634	0.599774
E9PKD5;E9PM69;P17980;R4GNH3	>tr|E9PKD5|E9PKD5_HUMAN 26S proteasome regulatory subunit 6A (Fragment) OS=Homo sapiens GN=PSMC3 PE=1 SV=2;>tr|E9PM69|E9PM69_HUMAN 26S proteasome regulatory subunit 6A OS=Homo sapiens GN=PSMC3 PE=1 SV=1;>sp|P17980|PRS6A_HUMAN 26S proteasome regulatory subunit 6A OS=Homo sapiens GN=PSMC3 PE=1 SV=3;>tr|R4GNH3|R4GNH3_HUMAN 26S proteasome regulatory subunit 6A OS=Homo sapiens GN=PSMC3 PE=1 SV=1	4	4	4	4	4	4	4	4	4	4	4	4	48	57026.9	71456.5	80547.8	55114.4	64401.2	72287.2	94093.5	57461.2	66160.7	77642.7	99539.4	72371.2		66036.4	72060.8	78928.5	217026		0.836661	0.912988		0.223177	0.547122
E7ENY0;E7EV99;P35611	>tr|E7ENY0|E7ENY0_HUMAN Alpha-adducin OS=Homo sapiens GN=ADD1 PE=1 SV=1;>tr|E7EV99|E7EV99_HUMAN Alpha-adducin OS=Homo sapiens GN=ADD1 PE=1 SV=1;>sp|P35611|ADDA_HUMAN Alpha-adducin OS=Homo sapiens GN=ADD1 PE=1 SV=2	31	31	31	31	31	31	31	31	31	31	31	31	372	2086919	1.68878e+06	1.95075e+06	2.23989e+06	2.09845e+06	2.13948e+06	1.97167e+06	2.01215e+06	2.00072e+06	1.92134e+06	2054159	2.2225e+06		1.99158e+06	2.05544e+06	2.04968e+06	6.0967e+06		0.971655	1.00281		0.682233	0.941414
E9PMR6;Q9NZN5	>tr|E9PMR6|E9PMR6_HUMAN Rho guanine nucleotide exchange factor 12 OS=Homo sapiens GN=ARHGEF12 PE=1 SV=1;>sp|Q9NZN5|ARHGC_HUMAN Rho guanine nucleotide exchange factor 12 OS=Homo sapiens GN=ARHGEF12 PE=1 SV=1	1	1	1	1	1	1	1	1	1	1	1	1	12	1.68158e+06	2.1888e+06	1.70672e+06	1.79268e+06	1.96447e+06	1760188	1.83257e+06	1.72159e+06	1.97559e+06	1902376	1.86071e+06	2.03376e+06		1.84244e+06	1.8197e+06	1.94311e+06	5.60526e+06		0.948193	0.936491		0.466687	0.114948
E9PNW4;E9PR17;P13987	>tr|E9PNW4|E9PNW4_HUMAN CD59 glycoprotein OS=Homo sapiens GN=CD59 PE=1 SV=1;>tr|E9PR17|E9PR17_HUMAN CD59 glycoprotein OS=Homo sapiens GN=CD59 PE=1 SV=1;>sp|P13987|CD59_HUMAN CD59 glycoprotein OS=Homo sapiens GN=CD59 PE=1 SV=1	5	5	5	5	5	5	5	5	5	5	5	5	60	10395	11702.2	16392.3	8053.59	12127.4	11421.5	27106.9	17193.2	12910.5	27628.4	21811.1	12832.3		11635.8	16962.3	18795.6	47393.7		0.61907	0.90246		0.144209	0.732459
E9PP50;P23528	>tr|E9PP50|E9PP50_HUMAN Cofilin-1 (Fragment) OS=Homo sapiens GN=CFL1 PE=1 SV=8;>sp|P23528|COF1_HUMAN Cofilin-1 OS=Homo sapiens GN=CFL1 PE=1 SV=3	3	3	3	3	3	3	3	3	3	3	3	3	36	49158.8	61657.6	53484.4	67244.2	61053.9	55571.9	55203.4	120696	71978.4	65060.8	66802	28899.3		57886.3	73131.3	58185.1	189203		0.994864	1.25687		0.979006	0.460889
E9PPM8;Q9Y315	>tr|E9PPM8|E9PPM8_HUMAN Deoxyribose-phosphate aldolase OS=Homo sapiens GN=DERA PE=1 SV=1;>sp|Q9Y315|DEOC_HUMAN Deoxyribose-phosphate aldolase OS=Homo sapiens GN=DERA PE=1 SV=2	4	4	4	4	4	4	4	4	4	4	4	4	48	42997.8	62976.8	34349.7	16379.9	73031.8	48571.8	93971.2	75146.3	73205.9	74451.5	72240.7	61528.6		39176	72680.3	70356.7	182213		0.55682	1.03303		0.0431201	0.825026
E7EX29;P63104	>tr|E7EX29|E7EX29_HUMAN 14-3-3 protein zeta/delta (Fragment) OS=Homo sapiens GN=YWHAZ PE=1 SV=1;>sp|P63104|1433Z_HUMAN 14-3-3 protein zeta/delta OS=Homo sapiens GN=YWHAZ PE=1 SV=1	4	4	4	4	4	4	4	4	4	4	4	4	48	110260	98741.2	133525	149950	137716	142684	141751	147408	134347	143403	164315	153070		123119	142390	148784	414292		0.827501	0.957024		0.112598	0.402234
F5GX23;F5H169;F5H5V4;F5H7X1;J3KN29;O00233	>tr|F5GX23|F5GX23_HUMAN 26S proteasome non-ATPase regulatory subunit 9 OS=Homo sapiens GN=PSMD9 PE=1 SV=1;>tr|F5H169|F5H169_HUMAN 26S proteasome non-ATPase regulatory subunit 9 OS=Homo sapiens GN=PSMD9 PE=1 SV=1;>tr|F5H5V4|F5H5V4_HUMAN 26S proteasome non-ATPase regulatory subunit 9 (Fragment) OS=Homo sapiens GN=PSMD9 PE=1 SV=1;>tr|F5H7X1|F5H7X1_HUMAN 26S proteasome non-ATPase regulatory subunit 9…	1	1	1	1	1	1	1	1	1	1	1	1	12	104722	118430	114198	107606	120106	91317	83013.8	88886.9	112811	116348	108484	105599		111239	95831	110811	317880		1.00386	0.864817		0.916624	0.167278
F5GY55;Q16531	>tr|F5GY55|F5GY55_HUMAN DNA damage-binding protein 1 OS=Homo sapiens GN=DDB1 PE=1 SV=1;>sp|Q16531|DDB1_HUMAN DNA damage-binding protein 1 OS=Homo sapiens GN=DDB1 PE=1 SV=1	4	4	4	4	4	4	4	4	4	4	4	4	48	29644	20444.3	28617.5	24671.5	11048.4	21779.5	20928.3	18554.6	19700.5	16056.6	24482.7	21176.3		25844.3	18077.7	20354	64276		1.26974	0.888162		0.0923317	0.479741
F5GYG5;H0YG54;H0YGR4;Q9Y3B8	>tr|F5GYG5|F5GYG5_HUMAN Oligoribonuclease, mitochondrial OS=Homo sapiens GN=REXO2 PE=1 SV=1;>tr|H0YG54|H0YG54_HUMAN Oligoribonuclease, mitochondrial OS=Homo sapiens GN=REXO2 PE=1 SV=2;>tr|H0YGR4|H0YGR4_HUMAN Oligoribonuclease, mitochondrial (Fragment) OS=Homo sapiens GN=REXO2 PE=1 SV=1;>sp|Q9Y3B8|ORN_HUMAN Oligoribonuclease, mitochondrial OS=Homo sapiens GN=REXO2 PE=1 SV=3	2	2	2	2	2	2	2	2	2	2	2	2	24	74694.9	61334.3	46458.6	58784.2	68828.7	45420.2	53446.1	61940.8	55498.3	60965.5	43303.1	57171.7		60318	57409	54234.6	171962		1.11217	1.05853		0.419111	0.636807
F5H0C8;P09104	>tr|F5H0C8|F5H0C8_HUMAN Gamma-enolase OS=Homo sapiens GN=ENO2 PE=1 SV=1;>sp|P09104|ENOG_HUMAN Gamma-enolase OS=Homo sapiens GN=ENO2 PE=1 SV=3	1	1	1	1	1	1	1	1	1	1	1	1	12	15506.6	80640	48991.5	62536.5	82474.1	76078.1	80659.4	85313	74192.5	71200.2	13848.6	91187		51918.6	81131.2	62607.1	195657		0.829277	1.29588		0.641185	0.352474
E9PLK3;P55786	>tr|E9PLK3|E9PLK3_HUMAN Aminopeptidase OS=Homo sapiens GN=NPEPPS PE=1 SV=1;>sp|P55786|PSA_HUMAN Puromycin-sensitive aminopeptidase OS=Homo sapiens GN=NPEPPS PE=1 SV=2	18	18	18	18	18	18	18	18	18	18	18	18	216	139134	143429	132446	136013	144259	140957	144692	138087	135543	146018	138523	151946		137755	141999	143007	422761		0.963276	0.992947		0.283577	0.814021
F5GWF6;F8VQ14;P78371	>tr|F5GWF6|F5GWF6_HUMAN T-complex protein 1 subunit beta OS=Homo sapiens GN=CCT2 PE=1 SV=2;>tr|F8VQ14|F8VQ14_HUMAN T-complex protein 1 subunit beta OS=Homo sapiens GN=CCT2 PE=1 SV=1;>sp|P78371|TCPB_HUMAN T-complex protein 1 subunit beta OS=Homo sapiens GN=CCT2 PE=1 SV=4	4	4	4	4	4	4	4	4	4	4	4	4	48	94542.8	87978.6	99415.7	93068.2	106577	111502	101742	111996	93074.6	99045.4	97395	116742		93751.3	107954	101564	303270		0.923073	1.06292		0.240963	0.325059
F5H2F4;P11586	>tr|F5H2F4|F5H2F4_HUMAN C-1-tetrahydrofolate synthase, cytoplasmic OS=Homo sapiens GN=MTHFD1 PE=1 SV=1;>sp|P11586|C1TC_HUMAN C-1-tetrahydrofolate synthase, cytoplasmic OS=Homo sapiens GN=MTHFD1 PE=1 SV=3	20	20	20	20	20	20	20	20	20	20	20	20	240	131080	163384	119140	143256	137150	137229	125935	132417	142499	133614	140468	126503		139215	133183	135771	408169		1.02537	0.980936		0.751165	0.58794
F8W1I6;Q13561	>tr|F8W1I6|F8W1I6_HUMAN Dynactin subunit 2 OS=Homo sapiens GN=DCTN2 PE=1 SV=1;>sp|Q13561|DCTN2_HUMAN Dynactin subunit 2 OS=Homo sapiens GN=DCTN2 PE=1 SV=4	4	4	4	4	4	4	4	4	4	4	4	4	48	64160.2	47840	59450.1	58258.1	79752.9	58885.4	54022.2	63532.6	70950.1	34741.2	56417.5	33542.9		57427.1	64048.3	48912.9	170388		1.17407	1.30943		0.429903	0.213376
F5H423;P61204;P84077	>tr|F5H423|F5H423_HUMAN Uncharacterized protein OS=Homo sapiens PE=3 SV=1;>sp|P61204|ARF3_HUMAN ADP-ribosylation factor 3 OS=Homo sapiens GN=ARF3 PE=1 SV=2;>sp|P84077|ARF1_HUMAN ADP-ribosylation factor 1 OS=Homo sapiens GN=ARF1 PE=1 SV=2	6	6	6	6	6	6	6	6	6	6	6	6	72	686213	576040	637706	405559	625359	617284	618457	600571	639274	580092	556574	293623		576379	615418	517391	1.70919e+06		1.11401	1.18946		0.570526	0.290758
G3V180;G3V1D3;Q9NY33	>tr|G3V180|G3V180_HUMAN Dipeptidyl peptidase 3 OS=Homo sapiens GN=DPP3 PE=1 SV=1;>tr|G3V1D3|G3V1D3_HUMAN Dipeptidyl peptidase 3 OS=Homo sapiens GN=DPP3 PE=1 SV=1;>sp|Q9NY33|DPP3_HUMAN Dipeptidyl peptidase 3 OS=Homo sapiens GN=DPP3 PE=1 SV=2	14	14	14	14	14	14	14	14	14	14	14	14	168	48326.8	45134.8	52487.1	55135.3	53333	61768.4	57275.4	53883.5	44650	47098.4	53431.4	62077.5		50271	56565.1	51814.3	158650		0.970214	1.09169		0.744872	0.330529
G3V1N2	>tr|G3V1N2|G3V1N2_HUMAN HCG1745306, isoform CRA_a OS=Homo sapiens GN=HBA2 PE=1 SV=1	1	1	1	1	1	1	1	1	1	1	1	1	12	18503160	18717136	31276264	22307078	18085610	15882823	16028427	18055802	18209028	17346772	18038574	21984796		2.27009e+07	1.70132e+07	1.88948e+07	5.86089e+07		1.20144	0.900416		0.300182	0.183291
F8VQQ8;P61088	>tr|F8VQQ8|F8VQQ8_HUMAN Ubiquitin-conjugating enzyme E2 N OS=Homo sapiens GN=UBE2N PE=1 SV=1;>sp|P61088|UBE2N_HUMAN Ubiquitin-conjugating enzyme E2 N OS=Homo sapiens GN=UBE2N PE=1 SV=1	4	4	4	4	4	4	4	4	4	4	4	4	48	250595	236433	244824	259574	267769	255977	261253	230709	276151	267086	239906	302135		247857	253927	271320	773103		0.913523	0.935897		0.165517	0.303216
G3V4P8;P60983	>tr|G3V4P8|G3V4P8_HUMAN Glia maturation factor beta (Fragment) OS=Homo sapiens GN=GMFB PE=1 SV=1;>sp|P60983|GMFB_HUMAN Glia maturation factor beta OS=Homo sapiens GN=GMFB PE=1 SV=2	4	4	4	4	4	4	4	4	4	4	4	4	48	22011.8	39429.6	18799.9	20179.7	20113	19828.4	23191.9	19087.2	21189	32098.6	20774.6	21089		25105.3	20555.1	23787.8	69448.2		1.05538	0.864105		0.822492	0.335516
G3V5E5;H0YJJ8;P49770	>tr|G3V5E5|G3V5E5_HUMAN Translation initiation factor eIF-2B subunit beta OS=Homo sapiens GN=EIF2B2 PE=1 SV=1;>tr|H0YJJ8|H0YJJ8_HUMAN Translation initiation factor eIF-2B subunit beta (Fragment) OS=Homo sapiens GN=EIF2B2 PE=1 SV=1;>sp|P49770|EI2BB_HUMAN Translation initiation factor eIF-2B subunit beta OS=Homo sapiens GN=EIF2B2 PE=1 SV=3	2	2	2	2	2	2	2	2	2	2	2	2	24	54947.6	22683	14314.3	39189.5	13995.7	55037.5	12604.5	19872.2	29527.7	16864	13628.1	67120		32783.6	25377.5	31785	89946		1.03142	0.798411		0.950015	0.700304
G5E977;Q6XQN6	>tr|G5E977|G5E977_HUMAN Nicotinate phosphoribosyltransferase OS=Homo sapiens GN=NAPRT PE=1 SV=1;>sp|Q6XQN6|PNCB_HUMAN Nicotinate phosphoribosyltransferase OS=Homo sapiens GN=NAPRT PE=1 SV=2	6	6	6	6	6	6	6	6	6	6	6	6	72	61990.4	47711.2	45706.4	48976.7	62746	54485.1	67287	52271.8	47848.3	63232.5	48259.3	55277		51096.2	59197.5	53654.3	163948		0.952323	1.10331		0.638411	0.314012
F8W914;Q9NQC3	>tr|F8W914|F8W914_HUMAN Reticulon OS=Homo sapiens GN=RTN4 PE=1 SV=1;>sp|Q9NQC3|RTN4_HUMAN Reticulon-4 OS=Homo sapiens GN=RTN4 PE=1 SV=2	2	2	2	2	2	2	2	2	2	2	2	2	24	103268	22767	183315	278013	222301	181830	178513	166289	196170	154375	120223	259568		146841	187233	182584	516658		0.804237	1.02546		0.592929	0.892789
G3V295;G3V3I1;G3V5Z7;P60900	>tr|G3V295|G3V295_HUMAN Proteasome subunit alpha type OS=Homo sapiens GN=PSMA6 PE=1 SV=1;>tr|G3V3I1|G3V3I1_HUMAN Proteasome subunit alpha type OS=Homo sapiens GN=PSMA6 PE=1 SV=1;>tr|G3V5Z7|G3V5Z7_HUMAN Proteasome subunit alpha type OS=Homo sapiens GN=PSMA6 PE=1 SV=1;>sp|P60900|PSA6_HUMAN Proteasome subunit alpha type-6 OS=Homo sapiens GN=PSMA6 PE=1 SV=1	4	4	4	4	4	4	4	4	4	4	4	4	48	182542	190749	190565	189473	192287	270950	190681	230248	176807	177482	222382	198461		188332	221041	193783	603157		0.971872	1.14066		0.650941	0.269752
H0YBS0	>tr|H0YBS0|H0YBS0_HUMAN Ankyrin-1 (Fragment) OS=Homo sapiens GN=ANK1 PE=1 SV=1	2	2	2	2	2	2	2	2	2	2	2	2	24	47787.4	32308.5	24242.1	52803.7	21621.1	28167.9	26165	16595.8	34103.6	48825	52263.4	49146.8		39285.4	23137.5	46084.7	108508		0.852461	0.502064		0.423024	0.00485005
H0YLC7;P16930	>tr|H0YLC7|H0YLC7_HUMAN Fumarylacetoacetase (Fragment) OS=Homo sapiens GN=FAH PE=1 SV=1;>sp|P16930|FAAA_HUMAN Fumarylacetoacetase OS=Homo sapiens GN=FAH PE=1 SV=2	2	2	2	2	2	2	2	2	2	2	2	2	24	19669.8	18604.3	26449.1	50906.6	37454	27414	49430.3	40129.8	50943.2	21382.4	53292.6	39111.7		28907.5	38607	41182.5	108697		0.701936	0.937462		0.286231	0.776209
G5E9R5;P24666	>tr|G5E9R5|G5E9R5_HUMAN Acid phosphatase 1, soluble, isoform CRA_d OS=Homo sapiens GN=ACP1 PE=1 SV=1;>sp|P24666|PPAC_HUMAN Low molecular weight phosphotyrosine protein phosphatase OS=Homo sapiens GN=ACP1 PE=1 SV=3	3	3	3	3	3	3	3	3	3	3	3	3	36	155943	164952	126945	178363	159484	154040	167759	149028	142401	144028	150139	195948		156551	157578	158129	472257		0.990021	0.996515		0.928048	0.96923
H0Y7A7;P0DP23;P0DP24;P0DP25	>tr|H0Y7A7|H0Y7A7_HUMAN Calmodulin-2 (Fragment) OS=Homo sapiens GN=CALM2 PE=1 SV=1;>sp|P0DP23|CALM1_HUMAN Calmodulin-1 OS=Homo sapiens GN=CALM1 PE=1 SV=1;>sp|P0DP24|CALM2_HUMAN Calmodulin-2 OS=Homo sapiens GN=CALM2 PE=1 SV=1;>sp|P0DP25|CALM3_HUMAN Calmodulin-3 OS=Homo sapiens GN=CALM3 PE=1 SV=1	6	6	6	6	6	6	6	6	6	6	6	6	72	1.04153e+06	1.30557e+06	1.27437e+06	1.61312e+06	1144463	1.16443e+06	1.19774e+06	1364539	1.39288e+06	1.25209e+06	1198802	1.33299e+06		1.30865e+06	1.21779e+06	1.29419e+06	3.82063e+06		1.01117	0.940967		0.913766	0.292052
H3BPK3;Q16775	>tr|H3BPK3|H3BPK3_HUMAN Hydroxyacylglutathione hydrolase, mitochondrial (Fragment) OS=Homo sapiens GN=HAGH PE=1 SV=1;>sp|Q16775|GLO2_HUMAN Hydroxyacylglutathione hydrolase, mitochondrial OS=Homo sapiens GN=HAGH PE=1 SV=2	5	5	5	5	5	5	5	5	5	5	5	5	60	927575	1.1193e+06	1.08703e+06	1.30247e+06	1077240	964216	1.01041e+06	1.07874e+06	1.00915e+06	963893	1.03842e+06	1.06468e+06		1.10909e+06	1.03265e+06	1.01903e+06	3.16078e+06		1.08838	1.01336		0.331323	0.71316
H7BZ94;P07237	>tr|H7BZ94|H7BZ94_HUMAN Protein disulfide-isomerase OS=Homo sapiens GN=P4HB PE=1 SV=2;>sp|P07237|PDIA1_HUMAN Protein disulfide-isomerase OS=Homo sapiens GN=P4HB PE=1 SV=3	5	5	5	5	5	5	5	5	5	5	5	5	60	52611	60882.8	53213.5	67458.1	61103.1	57007	50097.2	59006.6	61029.4	67383.8	60316.9	48173		58541.4	56803.5	59225.8	174571		0.988444	0.959101		0.902207	0.626475
H3BPS8;H3BQN4;J3KPS3;P04075	>tr|H3BPS8|H3BPS8_HUMAN Fructose-bisphosphate aldolase A (Fragment) OS=Homo sapiens GN=ALDOA PE=1 SV=1;>tr|H3BQN4|H3BQN4_HUMAN Fructose-bisphosphate aldolase OS=Homo sapiens GN=ALDOA PE=1 SV=1;>tr|J3KPS3|J3KPS3_HUMAN Fructose-bisphosphate aldolase OS=Homo sapiens GN=ALDOA PE=1 SV=1;>sp|P04075|ALDOA_HUMAN Fructose-bisphosphate aldolase A OS=Homo sapiens GN=ALDOA PE=1 SV=2	6	6	6	6	6	6	6	6	6	6	6	6	72	109778	108648	94106.9	117101	109948	93842.3	103651	100073	44507.9	114409	114028	98410.7		107408	101879	92838.8	302126		1.15693	1.09737		0.451436	0.626693
J3KNE3;P68402	>tr|J3KNE3|J3KNE3_HUMAN Platelet-activating factor acetylhydrolase IB subunit beta (Fragment) OS=Homo sapiens GN=PAFAH1B2 PE=1 SV=1;>sp|P68402|PA1B2_HUMAN Platelet-activating factor acetylhydrolase IB subunit beta OS=Homo sapiens GN=PAFAH1B2 PE=1 SV=1	1	1	1	1	1	1	1	1	1	1	1	1	12	92367.6	88985.4	89511.6	112207	79889.2	87486.8	82589.9	75370.2	92806.7	103298	88892.9	76450.6		95767.9	81334	90362.1	267464		1.05982	0.90009		0.515816	0.209475
H7BYY1	>tr|H7BYY1|H7BYY1_HUMAN Tropomyosin 1 (Alpha), isoform CRA_m OS=Homo sapiens GN=TPM1 PE=1 SV=1	31	31	31	31	31	31	31	31	31	31	31	31	372	5396355	5805113	5.58882e+06	7500964	6136610	5636166	6287389	6.02577e+06	5872361	5.80814e+06	6.50115e+06	6890917		6.07281e+06	6.02148e+06	6.26814e+06	1.83624e+07		0.968838	0.960649		0.737608	0.444113
J3KQS5	>tr|J3KQS5|J3KQS5_HUMAN Pleckstrin homology domain-containing family A member 8 (Fragment) OS=Homo sapiens GN=PLEKHA8 PE=1 SV=1	1	1	1	1	1	1	1	1	1	1	1	1	12	376846	585658	532417	499586	544474	360652	382035	468674	617260	384914	471672	383727		498627	438959	464393	1.40198e+06		1.07372	0.945231		0.645642	0.727019
I3L0N3;P46459	>tr|I3L0N3|I3L0N3_HUMAN Vesicle-fusing ATPase OS=Homo sapiens GN=NSF PE=1 SV=1;>sp|P46459|NSF_HUMAN Vesicle-fusing ATPase OS=Homo sapiens GN=NSF PE=1 SV=3	15	15	15	15	15	15	15	15	15	15	15	15	180	788880	745152	867377	826277	749959	813396	863094	751649	771851	848983	761194	971898		806922	794525	838481	2.43993e+06		0.962361	0.947576		0.593964	0.467698
K7EIJ8;K7EM02;Q8IYT4	>tr|K7EIJ8|K7EIJ8_HUMAN Katanin p60 ATPase-containing subunit A-like 2 (Fragment) OS=Homo sapiens GN=KATNAL2 PE=1 SV=1;>tr|K7EM02|K7EM02_HUMAN Katanin p60 ATPase-containing subunit A-like 2 (Fragment) OS=Homo sapiens GN=KATNAL2 PE=1 SV=1;>sp|Q8IYT4|KATL2_HUMAN Katanin p60 ATPase-containing subunit A-like 2 OS=Homo sapiens GN=KATNAL2 PE=1 SV=3	1	1	1	1	1	1	1	1	1	1	1	1	12	432480	405675	446562	446200	460822	521279	511229	410914	386408	463619	509744	561910		432729	476061	480420	1.38921e+06		0.900731	0.990927		0.293453	0.926508
K7ELW0;Q99497	>tr|K7ELW0|K7ELW0_HUMAN Protein/nucleic acid deglycase DJ-1 OS=Homo sapiens GN=PARK7 PE=1 SV=1;>sp|Q99497|PARK7_HUMAN Protein/nucleic acid deglycase DJ-1 OS=Homo sapiens GN=PARK7 PE=1 SV=2	3	3	3	3	3	3	3	3	3	3	3	3	36	36268.4	52379.5	35118	38195.5	18512.5	17685.1	28027.2	29014.3	29826	34392.7	35422.1	25432.3		40490.4	23309.8	31268.3	95068.4		1.29493	0.745477		0.105345	0.0839843
K7EP46;P52888	>tr|K7EP46|K7EP46_HUMAN Thimet oligopeptidase OS=Homo sapiens GN=THOP1 PE=1 SV=1;>sp|P52888|THOP1_HUMAN Thimet oligopeptidase OS=Homo sapiens GN=THOP1 PE=1 SV=2	1	1	1	1	1	1	1	1	1	1	1	1	12	325753	435584	15860.2	348378	95457.5	71805.4	306425	323597	394316	261695	323285	414805		281394	199321	348525	829240		0.807384	0.571899		0.532555	0.111616
K7ER96;O43396	>tr|K7ER96|K7ER96_HUMAN Thioredoxin-like protein 1 (Fragment) OS=Homo sapiens GN=TXNL1 PE=1 SV=1;>sp|O43396|TXNL1_HUMAN Thioredoxin-like protein 1 OS=Homo sapiens GN=TXNL1 PE=1 SV=3	4	4	4	4	4	4	4	4	4	4	4	4	48	70552.1	82406.2	84881.1	82209.8	82147.8	69750.7	71886.1	84539.9	74429.4	78728.8	76876.5	72456.6		80012.3	77081.1	75622.8	232716		1.05804	1.01928		0.276295	0.729783
J3KNF4;O14618	>tr|J3KNF4|J3KNF4_HUMAN Copper chaperone for superoxide dismutase OS=Homo sapiens GN=CCS PE=1 SV=1;>sp|O14618|CCS_HUMAN Copper chaperone for superoxide dismutase OS=Homo sapiens GN=CCS PE=1 SV=1	7	7	7	7	7	7	7	7	7	7	7	7	84	154378	128898	160306	187176	125756	108165	156535	128082	141677	134140	139963	164425		157690	129635	145051	432375		1.08713	0.893716		0.400751	0.25364
M0R165;Q9UBC2	>tr|M0R165|M0R165_HUMAN Epidermal growth factor receptor substrate 15-like 1 OS=Homo sapiens GN=EPS15L1 PE=1 SV=1;>sp|Q9UBC2|EP15R_HUMAN Epidermal growth factor receptor substrate 15-like 1 OS=Homo sapiens GN=EPS15L1 PE=1 SV=1	7	7	7	7	7	7	7	7	7	7	7	7	84	35761.9	37141	41645	47430.7	31245	33682.1	56993	44141.8	28795.7	59001.8	42137.7	36742		40494.6	41515.5	41669.3	123679		0.97181	0.996308		0.873372	0.986438
O00232	>sp|O00232|PSD12_HUMAN 26S proteasome non-ATPase regulatory subunit 12 OS=Homo sapiens GN=PSMD12 PE=1 SV=3	6	6	6	6	6	6	6	6	6	6	6	6	72	36736.3	33484	48741.3	13383.8	69943.1	63478.7	66129.4	48950.3	53333.5	58153.8	59914.3	60159.3		33086.4	62125.4	57890.2	153102		0.571536	1.07316		0.0400846	0.435756
O00487	>sp|O00487|PSDE_HUMAN 26S proteasome non-ATPase regulatory subunit 14 OS=Homo sapiens GN=PSMD14 PE=1 SV=1	4	4	4	4	4	4	4	4	4	4	4	4	48	48451.3	23008.1	13905.1	26194.4	14221.7	28622.6	17397.2	38019.3	17674.7	42338.5	14605.2	52883.5		27889.7	24565.2	31875.5	84330.4		0.874959	0.770661		0.749454	0.530547
J3QRY4;O00231	>tr|J3QRY4|J3QRY4_HUMAN 26S proteasome non-ATPase regulatory subunit 11 (Fragment) OS=Homo sapiens GN=PSMD11 PE=1 SV=8;>sp|O00231|PSD11_HUMAN 26S proteasome non-ATPase regulatory subunit 11 OS=Homo sapiens GN=PSMD11 PE=1 SV=3	4	4	4	4	4	4	4	4	4	4	4	4	48	153987	208537	215600	239628	221198	183232	190437	205644	238227	189134	156291	217782		204438	200128	200358	604924		1.02036	0.99885		0.877577	0.991193
O14980	>sp|O14980|XPO1_HUMAN Exportin-1 OS=Homo sapiens GN=XPO1 PE=1 SV=1	20	20	20	20	20	20	20	20	20	20	20	20	240	96407	99059.2	88239.5	76221.2	90170.8	100726	100813	95552.1	85647.7	99120.5	99071.2	110755		89981.7	96815.4	98648.6	285446		0.912144	0.981417		0.277469	0.763424
O15400	>sp|O15400|STX7_HUMAN Syntaxin-7 OS=Homo sapiens GN=STX7 PE=1 SV=4	6	6	6	6	6	6	6	6	6	6	6	6	72	77967.9	100225	85161.4	98710.3	93693	84261.4	84488.9	82883.9	102143	84717.3	70589.1	91021.5		90516.1	86331.8	87117.7	263966		1.03901	0.990979		0.703752	0.916638
O43242	>sp|O43242|PSMD3_HUMAN 26S proteasome non-ATPase regulatory subunit 3 OS=Homo sapiens GN=PSMD3 PE=1 SV=2	12	12	12	12	12	12	12	12	12	12	12	12	144	21464.5	23393.7	19473.4	27156.6	22938.6	19742.3	22934.2	18657.6	18323.9	20911.7	13102.2	23377.1		22872	21068.2	18928.7	62868.9		1.20833	1.11303		0.204303	0.429085
K7ESE8;Q13867	>tr|K7ESE8|K7ESE8_HUMAN Bleomycin hydrolase (Fragment) OS=Homo sapiens GN=BLMH PE=1 SV=1;>sp|Q13867|BLMH_HUMAN Bleomycin hydrolase OS=Homo sapiens GN=BLMH PE=1 SV=1	4	4	4	4	4	4	4	4	4	4	4	4	48	768890	819595	175584	162488	911070	169726	784223	170352	189245	798422	765698	764578		481639	508843	629485	1.61997e+06		0.765132	0.808347		0.550071	0.64267
O60814;P06899;P23527;P33778;P57053;P58876;P62807;Q16778;Q5QNW6;Q93079;Q96A08;Q99877;Q99879;Q99880;U3KQK0	>sp|O60814|H2B1K_HUMAN Histone H2B type 1-K OS=Homo sapiens GN=HIST1H2BK PE=1 SV=3;>sp|P06899|H2B1J_HUMAN Histone H2B type 1-J OS=Homo sapiens GN=HIST1H2BJ PE=1 SV=3;>sp|P23527|H2B1O_HUMAN Histone H2B type 1-O OS=Homo sapiens GN=HIST1H2BO PE=1 SV=3;>sp|P33778|H2B1B_HUMAN Histone H2B type 1-B OS=Homo sapiens GN=HIST1H2BB PE=1 SV=2;>sp|P57053|H2BFS_HUMAN Histone H2B type F-S OS=Homo sapiens GN=H2BF…	2	2	2	2	2	2	2	2	2	2	2	2	24	19406.2	47285.6	56102.6	46880.2	35361.5	22734.9	25846.4	62548.3	33125.6	37319.1	11010.4	20576.9		42418.6	36622.8	25508	104549		1.66295	1.43574		0.144481	0.351154
O75695	>sp|O75695|XRP2_HUMAN Protein XRP2 OS=Homo sapiens GN=RP2 PE=1 SV=4	2	2	2	2	2	2	2	2	2	2	2	2	24	76330.5	130664	78750.1	113314	77415	67952.7	100687	76387.8	70416.4	109843	126476	68624.5		99764.4	80610.6	93839.8	274215		1.06314	0.859024		0.773297	0.453075
O95294	>sp|O95294|RASL1_HUMAN RasGAP-activating-like protein 1 OS=Homo sapiens GN=RASAL1 PE=1 SV=3	1	1	1	1	1	1	1	1	1	1	1	1	12	108380	178714	150369	212030	193189	152899	166341	192857	231495	153596	231275	172769		162373	176322	197284	535979		0.823043	0.893745		0.285559	0.398465
O14818	>sp|O14818|PSA7_HUMAN Proteasome subunit alpha type-7 OS=Homo sapiens GN=PSMA7 PE=1 SV=1	11	11	11	11	11	11	11	11	11	11	11	11	132	319434	316698	331159	315394	294004	339758	310635	276760	304788	278021	289657	321436		320671	305290	298475	924436		1.07436	1.02283		0.0948712	0.693555
O43765	>sp|O43765|SGTA_HUMAN Small glutamine-rich tetratricopeptide repeat-containing protein alpha OS=Homo sapiens GN=SGTA PE=1 SV=1	5	5	5	5	5	5	5	5	5	5	5	5	60	110511	130821	105171	90382	119117	107409	99814.1	86676.5	122252	110681	109948	117336		109221	103254	115054	327530		0.949304	0.897438		0.548781	0.185013
O95747	>sp|O95747|OXSR1_HUMAN Serine/threonine-protein kinase OSR1 OS=Homo sapiens GN=OXSR1 PE=1 SV=1	11	11	11	11	11	11	11	11	11	11	11	11	132	112057	85635.8	87927.8	150700	92778.9	95241	99572.9	116079	94023	104325	109534	107570		109080	100918	103863	313861		1.05023	0.971644		0.75657	0.658071
O95782	>sp|O95782|AP2A1_HUMAN AP-2 complex subunit alpha-1 OS=Homo sapiens GN=AP2A1 PE=1 SV=3	8	8	8	8	8	8	8	8	8	8	8	8	96	106697	111719	94315.6	71570.4	123937	115970	125511	126405	120691	91552.5	121246	132651		96075.5	122956	116535	335567		0.824434	1.0551		0.15368	0.524831
P00338	>sp|P00338|LDHA_HUMAN L-lactate dehydrogenase A chain OS=Homo sapiens GN=LDHA PE=1 SV=2	12	12	12	12	12	12	12	12	12	12	12	12	144	187458	169890	189996	251100	174709	157483	173295	189573	185869	190056	207249	136798		199611	173765	179993	553369		1.10899	0.9654		0.432997	0.724364
P00352	>sp|P00352|AL1A1_HUMAN Retinal dehydrogenase 1 OS=Homo sapiens GN=ALDH1A1 PE=1 SV=2	26	26	26	26	26	26	26	26	26	26	26	26	312	484391	599139	485393	586454	585186	499444	507329	538579	579701	533568	495948	567166		538844	532635	544096	1.61557e+06		0.990348	0.978936		0.891198	0.686364
P00390	>sp|P00390|GSHR_HUMAN Glutathione reductase, mitochondrial OS=Homo sapiens GN=GSR PE=1 SV=2	12	12	12	12	12	12	12	12	12	12	12	12	144	1.41976e+06	1.52331e+06	1.56363e+06	1.97699e+06	1.62592e+06	1.57609e+06	1.61672e+06	1.65034e+06	1621142	1.57697e+06	1.71881e+06	1.82577e+06		1.62092e+06	1.61727e+06	1.68567e+06	4.92386e+06		0.961588	0.959419		0.654152	0.308704
P00441	>sp|P00441|SODC_HUMAN Superoxide dismutase [Cu-Zn] OS=Homo sapiens GN=SOD1 PE=1 SV=2	9	9	9	9	9	9	9	9	9	9	9	9	108	11334742	9669056	10914491	14866188	11621682	12171340	13104310	14634652	13415478	12408809	15991037	12775726		1.16961e+07	12882996	1.36478e+07	3.82269e+07		0.856999	0.943964		0.21061	0.492144
P00558	>sp|P00558|PGK1_HUMAN Phosphoglycerate kinase 1 OS=Homo sapiens GN=PGK1 PE=1 SV=3	21	21	21	21	21	21	21	21	21	21	21	21	252	13430.8	21639.5	13247.8	20925.3	15694.7	17802.6	19712.9	23601.6	16429.7	14271.9	17227.9	13863.9		17310.9	19203	15448.4	51962.2		1.12056	1.24304		0.490331	0.109279
P00491	>sp|P00491|PNPH_HUMAN Purine nucleoside phosphorylase OS=Homo sapiens GN=PNP PE=1 SV=2	17	17	17	17	17	17	17	17	17	17	17	17	204	271931	278292	296254	273395	242378	289723	261071	268721	259482	202843	233467	279181		279968	265473	243743	789185		1.14862	1.08915		0.112726	0.310794
P00492	>sp|P00492|HPRT_HUMAN Hypoxanthine-guanine phosphoribosyltransferase OS=Homo sapiens GN=HPRT1 PE=1 SV=2	11	11	11	11	11	11	11	11	11	11	11	11	132	1387705	1.43391e+06	1.592e+06	1.7406e+06	1.3867e+06	1.55357e+06	1372841	1.47658e+06	1.49328e+06	1.37575e+06	1.70985e+06	1400869		1.53855e+06	1.44742e+06	1.49494e+06	4.48091e+06		1.02918	0.968217		0.706851	0.609523
P00568;Q5T9B7	>sp|P00568|KAD1_HUMAN Adenylate kinase isoenzyme 1 OS=Homo sapiens GN=AK1 PE=1 SV=3;>tr|Q5T9B7|Q5T9B7_HUMAN Adenylate kinase isoenzyme 1 OS=Homo sapiens GN=AK1 PE=1 SV=1	8	8	8	8	8	8	8	8	8	8	8	8	96	404992	356971	623788	1.00292e+06	519891	492928	621717	540630	576876	18553.4	20050.5	618838		597168	543791	308580	1.44954e+06		1.93521	1.76224		0.243521	0.254935
P00915	>sp|P00915|CAH1_HUMAN Carbonic anhydrase 1 OS=Homo sapiens GN=CA1 PE=1 SV=2	24	24	24	24	24	24	24	24	24	24	24	24	288	4.73506e+06	4259488	4.18615e+06	3.61424e+06	4.26244e+06	4272558	4617491	4634558	3994530	4.4684e+06	4.49258e+06	4454743		4.19873e+06	4.44676e+06	4.35256e+06	1.29981e+07		0.964658	1.02164		0.581006	0.573783
P02533	>sp|P02533|K1C14_HUMAN Keratin, type I cytoskeletal 14 OS=Homo sapiens GN=KRT14 PE=1 SV=4	3	3	3	3	3	3	3	3	3	3	3	3	36	21806	19094.8	16525.8	16772	21401.1	21050.6	22133.3	18388.1	158020	422721	23216.7	16938		18549.6	20743.3	155224	194517		0.119502	0.133635		0.24551	0.251528
P02538;P48668	>sp|P02538|K2C6A_HUMAN Keratin, type II cytoskeletal 6A OS=Homo sapiens GN=KRT6A PE=1 SV=3;>sp|P48668|K2C6C_HUMAN Keratin, type II cytoskeletal 6C OS=Homo sapiens GN=KRT6C PE=1 SV=3	1	1	1	1	1	1	1	1	1	1	1	1	12	13191.1	21826.6	13773.9	19171.6	13467.3	17545.2	13099	27104.4	39233.8	141722	13113.6	14117.5		16990.8	17804	52046.6	86841.4		0.326453	0.342077		0.333932	0.343938
P00918	>sp|P00918|CAH2_HUMAN Carbonic anhydrase 2 OS=Homo sapiens GN=CA2 PE=1 SV=2	11	11	11	11	11	11	11	11	11	11	11	11	132	256108	253366	288309	234343	256843	280165	299556	295353	257395	256663	285940	246296		258032	282979	261574	802585		0.986459	1.08183		0.810091	0.148113
P02042	>sp|P02042|HBD_HUMAN Hemoglobin subunit delta OS=Homo sapiens GN=HBD PE=1 SV=2	16	16	16	16	16	16	16	16	16	16	16	16	192	419335968	522622688	487345056	680392896	473981440	501455296	448267904	623915776	462732352	703656000	280040896	474927424		527424152	511905104	480339168	1519668424		1.09802	1.06572		0.66609	0.755947
P02549	>sp|P02549|SPTA1_HUMAN Spectrin alpha chain, erythrocytic 1 OS=Homo sapiens GN=SPTA1 PE=1 SV=5	275	275	275	275	275	275	275	275	275	275	275	275	3300	407118	410631	415453	512537	472119	446678	463694	541562	523264	495749	548609	519929		436435	481013	521888	1.43934e+06		0.836262	0.92168		0.0358586	0.148909
P02730	>sp|P02730|B3AT_HUMAN Band 3 anion transport protein OS=Homo sapiens GN=SLC4A1 PE=1 SV=3	49	49	49	49	49	49	49	49	49	49	49	49	588	1.43513e+06	1.42021e+06	1596762	738094	1.59358e+06	1.43904e+06	1.54191e+06	1.48197e+06	1.44518e+06	1.63912e+06	1776835	1.90151e+06		1.29755e+06	1.51412e+06	1.69066e+06	4.50233e+06		0.76748	0.895581		0.132909	0.168869
P02768	>sp|P02768|ALBU_HUMAN Serum albumin OS=Homo sapiens GN=ALB PE=1 SV=2	42	42	42	42	42	42	42	42	42	42	42	42	504	242053	373981	249621	273097	263853	240284	233928	233190	266193	284380	262854	256462		284688	242814	267473	794974		1.06436	0.907809		0.615597	0.0399931
P04040	>sp|P04040|CATA_HUMAN Catalase OS=Homo sapiens GN=CAT PE=1 SV=3	29	29	29	29	29	29	29	29	29	29	29	29	348	14044377	16530101	13899736	17294496	15487550	14908879	14294422	14935937	16456584	15298408	14212038	16507485		1.54422e+07	14906697	1.56186e+07	4.59675e+07		0.988703	0.954418		0.869543	0.297195
P04083;Q5T3N0	>sp|P04083|ANXA1_HUMAN Annexin A1 OS=Homo sapiens GN=ANXA1 PE=1 SV=2;>tr|Q5T3N0|Q5T3N0_HUMAN Annexin (Fragment) OS=Homo sapiens GN=ANXA1 PE=1 SV=1	2	2	2	2	2	2	2	2	2	2	2	2	24	2.36974e+06	1.91019e+06	1.9712e+06	1.75656e+06	2.25714e+06	2.48577e+06	2.31477e+06	2186674	2.08153e+06	2375167	1.88904e+06	1.79142e+06		2.00192e+06	2.31109e+06	2.03429e+06	6.3473e+06		0.984088	1.13607		0.86567	0.119759
P04259	>sp|P04259|K2C6B_HUMAN Keratin, type II cytoskeletal 6B OS=Homo sapiens GN=KRT6B PE=1 SV=5	6	6	6	6	6	6	6	6	6	6	6	6	72	163168	72362.7	167169	276982	36590.4	98277.4	38194.6	127943	2197079	1.81941e+06	453225	161965		169920	75251.4	1.15792e+06	1.40309e+06		0.146746	0.0649884		0.142575	0.119098
P04264	>sp|P04264|K2C1_HUMAN Keratin, type II cytoskeletal 1 OS=Homo sapiens GN=KRT1 PE=1 SV=6	21	21	21	21	21	21	21	21	21	21	21	21	252	308345	76083.7	277010	461378	50087.9	157983	47777.3	250224	3.67138e+06	2.60094e+06	938019	295927		280704	126518	1.87657e+06	2.28379e+06		0.149584	0.0674202		0.12959	0.107565
P04350;P68371	>sp|P04350|TBB4A_HUMAN Tubulin beta-4A chain OS=Homo sapiens GN=TUBB4A PE=1 SV=2;>sp|P68371|TBB4B_HUMAN Tubulin beta-4B chain OS=Homo sapiens GN=TUBB4B PE=1 SV=1	5	5	5	5	5	5	5	5	5	5	5	5	60	37249.7	110030	110840	94338.1	1489644	137997	130988	26966.1	1.92741e+06	105535	136647	1.406e+06		88114.5	446399	893899	1.42841e+06		0.0985731	0.499384		0.177222	0.468907
P04406	>sp|P04406|G3P_HUMAN Glyceraldehyde-3-phosphate dehydrogenase OS=Homo sapiens GN=GAPDH PE=1 SV=3	29	29	29	29	29	29	29	29	29	29	29	29	348	8.1885e+06	8452636	8510195	8277559	8464469	8959089	9163431	8505976	8.00678e+06	8303026	8605616	8571890		8.35722e+06	8.77324e+06	8.37183e+06	2.55023e+07		0.998255	1.04795		0.930276	0.121349
P06703;R4GN98	>sp|P06703|S10A6_HUMAN Protein S100-A6 OS=Homo sapiens GN=S100A6 PE=1 SV=1;>tr|R4GN98|R4GN98_HUMAN Protein S100 (Fragment) OS=Homo sapiens GN=S100A6 PE=1 SV=1	8	8	8	8	8	8	8	8	8	8	8	8	96	162958	144970	257015	191070	125593	137520	142980	154634	140031	143855	151128	121919		189003	140182	139233	468418		1.35746	1.00681		0.133926	0.916344
P06733	>sp|P06733|ENOA_HUMAN Alpha-enolase OS=Homo sapiens GN=ENO1 PE=1 SV=2	16	16	16	16	16	16	16	16	16	16	16	16	192	2885256	2.87838e+06	2.71421e+06	2.55535e+06	3509780	2808207	3.26987e+06	2.82503e+06	3.37797e+06	2.84777e+06	2.68679e+06	3.19247e+06		2.7583e+06	3.10322e+06	3.02625e+06	8.88777e+06		0.911458	1.02544		0.196418	0.753256
P06753	>sp|P06753|TPM3_HUMAN Tropomyosin alpha-3 chain OS=Homo sapiens GN=TPM3 PE=1 SV=2	10	10	10	10	10	10	10	10	10	10	10	10	120	2.94766e+06	3.8197e+06	3.06706e+06	3.90182e+06	3.63635e+06	3232366	2.90401e+06	3524394	4069478	3751992	3.2371e+06	3.21833e+06		3.43406e+06	3324279	3.56923e+06	1.03276e+07		0.96213	0.931373		0.691058	0.391987
P07451	>sp|P07451|CAH3_HUMAN Carbonic anhydrase 3 OS=Homo sapiens GN=CA3 PE=1 SV=3	5	5	5	5	5	5	5	5	5	5	5	5	60	18913.2	29970.5	7432.86	13013.2	28937.4	14219.6	6453.21	12176.4	23023.2	26173.9	12456.1	6267.87		17332.4	15446.6	16980.3	49759.3		1.02074	0.909682		0.959655	0.825391
P07195	>sp|P07195|LDHB_HUMAN L-lactate dehydrogenase B chain OS=Homo sapiens GN=LDHB PE=1 SV=2	18	18	18	18	18	18	18	18	18	18	18	18	216	474655	515442	498596	569622	519082	570155	529607	481854	505792	495564	522927	563622		514579	525175	521976	1.56173e+06		0.985829	1.00613		0.779155	0.896533
P07384	>sp|P07384|CAN1_HUMAN Calpain-1 catalytic subunit OS=Homo sapiens GN=CAPN1 PE=1 SV=1	44	44	44	44	44	44	44	44	44	44	44	44	528	119549	121413	139943	58495.2	130737	132142	122847	141449	131818	116775	116480	146678		109850	131794	127938	369582		0.858624	1.03014		0.398466	0.657808
P08238	>sp|P08238|HS90B_HUMAN Heat shock protein HSP 90-beta OS=Homo sapiens GN=HSP90AB1 PE=1 SV=4	7	7	7	7	7	7	7	7	7	7	7	7	84	39335.6	36734.7	45685.3	42781.7	39068.6	48332.8	48653.5	41802.7	42589.7	35724.2	36878.1	49872.6		41134.3	44464.4	41266.2	126865		0.996806	1.0775		0.973574	0.459718
P08397	>sp|P08397|HEM3_HUMAN Porphobilinogen deaminase OS=Homo sapiens GN=HMBS PE=1 SV=2	12	12	12	12	12	12	12	12	12	12	12	12	144	18897.4	18999.2	21899.7	18169.1	19352.8	21614.9	26629.5	20706.1	20753.8	18532.5	24712.9	26139.2		19491.4	22075.8	22534.6	64101.8		0.864951	0.979639		0.18708	0.852685
P08779	>sp|P08779|K1C16_HUMAN Keratin, type I cytoskeletal 16 OS=Homo sapiens GN=KRT16 PE=1 SV=4	1	1	1	1	1	1	1	1	1	1	1	1	12	20473.8	12920.1	21378.3	29756.1	20902.5	27231.8	22128.8	13305.8	16818.9	194513	20353.6	21911.6		21132.1	20892.2	63399.3	105424		0.333317	0.329534		0.405436	0.402947
P09105	>sp|P09105|HBAT_HUMAN Hemoglobin subunit theta-1 OS=Homo sapiens GN=HBQ1 PE=1 SV=2	4	4	4	4	4	4	4	4	4	4	4	4	48	69758.9	43333.5	54359.9	54819.2	59162.9	63233.1	67271.9	53608.7	52393.3	68540.1	52757.5	73164.6		55567.9	60819.2	61713.9	178101		0.900412	0.985502		0.451048	0.889612
P07738	>sp|P07738|PMGE_HUMAN Bisphosphoglycerate mutase OS=Homo sapiens GN=BPGM PE=1 SV=2	12	12	12	12	12	12	12	12	12	12	12	12	144	348374	541523	486442	433346	530714	501885	529770	518113	538840	361521	387923	382986		452421	520121	417818	1.39036e+06		1.08282	1.24485		0.571835	0.0851166
P07900	>sp|P07900|HS90A_HUMAN Heat shock protein HSP 90-alpha OS=Homo sapiens GN=HSP90AA1 PE=1 SV=5	22	22	22	22	22	22	22	22	22	22	22	22	264	7369927	6939414	7019568	7.19274e+06	6564489	7343765	7033867	6995347	7266657	7803662	6832275	7228336		7.13041e+06	6984367	7.28273e+06	2.13975e+07		0.979085	0.959031		0.526452	0.28976
P10644	>sp|P10644|KAP0_HUMAN cAMP-dependent protein kinase type I-alpha regulatory subunit OS=Homo sapiens GN=PRKAR1A PE=1 SV=1	12	12	12	12	12	12	12	12	12	12	12	12	144	46528.5	90112	57060.6	33183.6	52252.3	64954.6	63905.9	47977.5	45687.9	86557.5	80088.5	74417.9		56721.2	57272.6	71688	185682		0.791223	0.798915		0.363908	0.217061
P09211	>sp|P09211|GSTP1_HUMAN Glutathione S-transferase P OS=Homo sapiens GN=GSTP1 PE=1 SV=2	12	12	12	12	12	12	12	12	12	12	12	12	144	313375	322554	303732	253934	311498	330488	321594	322756	307029	319986	306331	313555		298399	321584	311725	931708		0.957248	1.03163		0.452219	0.1002
P10599	>sp|P10599|THIO_HUMAN Thioredoxin OS=Homo sapiens GN=TXN PE=1 SV=3	5	5	5	5	5	5	5	5	5	5	5	5	60	851508	921860	824901	1.06042e+06	867795	723058	789016	738508	974668	887726	789681	986591		914673	779594	909667	2.60393e+06		1.0055	0.857011		0.945154	0.0641066
P11142	>sp|P11142|HSP7C_HUMAN Heat shock cognate 71 kDa protein OS=Homo sapiens GN=HSPA8 PE=1 SV=1	42	42	42	42	42	42	42	42	42	42	42	42	504	17538664	17117454	19930294	17049654	19405918	18394848	20849732	19729848	18431726	17248844	15493130	17657640		1.7909e+07	1.95951e+07	17207835	54711938		1.04075	1.13873		0.476602	0.0259464
P11166	>sp|P11166|GTR1_HUMAN Solute carrier family 2, facilitated glucose transporter member 1 OS=Homo sapiens GN=SLC2A1 PE=1 SV=2	17	17	17	17	17	17	17	17	17	17	17	17	204	333389	341234	352395	150612	362784	318736	359203	336835	288092	396381	370348	388098		294408	344389	360730	999527		0.816144	0.954702		0.280704	0.575865
P11171;Q4VB86	>sp|P11171|41_HUMAN Protein 4.1 OS=Homo sapiens GN=EPB41 PE=1 SV=4;>tr|Q4VB86|Q4VB86_HUMAN EPB41 protein OS=Homo sapiens GN=EPB41 PE=1 SV=2	22	22	22	22	22	22	22	22	22	22	22	22	264	5743521	6967406	6.13872e+06	8.14957e+06	6.68437e+06	6226632	5985303	6138863	6.70792e+06	6.79458e+06	6685590	6.16934e+06		6749805	6.25879e+06	6.58936e+06	1.9598e+07		1.02435	0.949834		0.78742	0.161211
P13489	>sp|P13489|RINI_HUMAN Ribonuclease inhibitor OS=Homo sapiens GN=RNH1 PE=1 SV=2	20	20	20	20	20	20	20	20	20	20	20	20	240	40548.5	43581.6	31986.1	31393	40610	37917	33843.8	46857.5	48804.4	36794.7	35621	39887.5		36877.3	39807.1	40276.9	116961		0.915595	0.988336		0.456596	0.911315
P11277	>sp|P11277|SPTB1_HUMAN Spectrin beta chain, erythrocytic OS=Homo sapiens GN=SPTB PE=1 SV=5	238	238	238	238	238	238	238	238	238	238	238	238	2856	729220	844917	720627	776454	890631	786442	830223	935051	873500	868791	920620	935061		767805	860587	899493	2.52788e+06		0.853597	0.956747		0.0111351	0.343602
P13647	>sp|P13647|K2C5_HUMAN Keratin, type II cytoskeletal 5 OS=Homo sapiens GN=KRT5 PE=1 SV=3	2	2	2	2	2	2	2	2	2	2	2	2	24	17412.8	17998.6	17291.7	17427.8	17429.8	22523.7	14554.6	19769.9	123361	170558	20483.6	17237.1		17532.7	18569.5	82909.7	119012		0.211468	0.223973		0.185684	0.19084
P12955	>sp|P12955|PEPD_HUMAN Xaa-Pro dipeptidase OS=Homo sapiens GN=PEPD PE=1 SV=3	9	9	9	9	9	9	9	9	9	9	9	9	108	92480.8	146604	88149.6	117613	96038.6	92621.1	92383.2	134553	121650	98762.3	104741	105334		111212	103899	107622	322733		1.03336	0.965406		0.815239	0.758546
P13796	>sp|P13796|PLSL_HUMAN Plastin-2 OS=Homo sapiens GN=LCP1 PE=1 SV=6	14	14	14	14	14	14	14	14	14	14	14	14	168	80144.3	92357.6	99083.6	115735	81779	92407	79093.4	88355.3	76562.8	88386.6	82816.9	88401.3		96830.1	85408.7	84041.9	266281		1.15216	1.01626		0.18528	0.752779
P13645	>sp|P13645|K1C10_HUMAN Keratin, type I cytoskeletal 10 OS=Homo sapiens GN=KRT10 PE=1 SV=6	17	17	17	17	17	17	17	17	17	17	17	17	204	143468	13734.9	167961	215453	25294.4	85508.7	41947	82146.3	1.25585e+06	493930	432032	173452		135154	58724.1	588816	782694		0.229536	0.0997325		0.145441	0.107091
P15531	>sp|P15531|NDKA_HUMAN Nucleoside diphosphate kinase A OS=Homo sapiens GN=NME1 PE=1 SV=1	1	1	1	1	1	1	1	1	1	1	1	1	12	28610.8	33482.5	31830	39369.4	32456.7	23154	30126.9	31166.6	33343.3	35397.1	30135.4	24805.9		33323.2	29226	30920.4	93469.6		1.07771	0.945202		0.484624	0.605323
P13716	>sp|P13716|HEM2_HUMAN Delta-aminolevulinic acid dehydratase OS=Homo sapiens GN=ALAD PE=1 SV=1	9	9	9	9	9	9	9	9	9	9	9	9	108	942925	979476	955492	1.19995e+06	1.01193e+06	1.092e+06	1059684	915909	941213	1.08943e+06	1.00205e+06	1.16396e+06		1.01946e+06	1.01988e+06	1.04916e+06	3.0885e+06		0.971691	0.972091		0.716668	0.655027
P14174	>sp|P14174|MIF_HUMAN Macrophage migration inhibitory factor OS=Homo sapiens GN=MIF PE=1 SV=4	3	3	3	3	3	3	3	3	3	3	3	3	36	338887	369451	379876	402789	321830	351535	332500	373441	321628	304536	359713	265966		372751	344827	312961	1.03054e+06		1.19105	1.10182		0.0492894	0.218161
P16083;Q5TD05;Q5TD07	>sp|P16083|NQO2_HUMAN Ribosyldihydronicotinamide dehydrogenase [quinone] OS=Homo sapiens GN=NQO2 PE=1 SV=5;>tr|Q5TD05|Q5TD05_HUMAN Ribosyldihydronicotinamide dehydrogenase [quinone] (Fragment) OS=Homo sapiens GN=NQO2 PE=1 SV=1;>tr|Q5TD07|Q5TD07_HUMAN Ribosyldihydronicotinamide dehydrogenase [quinone] OS=Homo sapiens GN=NQO2 PE=1 SV=1	2	2	2	2	2	2	2	2	2	2	2	2	24	100535	137027	99516.5	145008	118591	99879	97022.6	112087	113236	104498	107934	93412.9		120522	106895	104770	332187		1.15034	1.02028		0.285948	0.758468
P16157	>sp|P16157|ANK1_HUMAN Ankyrin-1 OS=Homo sapiens GN=ANK1 PE=1 SV=3	123	123	123	123	123	123	123	123	123	123	123	123	1476	9782378	10439531	10945953	13455784	10972325	10527215	10466456	11418003	11711655	10919214	10578124	11012401		1.11559e+07	1.0846e+07	1.10553e+07	3.30573e+07		1.0091	0.981064		0.910929	0.543446
P16452	>sp|P16452|EPB42_HUMAN Erythrocyte membrane protein band 4.2 OS=Homo sapiens GN=EPB42 PE=1 SV=3	51	51	51	51	51	51	51	51	51	51	51	51	612	125358	146561	154938	34518.8	141677	114622	133175	137032	111457	153480	79545.5	131080		115344	131627	118890	365861		0.970171	1.10712		0.915725	0.491228
P17174	>sp|P17174|AATC_HUMAN Aspartate aminotransferase, cytoplasmic OS=Homo sapiens GN=GOT1 PE=1 SV=3	11	11	11	11	11	11	11	11	11	11	11	11	132	170874	202928	171422	199388	212709	177468	185192	176228	195505	192501	192047	205743		186153	187899	196449	570501		0.947587	0.956478		0.331674	0.402076
P19320	>sp|P19320|VCAM1_HUMAN Vascular cell adhesion protein 1 OS=Homo sapiens GN=VCAM1 PE=1 SV=1	1	1	1	1	1	1	1	1	1	1	1	1	12	143607	152085	150160	189597	139176	135901	147346	133150	142678	149333	144040	141863		158862	138893	144479	442234		1.09956	0.96134		0.261468	0.176213
P17987	>sp|P17987|TCPA_HUMAN T-complex protein 1 subunit alpha OS=Homo sapiens GN=TCP1 PE=1 SV=1	22	22	22	22	22	22	22	22	22	22	22	22	264	209251	184388	127865	251737	21476.8	221338	166538	173927	13749.1	259351	17019.3	15929.9		193310	145820	76512.4	415642		2.52652	1.90583		0.151676	0.393051
P21980	>sp|P21980|TGM2_HUMAN Protein-glutamine gamma-glutamyltransferase 2 OS=Homo sapiens GN=TGM2 PE=1 SV=2	19	19	19	19	19	19	19	19	19	19	19	19	228	97430.9	123924	99319	100829	100899	80171.7	92640.7	100392	116096	104465	81110.6	91280.1		105376	93525.7	98238.2	297140		1.07266	0.95203		0.49697	0.624014
P22234	>sp|P22234|PUR6_HUMAN Multifunctional protein ADE2 OS=Homo sapiens GN=PAICS PE=1 SV=3	15	15	15	15	15	15	15	15	15	15	15	15	180	26564.1	28040.3	34913.1	25079.9	32588.6	26277.9	24348.9	22286	17018.3	19721.2	17674.2	27889.1		28649.4	26375.3	20575.7	75600.4		1.39239	1.28187		0.05166	0.134887
P22314	>sp|P22314|UBA1_HUMAN Ubiquitin-like modifier-activating enzyme 1 OS=Homo sapiens GN=UBA1 PE=1 SV=3	27	27	27	27	27	27	27	27	27	27	27	27	324	31378.7	34596.1	64923	87694.9	78445.7	68721.8	71154.9	109258	101774	37215.4	90443	75696.3		54648.2	81895.1	76282.1	212825		0.716396	1.07358		0.307647	0.752691
P18206	>sp|P18206|VINC_HUMAN Vinculin OS=Homo sapiens GN=VCL PE=1 SV=4	4	4	4	4	4	4	4	4	4	4	4	4	48	330549	362396	292880	231032	289391	243242	286830	412961	334148	326390	313578	178230		304214	308106	288087	900407		1.05598	1.06949		0.740972	0.712956
P20618	>sp|P20618|PSB1_HUMAN Proteasome subunit beta type-1 OS=Homo sapiens GN=PSMB1 PE=1 SV=2	8	8	8	8	8	8	8	8	8	8	8	8	96	584945	547385	544827	561964	561970	584354	534487	538778	536208	532176	542196	567167		559780	554897	544437	1.65911e+06		1.02818	1.01921		0.25262	0.485204
P22392;Q32Q12	>sp|P22392|NDKB_HUMAN Nucleoside diphosphate kinase B OS=Homo sapiens GN=NME2 PE=1 SV=1;>tr|Q32Q12|Q32Q12_HUMAN Nucleoside diphosphate kinase OS=Homo sapiens GN=NME1-NME2 PE=1 SV=1	5	5	5	5	5	5	5	5	5	5	5	5	60	223719	236120	233764	265405	227354	188731	226359	206132	231291	237685	219523	207363		239752	212144	223965	675861		1.07049	0.947218		0.211666	0.342704
P23526	>sp|P23526|SAHH_HUMAN Adenosylhomocysteinase OS=Homo sapiens GN=AHCY PE=1 SV=4	16	16	16	16	16	16	16	16	16	16	16	16	192	390886	403221	386013	302808	371927	388737	397333	369035	305816	368730	352243	399403		370732	381758	356548	1.10904e+06		1.03978	1.07071		0.654726	0.294406
P23634	>sp|P23634|AT2B4_HUMAN Plasma membrane calcium-transporting ATPase 4 OS=Homo sapiens GN=ATP2B4 PE=1 SV=2	21	21	21	21	21	21	21	21	21	21	21	21	252	137979	3000421	2597984	2.76704e+06	3.28395e+06	135218	124751	2687921	3608357	3.04854e+06	148671	144682		2.12586e+06	1.55796e+06	1.73756e+06	5.42138e+06		1.22347	0.896636		0.746401	0.890111
P25786	>sp|P25786|PSA1_HUMAN Proteasome subunit alpha type-1 OS=Homo sapiens GN=PSMA1 PE=1 SV=1	9	9	9	9	9	9	9	9	9	9	9	9	108	843961	844011	672983	818886	883187	803192	785267	766412	855319	844610	853068	896530		794960	809515	862382	2.46686e+06		0.921819	0.938696		0.199984	0.130881
P26447	>sp|P26447|S10A4_HUMAN Protein S100-A4 OS=Homo sapiens GN=S100A4 PE=1 SV=1	6	6	6	6	6	6	6	6	6	6	6	6	72	92819.2	104600	102632	104773	102249	94209.1	98904	99677.9	107704	90452.6	98029.2	97034.4		101206	98760	98305.2	298271		1.02951	1.00463		0.548331	0.913126
P25788	>sp|P25788|PSA3_HUMAN Proteasome subunit alpha type-3 OS=Homo sapiens GN=PSMA3 PE=1 SV=2	6	6	6	6	6	6	6	6	6	6	6	6	72	345442	343020	307065	343218	345135	362208	340821	278259	297222	283263	340058	361567		334686	331606	320528	986819		1.04417	1.03456		0.523245	0.683747
P27348	>sp|P27348|1433T_HUMAN 14-3-3 protein theta OS=Homo sapiens GN=YWHAQ PE=1 SV=1	8	8	8	8	8	8	8	8	8	8	8	8	96	32559.7	24990.5	23965.4	32461.3	31393.9	32727.8	27396.9	21416.4	26295	22578.9	24482.8	31320.2		28494.2	28233.8	26169.2	82897.2		1.08884	1.07889		0.46774	0.539459
P25789	>sp|P25789|PSA4_HUMAN Proteasome subunit alpha type-4 OS=Homo sapiens GN=PSMA4 PE=1 SV=1	9	9	9	9	9	9	9	9	9	9	9	9	108	449919	451963	418714	437177	446561	436773	398309	402521	414181	395389	365067	401011		439443	421041	393912	1.2544e+06		1.11559	1.06887		0.0142404	0.141065
P27105	>sp|P27105|STOM_HUMAN Erythrocyte band 7 integral membrane protein OS=Homo sapiens GN=STOM PE=1 SV=3	27	27	27	27	27	27	27	27	27	27	27	27	324	156996	149585	142613	44253.2	153577	134096	133633	158307	127525	173706	100964	131089		123362	144903	133321	401586		0.925299	1.08687		0.757931	0.517665
P28066	>sp|P28066|PSA5_HUMAN Proteasome subunit alpha type-5 OS=Homo sapiens GN=PSMA5 PE=1 SV=3	9	9	9	9	9	9	9	9	9	9	9	9	108	382793	423558	368978	399453	426109	414240	354196	355867	487350	435665	436608	386123		393695	387603	436437	1.21773e+06		0.902067	0.888108		0.135065	0.132668
P28070	>sp|P28070|PSB4_HUMAN Proteasome subunit beta type-4 OS=Homo sapiens GN=PSMB4 PE=1 SV=4	3	3	3	3	3	3	3	3	3	3	3	3	36	159694	155636	106630	130335	146386	148687	136940	103346	114209	120720	136366	144070		138074	133840	128841	400755		1.07166	1.03879		0.543858	0.706008
P28072	>sp|P28072|PSB6_HUMAN Proteasome subunit beta type-6 OS=Homo sapiens GN=PSMB6 PE=1 SV=4	2	2	2	2	2	2	2	2	2	2	2	2	24	660962	650424	564392	678471	684126	693956	637779	609301	653567	675558	632763	714459		638562	656290	669087	1.96394e+06		0.954379	0.980875		0.364834	0.646142
P29144;Q5VZU9	>sp|P29144|TPP2_HUMAN Tripeptidyl-peptidase 2 OS=Homo sapiens GN=TPP2 PE=1 SV=4;>tr|Q5VZU9|Q5VZU9_HUMAN Tripeptidyl-peptidase 2 OS=Homo sapiens GN=TPP2 PE=1 SV=1	13	13	13	13	13	13	13	13	13	13	13	13	156	38386.9	70535.9	33749.8	29281.6	68426.4	55773.7	58879.2	63183.5	76661.8	67333.1	58185.8	31450.7		42988.6	61565.7	58407.9	162962		0.736006	1.05406		0.297558	0.772925
P29401	>sp|P29401|TKT_HUMAN Transketolase OS=Homo sapiens GN=TKT PE=1 SV=3	9	9	9	9	9	9	9	9	9	9	9	9	108	49495.6	15159.4	55120.5	56235.2	52431.9	47399.6	86671.6	21135.2	20213.4	70584.1	22160	61294.2		44002.7	51909.6	43562.9	139475		1.01009	1.1916		0.979407	0.672018
P28074	>sp|P28074|PSB5_HUMAN Proteasome subunit beta type-5 OS=Homo sapiens GN=PSMB5 PE=1 SV=3	7	7	7	7	7	7	7	7	7	7	7	7	84	176011	166508	170027	183580	184343	172151	181925	174743	165497	176799	189985	170639		174032	178290	175730	528052		0.990336	1.01457		0.802741	0.68964
P28289	>sp|P28289|TMOD1_HUMAN Tropomodulin-1 OS=Homo sapiens GN=TMOD1 PE=1 SV=1	36	36	36	36	36	36	36	36	36	36	36	36	432	1.33751e+06	1.40614e+06	1.2578e+06	1.57932e+06	1.42138e+06	1318498	1.38959e+06	1.31025e+06	1.46174e+06	1.48584e+06	1551713	1.59e+06		1.39519e+06	1.35993e+06	1.52232e+06	4.27744e+06		0.916488	0.893324		0.161919	0.00681733
P30041	>sp|P30041|PRDX6_HUMAN Peroxiredoxin-6 OS=Homo sapiens GN=PRDX6 PE=1 SV=3	24	24	24	24	24	24	24	24	24	24	24	24	288	419524	476957	478604	568979	393485	414276	410719	406697	417868	426789	377341	463888		486016	406294	421472	1.31378e+06		1.15314	0.96399		0.132325	0.462123
P30153	>sp|P30153|2AAA_HUMAN Serine/threonine-protein phosphatase 2A 65 kDa regulatory subunit A alpha isoform OS=Homo sapiens GN=PPP2R1A PE=1 SV=4	24	24	24	24	24	24	24	24	24	24	24	24	288	25159.9	25265.3	23773.2	28465.9	16609	28201.5	28896	41011.5	26478.4	27563.4	28476.3	13146.9		25666.1	28679.5	23916.3	78261.8		1.07316	1.19916		0.668434	0.471145
P30613	>sp|P30613|KPYR_HUMAN Pyruvate kinase PKLR OS=Homo sapiens GN=PKLR PE=1 SV=2	23	23	23	23	23	23	23	23	23	23	23	23	276	60051.6	59911.1	71044.4	71863.2	61661.6	68901	71794.4	65942.6	64954.3	71186.1	52157.2	74121.3		65717.6	67074.9	65604.7	198397		1.00172	1.02241		0.985428	0.795973
P30740	>sp|P30740|ILEU_HUMAN Leukocyte elastase inhibitor OS=Homo sapiens GN=SERPINB1 PE=1 SV=1	9	9	9	9	9	9	9	9	9	9	9	9	108	57690.3	40133.4	47128.7	55143.1	49201.4	38478.3	50957.7	42768.6	36211.7	49017.4	51260.1	46232.2		50023.9	45351.5	45680.4	141056		1.09508	0.992801		0.43585	0.942907
P31939	>sp|P31939|PUR9_HUMAN Bifunctional purine biosynthesis protein PURH OS=Homo sapiens GN=ATIC PE=1 SV=3	24	24	24	24	24	24	24	24	24	24	24	24	288	31739.3	43748.2	41346.6	31998.4	69991.8	81008.9	41093.9	78565.9	45048.2	46452.4	76205.1	43782		37208.1	67665.1	52871.9	157745		0.703741	1.27979		0.136733	0.26611
P31948	>sp|P31948|STIP1_HUMAN Stress-induced-phosphoprotein 1 OS=Homo sapiens GN=STIP1 PE=1 SV=1	20	20	20	20	20	20	20	20	20	20	20	20	240	89332	91618.4	90865.3	114094	100645	40267.5	95029.2	86092.2	91151	97016.7	103370	88597.8		96477.4	80508.4	95033.9	272020		1.01519	0.847155		0.839569	0.372583
P30043	>sp|P30043|BLVRB_HUMAN Flavin reductase (NADPH) OS=Homo sapiens GN=BLVRB PE=1 SV=3	15	15	15	15	15	15	15	15	15	15	15	15	180	2877283	2869236	3096086	3.28822e+06	3.09016e+06	2.74524e+06	3.22138e+06	2.79414e+06	3.28313e+06	3.31429e+06	3.16939e+06	2.77378e+06		3.03271e+06	2.96273e+06	3.13514e+06	9.13058e+06		0.967326	0.945006		0.545921	0.348443
P30085;Q5T0D2	>sp|P30085|KCY_HUMAN UMP-CMP kinase OS=Homo sapiens GN=CMPK1 PE=1 SV=3;>tr|Q5T0D2|Q5T0D2_HUMAN UMP-CMP kinase OS=Homo sapiens GN=CMPK1 PE=1 SV=1	3	3	3	3	3	3	3	3	3	3	3	3	36	569438	649703	649710	519313	551928	615099	641546	652970	605363	551694	495837	569260		597041	615386	555539	1.76797e+06		1.07471	1.10773		0.336548	0.111651
P35579	>sp|P35579|MYH9_HUMAN Myosin-9 OS=Homo sapiens GN=MYH9 PE=1 SV=4	22	22	22	22	22	22	22	22	22	22	22	22	264	21190.4	24332.5	25186.3	12911.1	21630.6	18227.3	23265.3	23249.8	21547.4	63677.8	21062.6	19306.9		20905.1	21593.3	31398.7	73897		0.665795	0.687713		0.407699	0.430773
P32119	>sp|P32119|PRDX2_HUMAN Peroxiredoxin-2 OS=Homo sapiens GN=PRDX2 PE=1 SV=5	18	18	18	18	18	18	18	18	18	18	18	18	216	27147310	32522230	28076182	22949170	31322118	30760756	30612140	33811412	29752372	31575136	34800704	22905414		27673723	3.16266e+07	2.97584e+07	89058736		0.929946	1.06278		0.538759	0.520083
P35527	>sp|P35527|K1C9_HUMAN Keratin, type I cytoskeletal 9 OS=Homo sapiens GN=KRT9 PE=1 SV=3	10	10	10	10	10	10	10	10	10	10	10	10	120	23216.7	23148.6	196530	58525.9	16428.1	26651.6	26727.4	201475	1.16907e+06	2.01009e+06	328335	28995		75355.4	67820.5	884121	1.0273e+06		0.085232	0.0767095		0.167309	0.164453
P35612	>sp|P35612|ADDB_HUMAN Beta-adducin OS=Homo sapiens GN=ADD2 PE=1 SV=3	51	51	51	51	51	51	51	51	51	51	51	51	612	1.3506e+06	1.51291e+06	1797960	1.32085e+06	1.66084e+06	1.58209e+06	1.09287e+06	1769522	1.53766e+06	1.59787e+06	1250695	1537184		1.49558e+06	1.52633e+06	1.48085e+06	4.50276e+06		1.00995	1.03071		0.916591	0.799271
P35754	>sp|P35754|GLRX1_HUMAN Glutaredoxin-1 OS=Homo sapiens GN=GLRX PE=1 SV=2	5	5	5	5	5	5	5	5	5	5	5	5	60	4.13097e+06	4518643	4.53422e+06	6183642	4524992	3.63272e+06	4328560	5020538	5779229	5002779	4.94944e+06	4574912		4.84187e+06	4.3767e+06	5.07659e+06	1.42952e+07		0.953764	0.862134		0.673107	0.118141
P35908	>sp|P35908|K22E_HUMAN Keratin, type II cytoskeletal 2 epidermal OS=Homo sapiens GN=KRT2 PE=1 SV=2	15	15	15	15	15	15	15	15	15	15	15	15	180	72918.7	25129.7	71446.9	107517	22172.6	45881.4	24142.5	24561.6	640761	231871	227077	95864.9		69253	29189.5	298893	397336		0.231698	0.0976586		0.146613	0.106679
P35998	>sp|P35998|PRS7_HUMAN 26S proteasome regulatory subunit 7 OS=Homo sapiens GN=PSMC2 PE=1 SV=3	17	17	17	17	17	17	17	17	17	17	17	17	204	140393	154436	137845	127967	166479	132068	144052	177451	151381	159053	142931	127940		140160	155013	145326	440499		0.964453	1.06665		0.571569	0.465712
P38606	>sp|P38606|VATA_HUMAN V-type proton ATPase catalytic subunit A OS=Homo sapiens GN=ATP6V1A PE=1 SV=2	12	12	12	12	12	12	12	12	12	12	12	12	144	93416.5	94852	98601.7	89735.5	83632.6	76377.5	83124.9	84471.2	103369	80066	93479.5	79201.7		94151.4	81901.5	89029.2	265082		1.05753	0.919941		0.451477	0.312692
P40227	>sp|P40227|TCPZ_HUMAN T-complex protein 1 subunit zeta OS=Homo sapiens GN=CCT6A PE=1 SV=3	14	14	14	14	14	14	14	14	14	14	14	14	168	70631.5	54343.3	64751.3	17809.5	25644.9	80007.1	82499.2	75577.2	20844.2	167134	68769.8	19952.8		51883.9	65932.1	69175.1	186991		0.750037	0.953118		0.662814	0.934705
P40925	>sp|P40925|MDHC_HUMAN Malate dehydrogenase, cytoplasmic OS=Homo sapiens GN=MDH1 PE=1 SV=4	14	14	14	14	14	14	14	14	14	14	14	14	168	92235.5	93811.1	74619.6	59179.3	82125.8	76541.9	82524.6	78839.2	77915.7	87301.2	85935.7	66023.7		79961.4	80007.9	79294.1	239263		1.00842	1.009		0.946929	0.89608
P41091	>sp|P41091|IF2G_HUMAN Eukaryotic translation initiation factor 2 subunit 3 OS=Homo sapiens GN=EIF2S3 PE=1 SV=3	9	9	9	9	9	9	9	9	9	9	9	9	108	75413.2	114347	67989.2	85029	72774.5	50658.8	59371.2	89415.5	108851	83115.5	83032.6	69236.6		85694.5	68055	86058.9	239808		0.995766	0.790795		0.978757	0.178605
P36959	>sp|P36959|GMPR1_HUMAN GMP reductase 1 OS=Homo sapiens GN=GMPR PE=1 SV=1	10	10	10	10	10	10	10	10	10	10	10	10	120	393037	444814	341583	441468	355999	406028	393726	429095	429704	561795	424229	424240		405226	396212	459992	1.26143e+06		0.880942	0.861346		0.242312	0.15904
P45974	>sp|P45974|UBP5_HUMAN Ubiquitin carboxyl-terminal hydrolase 5 OS=Homo sapiens GN=USP5 PE=1 SV=2	20	20	20	20	20	20	20	20	20	20	20	20	240	95165.6	96041.9	83000.7	91000.4	80227	97604.4	86669.8	88830.7	104351	89704.7	101510	111743		91302.2	88333	101827	281462		0.896639	0.86748		0.110285	0.0619972
P48147	>sp|P48147|PPCE_HUMAN Prolyl endopeptidase OS=Homo sapiens GN=PREP PE=1 SV=2	8	8	8	8	8	8	8	8	8	8	8	8	96	22237.4	27840	26880.4	12806.4	26344.4	36532.7	29293.1	29288.2	22657.2	29531.1	30838.3	17391.1		22441.1	30364.6	25104.4	77910.1		0.893909	1.20953		0.587926	0.222733
P48426	>sp|P48426|PI42A_HUMAN Phosphatidylinositol 5-phosphate 4-kinase type-2 alpha OS=Homo sapiens GN=PIP4K2A PE=1 SV=2	8	8	8	8	8	8	8	8	8	8	8	8	96	43847.7	39995	44870.2	75887.8	45046.3	38869.7	43279.9	62546.9	45286.1	42199.8	36441.8	38794.9		51150.2	47435.7	40680.6	139266		1.25736	1.16605		0.299674	0.293484
P37837	>sp|P37837|TALDO_HUMAN Transaldolase OS=Homo sapiens GN=TALDO1 PE=1 SV=2	13	13	13	13	13	13	13	13	13	13	13	13	156	1295258	1.49647e+06	1.34315e+06	1.57819e+06	1.26148e+06	1.21788e+06	1.25316e+06	1.3848e+06	1.41917e+06	1.29493e+06	1305179	1.31163e+06		1.42827e+06	1.27933e+06	1.33273e+06	4.04032e+06		1.07169	0.959933		0.253143	0.2971
P48741	>sp|P48741|HSP77_HUMAN Putative heat shock 70 kDa protein 7 OS=Homo sapiens GN=HSPA7 PE=5 SV=2	1	1	1	1	1	1	1	1	1	1	1	1	12	722772	750344	726993	699186	713690	593804	675194	820930	709166	754979	716359	542286		724824	700905	680697	2.10643e+06		1.06483	1.02969		0.423374	0.7723
P43686	>sp|P43686|PRS6B_HUMAN 26S proteasome regulatory subunit 6B OS=Homo sapiens GN=PSMC4 PE=1 SV=2	16	16	16	16	16	16	16	16	16	16	16	16	192	456716	497755	434628	501310	540930	480264	502104	453857	504856	499172	500758	648328		472602	494289	538279	1.50517e+06		0.877988	0.918276		0.174789	0.339008
P48637	>sp|P48637|GSHB_HUMAN Glutathione synthetase OS=Homo sapiens GN=GSS PE=1 SV=1	14	14	14	14	14	14	14	14	14	14	14	14	168	412199	473414	471708	454698	457064	451187	434764	446970	430095	451131	385804	480865		453005	447496	436974	1.33747e+06		1.03669	1.02408		0.54029	0.640397
P49247	>sp|P49247|RPIA_HUMAN Ribose-5-phosphate isomerase OS=Homo sapiens GN=RPIA PE=1 SV=3	8	8	8	8	8	8	8	8	8	8	8	8	96	120728	116413	176891	182897	124412	156919	148729	91641.7	120508	129304	123515	171362		149232	130425	136172	415830		1.09591	0.957798		0.566638	0.771309
P50395	>sp|P50395|GDIB_HUMAN Rab GDP dissociation inhibitor beta OS=Homo sapiens GN=GDI2 PE=1 SV=2	26	26	26	26	26	26	26	26	26	26	26	26	312	50659.7	37854.9	43797.5	41938.7	52349.8	53475.3	54636.4	58794.3	51639.1	28367.5	59858	51198.3		43562.7	54814	47765.7	146142		0.912007	1.14756		0.595005	0.377401
P49454	>sp|P49454|CENPF_HUMAN Centromere protein F OS=Homo sapiens GN=CENPF PE=1 SV=2	2	2	2	2	2	2	2	2	2	2	2	2	24	144250	173944	135969	184349	149184	139799	125276	141028	170431	165124	139987	135497		159628	138822	152760	451209		1.04496	0.908759		0.654634	0.228907
P50570	>sp|P50570|DYN2_HUMAN Dynamin-2 OS=Homo sapiens GN=DNM2 PE=1 SV=2	11	11	11	11	11	11	11	11	11	11	11	11	132	23455.4	30013.1	209162	25149.3	22249.5	36058.6	30744.5	28495.3	21707.5	23186.4	27482.9	27799		71944.9	29387	25044	126376		2.87275	1.17342		0.3809	0.243007
P49721	>sp|P49721|PSB2_HUMAN Proteasome subunit beta type-2 OS=Homo sapiens GN=PSMB2 PE=1 SV=1	7	7	7	7	7	7	7	7	7	7	7	7	84	921487	569998	739721	805142	761160	891492	826246	860868	813505	646550	943018	936266		759087	834941	834835	2.42886e+06		0.909266	1.00013		0.481903	0.998932
P50991	>sp|P50991|TCPD_HUMAN T-complex protein 1 subunit delta OS=Homo sapiens GN=CCT4 PE=1 SV=4	16	16	16	16	16	16	16	16	16	16	16	16	192	46833.4	48678.2	47282	45943.9	58231.3	54205	57859.8	43953	35794.7	31904.2	44364.3	61806.7		47184.4	53562.3	43467.5	144214		1.08551	1.23224		0.615626	0.239586
P50502	>sp|P50502|F10A1_HUMAN Hsc70-interacting protein OS=Homo sapiens GN=ST13 PE=1 SV=2	8	8	8	8	8	8	8	8	8	8	8	8	96	521732	589736	547606	649948	563395	557264	536017	564379	557218	583659	550721	614802		577255	555264	576600	1.70912e+06		1.00114	0.962996		0.984318	0.250797
P51665	>sp|P51665|PSMD7_HUMAN 26S proteasome non-ATPase regulatory subunit 7 OS=Homo sapiens GN=PSMD7 PE=1 SV=2	8	8	8	8	8	8	8	8	8	8	8	8	96	25066.5	142239	20071.2	23650	20528.1	27294.8	26382.8	20976.6	15957.8	24841.8	18906.8	28017.5		52756.7	23795.6	21931	98483.2		2.40558	1.08502		0.37825	0.592034
P52209	>sp|P52209|6PGD_HUMAN 6-phosphogluconate dehydrogenase, decarboxylating OS=Homo sapiens GN=PGD PE=1 SV=3	10	10	10	10	10	10	10	10	10	10	10	10	120	20638.7	27150.6	21644.2	23416.5	32463.2	24791.1	25201.5	24247	31848.6	24932.9	32324.9	24818.4		23212.5	26675.7	28481.2	78369.4		0.815011	0.936608		0.088336	0.549432
P53396	>sp|P53396|ACLY_HUMAN ATP-citrate synthase OS=Homo sapiens GN=ACLY PE=1 SV=3	32	32	32	32	32	32	32	32	32	32	32	32	384	29672.8	34299	34268.2	21033.8	33914.1	30690.9	35168	39077	21066.2	31539	30807.3	25881.2		29818.4	34712.5	27323.5	91854.4		1.09131	1.27043		0.553246	0.0526116
P50990	>sp|P50990|TCPQ_HUMAN T-complex protein 1 subunit theta OS=Homo sapiens GN=CCT8 PE=1 SV=4	15	15	15	15	15	15	15	15	15	15	15	15	180	206238	239003	223197	239762	245525	239687	237644	235816	249946	201868	247185	243637		227050	239668	235659	702377		0.963468	1.01701		0.5591	0.749674
P55060	>sp|P55060|XPO2_HUMAN Exportin-2 OS=Homo sapiens GN=CSE1L PE=1 SV=3	11	11	11	11	11	11	11	11	11	11	11	11	132	53183.2	73490.3	99242	93212.3	57765.7	19055.5	20907.9	97295.8	49708	53342.2	14242.5	16388.9		79782	48756.2	33420.4	161959		2.38722	1.45888		0.0202246	0.504277
P51149	>sp|P51149|RAB7A_HUMAN Ras-related protein Rab-7a OS=Homo sapiens GN=RAB7A PE=1 SV=1	11	11	11	11	11	11	11	11	11	11	11	11	132	467248	483795	511978	374048	506376	546988	541733	505926	421870	482381	462837	529976		459267	525256	474266	1.45879e+06		0.968374	1.10751		0.703036	0.105222
P54725	>sp|P54725|RD23A_HUMAN UV excision repair protein RAD23 homolog A OS=Homo sapiens GN=RAD23A PE=1 SV=1	9	9	9	9	9	9	9	9	9	9	9	9	108	76340.3	90787.7	127037	134007	104540	81728.4	95062.8	123180	121564	102571	91590.5	107524		107043	101128	105812	313983		1.01163	0.955729		0.9395	0.678528
P55072	>sp|P55072|TERA_HUMAN Transitional endoplasmic reticulum ATPase OS=Homo sapiens GN=VCP PE=1 SV=4	36	36	36	36	36	36	36	36	36	36	36	36	432	1859180	2.11275e+06	1.79826e+06	1.96963e+06	1.99194e+06	1.96533e+06	1.94691e+06	1.96473e+06	1.87277e+06	1.92732e+06	2.053e+06	2.14692e+06		1.93495e+06	1.96723e+06	2000003	5.90218e+06		0.967475	0.983613		0.509411	0.634905
P60891	>sp|P60891|PRPS1_HUMAN Ribose-phosphate pyrophosphokinase 1 OS=Homo sapiens GN=PRPS1 PE=1 SV=2	9	9	9	9	9	9	9	9	9	9	9	9	108	30919.6	22455.6	30686.1	17041.5	30772.6	21374.9	22144.1	23211.4	17768.5	16628.9	25511	16054.4		25275.7	24375.8	18990.7	68642.2		1.33095	1.28356		0.177987	0.131871
P61026	>sp|P61026|RAB10_HUMAN Ras-related protein Rab-10 OS=Homo sapiens GN=RAB10 PE=1 SV=1	1	1	1	1	1	1	1	1	1	1	1	1	12	30046.2	32599	29615.6	11760	32045.6	35235.2	36995.2	43337.1	31032.6	25450.8	51316.4	42950.7		26005.2	36903.3	37687.6	100596		0.690019	0.979188		0.174352	0.906865
P61225	>sp|P61225|RAP2B_HUMAN Ras-related protein Rap-2b OS=Homo sapiens GN=RAP2B PE=1 SV=1	13	13	13	13	13	13	13	13	13	13	13	13	156	95035.4	58747.1	93812	62540.5	103244	82968.2	88579.2	90762.6	83819.6	93008.2	95819.7	91307.5		77533.8	91388.4	90988.8	259911		0.852125	1.00439		0.265453	0.939315
P61812	>sp|P61812|TGFB2_HUMAN Transforming growth factor beta-2 OS=Homo sapiens GN=TGFB2 PE=1 SV=1	1	1	1	1	1	1	1	1	1	1	1	1	12	118240	156660	135736	156860	125491	127406	126858	138151	156919	140716	125797	144903		141874	129477	142084	413434		0.998521	0.911269		0.985854	0.145278
P60174	>sp|P60174|TPIS_HUMAN Triosephosphate isomerase OS=Homo sapiens GN=TPI1 PE=1 SV=3	14	14	14	14	14	14	14	14	14	14	14	14	168	2.70314e+06	3.04714e+06	2.59266e+06	3.49164e+06	2937898	2.73894e+06	2733955	2.63416e+06	3.14967e+06	3.23673e+06	2.95657e+06	2.91031e+06		2.95864e+06	2.76124e+06	3063322	8.7832e+06		0.965828	0.901386		0.655129	0.0248588
P61981	>sp|P61981|1433G_HUMAN 14-3-3 protein gamma OS=Homo sapiens GN=YWHAG PE=1 SV=2	6	6	6	6	6	6	6	6	6	6	6	6	72	67521.2	84780.8	60864.4	72863.2	64065.7	69462.6	64201.7	59974.1	82468	74707.5	58247	60300.9		71507.4	64426	68930.9	204864		1.03738	0.934647		0.749672	0.506529
P60709	>sp|P60709|ACTB_HUMAN Actin, cytoplasmic 1 OS=Homo sapiens GN=ACTB PE=1 SV=1	37	37	37	37	37	37	37	37	37	37	37	37	444	1.06819e+06	1.15108e+06	1.08133e+06	1.13714e+06	1.17701e+06	1.14061e+06	1.1607e+06	1.10043e+06	1.10153e+06	1.18521e+06	1176669	1.20142e+06		1109436	1.14469e+06	1.16621e+06	3.42033e+06		0.95132	0.981548		0.108777	0.46822
P61970	>sp|P61970|NTF2_HUMAN Nuclear transport factor 2 OS=Homo sapiens GN=NUTF2 PE=1 SV=1	6	6	6	6	6	6	6	6	6	6	6	6	72	1.46151e+06	2.01873e+06	1.73741e+06	2.11147e+06	1.81106e+06	1.65825e+06	1.64493e+06	1.76445e+06	1.81264e+06	1.83241e+06	1.73127e+06	1.73104e+06		1.83228e+06	1.71967e+06	1.77684e+06	5.32879e+06		1.0312	0.967826		0.733757	0.289974
P62191	>sp|P62191|PRS4_HUMAN 26S proteasome regulatory subunit 4 OS=Homo sapiens GN=PSMC1 PE=1 SV=1	10	10	10	10	10	10	10	10	10	10	10	10	120	38980	242690	23008.8	265386	295211	23846.1	29794.9	29250.7	30310.2	32563.1	291521	28029.9		142516	94525.7	95606.1	332648		1.49066	0.9887		0.627927	0.991156
P62195	>sp|P62195|PRS8_HUMAN 26S proteasome regulatory subunit 8 OS=Homo sapiens GN=PSMC5 PE=1 SV=1	11	11	11	11	11	11	11	11	11	11	11	11	132	986816	1.01058e+06	924217	970365	1.02731e+06	920893	978607	943105	893352	995663	1040545	971218		972995	967478	975195	2.91567e+06		0.997744	0.992087		0.953465	0.848595
P62258	>sp|P62258|1433E_HUMAN 14-3-3 protein epsilon OS=Homo sapiens GN=YWHAE PE=1 SV=1	20	20	20	20	20	20	20	20	20	20	20	20	240	2.75305e+06	2.59519e+06	2.88313e+06	2516358	2.58511e+06	2.9065e+06	2.89499e+06	2.90882e+06	2.29252e+06	2.23733e+06	2.82943e+06	2.86275e+06		2.68693e+06	2.82386e+06	2.55551e+06	8.0663e+06		1.05143	1.10501		0.518302	0.218443
P62805	>sp|P62805|H4_HUMAN Histone H4 OS=Homo sapiens GN=HIST1H4A PE=1 SV=2	7	7	7	7	7	7	7	7	7	7	7	7	84	202912	194162	181326	150795	190515	205961	192997	194554	164612	173194	168429	194610		182299	196007	175211	553517		1.04045	1.11869		0.615561	0.0448371
P62834	>sp|P62834|RAP1A_HUMAN Ras-related protein Rap-1A OS=Homo sapiens GN=RAP1A PE=1 SV=1	9	9	9	9	9	9	9	9	9	9	9	9	108	514464	496944	394011	449171	442717	426883	401902	423408	422893	463559	447034	441329		463647	423727	443704	1.33108e+06		1.04495	0.954978		0.523841	0.14341
P62937	>sp|P62937|PPIA_HUMAN Peptidyl-prolyl cis-trans isomerase A OS=Homo sapiens GN=PPIA PE=1 SV=2	11	11	11	11	11	11	11	11	11	11	11	11	132	112677	133977	128445	191167	119018	82719.4	141335	119851	72200.8	138596	113250	130403		141566	115731	113613	370910		1.24604	1.01865		0.26387	0.915594
P68363	>sp|P68363|TBA1B_HUMAN Tubulin alpha-1B chain OS=Homo sapiens GN=TUBA1B PE=1 SV=1	6	6	6	6	6	6	6	6	6	6	6	6	72	48395.6	38333.3	33392	33949.1	31678.3	15991.8	25059.1	17428.5	25894.9	32484.2	20623.5	19532.9		38517.5	22539.4	24633.9	85690.8		1.5636	0.914978		0.0234786	0.671604
P63261	>sp|P63261|ACTG_HUMAN Actin, cytoplasmic 2 OS=Homo sapiens GN=ACTG1 PE=1 SV=1	2	2	2	2	2	2	2	2	2	2	2	2	24	213276	150634	192763	202534	163567	211839	212047	162735	134378	196908	254794	186491		189802	187547	193143	570491		0.982702	0.971028		0.910717	0.852038
P67775	>sp|P67775|PP2AA_HUMAN Serine/threonine-protein phosphatase 2A catalytic subunit alpha isoform OS=Homo sapiens GN=PPP2CA PE=1 SV=1	5	5	5	5	5	5	5	5	5	5	5	5	60	99726.3	106934	98506	95499.4	102754	93808.5	99260.1	98410.6	119418	105908	87099.6	101451		100166	98558.2	103469	302194		0.968079	0.952537		0.666798	0.522279
P68871	>sp|P68871|HBB_HUMAN Hemoglobin subunit beta OS=Homo sapiens GN=HBB PE=1 SV=2	16	16	16	16	16	16	16	16	16	16	16	16	192	291571264	555909632	288690752	345668800	344442016	293850432	304493952	305702176	355749888	324437376	314824736	372785376		370460112	312122144	341949344	1024531600		1.08338	0.912773		0.686575	0.140429
P69891	>sp|P69891|HBG1_HUMAN Hemoglobin subunit gamma-1 OS=Homo sapiens GN=HBG1 PE=1 SV=2	2	2	2	2	2	2	2	2	2	2	2	2	24	586553	439189	622341	684873	498194	672858	656547	390672	411411	563878	536815	640879		583239	554568	538246	1.67605e+06		1.08359	1.03032		0.547924	0.850432
P78417;Q5TA02	>sp|P78417|GSTO1_HUMAN Glutathione S-transferase omega-1 OS=Homo sapiens GN=GSTO1 PE=1 SV=2;>tr|Q5TA02|Q5TA02_HUMAN Glutathione S-transferase omega-1 (Fragment) OS=Homo sapiens GN=GSTO1 PE=1 SV=1	1	1	1	1	1	1	1	1	1	1	1	1	12	21854.7	13208	57625.8	15037.2	34579.1	76918	66152.3	69049.7	20150.2	57134.9	54780.3	71241.4		26931.4	61674.8	50826.7	139433		0.529867	1.21343		0.163072	0.477482
P69892	>sp|P69892|HBG2_HUMAN Hemoglobin subunit gamma-2 OS=Homo sapiens GN=HBG2 PE=1 SV=2	13	13	13	13	13	13	13	13	13	13	13	13	156	4660866	4.86913e+06	4.16601e+06	17382022	4894089	4.67263e+06	4499196	4415058	4971884	9165492	4.8595e+06	3.65939e+06		7.76951e+06	4.62024e+06	5.66407e+06	1.80538e+07		1.37172	0.815711		0.573504	0.450545
Q01469	>sp|Q01469|FABP5_HUMAN Fatty acid-binding protein, epidermal OS=Homo sapiens GN=FABP5 PE=1 SV=3	4	4	4	4	4	4	4	4	4	4	4	4	48	17668	50796.2	17353.8	21042	18205.1	19454.7	25298.2	15714.7	33094.9	33165.7	44265.1	17189.3		26715	19668.2	31928.7	78311.9		0.836707	0.616002		0.616354	0.111462
Q01518	>sp|Q01518|CAP1_HUMAN Adenylyl cyclase-associated protein 1 OS=Homo sapiens GN=CAP1 PE=1 SV=5	7	7	7	7	7	7	7	7	7	7	7	7	84	79699.1	97429.1	65812.6	28286.9	71427.4	81828.2	71387.2	74942	68246.2	70689.3	86798	64523.2		67806.9	74896.2	72564.2	215267		0.93444	1.03214		0.775213	0.690962
P69905	>sp|P69905|HBA_HUMAN Hemoglobin subunit alpha OS=Homo sapiens GN=HBA1 PE=1 SV=2	21	21	21	21	21	21	21	21	21	21	21	21	252	245713040	234553536	226223760	269828320	236379712	210398480	226830208	172373200	182442384	243660960	133317304	228061248		244079664	211495400	196870474	652445538		1.2398	1.07429		0.153219	0.631627
Q00013	>sp|Q00013|EM55_HUMAN 55 kDa erythrocyte membrane protein OS=Homo sapiens GN=MPP1 PE=1 SV=2	29	29	29	29	29	29	29	29	29	29	29	29	348	350130	376259	349505	352523	378983	384598	391383	389190	381719	360455	367766	353723		357104	386039	365916	1.10906e+06		0.97592	1.05499		0.354712	0.035603
Q04656	>sp|Q04656|ATP7A_HUMAN Copper-transporting ATPase 1 OS=Homo sapiens GN=ATP7A PE=1 SV=3	5	5	5	5	5	5	5	5	5	5	5	5	60	119744	131103	99662.2	150812	129744	111134	111079	109956	137298	120636	125496	147050		125330	115478	132620	373429		0.945033	0.870743		0.578952	0.0675709
Q04760	>sp|Q04760|LGUL_HUMAN Lactoylglutathione lyase OS=Homo sapiens GN=GLO1 PE=1 SV=4	8	8	8	8	8	8	8	8	8	8	8	8	96	185419	198531	177346	211797	185936	201080	188859	161461	181755	194892	181705	205833		193273	184334	191047	568654		1.01165	0.964864		0.823795	0.535272
Q06323	>sp|Q06323|PSME1_HUMAN Proteasome activator complex subunit 1 OS=Homo sapiens GN=PSME1 PE=1 SV=1	17	17	17	17	17	17	17	17	17	17	17	17	204	202687	231279	179304	196708	168454	188341	172986	186588	181298	209134	182210	190598		202495	179092	190810	572397		1.06124	0.938589		0.396553	0.202695
Q09328	>sp|Q09328|MGT5A_HUMAN Alpha-1,6-mannosylglycoprotein 6-beta-N-acetylglucosaminyltransferase A OS=Homo sapiens GN=MGAT5 PE=2 SV=1	2	2	2	2	2	2	2	2	2	2	2	2	24	68268.5	89529.8	76514.6	80217.6	78402.3	108950	69515.2	126023	127650	76066.9	70657.3	101727		78632.6	95722.6	94025.4	268381		0.836291	1.01805		0.332903	0.930158
Q06830	>sp|Q06830|PRDX1_HUMAN Peroxiredoxin-1 OS=Homo sapiens GN=PRDX1 PE=1 SV=1	15	15	15	15	15	15	15	15	15	15	15	15	180	20324210	20139464	21918290	26807758	24019926	21385958	20847292	22343892	23179738	21711246	21808280	27723440		2.22974e+07	22149267	23605676	6.80524e+07		0.944579	0.938303		0.556695	0.403276
Q08495	>sp|Q08495|DEMA_HUMAN Dematin OS=Homo sapiens GN=DMTN PE=1 SV=3	37	37	37	37	37	37	37	37	37	37	37	37	444	3553199	4.14952e+06	3.42951e+06	4.52465e+06	4.0295e+06	3462958	3539391	3534979	4.09551e+06	3.89688e+06	3.69522e+06	4.01917e+06		3.91422e+06	3.64171e+06	3.9267e+06	1.14826e+07		0.996823	0.927423		0.965734	0.126492
Q13630	>sp|Q13630|FCL_HUMAN GDP-L-fucose synthase OS=Homo sapiens GN=TSTA3 PE=1 SV=1	12	12	12	12	12	12	12	12	12	12	12	12	144	56668.7	86495.2	67925	30812.6	68716.4	64169.7	85435	48625.4	54433.5	57676.8	55815.6	97358.7		60475.4	66736.6	66321.2	193533		0.911857	1.00626		0.72075	0.975328
Q13200	>sp|Q13200|PSMD2_HUMAN 26S proteasome non-ATPase regulatory subunit 2 OS=Homo sapiens GN=PSMD2 PE=1 SV=3	18	18	18	18	18	18	18	18	18	18	18	18	216	106297	104161	102327	109860	105727	116518	121657	119378	111055	102137	125625	127870		105661	115820	116672	338153		0.905631	0.992701		0.168677	0.908832
Q14974	>sp|Q14974|IMB1_HUMAN Importin subunit beta-1 OS=Homo sapiens GN=KPNB1 PE=1 SV=2	23	23	23	23	23	23	23	23	23	23	23	23	276	25342.1	31271.3	25517.2	28790.3	40513.8	34479.6	37427.9	39769.5	37050.2	36583.4	42958.8	39162.4		27730.2	38047.7	38938.7	104717		0.712151	0.977118		0.00149786	0.670005
Q15008	>sp|Q15008|PSMD6_HUMAN 26S proteasome non-ATPase regulatory subunit 6 OS=Homo sapiens GN=PSMD6 PE=1 SV=1	7	7	7	7	7	7	7	7	7	7	7	7	84	26858	19038.1	15259.8	23051	16602.2	19292.9	16559.1	22815	14201.9	12117.9	10832	19925.3		21051.7	18817.3	14269.3	54138.3		1.47532	1.31873		0.0813252	0.122406
Q16401	>sp|Q16401|PSMD5_HUMAN 26S proteasome non-ATPase regulatory subunit 5 OS=Homo sapiens GN=PSMD5 PE=1 SV=3	13	13	13	13	13	13	13	13	13	13	13	13	156	40872.2	58051	47247.2	43018.3	52452.8	52368.1	49226	534421	55081.3	46787.2	52203.8	56407		47297.2	172117	52619.8	272034		0.898847	3.27095		0.281383	0.395408
Q13228	>sp|Q13228|SBP1_HUMAN Selenium-binding protein 1 OS=Homo sapiens GN=SELENBP1 PE=1 SV=2	38	38	38	38	38	38	38	38	38	38	38	38	456	15415511	14877808	14996533	17979146	15589511	16402130	15313174	14173068	15030744	16789230	15883219	16938578		1.58172e+07	1.53695e+07	1.61604e+07	47347163		0.978763	0.951055		0.704456	0.262238
Q14964	>sp|Q14964|RB39A_HUMAN Ras-related protein Rab-39A OS=Homo sapiens GN=RAB39A PE=1 SV=2	3	3	3	3	3	3	3	3	3	3	3	3	36	2.47435e+06	2.33511e+06	2598083	2.55631e+06	1.743e+06	2.11149e+06	2092150	2.19985e+06	1.95059e+06	2.1344e+06	1.98917e+06	2.00811e+06		2.49096e+06	2.03662e+06	2.02057e+06	6.54815e+06		1.2328	1.00795		0.000886827	0.889391
Q5TBG5;Q99436	>tr|Q5TBG5|Q5TBG5_HUMAN Proteasome subunit beta type (Fragment) OS=Homo sapiens GN=PSMB7 PE=1 SV=1;>sp|Q99436|PSB7_HUMAN Proteasome subunit beta type-7 OS=Homo sapiens GN=PSMB7 PE=1 SV=1	1	1	1	1	1	1	1	1	1	1	1	1	12	413870	486664	357584	432620	477798	423860	414104	464921	438970	434840	422564	425981		422685	445171	430589	1.29844e+06		0.981643	1.03387		0.787318	0.421004
Q5HYB6	>tr|Q5HYB6|Q5HYB6_HUMAN Epididymis luminal protein 189 OS=Homo sapiens GN=DKFZp686J1372 PE=1 SV=1	22	22	22	22	22	22	22	22	22	22	22	22	264	5.45215e+06	6962538	6.57064e+06	8153268	6728190	5.97399e+06	6.20427e+06	6962139	7.63688e+06	6582844	6448123	6.46114e+06		6.78465e+06	6.46715e+06	6782247	2.0034e+07		1.00035	0.953541		0.997105	0.424313
Q5VZR0;Q9H4G4	>tr|Q5VZR0|Q5VZR0_HUMAN Golgi-associated plant pathogenesis-related protein 1 OS=Homo sapiens GN=GLIPR2 PE=1 SV=1;>sp|Q9H4G4|GAPR1_HUMAN Golgi-associated plant pathogenesis-related protein 1 OS=Homo sapiens GN=GLIPR2 PE=1 SV=3	1	1	1	1	1	1	1	1	1	1	1	1	12	20047.6	14361.3	23762.9	12614.3	22733.2	18492.6	19908.2	11970.6	29941.8	20840.6	19813.6	19933.1		17696.5	18276.2	22632.3	58605		0.781916	0.807527		0.213812	0.240706
Q5XPI4	>sp|Q5XPI4|RN123_HUMAN E3 ubiquitin-protein ligase RNF123 OS=Homo sapiens GN=RNF123 PE=1 SV=1	19	19	19	19	19	19	19	19	19	19	19	19	228	56853.1	52107.8	57522.6	68508.7	37096.4	69132.6	58888.3	52897	41983.8	58674.2	38110.2	74044.9		58748.1	54503.6	53203.3	166455		1.10422	1.02444		0.569127	0.906827
Q6B0K9	>sp|Q6B0K9|HBM_HUMAN Hemoglobin subunit mu OS=Homo sapiens GN=HBM PE=2 SV=1	4	4	4	4	4	4	4	4	4	4	4	4	48	13221.2	20950.8	8691.78	23852.2	7827.45	10185	19105.6	16871.3	8994.7	8736.83	15347.9	12353.6		16679	13497.3	11358.3	41534.6		1.46845	1.18833		0.233108	0.521892
Q6PK32	>tr|Q6PK32|Q6PK32_HUMAN ANK1 protein OS=Homo sapiens GN=ANK1 PE=1 SV=1	1	1	1	1	1	1	1	1	1	1	1	1	12	130656	116145	115084	153617	116568	119695	113801	121619	19343.3	142444	140450	131489		128876	117921	108432	355228		1.18854	1.08751		0.551385	0.771214
Q6UWP2	>sp|Q6UWP2|DHR11_HUMAN Dehydrogenase/reductase SDR family member 11 OS=Homo sapiens GN=DHRS11 PE=1 SV=1	4	4	4	4	4	4	4	4	4	4	4	4	48	16887.2	36921	39532.8	16894.6	18527.4	21572.7	20906.2	28247	46706	17432.9	19027.1	21096.6		27558.9	22313.3	26065.6	75937.9		1.05729	0.856043		0.877508	0.634394
Q5QPM7;Q5QPM9;Q92530	>tr|Q5QPM7|Q5QPM7_HUMAN Proteasome inhibitor PI31 subunit OS=Homo sapiens GN=PSMF1 PE=1 SV=2;>tr|Q5QPM9|Q5QPM9_HUMAN Proteasome inhibitor PI31 subunit (Fragment) OS=Homo sapiens GN=PSMF1 PE=1 SV=1;>sp|Q92530|PSMF1_HUMAN Proteasome inhibitor PI31 subunit OS=Homo sapiens GN=PSMF1 PE=1 SV=2	4	4	4	4	4	4	4	4	4	4	4	4	48	137007	153655	114971	161962	88233.2	91072.4	140454	66310.7	136351	118073	104375	134877		141899	96517.5	123419	361835		1.14973	0.78203		0.204635	0.191443
Q5TDH0	>sp|Q5TDH0|DDI2_HUMAN Protein DDI1 homolog 2 OS=Homo sapiens GN=DDI2 PE=1 SV=1	12	12	12	12	12	12	12	12	12	12	12	12	144	182457	142935	191551	231953	205592	149141	173838	125654	235906	146294	193564	192718		187224	163556	192120	542901		0.974513	0.851321		0.856049	0.29801
Q86VP6	>sp|Q86VP6|CAND1_HUMAN Cullin-associated NEDD8-dissociated protein 1 OS=Homo sapiens GN=CAND1 PE=1 SV=2	36	36	36	36	36	36	36	36	36	36	36	36	432	168044	143389	142876	134516	121029	135419	131290	154319	137950	132855	134125	140896		147206	135514	136457	419177		1.07878	0.993094		0.235629	0.903166
Q8IZ83	>sp|Q8IZ83|A16A1_HUMAN Aldehyde dehydrogenase family 16 member A1 OS=Homo sapiens GN=ALDH16A1 PE=1 SV=2	9	9	9	9	9	9	9	9	9	9	9	9	108	81634.6	36973.1	67001.1	81298.1	95457.9	99842.5	97860.3	101759	88302.5	79980.4	105174	105722		66726.7	98729.9	94794.7	260251		0.703908	1.04151		0.071473	0.585646
Q8IUE6	>sp|Q8IUE6|H2A2B_HUMAN Histone H2A type 2-B OS=Homo sapiens GN=HIST2H2AB PE=1 SV=3	2	2	2	2	2	2	2	2	2	2	2	2	24	3.60878e+06	4.40012e+06	3.3804e+06	2.30942e+06	3.99625e+06	3001327	3996711	4.27507e+06	3.35418e+06	3.20744e+06	2.94639e+06	2.601e+06		3424682	3.81734e+06	3.02725e+06	1.02693e+07		1.13129	1.26099		0.439556	0.0606625
Q8TB52	>sp|Q8TB52|FBX30_HUMAN F-box only protein 30 OS=Homo sapiens GN=FBXO30 PE=1 SV=3	1	1	1	1	1	1	1	1	1	1	1	1	12	24483.8	20541.5	19422.3	13260.5	20834.8	15889	21411.3	15322.2	16764.4	17450.1	16271.4	16359.9		19427	18364.3	16711.5	54502.8		1.1625	1.09891		0.327825	0.380002
Q8WUM4	>sp|Q8WUM4|PDC6I_HUMAN Programmed cell death 6-interacting protein OS=Homo sapiens GN=PDCD6IP PE=1 SV=1	28	28	28	28	28	28	28	28	28	28	28	28	336	19605.3	19498.7	17387.2	21630.9	14240.4	20430	20797.7	17939.5	22186.9	17559.3	14071.8	19951.4		19530.5	18351.9	18442.3	56324.7		1.059	0.995095		0.602278	0.969946
Q93008	>sp|Q93008|USP9X_HUMAN Probable ubiquitin carboxyl-terminal hydrolase FAF-X OS=Homo sapiens GN=USP9X PE=1 SV=3	17	17	17	17	17	17	17	17	17	17	17	17	204	12373	16349	14817.7	21525.4	11798.7	20230.4	24269.1	12125.5	13680.7	14626.3	16693.7	18406.7		16266.3	17105.9	15851.9	49224.1		1.02614	1.07911		0.858882	0.721528
Q93034	>sp|Q93034|CUL5_HUMAN Cullin-5 OS=Homo sapiens GN=CUL5 PE=1 SV=4	10	10	10	10	10	10	10	10	10	10	10	10	120	16603.2	22263.5	16010	15380.6	18028.5	11187	13092.1	23776.7	47081.3	15359.8	15910.5	19633.1		17564.3	16521.1	24496.2	58581.6		0.717024	0.674436		0.432258	0.382796
Q96A65	>sp|Q96A65|EXOC4_HUMAN Exocyst complex component 4 OS=Homo sapiens GN=EXOC4 PE=1 SV=1	1	1	1	1	1	1	1	1	1	1	1	1	12	1.04189e+06	276186	1.67239e+06	843927	496420	2064907	1.61221e+06	1.63749e+06	774756	663366	1.2688e+06	1.99013e+06		958600	1.45276e+06	1.17426e+06	3.58562e+06		0.816342	1.23716		0.623887	0.560084
Q96CD2	>sp|Q96CD2|COAC_HUMAN Phosphopantothenoylcysteine decarboxylase OS=Homo sapiens GN=PPCDC PE=1 SV=2	6	6	6	6	6	6	6	6	6	6	6	6	72	25551.6	18938	70445.6	52811.8	35451.4	63002.4	75405.7	49426.9	37044	33765.6	42077.4	87315.4		41936.8	55821.6	50050.6	147809		0.837888	1.1153		0.656686	0.719127
Q8IVF2	>sp|Q8IVF2|AHNK2_HUMAN Protein AHNAK2 OS=Homo sapiens GN=AHNAK2 PE=1 SV=2	4	4	4	4	4	4	4	4	4	4	4	4	48	686424	683546	910713	1.16761e+06	670878	806606	815909	817039	940133	753138	749697	778286		862073	777608	805313	2.44499e+06		1.07048	0.965597		0.67029	0.649136
Q96P70	>sp|Q96P70|IPO9_HUMAN Importin-9 OS=Homo sapiens GN=IPO9 PE=1 SV=3	11	11	11	11	11	11	11	11	11	11	11	11	132	49943	68292	50983.1	58492.9	62849.5	54825	62278.6	49329.7	65692.9	51964.9	48633	62326.3		56927.7	57320.7	57154.3	171403		0.996036	1.00291		0.970519	0.975557
Q99683	>sp|Q99683|M3K5_HUMAN Mitogen-activated protein kinase kinase kinase 5 OS=Homo sapiens GN=MAP3K5 PE=1 SV=1	1	1	1	1	1	1	1	1	1	1	1	1	12	549673	646044	603624	699352	600747	576486	561086	670536	733865	631142	575573	620275		624673	602214	640214	1.8671e+06		0.975726	0.940645		0.747681	0.396154
Q99832	>sp|Q99832|TCPH_HUMAN T-complex protein 1 subunit eta OS=Homo sapiens GN=CCT7 PE=1 SV=2	19	19	19	19	19	19	19	19	19	19	19	19	228	67154	71356.6	42496.9	35111.9	77640	29220	79426	39981.8	37467.8	22291	36300.2	36891.8		54029.9	56567	33237.7	143835		1.62556	1.70189		0.0986193	0.166899
Q9BRA2	>sp|Q9BRA2|TXD17_HUMAN Thioredoxin domain-containing protein 17 OS=Homo sapiens GN=TXNDC17 PE=1 SV=1	3	3	3	3	3	3	3	3	3	3	3	3	36	102289	118484	104576	132396	86129.4	77535.8	85492.1	69016.9	65660.8	107809	85536.7	91609		114436	79543.6	87654	281634		1.30554	0.907472		0.0552333	0.443002
Q9BRF8	>sp|Q9BRF8|CPPED_HUMAN Serine/threonine-protein phosphatase CPPED1 OS=Homo sapiens GN=CPPED1 PE=1 SV=3	6	6	6	6	6	6	6	6	6	6	6	6	72	52613.4	48422.8	88096.1	90286	51502.7	105901	93934.4	46134.7	48959.2	55380.1	53441.9	46612		69854.6	74368.2	51098.3	195321		1.36706	1.4554		0.192493	0.218473
Q8NCW5	>sp|Q8NCW5|NNRE_HUMAN NAD(P)H-hydrate epimerase OS=Homo sapiens GN=NAXE PE=1 SV=2	4	4	4	4	4	4	4	4	4	4	4	4	48	188085	231562	176197	173496	219434	191482	195167	228021	230979	210085	209230	185019		192335	208526	208828	609689		0.921021	0.998552		0.358029	0.9822
Q96FJ2	>sp|Q96FJ2|DYL2_HUMAN Dynein light chain 2, cytoplasmic OS=Homo sapiens GN=DYNLL2 PE=1 SV=1	2	2	2	2	2	2	2	2	2	2	2	2	24	129458	123896	155739	200382	139396	152846	142699	120924	117538	155507	162059	186320		152369	138966	155356	446691		0.980772	0.8945		0.89898	0.352787
Q9C0C9	>sp|Q9C0C9|UBE2O_HUMAN (E3-independent) E2 ubiquitin-conjugating enzyme OS=Homo sapiens GN=UBE2O PE=1 SV=3	21	21	21	21	21	21	21	21	21	21	21	21	252	40025.5	42576.6	43881.1	45958.7	48483.6	33774.4	64018.4	39853.1	21652.6	45999.4	42195.5	26383.4		43110.5	46532.4	34057.7	123701		1.26581	1.36628		0.224688	0.208547
Q9GZP4;X6R8S9;X6RHB9	>sp|Q9GZP4|PITH1_HUMAN PITH domain-containing protein 1 OS=Homo sapiens GN=PITHD1 PE=1 SV=1;>tr|X6R8S9|X6R8S9_HUMAN PITH domain-containing protein 1 OS=Homo sapiens GN=PITHD1 PE=1 SV=1;>tr|X6RHB9|X6RHB9_HUMAN PITH domain-containing protein 1 (Fragment) OS=Homo sapiens GN=PITHD1 PE=1 SV=1	1	1	1	1	1	1	1	1	1	1	1	1	12	21052.3	137535	202896	248060	131344	28001.3	141875	140826	17294.2	174357	152760	139725		152386	110512	121034	383931		1.25903	0.913064		0.625522	0.822636
Q9BSL1	>sp|Q9BSL1|UBAC1_HUMAN Ubiquitin-associated domain-containing protein 1 OS=Homo sapiens GN=UBAC1 PE=1 SV=1	15	15	15	15	15	15	15	15	15	15	15	15	180	112616	149098	153627	170839	111268	102862	106573	157584	126028	128050	130741	116408		146545	119572	125307	391423		1.16949	0.954232		0.180753	0.68956
Q9BVM4	>sp|Q9BVM4|GGACT_HUMAN Gamma-glutamylaminecyclotransferase OS=Homo sapiens GN=GGACT PE=1 SV=2	2	2	2	2	2	2	2	2	2	2	2	2	24	13834.9	172931	151538	148011	149449	112325	109636	17654.4	140657	161096	163613	112836		121579	97266.2	144550	363395		0.841081	0.672888		0.583092	0.194586
Q9HAB8	>sp|Q9HAB8|PPCS_HUMAN Phosphopantothenate--cysteine ligase OS=Homo sapiens GN=PPCS PE=1 SV=2	4	4	4	4	4	4	4	4	4	4	4	4	48	20124.4	22631	25888.9	34474.3	21182.3	23865.9	26625.5	22704.5	26371.2	24417.1	18945.6	26007.9		25779.6	23594.6	23935.4	73309.6		1.07705	0.985758		0.628951	0.875136
Q9NYP9	>sp|Q9NYP9|MS18A_HUMAN Protein Mis18-alpha OS=Homo sapiens GN=MIS18A PE=1 SV=1	1	1	1	1	1	1	1	1	1	1	1	1	12	1.17816e+06	964172	942280	787118	1.16316e+06	1.24042e+06	1.28846e+06	1536209	1.27381e+06	1.12105e+06	1.57802e+06	1.30972e+06		967932	1.30706e+06	1.32065e+06	3.59564e+06		0.73292	0.98971		0.030721	0.916817
Q9UDY4	>sp|Q9UDY4|DNJB4_HUMAN DnaJ homolog subfamily B member 4 OS=Homo sapiens GN=DNAJB4 PE=1 SV=1	1	1	1	1	1	1	1	1	1	1	1	1	12	97344.6	123270	80004.2	97116.6	117954	102688	109519	91034.5	91760.8	130700	117755	123286		99433.8	105299	115875	320608		0.858109	0.908724		0.229856	0.345061
Q9UEY8	>sp|Q9UEY8|ADDG_HUMAN Gamma-adducin OS=Homo sapiens GN=ADD3 PE=1 SV=1	9	9	9	9	9	9	9	9	9	9	9	9	108	37720.5	22326.5	31960.3	46001.7	39772.5	38597.6	34000.1	50346.7	54274.8	49535.5	26473.2	34820.4		34502.3	40679.3	41276	116457		0.835893	0.985544		0.439173	0.938377
Q9UIA9	>sp|Q9UIA9|XPO7_HUMAN Exportin-7 OS=Homo sapiens GN=XPO7 PE=1 SV=3	21	21	21	21	21	21	21	21	21	21	21	21	252	25491.3	41788.9	28175.4	33284.3	30029.3	35308.9	25255.2	21060.8	18513.3	43579.7	28240.8	29312.8		32185	27913.6	29911.6	90010.2		1.076	0.9332		0.731478	0.753229
Q9UNZ2	>sp|Q9UNZ2|NSF1C_HUMAN NSFL1 cofactor p47 OS=Homo sapiens GN=NSFL1C PE=1 SV=2	15	15	15	15	15	15	15	15	15	15	15	15	180	64548.5	54409	57021.8	67555.6	60811.2	54588	48294.3	65691.3	76034.6	65600	56131.3	63783.7		60883.7	57346.2	65387.4	183617		0.931123	0.877023		0.41663	0.199551
Q9Y3I1	>sp|Q9Y3I1|FBX7_HUMAN F-box only protein 7 OS=Homo sapiens GN=FBXO7 PE=1 SV=1	5	5	5	5	5	5	5	5	5	5	5	5	60	106475	45988.9	69724.5	21561.2	123946	43170.6	85614.2	118213	77206.5	55566.2	45414.3	120134		60937.4	92736.1	74580.2	228254		0.817073	1.24344		0.598319	0.493284
Q9Y4D1	>sp|Q9Y4D1|DAAM1_HUMAN Disheveled-associated activator of morphogenesis 1 OS=Homo sapiens GN=DAAM1 PE=1 SV=2	4	4	4	4	4	4	4	4	4	4	4	4	48	34988.2	52203.1	39245.3	54486.8	12257.1	30458.4	35271.3	37413.5	41096.5	45324	42792.3	32769		45230.9	28850.1	40495.4	114576		1.11694	0.712428		0.430933	0.134892
Q9Y4E8	>sp|Q9Y4E8|UBP15_HUMAN Ubiquitin carboxyl-terminal hydrolase 15 OS=Homo sapiens GN=USP15 PE=1 SV=3	13	13	13	13	13	13	13	13	13	13	13	13	156	28929.9	24672.4	19848.8	17782.2	18589.4	30454.8	15547.7	22661.9	29228.2	23085	18579	20539.6		22808.3	21813.5	22857.9	67479.7		0.997831	0.954307		0.988863	0.802277
transcript=PF3D7_0101300.1;transcript=PF3D7_0114100.1;transcript=PF3D7_0222100.1;transcript=PF3D7_0324100.1;transcript=PF3D7_0601200.1;transcript=PF3D7_0631400.1;transcript=PF3D7_1039700.1;transcript=PF3D7_1101700.1	>PF3D7_0101300.1-p1 | transcript=PF3D7_0101300.1 | gene=PF3D7_0101300 | organism=Plasmodium_falciparum_3D7 | gene_product=Pfmc-2TM Maurer's cleft two transmembrane protein | transcript_product=Pfmc-2TM Maurer's cleft two transmembrane protein | location=Pf3D7_01_v3:74563-75366(+) | protein_length=235 | sequence_SO=chromosome | SO=protein_coding | is_pseudo=false;>PF3D7_0114100.1-p1 | transcript=P…	2	2	2	2	2	2	2	2	2	2	2	2	24	19658.4	14835.8	18168.4	18088.1	9982.9	13759.1	20433.5	24810.5	25251.4	19426.2	19703.9	14912.2		17687.7	17246.5	19823.5	54757.6		0.892259	0.870005		0.410972	0.541216
Q9GZT8	>sp|Q9GZT8|NIF3L_HUMAN NIF3-like protein 1 OS=Homo sapiens GN=NIF3L1 PE=1 SV=2	6	6	6	6	6	6	6	6	6	6	6	6	72	266431	275540	304546	363220	313220	360930	332605	290717	199736	262910	332757	351728		302434	324368	286783	913585		1.05458	1.13106		0.718358	0.37541
transcript=PF3D7_0102500.1	>PF3D7_0102500.1-p1 | transcript=PF3D7_0102500.1 | gene=PF3D7_0102500 | organism=Plasmodium_falciparum_3D7 | gene_product=erythrocyte binding antigen-181 | transcript_product=erythrocyte binding antigen-181 | location=Pf3D7_01_v3:110750-115799(-) | protein_length=1567 | sequence_SO=chromosome | SO=protein_coding | is_pseudo=false	59	59	59	59	59	59	59	59	59	59	59	59	708	47432	97301.3	86053.8	103305	54608.9	84342	60048.6	75171	51984.1	97382.2	91906.2	79312.8		83522.9	68542.6	80146.3	232212		1.04213	0.855218		0.841344	0.38351
Q9H2M9	>sp|Q9H2M9|RBGPR_HUMAN Rab3 GTPase-activating protein non-catalytic subunit OS=Homo sapiens GN=RAB3GAP2 PE=1 SV=1	2	2	2	2	2	2	2	2	2	2	2	2	24	347610	11832.9	423385	202891	331300	327751	381894	347809	245204	288879	325237	352419		246430	347188	302935	896553		0.813475	1.14608		0.583759	0.158926
transcript=PF3D7_0103100.1	>PF3D7_0103100.1-p1 | transcript=PF3D7_0103100.1 | gene=PF3D7_0103100 | organism=Plasmodium_falciparum_3D7 | gene_product=vacuolar protein sorting-associated protein 51, putative | transcript_product=vacuolar protein sorting-associated protein 51, putative | location=Pf3D7_01_v3:134353-139257(-) | protein_length=1634 | sequence_SO=chromosome | SO=protein_coding | is_pseudo=false	4	4	4	4	4	4	4	4	4	4	4	4	48	14019.5	17117.3	27124.8	19487.9	19122.8	25174.4	16583.8	14832.1	13149.4	12214.4	18815.8	26464.6		19437.4	18928.3	17661.1	56026.7		1.10058	1.07175		0.694764	0.762352
transcript=PF3D7_0103300.1	>PF3D7_0103300.1-p1 | transcript=PF3D7_0103300.1 | gene=PF3D7_0103300 | organism=Plasmodium_falciparum_3D7 | gene_product=conserved protein, unknown function | transcript_product=conserved protein, unknown function | location=Pf3D7_01_v3:143640-146396(-) | protein_length=918 | sequence_SO=chromosome | SO=protein_coding | is_pseudo=false	5	5	5	5	5	5	5	5	5	5	5	5	60	30881	29678.6	34951.7	24183.1	28058.7	27724.6	27743.8	38599.1	23003.1	25144.8	28452.7	26659.6		29923.6	30531.5	25815	86270.2		1.15915	1.1827		0.168029	0.181274
transcript=PF3D7_0103900.1	>PF3D7_0103900.1-p1 | transcript=PF3D7_0103900.1 | gene=PF3D7_0103900 | organism=Plasmodium_falciparum_3D7 | gene_product=parasite-infected erythrocyte surface protein | transcript_product=parasite-infected erythrocyte surface protein | location=Pf3D7_01_v3:172864-174591(+) | protein_length=575 | sequence_SO=chromosome | SO=protein_coding | is_pseudo=false	20	20	20	20	20	20	20	20	20	20	20	20	240	20586	26679.3	20166.7	38019.3	40781	31495.9	22824.1	20784.7	38293.9	42780.9	23972.2	16308.9		26362.8	28971.4	30339	85673.2		0.868942	0.954925		0.614564	0.86485
transcript=PF3D7_0102200.1	>PF3D7_0102200.1-p1 | transcript=PF3D7_0102200.1 | gene=PF3D7_0102200 | organism=Plasmodium_falciparum_3D7 | gene_product=ring-infected erythrocyte surface antigen | transcript_product=ring-infected erythrocyte surface antigen | location=Pf3D7_01_v3:98819-102282(+) | protein_length=1085 | sequence_SO=chromosome | SO=protein_coding | is_pseudo=false	33	33	33	33	33	33	33	33	33	33	33	33	396	1.80649e+06	1.56686e+06	1.94721e+06	1.9178e+06	2.0491e+06	2.1156e+06	1.98303e+06	2335075	1.91734e+06	2.02344e+06	2.26321e+06	2.22675e+06		1.80959e+06	2.1207e+06	2.10768e+06	6.03798e+06		0.858569	1.00618		0.0469161	0.911643
transcript=PF3D7_0102900.1	>PF3D7_0102900.1-p1 | transcript=PF3D7_0102900.1 | gene=PF3D7_0102900 | organism=Plasmodium_falciparum_3D7 | gene_product=aspartate--tRNA ligase | transcript_product=aspartate--tRNA ligase | location=Pf3D7_01_v3:128960-130840(-) | protein_length=626 | sequence_SO=chromosome | SO=protein_coding | is_pseudo=false	18	18	18	18	18	18	18	18	18	18	18	18	216	350369	356559	354158	317727	335872	359410	354306	368378	343671	336159	308646	353940		344703	354491	335604	1.0348e+06		1.02711	1.05628		0.519071	0.168263
transcript=PF3D7_0104500.1	>PF3D7_0104500.1-p1 | transcript=PF3D7_0104500.1 | gene=PF3D7_0104500 | organism=Plasmodium_falciparum_3D7 | gene_product=conserved protein, unknown function | transcript_product=conserved protein, unknown function | location=Pf3D7_01_v3:204622-205455(-) | protein_length=277 | sequence_SO=chromosome | SO=protein_coding | is_pseudo=false	7	7	7	7	7	7	7	7	7	7	7	7	84	67724.6	95937.9	90832	90542.8	35369.9	40300.1	37372.4	100866	33791.2	92310.5	49436.5	88818.4		86259.3	53477.2	66089.2	205826		1.3052	0.809167		0.269731	0.578488
transcript=PF3D7_0104200.1	>PF3D7_0104200.1-p1 | transcript=PF3D7_0104200.1 | gene=PF3D7_0104200 | organism=Plasmodium_falciparum_3D7 | gene_product=StAR-related lipid transfer protein | transcript_product=StAR-related lipid transfer protein | location=Pf3D7_01_v3:182822-184222(-) | protein_length=466 | sequence_SO=chromosome | SO=protein_coding | is_pseudo=false	18	18	18	18	18	18	18	18	18	18	18	18	216	138489	137752	106008	127503	137240	108005	114615	121376	142035	133864	134102	126435		127438	120309	134109	381856		0.950257	0.897097		0.461928	0.113983
transcript=PF3D7_0105800.1	>PF3D7_0105800.1-p1 | transcript=PF3D7_0105800.1 | gene=PF3D7_0105800 | organism=Plasmodium_falciparum_3D7 | gene_product=cyclin-dependent kinases regulatory subunit, putative | transcript_product=cyclin-dependent kinases regulatory subunit, putative | location=Pf3D7_01_v3:249231-252010(-) | protein_length=832 | sequence_SO=chromosome | SO=protein_coding | is_pseudo=false	15	15	15	15	15	15	15	15	15	15	15	15	180	41326.3	40339.5	48230.4	53513.5	42520.7	32056	49153.5	38509.6	41722	40045.1	48493.6	39734.4		45852.4	40560	42498.8	128911		1.07891	0.95438		0.406315	0.659239
transcript=PF3D7_0106100.1	>PF3D7_0106100.1-p1 | transcript=PF3D7_0106100.1 | gene=PF3D7_0106100 | organism=Plasmodium_falciparum_3D7 | gene_product=V-type proton ATPase subunit C, putative | transcript_product=V-type proton ATPase subunit C, putative | location=Pf3D7_01_v3:260658-261809(-) | protein_length=383 | sequence_SO=chromosome | SO=protein_coding | is_pseudo=false	17	17	17	17	17	17	17	17	17	17	17	17	204	15172.4	208967	19700.2	25215.4	15257.1	173914	41423.9	18341.3	16035.1	13927.1	14896	15012.3		67263.7	62234	14967.6	144465		4.49395	4.15792		0.349412	0.298551
transcript=PF3D7_0104400.1	>PF3D7_0104400.1-p1 | transcript=PF3D7_0104400.1 | gene=PF3D7_0104400 | organism=Plasmodium_falciparum_3D7 | gene_product=4-hydroxy-3-methylbut-2-enyl diphosphate reductase | transcript_product=4-hydroxy-3-methylbut-2-enyl diphosphate reductase | location=Pf3D7_01_v3:202536-204143(+) | protein_length=535 | sequence_SO=chromosome | SO=protein_coding | is_pseudo=false	6	6	6	6	6	6	6	6	6	6	6	6	72	349881	414427	282882	205970	326221	357000	323247	362364	271576	355047	331916	288182		313290	342208	311680	967179		1.00517	1.09795		0.975183	0.225339
transcript=PF3D7_0105200.1	>PF3D7_0105200.1-p1 | transcript=PF3D7_0105200.1 | gene=PF3D7_0105200 | organism=Plasmodium_falciparum_3D7 | gene_product=heptatricopeptide repeat and RAP domain-containing protein, putative | transcript_product=heptatricopeptide repeat and RAP domain-containing protein, putative | location=Pf3D7_01_v3:222254-223960(-) | protein_length=568 | sequence_SO=chromosome | SO=protein_coding | is_pseudo=…	19	19	19	19	19	19	19	19	19	19	19	19	228	394440	284721	348506	366285	309885	355053	327215	319789	304887	271406	328666	364626		348488	327986	317397	993870		1.09796	1.03336		0.347616	0.65197
transcript=PF3D7_0106700.1	>PF3D7_0106700.1-p1 | transcript=PF3D7_0106700.1 | gene=PF3D7_0106700 | organism=Plasmodium_falciparum_3D7 | gene_product=small ribosomal subunit assembling AARP2 protein | transcript_product=small ribosomal subunit assembling AARP2 protein | location=Pf3D7_01_v3:281155-285459(+) | protein_length=1434 | sequence_SO=chromosome | SO=protein_coding | is_pseudo=false	7	7	7	7	7	7	7	7	7	7	7	7	84	17547.5	33994.2	31092.6	19934.4	45031.9	19742.1	44320.5	22392.1	21360.8	49894.2	46724.4	16396.1		25642.2	32871.7	33593.9	92107.7		0.763299	0.978502		0.446428	0.949762
transcript=PF3D7_0106800.1	>PF3D7_0106800.1-p1 | transcript=PF3D7_0106800.1 | gene=PF3D7_0106800 | organism=Plasmodium_falciparum_3D7 | gene_product=ras-related protein Rab-5C | transcript_product=ras-related protein Rab-5C | location=Pf3D7_01_v3:286951-288918(+) | protein_length=214 | sequence_SO=chromosome | SO=protein_coding | is_pseudo=false	14	14	14	14	14	14	14	14	14	14	14	14	168	86083.7	54378.4	22853.3	44226.1	51082.2	111094	58792.2	78894.2	59353.4	61681.5	58644.5	84371.1		51885.4	74965.6	66012.6	192864		0.785991	1.13563		0.382758	0.574808
transcript=PF3D7_0106300.1	>PF3D7_0106300.1-p1 | transcript=PF3D7_0106300.1 | gene=PF3D7_0106300 | organism=Plasmodium_falciparum_3D7 | gene_product=calcium-transporting ATPase | transcript_product=calcium-transporting ATPase | location=Pf3D7_01_v3:265208-269173(-) | protein_length=1228 | sequence_SO=chromosome | SO=protein_coding | is_pseudo=false	48	48	48	48	48	48	48	48	48	48	48	48	576	148514	169704	192159	197124	303036	142337	163097	192457	168439	188100	197442	147498		176875	200232	175370	552477		1.00859	1.14177		0.926912	0.547208
transcript=PF3D7_0106400.1	>PF3D7_0106400.1-p1 | transcript=PF3D7_0106400.1 | gene=PF3D7_0106400 | organism=Plasmodium_falciparum_3D7 | gene_product=pre-rRNA-processing protein TSR2, putative | transcript_product=pre-rRNA-processing protein TSR2, putative | location=Pf3D7_01_v3:272454-273404(+) | protein_length=156 | sequence_SO=chromosome | SO=protein_coding | is_pseudo=false	6	6	6	6	6	6	6	6	6	6	6	6	72	106071	114316	85575.3	125378	107075	106256	101368	103813	122322	112287	115146	108652		107835	104628	114602	327065		0.940954	0.912971		0.49228	0.0330036
transcript=PF3D7_0107000.1	>PF3D7_0107000.1-p1 | transcript=PF3D7_0107000.1 | gene=PF3D7_0107000 | organism=Plasmodium_falciparum_3D7 | gene_product=centrin-1 | transcript_product=centrin-1 | location=Pf3D7_01_v3:293642-294968(+) | protein_length=168 | sequence_SO=chromosome | SO=protein_coding | is_pseudo=false	12	12	12	12	12	12	12	12	12	12	12	12	144	200232	285301	204280	252788	214791	178917	204576	234946	268027	226388	168685	198283		235650	208307	215346	659304		1.09429	0.967316		0.515461	0.783161
transcript=PF3D7_0107500.1	>PF3D7_0107500.1-p1 | transcript=PF3D7_0107500.1 | gene=PF3D7_0107500 | organism=Plasmodium_falciparum_3D7 | gene_product=Niemann-Pick type C1-related protein | transcript_product=Niemann-Pick type C1-related protein | location=Pf3D7_01_v3:304362-309257(-) | protein_length=1470 | sequence_SO=chromosome | SO=protein_coding | is_pseudo=false	29	29	29	29	29	29	29	29	29	29	29	29	348	124304	100046	115289	139711	116444	121963	137724	124154	122100	121556	142604	122770		119838	125071	127258	372166		0.941694	0.982819		0.481256	0.759891
transcript=PF3D7_0108000.1	>PF3D7_0108000.1-p1 | transcript=PF3D7_0108000.1 | gene=PF3D7_0108000 | organism=Plasmodium_falciparum_3D7 | gene_product=proteasome subunit beta type-3, putative | transcript_product=proteasome subunit beta type-3, putative | location=Pf3D7_01_v3:328431-329558(-) | protein_length=218 | sequence_SO=chromosome | SO=protein_coding | is_pseudo=false	6	6	6	6	6	6	6	6	6	6	6	6	72	2.25974e+06	2.40019e+06	2.17604e+06	2.08145e+06	2.4395e+06	2.79912e+06	2507260	2476384	2.3954e+06	2.35575e+06	2.65216e+06	2.60279e+06		2.22935e+06	2.55557e+06	2.50152e+06	7.28644e+06		0.891199	1.0216		0.0349845	0.642708
transcript=PF3D7_0108300.1	>PF3D7_0108300.1-p1 | transcript=PF3D7_0108300.1 | gene=PF3D7_0108300 | organism=Plasmodium_falciparum_3D7 | gene_product=conserved Plasmodium protein, unknown function | transcript_product=conserved Plasmodium protein, unknown function | location=Pf3D7_01_v3:337168-343833(+) | protein_length=2221 | sequence_SO=chromosome | SO=protein_coding | is_pseudo=false	55	55	55	55	55	55	55	55	55	55	55	55	660	1.54098e+06	1.82068e+06	1.35713e+06	1.62205e+06	1.42115e+06	1.16119e+06	1.19116e+06	1.28064e+06	1.68121e+06	1518226	1.24529e+06	1.32397e+06		1.58521e+06	1.26353e+06	1.44217e+06	4.29092e+06		1.09918	0.876132		0.337904	0.179906
transcript=PF3D7_0109000.1	>PF3D7_0109000.1-p1 | transcript=PF3D7_0109000.1 | gene=PF3D7_0109000 | organism=Plasmodium_falciparum_3D7 | gene_product=photosensitized INA-labeled protein PHIL1 | transcript_product=photosensitized INA-labeled protein PHIL1 | location=Pf3D7_01_v3:363318-363992(+) | protein_length=224 | sequence_SO=chromosome | SO=protein_coding | is_pseudo=false	11	11	11	11	11	11	11	11	11	11	11	11	132	54913.7	93462.4	94864.3	147792	63948.7	61274.7	68714.8	101856	104856	61616.1	64517	74596.7		97758.1	73948.7	76396.4	248103		1.27962	0.96796		0.370449	0.863712
transcript=PF3D7_0108500.1	>PF3D7_0108500.1-p1 | transcript=PF3D7_0108500.1 | gene=PF3D7_0108500 | organism=Plasmodium_falciparum_3D7 | gene_product=conserved Plasmodium protein, unknown function | transcript_product=conserved Plasmodium protein, unknown function | location=Pf3D7_01_v3:349170-349709(+) | protein_length=179 | sequence_SO=chromosome | SO=protein_coding | is_pseudo=false	3	3	3	3	3	3	3	3	3	3	3	3	36	2.41396e+06	3.07365e+06	2.28175e+06	3.79519e+06	3074794	2.28649e+06	2544857	2.58131e+06	3.04192e+06	2.95413e+06	2739238	2.75023e+06		2.89114e+06	2.62186e+06	2.87138e+06	8.38438e+06		1.00688	0.913102		0.958908	0.236933
transcript=PF3D7_0109400.1	>PF3D7_0109400.1-p1 | transcript=PF3D7_0109400.1 | gene=PF3D7_0109400 | organism=Plasmodium_falciparum_3D7 | gene_product=tubulin-specific chaperone a, putative | transcript_product=tubulin-specific chaperone a, putative | location=Pf3D7_01_v3:374439-375087(-) | protein_length=166 | sequence_SO=chromosome | SO=protein_coding | is_pseudo=false	13	13	13	13	13	13	13	13	13	13	13	13	156	54924.7	51859.4	69476.9	74820.5	74409.9	42028.2	32841.3	85280.9	80655.7	77478.7	74087.5	38853.5		62770.4	58640.1	67768.9	189179		0.926242	0.865295		0.675102	0.588164
transcript=PF3D7_0109500.1	>PF3D7_0109500.1-p1 | transcript=PF3D7_0109500.1 | gene=PF3D7_0109500 | organism=Plasmodium_falciparum_3D7 | gene_product=N-acetyltransferase, GNAT family, putative | transcript_product=N-acetyltransferase, GNAT family, putative | location=Pf3D7_01_v3:376294-377004(-) | protein_length=155 | sequence_SO=chromosome | SO=protein_coding | is_pseudo=false	3	3	3	3	3	3	3	3	3	3	3	3	36	15656.4	25905.9	11539	22754.7	15984.3	15483	16495.7	12269.1	12861.5	14766	15564.5	16755.9		18964	15058	14987	49009		1.26537	1.00474		0.314997	0.956738
transcript=PF3D7_0109800.1	>PF3D7_0109800.1-p1 | transcript=PF3D7_0109800.1 | gene=PF3D7_0109800 | organism=Plasmodium_falciparum_3D7 | gene_product=phenylalanine--tRNA ligase alpha subunit | transcript_product=phenylalanine--tRNA ligase alpha subunit | location=Pf3D7_01_v3:380697-382424(+) | protein_length=575 | sequence_SO=chromosome | SO=protein_coding | is_pseudo=false	9	9	9	9	9	9	9	9	9	9	9	9	108	17463.9	30411.7	23296.3	17967.2	26659.9	28119.3	28540.9	29734.1	19330.5	27255.4	14514.7	28857.5		22284.8	28263.5	22489.5	73037.8		0.990896	1.25674		0.965402	0.185423
transcript=PF3D7_0108700.1	>PF3D7_0108700.1-p1 | transcript=PF3D7_0108700.1 | gene=PF3D7_0108700 | organism=Plasmodium_falciparum_3D7 | gene_product=secreted ookinete protein, putative | transcript_product=secreted ookinete protein, putative | location=Pf3D7_01_v3:352314-356211(-) | protein_length=1152 | sequence_SO=chromosome | SO=protein_coding | is_pseudo=false	23	23	23	23	23	23	23	23	23	23	23	23	276	292162	341277	289715	341132	309143	272769	289790	318087	338910	319621	314733	310953		316072	297447	321054	934573		0.98448	0.92647		0.767912	0.103865
transcript=PF3D7_0109200.1	>PF3D7_0109200.1-p1 | transcript=PF3D7_0109200.1 | gene=PF3D7_0109200 | organism=Plasmodium_falciparum_3D7 | gene_product=cleavage and polyadenylation specificity factor subunit 5, putative | transcript_product=cleavage and polyadenylation specificity factor subunit 5, putative | location=Pf3D7_01_v3:369480-370178(-) | protein_length=232 | sequence_SO=chromosome | SO=protein_coding | is_pseudo=fa…	4	4	4	4	4	4	4	4	4	4	4	4	48	12985.9	20578	169979	129532	12719.6	117252	19451.7	171541	229158	14538.6	170988	172915		83269	80241.1	146900	310410		0.566842	0.54623		0.335145	0.311873
transcript=PF3D7_0110600.1	>PF3D7_0110600.1-p1 | transcript=PF3D7_0110600.1 | gene=PF3D7_0110600 | organism=Plasmodium_falciparum_3D7 | gene_product=phosphatidylinositol-4-phosphate 5-kinase | transcript_product=phosphatidylinositol-4-phosphate 5-kinase | location=Pf3D7_01_v3:405739-412169(+) | protein_length=1710 | sequence_SO=chromosome | SO=protein_coding | is_pseudo=false	17	17	17	17	17	17	17	17	17	17	17	17	204	37100.8	36536.3	34156.4	40853.4	89458.6	65427.2	75367.5	32468	36076.5	83584.3	43295.8	87820.7		37161.7	65680.3	62694.3	165536		0.592745	1.04763		0.152268	0.874175
transcript=PF3D7_0110400.1	>PF3D7_0110400.1-p1 | transcript=PF3D7_0110400.1 | gene=PF3D7_0110400 | organism=Plasmodium_falciparum_3D7 | gene_product=DNA-directed RNA polymerase II subunit RPB9, putative | transcript_product=DNA-directed RNA polymerase II subunit RPB9, putative | location=Pf3D7_01_v3:393875-394835(-) | protein_length=249 | sequence_SO=chromosome | SO=protein_coding | is_pseudo=false	9	9	9	9	9	9	9	9	9	9	9	9	108	144175	168889	132212	212702	158843	160178	155850	286241	278226	160680	191741	186931		164494	190278	204395	559167		0.804788	0.930935		0.252551	0.742577
transcript=PF3D7_0110500.1	>PF3D7_0110500.1-p1 | transcript=PF3D7_0110500.1 | gene=PF3D7_0110500 | organism=Plasmodium_falciparum_3D7 | gene_product=bromodomain protein, putative | transcript_product=bromodomain protein, putative | location=Pf3D7_01_v3:396591-403606(+) | protein_length=2285 | sequence_SO=chromosome | SO=protein_coding | is_pseudo=false	36	36	36	36	36	36	36	36	36	36	36	36	432	92811.2	124500	100376	99310.9	98990.5	96530.5	99277.3	91190.2	115844	108990	78906.8	94440.3		104250	96497.1	99545.4	300292		1.04726	0.969378		0.677427	0.738959
transcript=PF3D7_0110700.1	>PF3D7_0110700.1-p1 | transcript=PF3D7_0110700.1 | gene=PF3D7_0110700 | organism=Plasmodium_falciparum_3D7 | gene_product=chromatin assembly factor 1 protein WD40 domain, putative | transcript_product=chromatin assembly factor 1 protein WD40 domain, putative | location=Pf3D7_01_v3:413760-415100(-) | protein_length=446 | sequence_SO=chromosome | SO=protein_coding | is_pseudo=false	9	9	9	9	9	9	9	9	9	9	9	9	108	173757	187136	165916	179319	164305	141631	140866	131071	185975	175762	148146	150135		176532	144468	165005	486005		1.06986	0.87554		0.326438	0.134827
transcript=PF3D7_0110800.1	>PF3D7_0110800.1-p1 | transcript=PF3D7_0110800.1 | gene=PF3D7_0110800 | organism=Plasmodium_falciparum_3D7 | gene_product=transcription initiation factor TFIIB, putative | transcript_product=transcription initiation factor TFIIB, putative | location=Pf3D7_01_v3:417921-419607(+) | protein_length=367 | sequence_SO=chromosome | SO=protein_coding | is_pseudo=false	7	7	7	7	7	7	7	7	7	7	7	7	84	152489	124512	255495	307254	238280	200757	207792	150788	144231	222708	257388	197861		209937	199404	205547	614889		1.02136	0.970116		0.932465	0.844627
transcript=PF3D7_0112000.1	>PF3D7_0112000.1-p1 | transcript=PF3D7_0112000.1 | gene=PF3D7_0112000 | organism=Plasmodium_falciparum_3D7 | gene_product=TatD-like deoxyribonuclease | transcript_product=TatD-like deoxyribonuclease | location=Pf3D7_01_v3:450831-453118(-) | protein_length=447 | sequence_SO=chromosome | SO=protein_coding | is_pseudo=false	15	15	15	15	15	15	15	15	15	15	15	15	180	79283.6	72423.1	26514.2	20729.3	84612	48716.4	24899.6	63981.6	18111.6	18281.6	55679.4	73042.6		49737.6	55552.4	41278.8	146569		1.20492	1.34579		0.694558	0.473818
transcript=PF3D7_0111400.1	>PF3D7_0111400.1-p1 | transcript=PF3D7_0111400.1 | gene=PF3D7_0111400 | organism=Plasmodium_falciparum_3D7 | gene_product=conserved Plasmodium protein, unknown function | transcript_product=conserved Plasmodium protein, unknown function | location=Pf3D7_01_v3:436408-438564(+) | protein_length=718 | sequence_SO=chromosome | SO=protein_coding | is_pseudo=false	19	19	19	19	19	19	19	19	19	19	19	19	228	471913	487951	366078	411393	400378	415212	365599	419316	418961	421965	363562	349327		434334	400126	388454	1.22291e+06		1.11811	1.03005		0.229862	0.62307
transcript=PF3D7_0113900.1	>PF3D7_0113900.1-p1 | transcript=PF3D7_0113900.1 | gene=PF3D7_0113900 | organism=Plasmodium_falciparum_3D7 | gene_product=CX3CL1-binding protein 1 | transcript_product=CX3CL1-binding protein 1 | location=Pf3D7_01_v3:537109-538025(-) | protein_length=243 | sequence_SO=chromosome | SO=protein_coding | is_pseudo=false	3	3	3	3	3	3	3	3	3	3	3	3	36	17006.4	19806.3	14966.4	20207.6	20143	18790.5	19749.3	18285.2	22105	20473.8	17679.7	25102.2		17996.7	19242	21340.2	58578.8		0.843323	0.901679		0.145319	0.272428
transcript=PF3D7_0111500.1	>PF3D7_0111500.1-p1 | transcript=PF3D7_0111500.1 | gene=PF3D7_0111500 | organism=Plasmodium_falciparum_3D7 | gene_product=UMP-CMP kinase, putative | transcript_product=UMP-CMP kinase, putative | location=Pf3D7_01_v3:439652-441418(-) | protein_length=371 | sequence_SO=chromosome | SO=protein_coding | is_pseudo=false	10	10	10	10	10	10	10	10	10	10	10	10	120	185935	204240	162410	162002	176618	178871	182274	190487	197748	185932	177505	183366		178646	182063	186138	546847		0.959753	0.978105		0.534964	0.468199
transcript=PF3D7_0202600.1;transcript=PF3D7_0202600.2	>PF3D7_0202600.1-p1 | transcript=PF3D7_0202600.1 | gene=PF3D7_0202600 | organism=Plasmodium_falciparum_3D7 | gene_product=nucleic acid binding protein, putative | transcript_product=nucleic acid binding protein, putative | location=Pf3D7_02_v3:129342-133563(-) | protein_length=1341 | sequence_SO=chromosome | SO=protein_coding | is_pseudo=false;>PF3D7_0202600.2-p1 | transcript=PF3D7_0202600.2 | ge…	12	12	12	12	12	12	12	12	12	12	12	12	144	43102.6	43523.6	42422.8	143913	45758.8	77074.8	37652.6	44171.2	47352.5	46704.8	38343.4	45213.1		68240.5	51164.3	44403.4	163808		1.53683	1.15226		0.414934	0.504406
transcript=PF3D7_0203000.1	>PF3D7_0203000.1-p1 | transcript=PF3D7_0203000.1 | gene=PF3D7_0203000 | organism=Plasmodium_falciparum_3D7 | gene_product=repetitive organellar protein, putative | transcript_product=repetitive organellar protein, putative | location=Pf3D7_02_v3:141625-147564(-) | protein_length=1979 | sequence_SO=chromosome | SO=protein_coding | is_pseudo=false	18	18	18	18	18	18	18	18	18	18	18	18	216	143814	73031.5	41165.8	84484	59609.4	38352.5	61930.8	153277	76601.1	63198	111657	62130.4		85623.9	78292.5	78396.6	242313		1.09219	0.998671		0.779708	0.997207
transcript=PF3D7_0113000.1	>PF3D7_0113000.1-p1 | transcript=PF3D7_0113000.1 | gene=PF3D7_0113000 | organism=Plasmodium_falciparum_3D7 | gene_product=glutamic acid-rich protein GARP | transcript_product=glutamic acid-rich protein GARP | location=Pf3D7_01_v3:487892-490127(-) | protein_length=673 | sequence_SO=chromosome | SO=protein_coding | is_pseudo=false	8	8	8	8	8	8	8	8	8	8	8	8	96	602990	666878	665278	856329	683986	457859	555611	762805	852998	703391	723267	503392		697869	615065	695762	2.0087e+06		1.00303	0.884017		0.982273	0.445828
transcript=PF3D7_0203400.1	>PF3D7_0203400.1-p1 | transcript=PF3D7_0203400.1 | gene=PF3D7_0203400 | organism=Plasmodium_falciparum_3D7 | gene_product=conserved Plasmodium protein, unknown function | transcript_product=conserved Plasmodium protein, unknown function | location=Pf3D7_02_v3:162065-162900(-) | protein_length=91 | sequence_SO=chromosome | SO=protein_coding | is_pseudo=false	5	5	5	5	5	5	5	5	5	5	5	5	60	43586.6	43356	48049.4	45099.3	44599.2	48563.4	47540.4	47472.6	36685.8	40888.6	19392.1	46266.3		45022.8	47043.9	35808.2	127875		1.25733	1.31378		0.21118	0.147947
transcript=PF3D7_0204100.1	>PF3D7_0204100.1-p1 | transcript=PF3D7_0204100.1 | gene=PF3D7_0204100 | organism=Plasmodium_falciparum_3D7 | gene_product=Sel1 repeat-containing protein, putative | transcript_product=Sel1 repeat-containing protein, putative | location=Pf3D7_02_v3:182228-189115(-) | protein_length=2295 | sequence_SO=chromosome | SO=protein_coding | is_pseudo=false	40	40	40	40	40	40	40	40	40	40	40	40	480	82667	52826.8	83695.8	96136.7	84321.4	76236.1	83793.6	47584.9	53849.1	92239.4	94071.1	56375.6		78831.6	72984	74133.8	225949		1.06337	0.98449		0.754615	0.937374
transcript=PF3D7_0204500.1	>PF3D7_0204500.1-p1 | transcript=PF3D7_0204500.1 | gene=PF3D7_0204500 | organism=Plasmodium_falciparum_3D7 | gene_product=aspartate transaminase | transcript_product=aspartate transaminase | location=Pf3D7_02_v3:198353-199570(-) | protein_length=405 | sequence_SO=chromosome | SO=protein_coding | is_pseudo=false	6	6	6	6	6	6	6	6	6	6	6	6	72	76210	40888.9	66468.9	46803.8	75651.9	79291.9	84135.6	63360.4	51567.3	70333	67402.3	65759.1		57592.9	75610	63765.4	196968		0.903199	1.18575		0.538306	0.100051
transcript=PF3D7_0204900.1	>PF3D7_0204900.1-p1 | transcript=PF3D7_0204900.1 | gene=PF3D7_0204900 | organism=Plasmodium_falciparum_3D7 | gene_product=2-methoxy-6-polyprenyl-1,4-benzoquinol methylase, mitochondrial, putative | transcript_product=2-methoxy-6-polyprenyl-1,4-benzoquinol methylase, mitochondrial, putative | location=Pf3D7_02_v3:211348-212627(+) | protein_length=354 | sequence_SO=chromosome | SO=protein_coding | …	5	5	5	5	5	5	5	5	5	5	5	5	60	39313.2	56230.9	15666	23874.1	35615.7	15722.2	21538.4	17093.8	17279.9	42312.8	39186.3	47059		33771.1	22492.5	36459.5	92723.1		0.926263	0.616919		0.817634	0.138087
transcript=PF3D7_0202400.1	>PF3D7_0202400.1-p1 | transcript=PF3D7_0202400.1 | gene=PF3D7_0202400 | organism=Plasmodium_falciparum_3D7 | gene_product=translation-enhancing factor | transcript_product=translation-enhancing factor | location=Pf3D7_02_v3:120524-124102(+) | protein_length=1192 | sequence_SO=chromosome | SO=protein_coding | is_pseudo=false	22	22	22	22	22	22	22	22	22	22	22	22	264	170998	205300	220884	250654	203341	205914	198875	253170	218311	230246	258630	198260		211959	215325	226362	653646		0.936373	0.951245		0.517029	0.560229
transcript=PF3D7_0205600.1	>PF3D7_0205600.1-p1 | transcript=PF3D7_0205600.1 | gene=PF3D7_0205600 | organism=Plasmodium_falciparum_3D7 | gene_product=conserved Plasmodium protein, unknown function | transcript_product=conserved Plasmodium protein, unknown function | location=Pf3D7_02_v3:228025-229932(+) | protein_length=635 | sequence_SO=chromosome | SO=protein_coding | is_pseudo=false	2	2	2	2	2	2	2	2	2	2	2	2	24	12325.3	8564.35	12245.9	10062.3	8566.66	16992.2	12731	10897.7	6636.63	10190.1	16023.7	15088.5		10799.5	12296.9	11984.7	35081.1		0.9011	1.02605		0.644001	0.915815
transcript=PF3D7_0203100.1	>PF3D7_0203100.1-p1 | transcript=PF3D7_0203100.1 | gene=PF3D7_0203100 | organism=Plasmodium_falciparum_3D7 | gene_product=protein kinase, putative | transcript_product=protein kinase, putative | location=Pf3D7_02_v3:149524-156981(-) | protein_length=2485 | sequence_SO=chromosome | SO=protein_coding | is_pseudo=false	2	2	2	2	2	2	2	2	2	2	2	2	24	578068	690281	477675	329390	544564	588572	537854	598305	455860	600325	567219	477880		518853	567324	525321	1.6115e+06		0.987688	1.07996		0.942265	0.328439
transcript=PF3D7_0205500.1	>PF3D7_0205500.1-p1 | transcript=PF3D7_0205500.1 | gene=PF3D7_0205500 | organism=Plasmodium_falciparum_3D7 | gene_product=DNA-directed RNA polymerase II 16 kDa subunit, putative | transcript_product=DNA-directed RNA polymerase II 16 kDa subunit, putative | location=Pf3D7_02_v3:225562-226245(-) | protein_length=132 | sequence_SO=chromosome | SO=protein_coding | is_pseudo=false	8	8	8	8	8	8	8	8	8	8	8	8	96	310555	318092	315111	386889	321611	324503	306161	350372	342864	328308	339638	397505		332662	325662	352079	1.0104e+06		0.94485	0.924969		0.447165	0.203015
transcript=PF3D7_0206800.1	>PF3D7_0206800.1-p1 | transcript=PF3D7_0206800.1 | gene=PF3D7_0206800 | organism=Plasmodium_falciparum_3D7 | gene_product=merozoite surface protein 2 | transcript_product=merozoite surface protein 2 | location=Pf3D7_02_v3:273689-274507(-) | protein_length=272 | sequence_SO=chromosome | SO=protein_coding | is_pseudo=false	6	6	6	6	6	6	6	6	6	6	6	6	72	28943.9	39739.6	45054.3	70643.8	41103.5	37839.9	46312.1	32523.7	28071.4	34730.1	43629.6	19624.2		46095.4	39444.8	31513.8	117054		1.4627	1.25167		0.214722	0.236025
transcript=PF3D7_0205900.1	>PF3D7_0205900.1-p1 | transcript=PF3D7_0205900.1 | gene=PF3D7_0205900 | organism=Plasmodium_falciparum_3D7 | gene_product=26S proteasome regulatory subunit RPN1, putative | transcript_product=26S proteasome regulatory subunit RPN1, putative | location=Pf3D7_02_v3:235237-238816(+) | protein_length=966 | sequence_SO=chromosome | SO=protein_coding | is_pseudo=false	31	31	31	31	31	31	31	31	31	31	31	31	372	899630	1.02356e+06	1.09996e+06	968689	1.02748e+06	1.00242e+06	980264	1.02484e+06	912032	866794	886862	1.06592e+06		997960	1.00875e+06	932903	2.93961e+06		1.06974	1.0813		0.334992	0.192574
transcript=PF3D7_0206700.1	>PF3D7_0206700.1-p1 | transcript=PF3D7_0206700.1 | gene=PF3D7_0206700 | organism=Plasmodium_falciparum_3D7 | gene_product=adenylosuccinate lyase | transcript_product=adenylosuccinate lyase | location=Pf3D7_02_v3:271594-273009(+) | protein_length=471 | sequence_SO=chromosome | SO=protein_coding | is_pseudo=false	13	13	13	13	13	13	13	13	13	13	13	13	156	45979.3	51561.9	151677	187586	183290	154838	163512	166835	20059.4	45593.3	171512	187975		109201	167119	106285	382605		1.02744	1.57237		0.960047	0.251268
transcript=PF3D7_0207400.1	>PF3D7_0207400.1-p1 | transcript=PF3D7_0207400.1 | gene=PF3D7_0207400 | organism=Plasmodium_falciparum_3D7 | gene_product=serine repeat antigen 7 | transcript_product=serine repeat antigen 7 | location=Pf3D7_02_v3:294273-297616(-) | protein_length=946 | sequence_SO=chromosome | SO=protein_coding | is_pseudo=false	16	16	16	16	16	16	16	16	16	16	16	16	192	168366	153814	168045	153493	148476	156344	120436	167153	150142	118107	177959	189216		160929	148102	158856	467888		1.01305	0.932305		0.90659	0.590897
transcript=PF3D7_0207500.1	>PF3D7_0207500.1-p1 | transcript=PF3D7_0207500.1 | gene=PF3D7_0207500 | organism=Plasmodium_falciparum_3D7 | gene_product=serine repeat antigen 6 | transcript_product=serine repeat antigen 6 | location=Pf3D7_02_v3:298897-302564(-) | protein_length=1031 | sequence_SO=chromosome | SO=protein_coding | is_pseudo=false	45	45	45	45	45	45	45	45	45	45	45	45	540	539024	565987	513146	445321	510031	488295	560130	457522	501333	464822	571341	462009		515869	503994	499876	1.51974e+06		1.03199	1.00824		0.674878	0.905932
transcript=PF3D7_0207600.1	>PF3D7_0207600.1-p1 | transcript=PF3D7_0207600.1 | gene=PF3D7_0207600 | organism=Plasmodium_falciparum_3D7 | gene_product=serine repeat antigen 5 | transcript_product=serine repeat antigen 5 | location=Pf3D7_02_v3:303593-307027(-) | protein_length=997 | sequence_SO=chromosome | SO=protein_coding | is_pseudo=false	57	57	57	57	57	57	57	57	57	57	57	57	684	11753612	14682437	12832551	14727086	12129487	10847603	10831361	11596091	14768458	11919854	10450950	12322722		1.34989e+07	1.13511e+07	12365496	37215553		1.09166	0.917968		0.366238	0.349815
transcript=PF3D7_0207700.1	>PF3D7_0207700.1-p1 | transcript=PF3D7_0207700.1 | gene=PF3D7_0207700 | organism=Plasmodium_falciparum_3D7 | gene_product=serine repeat antigen 4 | transcript_product=serine repeat antigen 4 | location=Pf3D7_02_v3:308847-312155(-) | protein_length=962 | sequence_SO=chromosome | SO=protein_coding | is_pseudo=false	29	29	29	29	29	29	29	29	29	29	29	29	348	532071	541760	482414	503127	488367	528733	495713	551998	503902	528557	550948	540144		514843	516203	530888	1.56193e+06		0.969777	0.97234		0.38227	0.447925
transcript=PF3D7_0207800.1	>PF3D7_0207800.1-p1 | transcript=PF3D7_0207800.1 | gene=PF3D7_0207800 | organism=Plasmodium_falciparum_3D7 | gene_product=serine repeat antigen 3 | transcript_product=serine repeat antigen 3 | location=Pf3D7_02_v3:313449-316741(-) | protein_length=930 | sequence_SO=chromosome | SO=protein_coding | is_pseudo=false	20	20	20	20	20	20	20	20	20	20	20	20	240	267071	264761	252357	271397	272122	251241	269788	277454	247202	259517	285572	262679		263897	267651	263742	795290		1.00058	1.01482		0.98706	0.706052
transcript=PF3D7_0208500.1	>PF3D7_0208500.1-p1 | transcript=PF3D7_0208500.1 | gene=PF3D7_0208500 | organism=Plasmodium_falciparum_3D7 | gene_product=acyl carrier protein | transcript_product=acyl carrier protein | location=Pf3D7_02_v3:352836-353628(+) | protein_length=137 | sequence_SO=chromosome | SO=protein_coding | is_pseudo=false	6	6	6	6	6	6	6	6	6	6	6	6	72	674533	637678	699789	926589	682478	615095	658844	823173	749295	701798	765284	673309		734647	694897	722422	2.15197e+06		1.01692	0.9619		0.868058	0.607627
transcript=PF3D7_0210200.1	>PF3D7_0210200.1-p1 | transcript=PF3D7_0210200.1 | gene=PF3D7_0210200 | organism=Plasmodium_falciparum_3D7 | gene_product=conserved Plasmodium protein, unknown function | transcript_product=conserved Plasmodium protein, unknown function | location=Pf3D7_02_v3:413278-421137(-) | protein_length=2588 | sequence_SO=chromosome | SO=protein_coding | is_pseudo=false	14	14	14	14	14	14	14	14	14	14	14	14	168	81413.9	112236	71583.4	49673.1	93388.9	95523.3	100620	90360.7	66377.2	113385	90817.1	96542.9		78726.5	94973.2	91780.7	265480		0.857768	1.03478		0.454215	0.767949
transcript=PF3D7_0209800.1	>PF3D7_0209800.1-p1 | transcript=PF3D7_0209800.1 | gene=PF3D7_0209800 | organism=Plasmodium_falciparum_3D7 | gene_product=ATP-dependent RNA helicase UAP56 | transcript_product=ATP-dependent RNA helicase UAP56 | location=Pf3D7_02_v3:404281-406355(-) | protein_length=457 | sequence_SO=chromosome | SO=protein_coding | is_pseudo=false	35	35	35	35	35	35	35	35	35	35	35	35	420	791109	735298	798385	732879	760699	745153	728088	824393	730822	822807	660670	716644		764418	764583	732736	2.26174e+06		1.04324	1.04346		0.445562	0.458136
transcript=PF3D7_0211200.1	>PF3D7_0211200.1-p1 | transcript=PF3D7_0211200.1 | gene=PF3D7_0211200 | organism=Plasmodium_falciparum_3D7 | gene_product=ras-related protein Rab-5A | transcript_product=ras-related protein Rab-5A | location=Pf3D7_02_v3:455579-456286(-) | protein_length=235 | sequence_SO=chromosome | SO=protein_coding | is_pseudo=false	4	4	4	4	4	4	4	4	4	4	4	4	48	47901.1	37555.8	31709.8	42188	40075.9	54405.2	49449.2	53218.6	51618.4	46754.3	41100.8	44985.2		39838.7	49287.2	46114.7	135241		0.863905	1.0688		0.182945	0.452552
transcript=PF3D7_0210100.1	>PF3D7_0210100.1-p1 | transcript=PF3D7_0210100.1 | gene=PF3D7_0210100 | organism=Plasmodium_falciparum_3D7 | gene_product=60S ribosomal protein L37ae, putative | transcript_product=60S ribosomal protein L37ae, putative | location=Pf3D7_02_v3:412275-412859(+) | protein_length=96 | sequence_SO=chromosome | SO=protein_coding | is_pseudo=false	4	4	4	4	4	4	4	4	4	4	4	4	48	746890	676523	521488	536864	728361	724452	767490	722479	700032	774806	713840	698513		620441	735695	721798	2.07793e+06		0.859578	1.01925		0.160227	0.536717
transcript=PF3D7_0212100.1	>PF3D7_0212100.1-p1 | transcript=PF3D7_0212100.1 | gene=PF3D7_0212100 | organism=Plasmodium_falciparum_3D7 | gene_product=conserved Plasmodium protein, unknown function | transcript_product=conserved Plasmodium protein, unknown function | location=Pf3D7_02_v3:483436-488970(+) | protein_length=1844 | sequence_SO=chromosome | SO=protein_coding | is_pseudo=false	29	29	29	29	29	29	29	29	29	29	29	29	348	96818.5	92202	90056.2	112187	98330.2	84755.2	105948	78181	88642.5	103368	102188	100725		97815.9	91803.7	98730.7	288350		0.990735	0.92984		0.885307	0.381964
transcript=PF3D7_0212300.1	>PF3D7_0212300.1-p1 | transcript=PF3D7_0212300.1 | gene=PF3D7_0212300 | organism=Plasmodium_falciparum_3D7 | gene_product=peptide chain release factor subunit 1, putative | transcript_product=peptide chain release factor subunit 1, putative | location=Pf3D7_02_v3:492616-494306(+) | protein_length=427 | sequence_SO=chromosome | SO=protein_coding | is_pseudo=false	20	20	20	20	20	20	20	20	20	20	20	20	240	80178.1	71628.8	71555	72936.9	61337.4	60417.9	56950.2	83216.8	57364.7	55041.2	67047.9	101866		74074.7	65480.6	70329.9	209885		1.05325	0.931048		0.755046	0.712339
transcript=PF3D7_0210900.1	>PF3D7_0210900.1-p1 | transcript=PF3D7_0210900.1 | gene=PF3D7_0210900 | organism=Plasmodium_falciparum_3D7 | gene_product=conserved Plasmodium protein, unknown function | transcript_product=conserved Plasmodium protein, unknown function | location=Pf3D7_02_v3:442080-442934(-) | protein_length=284 | sequence_SO=chromosome | SO=protein_coding | is_pseudo=false	10	10	10	10	10	10	10	10	10	10	10	10	120	622839	724621	521711	701683	681263	583044	594655	686001	642451	666432	680352	703430		642714	636241	673166	1.95212e+06		0.954762	0.945146		0.562104	0.286462
transcript=PF3D7_0211800.1	>PF3D7_0211800.1-p1 | transcript=PF3D7_0211800.1 | gene=PF3D7_0211800 | organism=Plasmodium_falciparum_3D7 | gene_product=asparagine--tRNA ligase | transcript_product=asparagine--tRNA ligase | location=Pf3D7_02_v3:475242-477074(+) | protein_length=610 | sequence_SO=chromosome | SO=protein_coding | is_pseudo=false	25	25	25	25	25	25	25	25	25	25	25	25	300	422640	444972	478036	449879	441717	464870	453746	423521	439055	389097	397220	491167		448882	445964	429135	1.32398e+06		1.04602	1.03922		0.486953	0.539364
transcript=PF3D7_0212400.1	>PF3D7_0212400.1-p1 | transcript=PF3D7_0212400.1 | gene=PF3D7_0212400 | organism=Plasmodium_falciparum_3D7 | gene_product=conserved Plasmodium membrane protein, unknown function | transcript_product=conserved Plasmodium membrane protein, unknown function | location=Pf3D7_02_v3:495166-507854(-) | protein_length=4091 | sequence_SO=chromosome | SO=protein_coding | is_pseudo=false	24	24	24	24	24	24	24	24	24	24	24	24	288	197068	155655	187481	158497	163531	207297	179122	165331	145415	185944	200670	213181		174675	178820	186303	539798		0.937589	0.959838		0.544901	0.691647
transcript=PF3D7_0212500.1	>PF3D7_0212500.1-p1 | transcript=PF3D7_0212500.1 | gene=PF3D7_0212500 | organism=Plasmodium_falciparum_3D7 | gene_product=conserved Plasmodium protein, unknown function | transcript_product=conserved Plasmodium protein, unknown function | location=Pf3D7_02_v3:509525-521746(+) | protein_length=3990 | sequence_SO=chromosome | SO=protein_coding | is_pseudo=false	35	35	35	35	35	35	35	35	35	35	35	35	420	100895	120170	96771.3	136047	114834	107324	91241.3	117103	128777	115991	135942	116380		113471	107626	124272	345369		0.913082	0.866045		0.347215	0.0731371
transcript=PF3D7_0213500.1	>PF3D7_0213500.1-p1 | transcript=PF3D7_0213500.1 | gene=PF3D7_0213500 | organism=Plasmodium_falciparum_3D7 | gene_product=tetratricopeptide repeat protein, putative | transcript_product=tetratricopeptide repeat protein, putative | location=Pf3D7_02_v3:543802-545895(-) | protein_length=460 | sequence_SO=chromosome | SO=protein_coding | is_pseudo=false	3	3	3	3	3	3	3	3	3	3	3	3	36	22772.6	14092.9	33110.2	23909.6	22818	30722.3	15228.1	38427.3	36023.5	25049.9	36933.2	17224.8		23471.3	26798.9	28807.8	79078.1		0.814755	0.930265		0.417144	0.779916
transcript=PF3D7_0212900.1	>PF3D7_0212900.1-p1 | transcript=PF3D7_0212900.1 | gene=PF3D7_0212900 | organism=Plasmodium_falciparum_3D7 | gene_product=arginyl-tRNA--protein transferase | transcript_product=arginyl-tRNA--protein transferase | location=Pf3D7_02_v3:533253-534350(+) | protein_length=365 | sequence_SO=chromosome | SO=protein_coding | is_pseudo=false	8	8	8	8	8	8	8	8	8	8	8	8	96	126605	139860	108615	106027	139960	117470	115492	131232	129150	110346	113042	119921		120277	126039	118115	364430		1.0183	1.06709		0.820764	0.315303
transcript=PF3D7_0213100.1	>PF3D7_0213100.1-p1 | transcript=PF3D7_0213100.1 | gene=PF3D7_0213100 | organism=Plasmodium_falciparum_3D7 | gene_product=protein SIS1 | transcript_product=protein SIS1 | location=Pf3D7_02_v3:537789-539420(+) | protein_length=328 | sequence_SO=chromosome | SO=protein_coding | is_pseudo=false	15	15	15	15	15	15	15	15	15	15	15	15	180	2.3367e+06	2.96118e+06	2392308	2.96819e+06	2.63512e+06	2.37623e+06	2.34969e+06	2.58507e+06	3.09755e+06	2.70057e+06	2.43132e+06	2393338		2.66459e+06	2.48653e+06	2.65569e+06	7.80681e+06		1.00335	0.9363		0.971358	0.393368
transcript=PF3D7_0213700.1	>PF3D7_0213700.1-p1 | transcript=PF3D7_0213700.1 | gene=PF3D7_0213700 | organism=Plasmodium_falciparum_3D7 | gene_product=conserved protein, unknown function | transcript_product=conserved protein, unknown function | location=Pf3D7_02_v3:557048-557696(+) | protein_length=154 | sequence_SO=chromosome | SO=protein_coding | is_pseudo=false	10	10	10	10	10	10	10	10	10	10	10	10	120	144395	150674	145118	201441	132014	102986	118464	156788	157427	149399	165819	89770.5		160407	127563	140604	428574		1.14084	0.90725		0.405942	0.555319
transcript=PF3D7_0214000.1	>PF3D7_0214000.1-p1 | transcript=PF3D7_0214000.1 | gene=PF3D7_0214000 | organism=Plasmodium_falciparum_3D7 | gene_product=T-complex protein 1 subunit theta | transcript_product=T-complex protein 1 subunit theta | location=Pf3D7_02_v3:566121-567894(+) | protein_length=542 | sequence_SO=chromosome | SO=protein_coding | is_pseudo=false	25	25	25	25	25	25	25	25	25	25	25	25	300	763278	823586	755720	611303	755187	843857	809695	769307	683799	742840	745878	841177		738472	794511	753423	2.28641e+06		0.980155	1.05454		0.797726	0.331941
transcript=PF3D7_0214900.1	>PF3D7_0214900.1-p1 | transcript=PF3D7_0214900.1 | gene=PF3D7_0214900 | organism=Plasmodium_falciparum_3D7 | gene_product=rhoptry neck protein 6 | transcript_product=rhoptry neck protein 6 | location=Pf3D7_02_v3:610625-615372(+) | protein_length=950 | sequence_SO=chromosome | SO=protein_coding | is_pseudo=false	21	21	21	21	21	21	21	21	21	21	21	21	252	38056.1	49034.3	38346.5	47714.2	54021.7	39620.5	19540.5	46101.6	49132.2	47378	43865.5	36535.1		43287.8	39821.1	44227.7	127337		0.978748	0.900365		0.824589	0.607147
transcript=PF3D7_0214100.1	>PF3D7_0214100.1-p1 | transcript=PF3D7_0214100.1 | gene=PF3D7_0214100 | organism=Plasmodium_falciparum_3D7 | gene_product=protein transport protein SEC31 | transcript_product=protein transport protein SEC31 | location=Pf3D7_02_v3:568529-573315(-) | protein_length=1471 | sequence_SO=chromosome | SO=protein_coding | is_pseudo=false	29	29	29	29	29	29	29	29	29	29	29	29	348	732026	841780	740720	911479	805312	768086	760452	711250	748034	800933	801385	824706		806501	761275	793764	2.36154e+06		1.01605	0.959069		0.79576	0.246868
transcript=PF3D7_0215800.1	>PF3D7_0215800.1-p1 | transcript=PF3D7_0215800.1 | gene=PF3D7_0215800 | organism=Plasmodium_falciparum_3D7 | gene_product=origin recognition complex subunit 5 | transcript_product=origin recognition complex subunit 5 | location=Pf3D7_02_v3:650663-653362(-) | protein_length=899 | sequence_SO=chromosome | SO=protein_coding | is_pseudo=false	6	6	6	6	6	6	6	6	6	6	6	6	72	50658	30917.4	20630	33943.4	22535.4	48531.8	24229.2	40653.2	22844.2	23152.4	27554.4	27780.9		34037.2	33987.4	25333	93357.6		1.34359	1.34163		0.258193	0.267145
transcript=PF3D7_0216400.1	>PF3D7_0216400.1-p1 | transcript=PF3D7_0216400.1 | gene=PF3D7_0216400 | organism=Plasmodium_falciparum_3D7 | gene_product=vacuolar protein sorting-associated protein 45 | transcript_product=vacuolar protein sorting-associated protein 45 | location=Pf3D7_02_v3:675431-677599(+) | protein_length=722 | sequence_SO=chromosome | SO=protein_coding | is_pseudo=false	10	10	10	10	10	10	10	10	10	10	10	10	120	18402.4	38151.5	17844	14771.3	17065.8	22896.7	36899.4	16935.5	16969.5	20107.9	26918.5	20190.2		22292.3	23449.3	21046.5	66788.2		1.05919	1.11417		0.839126	0.663692
transcript=PF3D7_0217100.1	>PF3D7_0217100.1-p1 | transcript=PF3D7_0217100.1 | gene=PF3D7_0217100 | organism=Plasmodium_falciparum_3D7 | gene_product=ATP synthase subunit alpha, mitochondrial | transcript_product=ATP synthase subunit alpha, mitochondrial | location=Pf3D7_02_v3:707738-709393(+) | protein_length=551 | sequence_SO=chromosome | SO=protein_coding | is_pseudo=false	20	20	20	20	20	20	20	20	20	20	20	20	240	39604.6	36062.3	51759	16351.8	43513.4	37295.6	47959.1	41953.8	40463	48203.4	25970.3	29387.5		35944.4	42680.5	36006.1	114631		0.998288	1.18537		0.994753	0.295214
transcript=PF3D7_0214400.1	>PF3D7_0214400.1-p1 | transcript=PF3D7_0214400.1 | gene=PF3D7_0214400 | organism=Plasmodium_falciparum_3D7 | gene_product=conserved protein, unknown function | transcript_product=conserved protein, unknown function | location=Pf3D7_02_v3:586765-589051(-) | protein_length=619 | sequence_SO=chromosome | SO=protein_coding | is_pseudo=false	7	7	7	7	7	7	7	7	7	7	7	7	84	345840	420963	474684	464164	401475	389635	412911	439910	492143	396995	411930	427709		426413	410983	432194	1.26959e+06		0.986623	0.950922		0.878172	0.413405
transcript=PF3D7_0215700.1	>PF3D7_0215700.1-p1 | transcript=PF3D7_0215700.1 | gene=PF3D7_0215700 | organism=Plasmodium_falciparum_3D7 | gene_product=DNA-directed RNA polymerase II subunit RPB2, putative | transcript_product=DNA-directed RNA polymerase II subunit RPB2, putative | location=Pf3D7_02_v3:645929-650085(+) | protein_length=1340 | sequence_SO=chromosome | SO=protein_coding | is_pseudo=false	45	45	45	45	45	45	45	45	45	45	45	45	540	167011	150952	167543	30568.4	169025	177800	175678	187102	139704	138531	154212	160891		129019	177401	148335	454754		0.869781	1.19595		0.602625	0.00634071
transcript=PF3D7_0217900.1	>PF3D7_0217900.1-p1 | transcript=PF3D7_0217900.1 | gene=PF3D7_0217900 | organism=Plasmodium_falciparum_3D7 | gene_product=conserved Plasmodium protein, unknown function | transcript_product=conserved Plasmodium protein, unknown function | location=Pf3D7_02_v3:735438-736997(-) | protein_length=519 | sequence_SO=chromosome | SO=protein_coding | is_pseudo=false	12	12	12	12	12	12	12	12	12	12	12	12	144	28955.2	212632	33085.8	31905.7	236792	252350	33636.2	29969.2	24817	28820.7	199744	28769.4		76644.6	138187	70537.7	285369		1.08658	1.95905		0.9254	0.406228
transcript=PF3D7_0217500.1	>PF3D7_0217500.1-p1 | transcript=PF3D7_0217500.1 | gene=PF3D7_0217500 | organism=Plasmodium_falciparum_3D7 | gene_product=calcium-dependent protein kinase 1 | transcript_product=calcium-dependent protein kinase 1 | location=Pf3D7_02_v3:720437-722661(+) | protein_length=524 | sequence_SO=chromosome | SO=protein_coding | is_pseudo=false	26	26	26	26	26	26	26	26	26	26	26	26	312	238344	286238	343508	364605	228564	241733	314933	285852	336565	287608	231188	270481		308174	267771	281461	857405		1.09491	0.951361		0.48741	0.659773
transcript=PF3D7_0217800.1	>PF3D7_0217800.1-p1 | transcript=PF3D7_0217800.1 | gene=PF3D7_0217800 | organism=Plasmodium_falciparum_3D7 | gene_product=40S ribosomal protein S26 | transcript_product=40S ribosomal protein S26 | location=Pf3D7_02_v3:734272-734595(+) | protein_length=107 | sequence_SO=chromosome | SO=protein_coding | is_pseudo=false	5	5	5	5	5	5	5	5	5	5	5	5	60	406111	394649	364293	320479	461111	337964	432293	466161	356373	481957	463687	147834		371383	424382	362463	1.15823e+06		1.02461	1.17083		0.916563	0.494803
transcript=PF3D7_0218000.1	>PF3D7_0218000.1-p1 | transcript=PF3D7_0218000.1 | gene=PF3D7_0218000 | organism=Plasmodium_falciparum_3D7 | gene_product=replication factor C subunit 2, putative | transcript_product=replication factor C subunit 2, putative | location=Pf3D7_02_v3:738860-739852(+) | protein_length=330 | sequence_SO=chromosome | SO=protein_coding | is_pseudo=false	22	22	22	22	22	22	22	22	22	22	22	22	264	135160	67436.5	121042	70518.6	126241	141060	132856	106235	97342.3	106518	97143.1	115786		98539.4	126598	104197	329335		0.945699	1.21498		0.77016	0.049971
transcript=PF3D7_0218200.1	>PF3D7_0218200.1-p1 | transcript=PF3D7_0218200.1 | gene=PF3D7_0218200 | organism=Plasmodium_falciparum_3D7 | gene_product=SUZ domain-containing protein, putative | transcript_product=SUZ domain-containing protein, putative | location=Pf3D7_02_v3:743289-745712(-) | protein_length=807 | sequence_SO=chromosome | SO=protein_coding | is_pseudo=false	8	8	8	8	8	8	8	8	8	8	8	8	96	224614	252078	238296	267822	17843.5	225749	229212	223554	238801	215554	230108	237841		245703	174089	230576	650368		1.0656	0.755019		0.219026	0.35828
transcript=PF3D7_0218500.1	>PF3D7_0218500.1-p1 | transcript=PF3D7_0218500.1 | gene=PF3D7_0218500 | organism=Plasmodium_falciparum_3D7 | gene_product=small nuclear ribonucleoprotein Sm D2, putative | transcript_product=small nuclear ribonucleoprotein Sm D2, putative | location=Pf3D7_02_v3:752966-753439(+) | protein_length=101 | sequence_SO=chromosome | SO=protein_coding | is_pseudo=false	6	6	6	6	6	6	6	6	6	6	6	6	72	1.2653e+06	1.38777e+06	1.20499e+06	1.37055e+06	1.27147e+06	1.19934e+06	1.17825e+06	1.26995e+06	1.36476e+06	1.28107e+06	1.32707e+06	1.33544e+06		1.30715e+06	1.22975e+06	1327084	3.86399e+06		0.98498	0.926658		0.692618	0.019223
transcript=PF3D7_0219400.1	>PF3D7_0219400.1-p1 | transcript=PF3D7_0219400.1 | gene=PF3D7_0219400 | organism=Plasmodium_falciparum_3D7 | gene_product=ribosome associated membrane protein RAMP4, putative, unspecified product | transcript_product=ribosome associated membrane protein RAMP4, putative | location=Pf3D7_02_v3:774815-776036(+) | protein_length=101 | sequence_SO=chromosome | SO=protein_coding | is_pseudo=false	9	9	9	9	9	9	9	9	9	9	9	9	108	325742	351216	339937	379287	290880	282302	315289	334114	315865	306647	388225	257324		349045	305646	317015	971707		1.10104	0.964137		0.335046	0.718663
transcript=PF3D7_0220100.1	>PF3D7_0220100.1-p1 | transcript=PF3D7_0220100.1 | gene=PF3D7_0220100 | organism=Plasmodium_falciparum_3D7 | gene_product=DnaJ protein, putative | transcript_product=DnaJ protein, putative | location=Pf3D7_02_v3:804520-807741(+) | protein_length=997 | sequence_SO=chromosome | SO=protein_coding | is_pseudo=false	10	10	10	10	10	10	10	10	10	10	10	10	120	49140.4	48902.6	54392.9	51154	56042.9	44059.5	50623	44773.9	48562.1	50891.9	55969.5	50903.7		50897.5	48874.8	51581.8	151354		0.986733	0.947521		0.746028	0.440044
transcript=PF3D7_0219600.1	>PF3D7_0219600.1-p1 | transcript=PF3D7_0219600.1 | gene=PF3D7_0219600 | organism=Plasmodium_falciparum_3D7 | gene_product=replication factor C subunit 1, putative | transcript_product=replication factor C subunit 1, putative | location=Pf3D7_02_v3:779418-782132(-) | protein_length=904 | sequence_SO=chromosome | SO=protein_coding | is_pseudo=false	22	22	22	22	22	22	22	22	22	22	22	22	264	330256	332662	355429	396302	345478	318516	377794	360440	357847	347910	359862	335830		353662	350557	350362	1.05458e+06		1.00942	1.00055		0.849695	0.989346
transcript=PF3D7_0220800.1	>PF3D7_0220800.1-p1 | transcript=PF3D7_0220800.1 | gene=PF3D7_0220800 | organism=Plasmodium_falciparum_3D7 | gene_product=cytoadherence linked asexual protein 2 | transcript_product=cytoadherence linked asexual protein 2 | location=Pf3D7_02_v3:838843-844116(+) | protein_length=1440 | sequence_SO=chromosome | SO=protein_coding | is_pseudo=false	8	8	8	8	8	8	8	8	8	8	8	8	96	75870.1	69960.3	83255.4	16604.9	28202.4	37627.7	21942.5	21775.6	27792.8	30327.6	21031.6	26299.9		61422.7	27387	26363	115173		2.32988	1.03885		0.103123	0.818475
transcript=PF3D7_0301400.1	>PF3D7_0301400.1-p1 | transcript=PF3D7_0301400.1 | gene=PF3D7_0301400 | organism=Plasmodium_falciparum_3D7 | gene_product=Plasmodium exported protein, unknown function | transcript_product=Plasmodium exported protein, unknown function | location=Pf3D7_03_v3:85305-86131(-) | protein_length=243 | sequence_SO=chromosome | SO=protein_coding | is_pseudo=false	3	3	3	3	3	3	3	3	3	3	3	3	36	57469.9	71609.1	56283	57987.2	69807	19950.1	61406.5	15831.5	16271.2	18655.6	65743.6	57402.7		60837.3	41748.8	39518.3	142104		1.53947	1.05644		0.196291	0.91011
transcript=PF3D7_0301600.1	>PF3D7_0301600.1-p1 | transcript=PF3D7_0301600.1 | gene=PF3D7_0301600 | organism=Plasmodium_falciparum_3D7 | gene_product=Plasmodium exported protein (hyp1), unknown function | transcript_product=Plasmodium exported protein (hyp1), unknown function | location=Pf3D7_03_v3:91115-93463(-) | protein_length=732 | sequence_SO=chromosome | SO=protein_coding | is_pseudo=false	10	10	10	10	10	10	10	10	10	10	10	10	120	65712.2	38625.2	60551.4	85392.4	42734.2	70258.9	26794.2	38158.9	51264.9	42402.6	40686.2	38772.3		62570.3	44486.5	43281.5	150338		1.44566	1.02784		0.136217	0.907167
transcript=PF3D7_0220000.1	>PF3D7_0220000.1-p1 | transcript=PF3D7_0220000.1 | gene=PF3D7_0220000 | organism=Plasmodium_falciparum_3D7 | gene_product=liver stage antigen 3 | transcript_product=liver stage antigen 3 | location=Pf3D7_02_v3:796752-801586(+) | protein_length=1558 | sequence_SO=chromosome | SO=protein_coding | is_pseudo=false	54	54	54	54	54	54	54	54	54	54	54	54	648	6.59975e+06	7.12182e+06	6.82013e+06	8464359	7.36797e+06	6455254	6.66856e+06	7.00821e+06	7517392	7.46024e+06	6944023	7.40697e+06		7.25151e+06	6.875e+06	7332156	2.14587e+07		0.989001	0.93765		0.863958	0.112157
transcript=PF3D7_0220600.1	>PF3D7_0220600.1-p1 | transcript=PF3D7_0220600.1 | gene=PF3D7_0220600 | organism=Plasmodium_falciparum_3D7 | gene_product=Plasmodium exported protein (hyp9), unknown function | transcript_product=Plasmodium exported protein (hyp9), unknown function | location=Pf3D7_02_v3:831189-832005(+) | protein_length=225 | sequence_SO=chromosome | SO=protein_coding | is_pseudo=false	8	8	8	8	8	8	8	8	8	8	8	8	96	134026	149381	120723	155869	130513	110645	107700	162027	141970	152138	163278	82630.4		140000	127721	135004	402725		1.037	0.946055		0.811495	0.752241
transcript=PF3D7_0301700.1	>PF3D7_0301700.1-p1 | transcript=PF3D7_0301700.1 | gene=PF3D7_0301700 | organism=Plasmodium_falciparum_3D7 | gene_product=Plasmodium exported protein, unknown function | transcript_product=Plasmodium exported protein, unknown function | location=Pf3D7_03_v3:96568-97907(-) | protein_length=317 | sequence_SO=chromosome | SO=protein_coding | is_pseudo=false	7	7	7	7	7	7	7	7	7	7	7	7	84	716787	744974	784072	1.06968e+06	734621	735266	759780	823720	915394	787743	735358	778581		828877	763347	804269	2.39649e+06		1.0306	0.949119		0.797613	0.399029
transcript=PF3D7_0302000.1	>PF3D7_0302000.1-p1 | transcript=PF3D7_0302000.1 | gene=PF3D7_0302000 | organism=Plasmodium_falciparum_3D7 | gene_product=pre-mRNA-splicing factor PRP46, putative | transcript_product=pre-mRNA-splicing factor PRP46, putative | location=Pf3D7_03_v3:107961-109880(-) | protein_length=600 | sequence_SO=chromosome | SO=protein_coding | is_pseudo=false	11	11	11	11	11	11	11	11	11	11	11	11	132	220777	201058	137970	319677	257275	167810	182520	20275.1	361395	257318	761249	229003		219870	156970	402241	779082		0.546614	0.390239		0.237627	0.139002
transcript=PF3D7_0302500.1	>PF3D7_0302500.1-p1 | transcript=PF3D7_0302500.1 | gene=PF3D7_0302500 | organism=Plasmodium_falciparum_3D7 | gene_product=cytoadherence linked asexual protein 3.1 | transcript_product=cytoadherence linked asexual protein 3.1 | location=Pf3D7_03_v3:135418-140660(+) | protein_length=1417 | sequence_SO=chromosome | SO=protein_coding | is_pseudo=false	37	37	37	37	37	37	37	37	37	37	37	37	444	736642	710029	538429	370624	567437	553922	617915	479941	475853	507921	543048	569115		588931	554804	523985	1.66772e+06		1.12395	1.05882		0.506215	0.416169
transcript=PF3D7_0302800.1	>PF3D7_0302800.1-p1 | transcript=PF3D7_0302800.1 | gene=PF3D7_0302800 | organism=Plasmodium_falciparum_3D7 | gene_product=RNA-binding protein, putative | transcript_product=RNA-binding protein, putative | location=Pf3D7_03_v3:148046-149305(-) | protein_length=419 | sequence_SO=chromosome | SO=protein_coding | is_pseudo=false	9	9	9	9	9	9	9	9	9	9	9	9	108	215103	213386	188002	284843	249918	171924	220499	210670	177325	173886	228074	119716		225334	213253	174750	613337		1.28946	1.22033		0.146955	0.21364
transcript=PF3D7_0303200.1	>PF3D7_0303200.1-p1 | transcript=PF3D7_0303200.1 | gene=PF3D7_0303200 | organism=Plasmodium_falciparum_3D7 | gene_product=HAD superfamily protein, putative | transcript_product=HAD superfamily protein, putative | location=Pf3D7_03_v3:169571-174300(+) | protein_length=1162 | sequence_SO=chromosome | SO=protein_coding | is_pseudo=false	17	17	17	17	17	17	17	17	17	17	17	17	204	85988.5	48203.5	94087.5	109428	91833	87467.3	89137.1	105492	99247.4	97828.9	96003.6	82364		84426.8	93482.3	93861	271770		0.899487	0.995966		0.530334	0.948783
transcript=PF3D7_0302900.1	>PF3D7_0302900.1-p1 | transcript=PF3D7_0302900.1 | gene=PF3D7_0302900 | organism=Plasmodium_falciparum_3D7 | gene_product=exportin-1, putative | transcript_product=exportin-1, putative | location=Pf3D7_03_v3:152168-156146(-) | protein_length=1254 | sequence_SO=chromosome | SO=protein_coding | is_pseudo=false	42	42	42	42	42	42	42	42	42	42	42	42	504	382292	446517	358989	288067	384848	397252	393823	421144	410180	398775	397012	404370		368966	399267	402584	1.17082e+06		0.916495	0.99176		0.380224	0.710464
transcript=PF3D7_0303000.1	>PF3D7_0303000.1-p1 | transcript=PF3D7_0303000.1 | gene=PF3D7_0303000 | organism=Plasmodium_falciparum_3D7 | gene_product=N-ethylmaleimide-sensitive fusion protein | transcript_product=N-ethylmaleimide-sensitive fusion protein | location=Pf3D7_03_v3:159353-161704(-) | protein_length=783 | sequence_SO=chromosome | SO=protein_coding | is_pseudo=false	23	23	23	23	23	23	23	23	23	23	23	23	276	489415	545306	518001	579274	461739	514812	521724	534195	522532	523019	496219	574960		532999	508117	529183	1.5703e+06		1.00721	0.960193		0.885156	0.394292
transcript=PF3D7_0304400.1	>PF3D7_0304400.1-p1 | transcript=PF3D7_0304400.1 | gene=PF3D7_0304400 | organism=Plasmodium_falciparum_3D7 | gene_product=60S ribosomal protein L44 | transcript_product=60S ribosomal protein L44 | location=Pf3D7_03_v3:217941-218489(+) | protein_length=104 | sequence_SO=chromosome | SO=protein_coding | is_pseudo=false	3	3	3	3	3	3	3	3	3	3	3	3	36	86574.5	74589.8	87347.4	70760.4	92254	101046	91280.6	71014.4	53895.2	91468.4	100552	91580.5		79818	88898.8	84374	253091		0.946003	1.05363		0.705152	0.725364
transcript=PF3D7_0305100.1	>PF3D7_0305100.1-p1 | transcript=PF3D7_0305100.1 | gene=PF3D7_0305100 | organism=Plasmodium_falciparum_3D7 | gene_product=conserved Plasmodium protein, unknown function | transcript_product=conserved Plasmodium protein, unknown function | location=Pf3D7_03_v3:236334-248270(-) | protein_length=3978 | sequence_SO=chromosome | SO=protein_coding | is_pseudo=false	3	3	3	3	3	3	3	3	3	3	3	3	36	130485	103743	91271.9	54015.5	98032.8	99081.5	104163	82789.7	56086.4	82808.9	68431.7	95328.2		94878.7	96016.6	75663.8	266559		1.25395	1.26899		0.339376	0.0945195
transcript=PF3D7_0305200.1	>PF3D7_0305200.1-p1 | transcript=PF3D7_0305200.1 | gene=PF3D7_0305200 | organism=Plasmodium_falciparum_3D7 | gene_product=conserved Plasmodium protein, unknown function | transcript_product=conserved Plasmodium protein, unknown function | location=Pf3D7_03_v3:251242-254661(+) | protein_length=1139 | sequence_SO=chromosome | SO=protein_coding | is_pseudo=false	19	19	19	19	19	19	19	19	19	19	19	19	228	76880.6	80590.7	77548.3	94060	81819.9	73050.5	71998.8	74469.3	81081.4	77492.1	81286.3	75038.9		82269.9	75334.6	78724.7	236329		1.04503	0.956938		0.45652	0.259309
transcript=PF3D7_0303300.1	>PF3D7_0303300.1-p1 | transcript=PF3D7_0303300.1 | gene=PF3D7_0303300 | organism=Plasmodium_falciparum_3D7 | gene_product=DNA-directed RNA polymerases I, II, and III subunit RPABC2, putative | transcript_product=DNA-directed RNA polymerases I, II, and III subunit RPABC2, putative | location=Pf3D7_03_v3:175022-175799(-) | protein_length=153 | sequence_SO=chromosome | SO=protein_coding | is_pseudo=…	8	8	8	8	8	8	8	8	8	8	8	8	96	134450	167123	150059	174782	151450	179345	158575	155184	152312	164941	162498	169293		156604	161139	162261	480003		0.965137	0.993084		0.591768	0.88257
transcript=PF3D7_0303700.1	>PF3D7_0303700.1-p1 | transcript=PF3D7_0303700.1 | gene=PF3D7_0303700 | organism=Plasmodium_falciparum_3D7 | gene_product=lipoamide acyltransferase component of branched-chain alpha-keto acid dehydrogenase complex | transcript_product=lipoamide acyltransferase component of branched-chain alpha-keto acid dehydrogenase complex | location=Pf3D7_03_v3:191245-192591(-) | protein_length=448 | sequence_…	8	8	8	8	8	8	8	8	8	8	8	8	96	608252	465305	439645	574578	579116	500986	470611	560625	631878	636657	608450	562947		521945	527834	609983	1.65976e+06		0.855672	0.865327		0.118422	0.0409229
transcript=PF3D7_0305300.1	>PF3D7_0305300.1-p1 | transcript=PF3D7_0305300.1 | gene=PF3D7_0305300 | organism=Plasmodium_falciparum_3D7 | gene_product=conserved Plasmodium membrane protein, unknown function | transcript_product=conserved Plasmodium membrane protein, unknown function | location=Pf3D7_03_v3:255276-258416(-) | protein_length=956 | sequence_SO=chromosome | SO=protein_coding | is_pseudo=false	11	11	11	11	11	11	11	11	11	11	11	11	132	573724	693681	602923	747058	656739	637296	554722	629764	601022	634554	573311	644847		654346	619630	613433	1.88741e+06		1.0667	1.0101		0.398485	0.831016
transcript=PF3D7_0305500.1	>PF3D7_0305500.1-p1 | transcript=PF3D7_0305500.1 | gene=PF3D7_0305500 | organism=Plasmodium_falciparum_3D7 | gene_product=conserved Plasmodium protein, unknown function | transcript_product=conserved Plasmodium protein, unknown function | location=Pf3D7_03_v3:261485-273286(-) | protein_length=3933 | sequence_SO=chromosome | SO=protein_coding | is_pseudo=false	29	29	29	29	29	29	29	29	29	29	29	29	348	269031	313621	285370	310617	280579	256164	265537	275374	279602	261354	260198	289924		294660	269414	272770	836843		1.08025	0.987696		0.146409	0.724124
transcript=PF3D7_0306100.1	>PF3D7_0306100.1-p1 | transcript=PF3D7_0306100.1 | gene=PF3D7_0306100 | organism=Plasmodium_falciparum_3D7 | gene_product=conserved Plasmodium protein, unknown function | transcript_product=conserved Plasmodium protein, unknown function | location=Pf3D7_03_v3:288637-290747(-) | protein_length=628 | sequence_SO=chromosome | SO=protein_coding | is_pseudo=false	14	14	14	14	14	14	14	14	14	14	14	14	168	89788.4	120425	87772.2	96172.6	104340	89076.6	88873.6	96315.4	108433	101652	92247.6	97750.2		98539.6	94651.4	100021	293212		0.985193	0.946319		0.865847	0.324456
transcript=PF3D7_0305600.1	>PF3D7_0305600.1-p1 | transcript=PF3D7_0305600.1 | gene=PF3D7_0305600 | organism=Plasmodium_falciparum_3D7 | gene_product=DNA-(apurinic or apyrimidinic site) lyase, putative | transcript_product=DNA-(apurinic or apyrimidinic site) lyase, putative | location=Pf3D7_03_v3:275864-277717(-) | protein_length=617 | sequence_SO=chromosome | SO=protein_coding | is_pseudo=false	21	21	21	21	21	21	21	21	21	21	21	21	252	191967	209569	170737	214288	200388	163590	176759	182650	216077	202804	198207	173614		196640	180847	197675	575163		0.994763	0.914867		0.940421	0.201575
transcript=PF3D7_0305700.1	>PF3D7_0305700.1-p1 | transcript=PF3D7_0305700.1 | gene=PF3D7_0305700 | organism=Plasmodium_falciparum_3D7 | gene_product=ubiquitin-conjugating enzyme E2, putative | transcript_product=ubiquitin-conjugating enzyme E2, putative | location=Pf3D7_03_v3:278956-279828(-) | protein_length=142 | sequence_SO=chromosome | SO=protein_coding | is_pseudo=false	8	8	8	8	8	8	8	8	8	8	8	8	96	728230	723016	644805	646852	729795	743171	709938	753508	761888	652977	731377	830357		685726	734103	744150	2.16398e+06		0.921489	0.986499		0.235597	0.806516
transcript=PF3D7_0306400.1	>PF3D7_0306400.1-p1 | transcript=PF3D7_0306400.1 | gene=PF3D7_0306400 | organism=Plasmodium_falciparum_3D7 | gene_product=FAD-dependent glycerol-3-phosphate dehydrogenase, putative | transcript_product=FAD-dependent glycerol-3-phosphate dehydrogenase, putative | location=Pf3D7_03_v3:298517-300478(+) | protein_length=653 | sequence_SO=chromosome | SO=protein_coding | is_pseudo=false	25	25	25	25	25	25	25	25	25	25	25	25	300	21550.8	23372.1	49376.1	18036.8	81307.8	21591.6	63838.6	18995.1	16516.8	25922.6	61417.4	20415		28084	46433.3	31068	105585		0.903953	1.49457		0.820975	0.445434
transcript=PF3D7_0306200.1	>PF3D7_0306200.1-p1 | transcript=PF3D7_0306200.1 | gene=PF3D7_0306200 | organism=Plasmodium_falciparum_3D7 | gene_product=activator of Hsp90 ATPase | transcript_product=activator of Hsp90 ATPase | location=Pf3D7_03_v3:292943-294548(+) | protein_length=349 | sequence_SO=chromosome | SO=protein_coding | is_pseudo=false	10	10	10	10	10	10	10	10	10	10	10	10	120	173197	175715	164339	192037	158588	155554	166788	165016	166821	175934	177588	168088		176322	161486	172108	509916		1.02449	0.938287		0.543268	0.0312746
transcript=PF3D7_0306300.1	>PF3D7_0306300.1-p1 | transcript=PF3D7_0306300.1 | gene=PF3D7_0306300 | organism=Plasmodium_falciparum_3D7 | gene_product=glutaredoxin 1 | transcript_product=glutaredoxin 1 | location=Pf3D7_03_v3:295107-296094(-) | protein_length=111 | sequence_SO=chromosome | SO=protein_coding | is_pseudo=false	12	12	12	12	12	12	12	12	12	12	12	12	144	1.65904e+06	1914162	1.58549e+06	2065077	1686318	1.61035e+06	1.51386e+06	1.7058e+06	1.76701e+06	1.86631e+06	1.89538e+06	1.58071e+06		1.80594e+06	1.62908e+06	1.77735e+06	5.21238e+06		1.01609	0.916578		0.837148	0.135744
transcript=PF3D7_0306800.1	>PF3D7_0306800.1-p1 | transcript=PF3D7_0306800.1 | gene=PF3D7_0306800 | organism=Plasmodium_falciparum_3D7 | gene_product=T-complex protein 1 subunit beta | transcript_product=T-complex protein 1 subunit beta | location=Pf3D7_03_v3:306108-307984(-) | protein_length=533 | sequence_SO=chromosome | SO=protein_coding | is_pseudo=false	58	58	58	58	58	58	58	58	58	58	58	58	696	997148	1.06026e+06	958811	906344	1.06967e+06	1055500	1.07193e+06	1.0386e+06	976355	963767	1.0259e+06	1.12698e+06		980641	1.05892e+06	1.02325e+06	3.06282e+06		0.958358	1.03486		0.420797	0.410726
transcript=PF3D7_0306900.1	>PF3D7_0306900.1-p1 | transcript=PF3D7_0306900.1 | gene=PF3D7_0306900 | organism=Plasmodium_falciparum_3D7 | gene_product=40S ribosomal protein S23, putative | transcript_product=40S ribosomal protein S23, putative | location=Pf3D7_03_v3:310652-311805(+) | protein_length=145 | sequence_SO=chromosome | SO=protein_coding | is_pseudo=false	3	3	3	3	3	3	3	3	3	3	3	3	36	382940	303815	340587	310788	338294	343510	344150	330095	312838	341577	355641	299176		334532	339012	327308	1.00085e+06		1.02207	1.03576		0.756613	0.438083
transcript=PF3D7_0307500.1	>PF3D7_0307500.1-p1 | transcript=PF3D7_0307500.1 | gene=PF3D7_0307500 | organism=Plasmodium_falciparum_3D7 | gene_product=spindle and kinetochore-associated protein 2, putative | transcript_product=spindle and kinetochore-associated protein 2, putative | location=Pf3D7_03_v3:322933-324836(-) | protein_length=389 | sequence_SO=chromosome | SO=protein_coding | is_pseudo=false	13	13	13	13	13	13	13	13	13	13	13	13	156	19373.1	17229.2	21858.1	14712.9	19199.8	77076.8	21145.4	14737.3	10654.5	14680.5	21939	21561.8		18293.3	33039.8	17209	68542.1		1.06301	1.91992		0.744998	0.363992
transcript=PF3D7_0307100.1	>PF3D7_0307100.1-p1 | transcript=PF3D7_0307100.1 | gene=PF3D7_0307100 | organism=Plasmodium_falciparum_3D7 | gene_product=40S ribosomal protein S12, putative | transcript_product=40S ribosomal protein S12, putative | location=Pf3D7_03_v3:312693-313342(-) | protein_length=141 | sequence_SO=chromosome | SO=protein_coding | is_pseudo=false	17	17	17	17	17	17	17	17	17	17	17	17	204	4034342	4.57291e+06	3.54101e+06	5579885	3.6225e+06	3.34795e+06	3425594	3.69481e+06	4.66971e+06	4.24845e+06	3655617	3318504		4.43204e+06	3.52271e+06	3.97307e+06	1.19278e+07		1.11552	0.886647		0.424351	0.233766
transcript=PF3D7_0307200.1	>PF3D7_0307200.1-p1 | transcript=PF3D7_0307200.1 | gene=PF3D7_0307200 | organism=Plasmodium_falciparum_3D7 | gene_product=60S ribosomal protein L7, putative | transcript_product=60S ribosomal protein L7, putative | location=Pf3D7_03_v3:314976-316236(-) | protein_length=257 | sequence_SO=chromosome | SO=protein_coding | is_pseudo=false	15	15	15	15	15	15	15	15	15	15	15	15	180	898383	905010	717144	744354	926470	747471	900974	931679	964463	916746	921912	716082		816223	876648	879801	2.57267e+06		0.927736	0.996417		0.426988	0.96594
transcript=PF3D7_0308100.1	>PF3D7_0308100.1-p1 | transcript=PF3D7_0308100.1 | gene=PF3D7_0308100 | organism=Plasmodium_falciparum_3D7 | gene_product=zinc finger protein, putative | transcript_product=zinc finger protein, putative | location=Pf3D7_03_v3:356319-361454(+) | protein_length=1711 | sequence_SO=chromosome | SO=protein_coding | is_pseudo=false	16	16	16	16	16	16	16	16	16	16	16	16	192	15096.5	23922.5	14457.7	27235.5	14786.9	29760.2	16732.3	19264.3	18377.1	12506	15185.6	34870.4		20178	20135.9	20234.8	60548.8		0.997195	0.995112		0.992755	0.987524
transcript=PF3D7_0307700.1	>PF3D7_0307700.1-p1 | transcript=PF3D7_0307700.1 | gene=PF3D7_0307700 | organism=Plasmodium_falciparum_3D7 | gene_product=conserved Plasmodium protein, unknown function | transcript_product=conserved Plasmodium protein, unknown function | location=Pf3D7_03_v3:328787-335269(-) | protein_length=1826 | sequence_SO=chromosome | SO=protein_coding | is_pseudo=false	27	27	27	27	27	27	27	27	27	27	27	27	324	142378	176342	147038	167378	151258	155201	147008	144563	158968	160667	147642	164487		158284	149508	157941	465733		1.00217	0.946603		0.970976	0.106541
transcript=PF3D7_0308300.1	>PF3D7_0308300.1-p1 | transcript=PF3D7_0308300.1 | gene=PF3D7_0308300 | organism=Plasmodium_falciparum_3D7 | gene_product=conserved Plasmodium protein, unknown function | transcript_product=conserved Plasmodium protein, unknown function | location=Pf3D7_03_v3:365659-366672(-) | protein_length=337 | sequence_SO=chromosome | SO=protein_coding | is_pseudo=false	12	12	12	12	12	12	12	12	12	12	12	12	144	19617.4	29670	30474.1	95055.1	18782.2	72706.1	21140.8	17552.7	19714.6	47463.5	12821.6	69759.4		43704.1	32545.5	37439.8	113689		1.16732	0.869276		0.78329	0.802887
transcript=PF3D7_0308600.1	>PF3D7_0308600.1-p1 | transcript=PF3D7_0308600.1 | gene=PF3D7_0308600 | organism=Plasmodium_falciparum_3D7 | gene_product=pre-mRNA-processing factor 19, putative | transcript_product=pre-mRNA-processing factor 19, putative | location=Pf3D7_03_v3:372632-374230(+) | protein_length=532 | sequence_SO=chromosome | SO=protein_coding | is_pseudo=false	11	11	11	11	11	11	11	11	11	11	11	11	132	85113	95357.7	64151.5	28454.8	77178.1	70755.6	67998.3	18583.4	81363.4	17272.8	81003.9	80214.3		68269.3	58628.9	64963.6	191862		1.05089	0.902488		0.883964	0.771768
transcript=PF3D7_0308700.1	>PF3D7_0308700.1-p1 | transcript=PF3D7_0308700.1 | gene=PF3D7_0308700 | organism=Plasmodium_falciparum_3D7 | gene_product=conserved protein, unknown function | transcript_product=conserved protein, unknown function | location=Pf3D7_03_v3:375806-377437(+) | protein_length=492 | sequence_SO=chromosome | SO=protein_coding | is_pseudo=false	7	7	7	7	7	7	7	7	7	7	7	7	84	34886.6	48556.2	17269.1	54090.6	44347.5	39792	55067.7	33974.3	56978.5	38081.2	45641.2	46475.1		38700.6	43295.4	46794	128790		0.827043	0.925234		0.419925	0.576215
transcript=PF3D7_0308000.1	>PF3D7_0308000.1-p1 | transcript=PF3D7_0308000.1 | gene=PF3D7_0308000 | organism=Plasmodium_falciparum_3D7 | gene_product=DNA polymerase delta small subunit, putative | transcript_product=DNA polymerase delta small subunit, putative | location=Pf3D7_03_v3:353549-355045(+) | protein_length=498 | sequence_SO=chromosome | SO=protein_coding | is_pseudo=false	5	5	5	5	5	5	5	5	5	5	5	5	60	101255	139999	91746	101488	105676	141499	141786	146576	96387.7	134570	101434	118973		108622	133884	112841	355347		0.962612	1.18649		0.77055	0.153507
transcript=PF3D7_0309300.1	>PF3D7_0309300.1-p1 | transcript=PF3D7_0309300.1 | gene=PF3D7_0309300 | organism=Plasmodium_falciparum_3D7 | gene_product=N2227-like protein, putative | transcript_product=N2227-like protein, putative | location=Pf3D7_03_v3:397649-400516(+) | protein_length=955 | sequence_SO=chromosome | SO=protein_coding | is_pseudo=false	11	11	11	11	11	11	11	11	11	11	11	11	132	95997.1	95965.4	87421.7	78773	75677.7	109039	96303.6	81113.4	78747.7	88480	93769.4	101003		89539.3	90533.5	90500.1	270573		0.989384	1.00037		0.88268	0.997144
transcript=PF3D7_0308200.1	>PF3D7_0308200.1-p1 | transcript=PF3D7_0308200.1 | gene=PF3D7_0308200 | organism=Plasmodium_falciparum_3D7 | gene_product=T-complex protein 1 subunit eta | transcript_product=T-complex protein 1 subunit eta | location=Pf3D7_03_v3:362342-364233(-) | protein_length=539 | sequence_SO=chromosome | SO=protein_coding | is_pseudo=false	24	24	24	24	24	24	24	24	24	24	24	24	288	491463	445383	492197	411548	447115	514114	502821	452367	472458	466509	476947	501889		460148	479104	479451	1.4187e+06		0.95974	0.999277		0.4118	0.98616
transcript=PF3D7_0309200.1	>PF3D7_0309200.1-p1 | transcript=PF3D7_0309200.1 | gene=PF3D7_0309200 | organism=Plasmodium_falciparum_3D7 | gene_product=serine/threonine protein kinase, putative | transcript_product=serine/threonine protein kinase, putative | location=Pf3D7_03_v3:389137-394604(-) | protein_length=1650 | sequence_SO=chromosome | SO=protein_coding | is_pseudo=false	4	4	4	4	4	4	4	4	4	4	4	4	48	161204	170484	155701	171120	149713	152736	150569	142860	149646	177812	147223	145450		164627	148969	155033	468630		1.06189	0.960889		0.317649	0.493429
transcript=PF3D7_0310300.1	>PF3D7_0310300.1-p1 | transcript=PF3D7_0310300.1 | gene=PF3D7_0310300 | organism=Plasmodium_falciparum_3D7 | gene_product=phosphoglycerate mutase, putative | transcript_product=phosphoglycerate mutase, putative | location=Pf3D7_03_v3:442720-446457(+) | protein_length=1165 | sequence_SO=chromosome | SO=protein_coding | is_pseudo=false	16	16	16	16	16	16	16	16	16	16	16	16	192	38067.5	39827.1	35503.2	20792.6	33549.9	33920.4	35379	40296.2	31291.3	27716.6	33486.2	33981.5		33547.6	35786.4	31618.9	100953		1.061	1.1318		0.696806	0.0959404
transcript=PF3D7_0309500.1	>PF3D7_0309500.1-p1 | transcript=PF3D7_0309500.1 | gene=PF3D7_0309500 | organism=Plasmodium_falciparum_3D7 | gene_product=asparagine synthetase [glutamine-hydrolyzing], putative | transcript_product=asparagine synthetase [glutamine-hydrolyzing], putative | location=Pf3D7_03_v3:402933-405440(+) | protein_length=610 | sequence_SO=chromosome | SO=protein_coding | is_pseudo=false	24	24	24	24	24	24	24	24	24	24	24	24	288	323998	370335	294560	296771	361350	331474	347392	358603	361061	337835	333426	336517		321416	349705	342210	1.01333e+06		0.939237	1.0219		0.332866	0.450904
transcript=PF3D7_0309600.1	>PF3D7_0309600.1-p1 | transcript=PF3D7_0309600.1 | gene=PF3D7_0309600 | organism=Plasmodium_falciparum_3D7 | gene_product=60S acidic ribosomal protein P2 | transcript_product=60S acidic ribosomal protein P2 | location=Pf3D7_03_v3:407980-408318(+) | protein_length=112 | sequence_SO=chromosome | SO=protein_coding | is_pseudo=false	13	13	13	13	13	13	13	13	13	13	13	13	156	4.58592e+06	4.96518e+06	4.79922e+06	6.10627e+06	4226918	4437117	4.59361e+06	5.74414e+06	4.15137e+06	5.00864e+06	5.3426e+06	4604481		5.11415e+06	4.75045e+06	4.77677e+06	1.46414e+07		1.07063	0.994488		0.460826	0.952882
transcript=PF3D7_0310600.1;transcript=PF3D7_0310600.2	>PF3D7_0310600.1-p1 | transcript=PF3D7_0310600.1 | gene=PF3D7_0310600 | organism=Plasmodium_falciparum_3D7 | gene_product=eukaryotic translation initiation factor 3 subunit K, putative, unspecified product | transcript_product=eukaryotic translation initiation factor 3 subunit K, putative | location=Pf3D7_03_v3:461175-462027(-) | protein_length=235 | sequence_SO=chromosome | SO=protein_coding | i…	11	11	11	11	11	11	11	11	11	11	11	11	132	82839	64238.5	166661	57298.6	66358.1	71704.7	145147	63729.1	64785.7	57379.2	69275.9	72009.9		92759.3	86734.8	65862.7	245357		1.40837	1.3169		0.365464	0.36567
transcript=PF3D7_0310400.1	>PF3D7_0310400.1-p1 | transcript=PF3D7_0310400.1 | gene=PF3D7_0310400 | organism=Plasmodium_falciparum_3D7 | gene_product=parasite-infected erythrocyte surface protein | transcript_product=parasite-infected erythrocyte surface protein | location=Pf3D7_03_v3:447500-451384(+) | protein_length=1294 | sequence_SO=chromosome | SO=protein_coding | is_pseudo=false	49	49	49	49	49	49	49	49	49	49	49	49	588	1.30667e+06	1.35737e+06	1.38177e+06	1.44143e+06	1.37051e+06	1.42792e+06	1.3892e+06	1.30321e+06	1.19591e+06	1.27635e+06	1.25117e+06	1.61731e+06		1.37181e+06	1.37271e+06	1.33519e+06	4.07971e+06		1.02743	1.0281		0.734023	0.726911
transcript=PF3D7_0310500.1	>PF3D7_0310500.1-p1 | transcript=PF3D7_0310500.1 | gene=PF3D7_0310500 | organism=Plasmodium_falciparum_3D7 | gene_product=ATP-dependent RNA helicase DHX57, putative | transcript_product=ATP-dependent RNA helicase DHX57, putative | location=Pf3D7_03_v3:452297-459106(-) | protein_length=2269 | sequence_SO=chromosome | SO=protein_coding | is_pseudo=false	20	20	20	20	20	20	20	20	20	20	20	20	240	64048.9	74529.7	50504.2	35819.6	812120	712910	61578.8	60265.3	43434.6	923500	64670	52761		56225.6	411718	271092	739036		0.207404	1.51874		0.396177	0.653628
transcript=PF3D7_0312400.1	>PF3D7_0312400.1-p1 | transcript=PF3D7_0312400.1 | gene=PF3D7_0312400 | organism=Plasmodium_falciparum_3D7 | gene_product=glycogen synthase kinase 3 | transcript_product=glycogen synthase kinase 3 | location=Pf3D7_03_v3:524154-526439(-) | protein_length=440 | sequence_SO=chromosome | SO=protein_coding | is_pseudo=false	8	8	8	8	8	8	8	8	8	8	8	8	96	94650.1	72656.1	83944	64274.9	83153.5	90409.3	93346.7	94212.6	82054.4	88352.2	102735	96060.8		78881.3	90280.5	92300.6	261462		0.854614	0.978115		0.151551	0.712452
transcript=PF3D7_0310900.1	>PF3D7_0310900.1-p1 | transcript=PF3D7_0310900.1 | gene=PF3D7_0310900 | organism=Plasmodium_falciparum_3D7 | gene_product=conserved Plasmodium protein, unknown function | transcript_product=conserved Plasmodium protein, unknown function | location=Pf3D7_03_v3:466085-468445(+) | protein_length=786 | sequence_SO=chromosome | SO=protein_coding | is_pseudo=false	11	11	11	11	11	11	11	11	11	11	11	11	132	146255	172717	140171	172306	156599	151047	144215	139975	103438	160159	149944	157266		157862	147959	142702	448523		1.10624	1.03684		0.379766	0.724765
transcript=PF3D7_0312300.1	>PF3D7_0312300.1-p1 | transcript=PF3D7_0312300.1 | gene=PF3D7_0312300 | organism=Plasmodium_falciparum_3D7 | gene_product=26S proteasome regulatory subunit RPN12, putative | transcript_product=26S proteasome regulatory subunit RPN12, putative | location=Pf3D7_03_v3:521969-522883(+) | protein_length=304 | sequence_SO=chromosome | SO=protein_coding | is_pseudo=false	6	6	6	6	6	6	6	6	6	6	6	6	72	220968	230313	212235	197364	192954	178947	194931	203891	231226	130370	181766	201370		215220	192681	186183	594084		1.15596	1.0349		0.269527	0.783377
transcript=PF3D7_0314000.1	>PF3D7_0314000.1-p1 | transcript=PF3D7_0314000.1 | gene=PF3D7_0314000 | organism=Plasmodium_falciparum_3D7 | gene_product=HSP20-like chaperone, putative | transcript_product=HSP20-like chaperone, putative | location=Pf3D7_03_v3:567247-568850(+) | protein_length=275 | sequence_SO=chromosome | SO=protein_coding | is_pseudo=false	5	5	5	5	5	5	5	5	5	5	5	5	60	78596.8	56779.8	53474.2	37577.9	54903.2	55953.6	53464.2	58915.4	56940.8	52259.8	52579.7	55147.2		56607.2	55809.1	54231.9	166648		1.0438	1.02908		0.797867	0.362832
transcript=PF3D7_0312800.1	>PF3D7_0312800.1-p1 | transcript=PF3D7_0312800.1 | gene=PF3D7_0312800 | organism=Plasmodium_falciparum_3D7 | gene_product=60S ribosomal protein L26, putative | transcript_product=60S ribosomal protein L26, putative | location=Pf3D7_03_v3:534239-535238(+) | protein_length=126 | sequence_SO=chromosome | SO=protein_coding | is_pseudo=false	5	5	5	5	5	5	5	5	5	5	5	5	60	916430	867879	790849	567010	876658	729324	835429	812084	697600	753185	772362	677278		785542	813374	725106	2.32402e+06		1.08335	1.12173		0.50004	0.0650136
transcript=PF3D7_0314700.1	>PF3D7_0314700.1-p1 | transcript=PF3D7_0314700.1 | gene=PF3D7_0314700 | organism=Plasmodium_falciparum_3D7 | gene_product=RING finger protein RNF1 | transcript_product=RING finger protein RNF1 | location=Pf3D7_03_v3:589002-592547(-) | protein_length=1181 | sequence_SO=chromosome | SO=protein_coding | is_pseudo=false	8	8	8	8	8	8	8	8	8	8	8	8	96	20157.8	20426.2	19932.9	25226.8	22541.4	25240.9	12554	9600.37	27369.7	21668	26252.7	31558.4		21435.9	17484.2	26712.2	65632.3		0.802476	0.654539		0.0785372	0.0894601
transcript=PF3D7_0313000.1	>PF3D7_0313000.1-p1 | transcript=PF3D7_0313000.1 | gene=PF3D7_0313000 | organism=Plasmodium_falciparum_3D7 | gene_product=conserved Plasmodium protein, unknown function | transcript_product=conserved Plasmodium protein, unknown function | location=Pf3D7_03_v3:537621-538804(-) | protein_length=346 | sequence_SO=chromosome | SO=protein_coding | is_pseudo=false	9	9	9	9	9	9	9	9	9	9	9	9	108	132556	148539	120165	169410	149094	127803	127714	146363	48587.8	45566.1	144974	152623		142667	137743	97937.7	378348		1.45672	1.40644		0.23002	0.270213
transcript=PF3D7_0315800.1	>PF3D7_0315800.1-p1 | transcript=PF3D7_0315800.1 | gene=PF3D7_0315800 | organism=Plasmodium_falciparum_3D7 | gene_product=zinc finger protein, putative | transcript_product=zinc finger protein, putative | location=Pf3D7_03_v3:641482-642579(-) | protein_length=365 | sequence_SO=chromosome | SO=protein_coding | is_pseudo=false	7	7	7	7	7	7	7	7	7	7	7	7	84	16594	17522.3	83941.4	99869.7	18373.1	22045.1	11320.3	17230.4	15841.4	20354.6	18350.8	16462.4		54481.8	17242.2	17752.3	89476.3		3.06901	0.971269		0.191328	0.844607
transcript=PF3D7_0314100.1	>PF3D7_0314100.1-p1 | transcript=PF3D7_0314100.1 | gene=PF3D7_0314100 | organism=Plasmodium_falciparum_3D7 | gene_product=vesicle transport v-SNARE protein, putative | transcript_product=vesicle transport v-SNARE protein, putative | location=Pf3D7_03_v3:569308-571051(-) | protein_length=198 | sequence_SO=chromosome | SO=protein_coding | is_pseudo=false	10	10	10	10	10	10	10	10	10	10	10	10	120	119115	161432	112683	74706	133419	120850	114100	58010.5	57228.5	135014	132711	55206.5		116984	106595	95040.2	318619		1.23089	1.12158		0.47358	0.694807
transcript=PF3D7_0316500.1	>PF3D7_0316500.1-p1 | transcript=PF3D7_0316500.1 | gene=PF3D7_0316500 | organism=Plasmodium_falciparum_3D7 | gene_product=kinetochore protein NUF2, putative | transcript_product=kinetochore protein NUF2, putative | location=Pf3D7_03_v3:667006-668391(+) | protein_length=461 | sequence_SO=chromosome | SO=protein_coding | is_pseudo=false	24	24	24	24	24	24	24	24	24	24	24	24	288	60770.9	64978	63272.5	31166.6	36708.6	41680.9	37308.3	39812.4	35838.9	38656.2	66392	39487.6		55047	38877.6	45093.7	139018		1.22073	0.862151		0.389817	0.450533
transcript=PF3D7_0316600.1	>PF3D7_0316600.1-p1 | transcript=PF3D7_0316600.1 | gene=PF3D7_0316600 | organism=Plasmodium_falciparum_3D7 | gene_product=formate-nitrite transporter | transcript_product=formate-nitrite transporter | location=Pf3D7_03_v3:669302-670873(-) | protein_length=309 | sequence_SO=chromosome | SO=protein_coding | is_pseudo=false	8	8	8	8	8	8	8	8	8	8	8	8	96	36838.7	67387.5	23716.4	21729.5	33899.5	32918	33723.6	27844.4	31027.4	32252.7	68444.8	29969.5		37418	32096.4	40423.6	109938		0.925648	0.794		0.838228	0.440932
transcript=PF3D7_0316700.1	>PF3D7_0316700.1-p1 | transcript=PF3D7_0316700.1 | gene=PF3D7_0316700 | organism=Plasmodium_falciparum_3D7 | gene_product=protein YOP1, putative | transcript_product=protein YOP1, putative | location=Pf3D7_03_v3:674458-675636(+) | protein_length=221 | sequence_SO=chromosome | SO=protein_coding | is_pseudo=false	8	8	8	8	8	8	8	8	8	8	8	8	96	30987.9	25174.6	29631.9	29846	27511.7	23309.4	25268	30020.4	31847.2	32206	36443.5	21345.2		28910.1	26527.4	30460.5	85897.9		0.949103	0.870878		0.677549	0.324471
transcript=PF3D7_0315100.1	>PF3D7_0315100.1-p1 | transcript=PF3D7_0315100.1 | gene=PF3D7_0315100 | organism=Plasmodium_falciparum_3D7 | gene_product=eukaryotic translation initiation factor 4E | transcript_product=eukaryotic translation initiation factor 4E | location=Pf3D7_03_v3:612739-613422(-) | protein_length=227 | sequence_SO=chromosome | SO=protein_coding | is_pseudo=false	11	11	11	11	11	11	11	11	11	11	11	11	132	402668	386099	372597	238133	345278	406233	368827	390357	281316	350829	337531	360291		349874	377674	332492	1.06004e+06		1.05228	1.13589		0.696888	0.0905735
transcript=PF3D7_0316300.1;transcript=PF3D7_0316300.2	>PF3D7_0316300.1-p1 | transcript=PF3D7_0316300.1 | gene=PF3D7_0316300 | organism=Plasmodium_falciparum_3D7 | gene_product=inorganic pyrophosphatase, inorganic pyrophosphatase, putative | transcript_product=inorganic pyrophosphatase | location=Pf3D7_03_v3:660020-661643(+) | protein_length=380 | sequence_SO=chromosome | SO=protein_coding | is_pseudo=false;>PF3D7_0316300.2-p1 | transcript=PF3D7_0316…	12	12	12	12	12	12	12	12	12	12	12	12	144	183093	196665	179691	195224	167923	162555	174264	219796	182492	163135	180194	164446		188668	181135	172567	542370		1.09331	1.04965		0.0529503	0.576168
transcript=PF3D7_0317200.1	>PF3D7_0317200.1-p1 | transcript=PF3D7_0317200.1 | gene=PF3D7_0317200 | organism=Plasmodium_falciparum_3D7 | gene_product=cdc2-related protein kinase 4 | transcript_product=cdc2-related protein kinase 4 | location=Pf3D7_03_v3:690154-694815(-) | protein_length=1553 | sequence_SO=chromosome | SO=protein_coding | is_pseudo=false	23	23	23	23	23	23	23	23	23	23	23	23	276	34032	37721.1	37795.1	42023.2	26091.2	23205.4	24561	18100.2	42832.8	33475.9	26836.4	23118.7		37892.9	22989.5	31565.9	92448.3		1.20044	0.728299		0.245635	0.140487
transcript=PF3D7_0316800.1	>PF3D7_0316800.1-p1 | transcript=PF3D7_0316800.1 | gene=PF3D7_0316800 | organism=Plasmodium_falciparum_3D7 | gene_product=40S ribosomal protein S15A, putative | transcript_product=40S ribosomal protein S15A, putative | location=Pf3D7_03_v3:677842-678474(+) | protein_length=130 | sequence_SO=chromosome | SO=protein_coding | is_pseudo=false	10	10	10	10	10	10	10	10	10	10	10	10	120	2.41488e+06	2.03422e+06	2.35742e+06	1.35064e+06	2377017	2.64005e+06	2.74718e+06	2.47148e+06	1693322	2.05652e+06	2.24483e+06	2.33397e+06		2.03929e+06	2.55893e+06	2.08216e+06	6.68038e+06		0.97941	1.22898		0.885563	0.035152
transcript=PF3D7_0317400.1	>PF3D7_0317400.1-p1 | transcript=PF3D7_0317400.1 | gene=PF3D7_0317400 | organism=Plasmodium_falciparum_3D7 | gene_product=DNA replication complex GINS protein, putative | transcript_product=DNA replication complex GINS protein, putative | location=Pf3D7_03_v3:712253-714082(-) | protein_length=518 | sequence_SO=chromosome | SO=protein_coding | is_pseudo=false	4	4	4	4	4	4	4	4	4	4	4	4	48	22414.9	31507.7	26358.4	25019	18401	26679.9	25118.6	23166	25073.7	19839.6	17917.8	23000.6		26325	23341.4	21457.9	71124.3		1.22682	1.08777		0.100052	0.463536
transcript=PF3D7_0317500.1	>PF3D7_0317500.1-p1 | transcript=PF3D7_0317500.1 | gene=PF3D7_0317500 | organism=Plasmodium_falciparum_3D7 | gene_product=kinesin-5 | transcript_product=kinesin-5 | location=Pf3D7_03_v3:716523-721831(-) | protein_length=1619 | sequence_SO=chromosome | SO=protein_coding | is_pseudo=false	17	17	17	17	17	17	17	17	17	17	17	17	204	96851.2	18528	124359	18915.4	21692.9	96914.2	99956.2	66811.9	18701.5	93390.2	85152.9	75314.6		64663.5	71343.8	68139.8	204147		0.948983	1.04702		0.91755	0.901451
transcript=PF3D7_0317000.1	>PF3D7_0317000.1-p1 | transcript=PF3D7_0317000.1 | gene=PF3D7_0317000 | organism=Plasmodium_falciparum_3D7 | gene_product=proteasome subunit alpha type-3, putative | transcript_product=proteasome subunit alpha type-3, putative | location=Pf3D7_03_v3:682795-683685(-) | protein_length=252 | sequence_SO=chromosome | SO=protein_coding | is_pseudo=false	13	13	13	13	13	13	13	13	13	13	13	13	156	1.40154e+06	1.40968e+06	1.38057e+06	1.28045e+06	1.43959e+06	1.44331e+06	1.33521e+06	1.3638e+06	1.37105e+06	1.35566e+06	1.39304e+06	1.47206e+06		1.36806e+06	1.39548e+06	1.39795e+06	4161494		0.978615	0.99823		0.478262	0.949585
transcript=PF3D7_0317300.1	>PF3D7_0317300.1-p1 | transcript=PF3D7_0317300.1 | gene=PF3D7_0317300 | organism=Plasmodium_falciparum_3D7 | gene_product=conserved Plasmodium protein, unknown function | transcript_product=conserved Plasmodium protein, unknown function | location=Pf3D7_03_v3:699544-709728(-) | protein_length=3394 | sequence_SO=chromosome | SO=protein_coding | is_pseudo=false	59	59	59	59	59	59	59	59	59	59	59	59	708	285069	293310	284737	372673	278571	213256	238908	298089	310986	301549	306122	193345		308947	257206	278000	844154		1.11132	0.925201		0.418393	0.567872
transcript=PF3D7_0317600.1	>PF3D7_0317600.1-p1 | transcript=PF3D7_0317600.1 | gene=PF3D7_0317600 | organism=Plasmodium_falciparum_3D7 | gene_product=40S ribosomal protein S11, putative | transcript_product=40S ribosomal protein S11, putative | location=Pf3D7_03_v3:725015-726130(+) | protein_length=161 | sequence_SO=chromosome | SO=protein_coding | is_pseudo=false	9	9	9	9	9	9	9	9	9	9	9	9	108	6.26748e+06	6.70231e+06	5.80044e+06	6.51274e+06	6.51628e+06	5.64524e+06	5627501	6140873	6.80511e+06	6246366	5900112	5.64462e+06		6.32074e+06	5.98247e+06	6.14905e+06	1.84523e+07		1.02792	0.97291		0.609681	0.632056
transcript=PF3D7_0318300.1	>PF3D7_0318300.1-p1 | transcript=PF3D7_0318300.1 | gene=PF3D7_0318300 | organism=Plasmodium_falciparum_3D7 | gene_product=conserved Plasmodium protein, unknown function | transcript_product=conserved Plasmodium protein, unknown function | location=Pf3D7_03_v3:756491-760292(-) | protein_length=1119 | sequence_SO=chromosome | SO=protein_coding | is_pseudo=false	10	10	10	10	10	10	10	10	10	10	10	10	120	35761.3	120543	94844.7	36012.3	44536.8	28387.7	24247.3	105488	16568.7	49455.7	30253.3	15939.1		71790.4	50665	28054.2	150510		2.55899	1.80597		0.13111	0.328942
transcript=PF3D7_0317800.1	>PF3D7_0317800.1-p1 | transcript=PF3D7_0317800.1 | gene=PF3D7_0317800 | organism=Plasmodium_falciparum_3D7 | gene_product=26S proteasome non-ATPase regulatory subunit 9, putative | transcript_product=26S proteasome non-ATPase regulatory subunit 9, putative | location=Pf3D7_03_v3:738205-738882(-) | protein_length=225 | sequence_SO=chromosome | SO=protein_coding | is_pseudo=false	12	12	12	12	12	12	12	12	12	12	12	12	144	280007	367790	374357	430358	385566	375975	356217	368560	348252	374022	394148	478367		363128	371580	398697	1.1334e+06		0.910787	0.931985		0.429117	0.410879
transcript=PF3D7_0319500.1	>PF3D7_0319500.1-p1 | transcript=PF3D7_0319500.1 | gene=PF3D7_0319500 | organism=Plasmodium_falciparum_3D7 | gene_product=RNA-binding protein, putative | transcript_product=RNA-binding protein, putative | location=Pf3D7_03_v3:815569-816855(+) | protein_length=309 | sequence_SO=chromosome | SO=protein_coding | is_pseudo=false	5	5	5	5	5	5	5	5	5	5	5	5	60	18411	62117.2	62840.4	80138.2	15337.4	66681.8	58181.3	73120.4	72203.1	23503.3	22331.2	21318.3		55876.7	53330.2	34838.9	144046		1.60386	1.53076		0.290054	0.344706
transcript=PF3D7_0319600.1	>PF3D7_0319600.1-p1 | transcript=PF3D7_0319600.1 | gene=PF3D7_0319600 | organism=Plasmodium_falciparum_3D7 | gene_product=elongation factor 1-delta, putative | transcript_product=elongation factor 1-delta, putative | location=Pf3D7_03_v3:817913-818695(+) | protein_length=156 | sequence_SO=chromosome | SO=protein_coding | is_pseudo=false	6	6	6	6	6	6	6	6	6	6	6	6	72	97042	57595.8	129513	106869	106376	63943.1	93880.1	78326	64706.2	88373.3	50173.6	72707.4		97754.9	85631.4	68990.1	252376		1.41694	1.24121		0.156911	0.222271
transcript=PF3D7_0318200.1	>PF3D7_0318200.1-p1 | transcript=PF3D7_0318200.1 | gene=PF3D7_0318200 | organism=Plasmodium_falciparum_3D7 | gene_product=DNA-directed RNA polymerase II subunit RPB1 | transcript_product=DNA-directed RNA polymerase II subunit RPB1 | location=Pf3D7_03_v3:748465-755838(+) | protein_length=2457 | sequence_SO=chromosome | SO=protein_coding | is_pseudo=false	59	59	59	59	59	59	59	59	59	59	59	59	708	377770	405198	348290	454531	399136	342145	348495	383811	394584	413710	402416	355977		396447	368397	391672	1.15652e+06		1.01219	0.940575		0.861014	0.257761
transcript=PF3D7_0320100.1	>PF3D7_0320100.1-p1 | transcript=PF3D7_0320100.1 | gene=PF3D7_0320100 | organism=Plasmodium_falciparum_3D7 | gene_product=protein transport protein SEC22 | transcript_product=protein transport protein SEC22 | location=Pf3D7_03_v3:840362-841758(+) | protein_length=221 | sequence_SO=chromosome | SO=protein_coding | is_pseudo=false	13	13	13	13	13	13	13	13	13	13	13	13	156	61874.9	58133.3	64043.8	23155	64827.1	66515.4	68485.8	64990.7	67786.8	31753	51334.2	69659.9		51801.7	66204.7	55133.5	173140		0.93957	1.20081		0.807107	0.298366
transcript=PF3D7_0319100.1	>PF3D7_0319100.1-p1 | transcript=PF3D7_0319100.1 | gene=PF3D7_0319100 | organism=Plasmodium_falciparum_3D7 | gene_product=E3 ubiquitin-protein ligase RBX1, putative | transcript_product=E3 ubiquitin-protein ligase RBX1, putative | location=Pf3D7_03_v3:802260-802583(-) | protein_length=107 | sequence_SO=chromosome | SO=protein_coding | is_pseudo=false	3	3	3	3	3	3	3	3	3	3	3	3	36	115689	132887	123888	139862	127839	118320	123237	146257	136784	132108	123853	131758		128081	128913	131126	388120		0.976784	0.983128		0.631051	0.756053
transcript=PF3D7_0320000.1	>PF3D7_0320000.1-p1 | transcript=PF3D7_0320000.1 | gene=PF3D7_0320000 | organism=Plasmodium_falciparum_3D7 | gene_product=protein phosphatase inhibitor 2 | transcript_product=protein phosphatase inhibitor 2 | location=Pf3D7_03_v3:837307-838271(+) | protein_length=144 | sequence_SO=chromosome | SO=protein_coding | is_pseudo=false	2	2	2	2	2	2	2	2	2	2	2	2	24	110379	109562	102159	121894	112066	105228	107808	95482.6	104018	110783	126872	123312		110998	105146	116246	332391		0.954854	0.904511		0.466338	0.140916
transcript=PF3D7_0320300.1	>PF3D7_0320300.1-p1 | transcript=PF3D7_0320300.1 | gene=PF3D7_0320300 | organism=Plasmodium_falciparum_3D7 | gene_product=T-complex protein 1 subunit epsilon | transcript_product=T-complex protein 1 subunit epsilon | location=Pf3D7_03_v3:845713-847320(+) | protein_length=535 | sequence_SO=chromosome | SO=protein_coding | is_pseudo=false	31	31	31	31	31	31	31	31	31	31	31	31	372	771243	777547	664039	666729	729256	691070	726827	687835	660523	676509	704905	799867		719889	708747	710451	2.13909e+06		1.01329	0.997602		0.838432	0.961599
transcript=PF3D7_0320500.1	>PF3D7_0320500.1-p1 | transcript=PF3D7_0320500.1 | gene=PF3D7_0320500 | organism=Plasmodium_falciparum_3D7 | gene_product=nicotinamidase, putative | transcript_product=nicotinamidase, putative | location=Pf3D7_03_v3:860813-862102(+) | protein_length=429 | sequence_SO=chromosome | SO=protein_coding | is_pseudo=false	9	9	9	9	9	9	9	9	9	9	9	9	108	163468	193132	171687	211468	193953	169011	167487	166232	172803	179217	180717	195156		184939	174171	181973	541083		1.0163	0.957124		0.813861	0.377898
transcript=PF3D7_0321900.1	>PF3D7_0321900.1-p1 | transcript=PF3D7_0321900.1 | gene=PF3D7_0321900 | organism=Plasmodium_falciparum_3D7 | gene_product=cyclic amine resistance locus protein | transcript_product=cyclic amine resistance locus protein | location=Pf3D7_03_v3:922974-927942(+) | protein_length=1283 | sequence_SO=chromosome | SO=protein_coding | is_pseudo=false	3	3	3	3	3	3	3	3	3	3	3	3	36	12563.4	7644.97	13118.5	9668.31	16643.9	8045.85	8406.45	21683.7	27060.9	18401.2	8656.34	8531.88		10748.8	13695	15662.6	40106.4		0.686271	0.874375		0.356177	0.73606
transcript=PF3D7_0320800.1	>PF3D7_0320800.1-p1 | transcript=PF3D7_0320800.1 | gene=PF3D7_0320800 | organism=Plasmodium_falciparum_3D7 | gene_product=ATP-dependent RNA helicase DDX6 | transcript_product=ATP-dependent RNA helicase DDX6 | location=Pf3D7_03_v3:870817-872342(+) | protein_length=433 | sequence_SO=chromosome | SO=protein_coding | is_pseudo=false	20	20	20	20	20	20	20	20	20	20	20	20	240	460329	600832	510707	616086	548137	496601	538220	540980	663798	541606	528633	524185		546988	530984	564556	1.64253e+06		0.968883	0.940535		0.736618	0.398735
transcript=PF3D7_0322100.1	>PF3D7_0322100.1-p1 | transcript=PF3D7_0322100.1 | gene=PF3D7_0322100 | organism=Plasmodium_falciparum_3D7 | gene_product=mRNA-capping enzyme subunit beta | transcript_product=mRNA-capping enzyme subunit beta | location=Pf3D7_03_v3:930640-932415(-) | protein_length=591 | sequence_SO=chromosome | SO=protein_coding | is_pseudo=false	8	8	8	8	8	8	8	8	8	8	8	8	96	16427.9	13905	17107.7	12091	21480.7	12348.1	15403	32934	22377.3	23331.1	18884	22682.4		14882.9	20541.5	21818.7	57243		0.682118	0.941462		0.00416326	0.800112
transcript=PF3D7_0320900.1	>PF3D7_0320900.1-p1 | transcript=PF3D7_0320900.1 | gene=PF3D7_0320900 | organism=Plasmodium_falciparum_3D7 | gene_product=histone H2A.Z | transcript_product=histone H2A.Z | location=Pf3D7_03_v3:875213-876295(+) | protein_length=158 | sequence_SO=chromosome | SO=protein_coding | is_pseudo=false	10	10	10	10	10	10	10	10	10	10	10	10	120	4.81954e+06	4.85697e+06	4.03223e+06	3.17902e+06	5.10419e+06	4.5732e+06	5058621	5253440	4392457	4688102	4585102	5314210		4.22194e+06	4.99736e+06	4.74497e+06	1.39643e+07		0.889773	1.05319		0.297809	0.3512
transcript=PF3D7_0322000.1	>PF3D7_0322000.1-p1 | transcript=PF3D7_0322000.1 | gene=PF3D7_0322000 | organism=Plasmodium_falciparum_3D7 | gene_product=peptidyl-prolyl cis-trans isomerase | transcript_product=peptidyl-prolyl cis-trans isomerase | location=Pf3D7_03_v3:928644-929159(-) | protein_length=171 | sequence_SO=chromosome | SO=protein_coding | is_pseudo=false	12	12	12	12	12	12	12	12	12	12	12	12	144	1546949	1.80539e+06	2.07665e+06	1.58579e+06	1.80225e+06	2.30136e+06	2342475	1861451	1.72956e+06	1.99196e+06	2.10017e+06	2344756		1.7537e+06	2.07688e+06	2.04161e+06	5.87219e+06		0.858976	1.01728		0.153717	0.85967
transcript=PF3D7_0323500.1	>PF3D7_0323500.1-p1 | transcript=PF3D7_0323500.1 | gene=PF3D7_0323500 | organism=Plasmodium_falciparum_3D7 | gene_product=survival motor neuron-like protein | transcript_product=survival motor neuron-like protein | location=Pf3D7_03_v3:986265-987610(+) | protein_length=315 | sequence_SO=chromosome | SO=protein_coding | is_pseudo=false	6	6	6	6	6	6	6	6	6	6	6	6	72	19039.6	20109.7	22032.7	19683.1	19131.6	19590.4	20220.8	14685	22793.4	17304.6	18629.2	21330		20216.3	18407	20014.3	58637.5		1.01009	0.919691		0.891942	0.399949
transcript=PF3D7_0322900.1	>PF3D7_0322900.1-p1 | transcript=PF3D7_0322900.1 | gene=PF3D7_0322900 | organism=Plasmodium_falciparum_3D7 | gene_product=40S ribosomal protein S3A, putative | transcript_product=40S ribosomal protein S3A, putative | location=Pf3D7_03_v3:965553-966502(-) | protein_length=262 | sequence_SO=chromosome | SO=protein_coding | is_pseudo=false	35	35	35	35	35	35	35	35	35	35	35	35	420	1.83776e+06	1.83098e+06	1664143	1.13888e+06	1.66917e+06	1803808	1.7216e+06	1828400	1.45724e+06	1.60174e+06	1.52687e+06	1.49667e+06		1.61794e+06	1.75574e+06	1.52063e+06	4.89432e+06		1.06399	1.15462		0.599548	0.00292981
transcript=PF3D7_0323800.1	>PF3D7_0323800.1-p1 | transcript=PF3D7_0323800.1 | gene=PF3D7_0323800 | organism=Plasmodium_falciparum_3D7 | gene_product=conserved Plasmodium protein, unknown function | transcript_product=conserved Plasmodium protein, unknown function | location=Pf3D7_03_v3:998649-1001582(+) | protein_length=977 | sequence_SO=chromosome | SO=protein_coding | is_pseudo=false	10	10	10	10	10	10	10	10	10	10	10	10	120	46551.6	45947.2	29853.3	24845.9	22794.7	21695.8	31453.6	24999.9	31331.7	25768.4	37611.4	41130.7		36799.5	25236	33960.5	95996.1		1.0836	0.743099		0.681088	0.0820766
transcript=PF3D7_0323000.1	>PF3D7_0323000.1-p1 | transcript=PF3D7_0323000.1 | gene=PF3D7_0323000 | organism=Plasmodium_falciparum_3D7 | gene_product=translation machinery-associated protein 7, putative | transcript_product=translation machinery-associated protein 7, putative | location=Pf3D7_03_v3:968675-969202(-) | protein_length=54 | sequence_SO=chromosome | SO=protein_coding | is_pseudo=false	4	4	4	4	4	4	4	4	4	4	4	4	48	335557	317740	350686	488570	334886	358674	373017	349227	388456	377236	368482	385660		373138	353951	379958	1.10705e+06		0.982051	0.931552		0.873079	0.0392361
transcript=PF3D7_0323700.1	>PF3D7_0323700.1-p1 | transcript=PF3D7_0323700.1 | gene=PF3D7_0323700 | organism=Plasmodium_falciparum_3D7 | gene_product=U4/U6.U5 tri-snRNP-associated protein 1, putative | transcript_product=U4/U6.U5 tri-snRNP-associated protein 1, putative | location=Pf3D7_03_v3:991544-993625(-) | protein_length=693 | sequence_SO=chromosome | SO=protein_coding | is_pseudo=false	8	8	8	8	8	8	8	8	8	8	8	8	96	249804	262008	184168	308337	282881	246971	261030	322692	359428	302380	249649	273032		251079	278394	296122	825595		0.847891	0.940131		0.244608	0.564486
transcript=PF3D7_0401800.1	>PF3D7_0401800.1-p1 | transcript=PF3D7_0401800.1 | gene=PF3D7_0401800 | organism=Plasmodium_falciparum_3D7 | gene_product=Plasmodium exported protein (PHISTb), unknown function | transcript_product=Plasmodium exported protein (PHISTb), unknown function | location=Pf3D7_04_v3:103742-105603(-) | protein_length=560 | sequence_SO=chromosome | SO=protein_coding | is_pseudo=false	20	20	20	20	20	20	20	20	20	20	20	20	240	326288	371718	280137	311856	325542	301596	309801	323528	320254	344275	335686	311763		322500	315117	327994	965611		0.983247	0.960739		0.80136	0.218359
transcript=PF3D7_0402000.1	>PF3D7_0402000.1-p1 | transcript=PF3D7_0402000.1 | gene=PF3D7_0402000 | organism=Plasmodium_falciparum_3D7 | gene_product=Plasmodium exported protein (PHISTa), unknown function | transcript_product=Plasmodium exported protein (PHISTa), unknown function | location=Pf3D7_04_v3:114601-116058(-) | protein_length=428 | sequence_SO=chromosome | SO=protein_coding | is_pseudo=false	9	9	9	9	9	9	9	9	9	9	9	9	108	148793	127225	156086	99664.3	158271	172429	192336	195164	141569	147833	190453	170521		132942	179550	162594	475086		0.817632	1.10428		0.130576	0.279168
transcript=PF3D7_0403600.1	>PF3D7_0403600.1-p1 | transcript=PF3D7_0403600.1 | gene=PF3D7_0403600 | organism=Plasmodium_falciparum_3D7 | gene_product=conserved Plasmodium protein, unknown function | transcript_product=conserved Plasmodium protein, unknown function | location=Pf3D7_04_v3:197846-201208(-) | protein_length=768 | sequence_SO=chromosome | SO=protein_coding | is_pseudo=false	5	5	5	5	5	5	5	5	5	5	5	5	60	45284.5	41095.9	41046.6	40538.7	36797.7	36691.7	46399.8	31157	39405.5	35326.6	35632.9	30489.3		41991.4	37761.6	35213.6	114967		1.19248	1.07236		0.0251667	0.518144
transcript=PF3D7_0402100.1	>PF3D7_0402100.1-p1 | transcript=PF3D7_0402100.1 | gene=PF3D7_0402100 | organism=Plasmodium_falciparum_3D7 | gene_product=Plasmodium exported protein (PHISTb), unknown function | transcript_product=Plasmodium exported protein (PHISTb), unknown function | location=Pf3D7_04_v3:123588-125464(-) | protein_length=575 | sequence_SO=chromosome | SO=protein_coding | is_pseudo=false	17	17	17	17	17	17	17	17	17	17	17	17	204	539241	624314	631390	770729	583409	496651	552738	676009	694757	619403	579391	502614		641418	577202	599041	1.81766e+06		1.07074	0.963542		0.523532	0.704522
transcript=PF3D7_0402400.1	>PF3D7_0402400.1-p1 | transcript=PF3D7_0402400.1 | gene=PF3D7_0402400 | organism=Plasmodium_falciparum_3D7 | gene_product=Plasmodium exported protein, unknown function | transcript_product=Plasmodium exported protein, unknown function | location=Pf3D7_04_v3:147490-148380(-) | protein_length=254 | sequence_SO=chromosome | SO=protein_coding | is_pseudo=false	4	4	4	4	4	4	4	4	4	4	4	4	48	424661	362601	317387	388703	376909	347154	331063	403679	440353	419416	390112	343820		373338	364701	398425	1.13646e+06		0.937035	0.915357		0.446291	0.251436
transcript=PF3D7_0404700.1	>PF3D7_0404700.1-p1 | transcript=PF3D7_0404700.1 | gene=PF3D7_0404700 | organism=Plasmodium_falciparum_3D7 | gene_product=dipeptidyl aminopeptidase 3 | transcript_product=dipeptidyl aminopeptidase 3 | location=Pf3D7_04_v3:260454-263418(-) | protein_length=939 | sequence_SO=chromosome | SO=protein_coding | is_pseudo=false	14	14	14	14	14	14	14	14	14	14	14	14	168	75519.7	72544.4	79640.1	52971.1	19114.4	69386.5	45943.5	18074.7	16810.3	37939.1	57824.8	65414.3		70168.8	38129.8	44497.1	152796		1.57693	0.856904		0.0976865	0.711366
transcript=PF3D7_0403700.1	>PF3D7_0403700.1-p1 | transcript=PF3D7_0403700.1 | gene=PF3D7_0403700 | organism=Plasmodium_falciparum_3D7 | gene_product=pre-mRNA-splicing factor CLF1, putative | transcript_product=pre-mRNA-splicing factor CLF1, putative | location=Pf3D7_04_v3:206228-209394(-) | protein_length=780 | sequence_SO=chromosome | SO=protein_coding | is_pseudo=false	11	11	11	11	11	11	11	11	11	11	11	11	132	18243.8	20343.3	20525.6	13307.5	418145	17197.2	437114	446765	343602	20720.9	360721	18921		18105	329805	185991	533901		0.0973436	1.77323		0.17864	0.349915
transcript=PF3D7_0405100.1	>PF3D7_0405100.1-p1 | transcript=PF3D7_0405100.1 | gene=PF3D7_0405100 | organism=Plasmodium_falciparum_3D7 | gene_product=protein transport protein Sec24B, putative | transcript_product=protein transport protein Sec24B, putative | location=Pf3D7_04_v3:272255-276824(-) | protein_length=1350 | sequence_SO=chromosome | SO=protein_coding | is_pseudo=false	10	10	10	10	10	10	10	10	10	10	10	10	120	24747.5	28793.7	23779.3	24809.7	25718	25970.9	22587.4	26211.7	28687.1	25101.7	24123.1	26494.7		25532.5	25122	26101.7	76756.2		0.978196	0.962468		0.715622	0.481895
transcript=PF3D7_0405400.1	>PF3D7_0405400.1-p1 | transcript=PF3D7_0405400.1 | gene=PF3D7_0405400 | organism=Plasmodium_falciparum_3D7 | gene_product=pre-mRNA-processing-splicing factor 8, putative | transcript_product=pre-mRNA-processing-splicing factor 8, putative | location=Pf3D7_04_v3:291251-300976(+) | protein_length=3136 | sequence_SO=chromosome | SO=protein_coding | is_pseudo=false	44	44	44	44	44	44	44	44	44	44	44	44	528	63198	59441.2	56167.2	14377.5	58469.4	57654.3	64173.8	59609.5	51963.5	51971.6	57615.5	55113.6		48296	59976.8	54166.1	162439		0.891628	1.10728		0.643429	0.0271344
transcript=PF3D7_0404300.1	>PF3D7_0404300.1-p1 | transcript=PF3D7_0404300.1 | gene=PF3D7_0404300 | organism=Plasmodium_falciparum_3D7 | gene_product=conserved Plasmodium protein, unknown function | transcript_product=conserved Plasmodium protein, unknown function | location=Pf3D7_04_v3:234014-237013(-) | protein_length=631 | sequence_SO=chromosome | SO=protein_coding | is_pseudo=false	7	7	7	7	7	7	7	7	7	7	7	7	84	147079	165159	147650	170641	174575	163523	159901	175738	179763	165809	167610	184676		157632	168435	174464	500531		0.903521	0.965438		0.0715091	0.359762
transcript=PF3D7_0404900.1	>PF3D7_0404900.1-p1 | transcript=PF3D7_0404900.1 | gene=PF3D7_0404900 | organism=Plasmodium_falciparum_3D7 | gene_product=6-cysteine protein P41 | transcript_product=6-cysteine protein P41 | location=Pf3D7_04_v3:267244-268380(-) | protein_length=378 | sequence_SO=chromosome | SO=protein_coding | is_pseudo=false	15	15	15	15	15	15	15	15	15	15	15	15	180	243355	256438	224717	236193	243385	236585	234821	210262	235202	235550	242508	237606		240176	231263	237716	709155		1.01035	0.972853		0.740905	0.443448
transcript=PF3D7_0405600.1	>PF3D7_0405600.1-p1 | transcript=PF3D7_0405600.1 | gene=PF3D7_0405600 | organism=Plasmodium_falciparum_3D7 | gene_product=TMEM33 domain-containing protein, putative | transcript_product=TMEM33 domain-containing protein, putative | location=Pf3D7_04_v3:303329-305343(+) | protein_length=315 | sequence_SO=chromosome | SO=protein_coding | is_pseudo=false	8	8	8	8	8	8	8	8	8	8	8	8	96	387868	439552	472960	542200	407770	342599	375653	459200	515019	447590	425154	397606		460645	396306	446343	1.30329e+06		1.03204	0.887896		0.739315	0.205957
transcript=PF3D7_0406200.1	>PF3D7_0406200.1-p1 | transcript=PF3D7_0406200.1 | gene=PF3D7_0406200 | organism=Plasmodium_falciparum_3D7 | gene_product=sexual stage-specific protein precursor | transcript_product=sexual stage-specific protein precursor | location=Pf3D7_04_v3:329216-329689(+) | protein_length=157 | sequence_SO=chromosome | SO=protein_coding | is_pseudo=false	8	8	8	8	8	8	8	8	8	8	8	8	96	11746.4	97239.8	128428	113696	17769.8	109667	122508	76544.6	14299	154562	17303.1	105636		87777.5	81622.3	72950	242350		1.20326	1.11888		0.744314	0.842893
transcript=PF3D7_0405900.1	>PF3D7_0405900.1-p1 | transcript=PF3D7_0405900.1 | gene=PF3D7_0405900 | organism=Plasmodium_falciparum_3D7 | gene_product=apical sushi protein | transcript_product=apical sushi protein | location=Pf3D7_04_v3:316540-319178(-) | protein_length=731 | sequence_SO=chromosome | SO=protein_coding | is_pseudo=false	28	28	28	28	28	28	28	28	28	28	28	28	336	248460	72976.4	273346	312344	74816.6	254192	241875	200501	78110	71246.9	250181	258192		226782	192846	164433	584060		1.37918	1.1728		0.432391	0.6831
transcript=PF3D7_0406100.1	>PF3D7_0406100.1-p1 | transcript=PF3D7_0406100.1 | gene=PF3D7_0406100 | organism=Plasmodium_falciparum_3D7 | gene_product=V-type proton ATPase subunit B | transcript_product=V-type proton ATPase subunit B | location=Pf3D7_04_v3:323267-325225(-) | protein_length=494 | sequence_SO=chromosome | SO=protein_coding | is_pseudo=false	28	28	28	28	28	28	28	28	28	28	28	28	336	654693	688849	630513	623394	670506	623501	647640	663727	694195	619643	649543	595952		649362	651343	639833	1.94054e+06		1.01489	1.01799		0.72622	0.649386
transcript=PF3D7_0406400.1	>PF3D7_0406400.1-p1 | transcript=PF3D7_0406400.1 | gene=PF3D7_0406400 | organism=Plasmodium_falciparum_3D7 | gene_product=cytosolic glyoxalase II | transcript_product=cytosolic glyoxalase II | location=Pf3D7_04_v3:332043-333856(+) | protein_length=263 | sequence_SO=chromosome | SO=protein_coding | is_pseudo=false	12	12	12	12	12	12	12	12	12	12	12	12	144	184266	201959	157211	238655	192277	192255	179652	191932	194049	209056	185364	169495		195523	189029	189491	574042		1.03183	0.997561		0.765217	0.960904
transcript=PF3D7_0409400.1	>PF3D7_0409400.1-p1 | transcript=PF3D7_0409400.1 | gene=PF3D7_0409400 | organism=Plasmodium_falciparum_3D7 | gene_product=chaperone protein DnaJ | transcript_product=chaperone protein DnaJ | location=Pf3D7_04_v3:446000-448018(+) | protein_length=672 | sequence_SO=chromosome | SO=protein_coding | is_pseudo=false	13	13	13	13	13	13	13	13	13	13	13	13	156	14722	14745.9	14199.3	14760.7	15212.3	12261.7	14027.3	12855.3	15470.3	15787.1	17179.4	11034		14607	13589.2	14867.7	43063.8		0.982465	0.914007		0.857688	0.43327
transcript=PF3D7_0407800.1	>PF3D7_0407800.1-p1 | transcript=PF3D7_0407800.1 | gene=PF3D7_0407800 | organism=Plasmodium_falciparum_3D7 | gene_product=conserved Plasmodium protein, unknown function | transcript_product=conserved Plasmodium protein, unknown function | location=Pf3D7_04_v3:384924-390806(+) | protein_length=1960 | sequence_SO=chromosome | SO=protein_coding | is_pseudo=false	33	33	33	33	33	33	33	33	33	33	33	33	396	421248	492064	363633	507243	430105	340278	369482	434744	485485	455886	454774	375696		446047	393652	442960	1.28266e+06		1.00697	0.888685		0.942322	0.186073
transcript=PF3D7_0409100.1	>PF3D7_0409100.1-p1 | transcript=PF3D7_0409100.1 | gene=PF3D7_0409100 | organism=Plasmodium_falciparum_3D7 | gene_product=U4/U6 small nuclear ribonucleoprotein PRP31, putative | transcript_product=U4/U6 small nuclear ribonucleoprotein PRP31, putative | location=Pf3D7_04_v3:436217-437981(-) | protein_length=534 | sequence_SO=chromosome | SO=protein_coding | is_pseudo=false	4	4	4	4	4	4	4	4	4	4	4	4	48	266061	363122	296237	358404	291871	266393	302141	460740	351901	282791	473304	348350		320956	330286	364086	1.01533e+06		0.881537	0.907165		0.395192	0.590046
transcript=PF3D7_0409600.1	>PF3D7_0409600.1-p1 | transcript=PF3D7_0409600.1 | gene=PF3D7_0409600 | organism=Plasmodium_falciparum_3D7 | gene_product=replication protein A1, large subunit | transcript_product=replication protein A1, large subunit | location=Pf3D7_04_v3:452134-455571(-) | protein_length=1145 | sequence_SO=chromosome | SO=protein_coding | is_pseudo=false	22	22	22	22	22	22	22	22	22	22	22	22	264	101304	111630	102799	98818.8	129519	101180	122574	87181.2	100561	105917	129511	110617		103638	110113	111651	325403		0.92823	0.986227		0.307365	0.899531
transcript=PF3D7_0411100.1	>PF3D7_0411100.1-p1 | transcript=PF3D7_0411100.1 | gene=PF3D7_0411100 | organism=Plasmodium_falciparum_3D7 | gene_product=mediator of RNA polymerase II transcription subunit 8, putative | transcript_product=mediator of RNA polymerase II transcription subunit 8, putative | location=Pf3D7_04_v3:504478-505095(-) | protein_length=205 | sequence_SO=chromosome | SO=protein_coding | is_pseudo=false	4	4	4	4	4	4	4	4	4	4	4	4	48	40821.3	36541.2	31587.3	23882.8	36628.8	36604.5	37127.2	41987.8	45814	47172.4	36102	31921.6		33208.1	38087.1	40252.5	111548		0.824996	0.946204		0.224088	0.613476
transcript=PF3D7_0411900.1	>PF3D7_0411900.1-p1 | transcript=PF3D7_0411900.1 | gene=PF3D7_0411900 | organism=Plasmodium_falciparum_3D7 | gene_product=DNA polymerase alpha catalytic subunit A | transcript_product=DNA polymerase alpha catalytic subunit A | location=Pf3D7_04_v3:528192-534485(-) | protein_length=1912 | sequence_SO=chromosome | SO=protein_coding | is_pseudo=false	26	26	26	26	26	26	26	26	26	26	26	26	312	95441.5	92824.1	101678	103986	106507	98525.8	96188.8	111635	106602	86692.8	107618	91004.5		98482.4	103214	97979.2	299676		1.00514	1.05343		0.936377	0.45112
transcript=PF3D7_0410600.1	>PF3D7_0410600.1-p1 | transcript=PF3D7_0410600.1 | gene=PF3D7_0410600 | organism=Plasmodium_falciparum_3D7 | gene_product=conserved protein, unknown function | transcript_product=conserved protein, unknown function | location=Pf3D7_04_v3:479028-480468(+) | protein_length=326 | sequence_SO=chromosome | SO=protein_coding | is_pseudo=false	14	14	14	14	14	14	14	14	14	14	14	14	168	129563	120206	134081	108889	109248	123660	100002	101172	117397	114912	111456	109053		123185	108520	113204	344910		1.08816	0.958622		0.171126	0.464893
transcript=PF3D7_0410800.1	>PF3D7_0410800.1-p1 | transcript=PF3D7_0410800.1 | gene=PF3D7_0410800 | organism=Plasmodium_falciparum_3D7 | gene_product=conserved Plasmodium protein, unknown function | transcript_product=conserved Plasmodium protein, unknown function | location=Pf3D7_04_v3:485832-489728(+) | protein_length=1298 | sequence_SO=chromosome | SO=protein_coding | is_pseudo=false	46	46	46	46	46	46	46	46	46	46	46	46	552	244278	266790	237874	303265	255493	222143	254672	284459	262444	282836	328742	260045		263051	254192	283517	800760		0.927817	0.896568		0.382531	0.202607
transcript=PF3D7_0413700.1	>PF3D7_0413700.1-p1 | transcript=PF3D7_0413700.1 | gene=PF3D7_0413700 | organism=Plasmodium_falciparum_3D7 | gene_product=lysine decarboxylase-like protein, putative | transcript_product=lysine decarboxylase-like protein, putative | location=Pf3D7_04_v3:619786-620802(-) | protein_length=338 | sequence_SO=chromosome | SO=protein_coding | is_pseudo=false	10	10	10	10	10	10	10	10	10	10	10	10	120	101349	107190	95756	45260.4	64189.8	86798.5	94593	110868	113555	98810.1	61636	106707		87388.8	89112.3	95177	271678		0.918172	0.936281		0.686647	0.702415
transcript=PF3D7_0413900.1	>PF3D7_0413900.1-p1 | transcript=PF3D7_0413900.1 | gene=PF3D7_0413900 | organism=Plasmodium_falciparum_3D7 | gene_product=ubiquitin carboxyl-terminal hydrolase 13, putative | transcript_product=ubiquitin carboxyl-terminal hydrolase 13, putative | location=Pf3D7_04_v3:623168-626226(-) | protein_length=853 | sequence_SO=chromosome | SO=protein_coding | is_pseudo=false	21	21	21	21	21	21	21	21	21	21	21	21	252	103309	80425.4	90634.5	83156.9	92175.8	67751.8	92929.7	106515	72290.9	47854.4	102009	99263.9		89381.4	89843.2	80354.5	259579		1.11234	1.11808		0.547282	0.556442
transcript=PF3D7_0412000.1	>PF3D7_0412000.1-p1 | transcript=PF3D7_0412000.1 | gene=PF3D7_0412000 | organism=Plasmodium_falciparum_3D7 | gene_product=LITAF-like zinc finger protein, putative | transcript_product=LITAF-like zinc finger protein, putative | location=Pf3D7_04_v3:536774-539110(+) | protein_length=778 | sequence_SO=chromosome | SO=protein_coding | is_pseudo=false	11	11	11	11	11	11	11	11	11	11	11	11	132	164522	173944	160266	190405	177094	161397	157563	150816	169552	177945	177175	180993		172284	161718	176416	510418		0.976577	0.916682		0.594032	0.0713615
transcript=PF3D7_0414900.1	>PF3D7_0414900.1-p1 | transcript=PF3D7_0414900.1 | gene=PF3D7_0414900 | organism=Plasmodium_falciparum_3D7 | gene_product=armadillo-domain containing rhoptry protein | transcript_product=armadillo-domain containing rhoptry protein | location=Pf3D7_04_v3:665973-668147(+) | protein_length=275 | sequence_SO=chromosome | SO=protein_coding | is_pseudo=false	7	7	7	7	7	7	7	7	7	7	7	7	84	59013	71482.4	81744	72573	76714.3	89744.3	91681.9	89944.3	83838.4	70380.6	85443.1	93471.5		71203.1	87021.2	83283.4	241508		0.85495	1.04488		0.120976	0.552628
transcript=PF3D7_0413600.1	>PF3D7_0413600.1-p1 | transcript=PF3D7_0413600.1 | gene=PF3D7_0413600 | organism=Plasmodium_falciparum_3D7 | gene_product=26S protease regulatory subunit 6B, putative | transcript_product=26S protease regulatory subunit 6B, putative | location=Pf3D7_04_v3:616914-618350(-) | protein_length=392 | sequence_SO=chromosome | SO=protein_coding | is_pseudo=false	26	26	26	26	26	26	26	26	26	26	26	26	312	593469	587691	489034	460730	568221	520394	523341	547202	549290	544527	536135	537254		532731	539790	541801	1.61432e+06		0.983259	0.996287		0.806979	0.872429
transcript=PF3D7_0415300.1	>PF3D7_0415300.1-p1 | transcript=PF3D7_0415300.1 | gene=PF3D7_0415300 | organism=Plasmodium_falciparum_3D7 | gene_product=cdc2-related protein kinase 3 | transcript_product=cdc2-related protein kinase 3 | location=Pf3D7_04_v3:681810-685968(+) | protein_length=1339 | sequence_SO=chromosome | SO=protein_coding | is_pseudo=false	6	6	6	6	6	6	6	6	6	6	6	6	72	61373.3	75629.3	63301.8	28037.5	63863.3	48466.8	77418.3	67555.4	56594.4	53418.4	65325.5	71421.8		57085.5	64325.9	61690	183101		0.92536	1.04273		0.696782	0.731266
transcript=PF3D7_0415500.1	>PF3D7_0415500.1-p1 | transcript=PF3D7_0415500.1 | gene=PF3D7_0415500 | organism=Plasmodium_falciparum_3D7 | gene_product=nuclear cap-binding protein subunit 2, putative | transcript_product=nuclear cap-binding protein subunit 2, putative | location=Pf3D7_04_v3:688192-689053(+) | protein_length=234 | sequence_SO=chromosome | SO=protein_coding | is_pseudo=false	9	9	9	9	9	9	9	9	9	9	9	9	108	99165.8	110880	101102	62604.6	113639	95619	109086	101405	94426.4	95480.6	95166.7	118331		93438	104937	100851	299226		0.926494	1.04051		0.568465	0.587061
transcript=PF3D7_0414000.1	>PF3D7_0414000.1-p1 | transcript=PF3D7_0414000.1 | gene=PF3D7_0414000 | organism=Plasmodium_falciparum_3D7 | gene_product=structural maintenance of chromosomes protein 3, putative | transcript_product=structural maintenance of chromosomes protein 3, putative | location=Pf3D7_04_v3:626891-633126(-) | protein_length=1193 | sequence_SO=chromosome | SO=protein_coding | is_pseudo=false	39	39	39	39	39	39	39	39	39	39	39	39	468	63092	137004	129170	97928.8	138742	130296	137103	118924	114750	130169	103185	112482		106799	131266	115146	353211		0.927505	1.13999		0.664706	0.0680108
transcript=PF3D7_0416400.1	>PF3D7_0416400.1-p1 | transcript=PF3D7_0416400.1 | gene=PF3D7_0416400 | organism=Plasmodium_falciparum_3D7 | gene_product=histone acetyltransferase, putative | transcript_product=histone acetyltransferase, putative | location=Pf3D7_04_v3:718202-722654(+) | protein_length=1259 | sequence_SO=chromosome | SO=protein_coding | is_pseudo=false	14	14	14	14	14	14	14	14	14	14	14	14	168	46880.4	59363.2	50438.7	37642.7	60906.1	57872.3	66287.6	71241.8	62214.8	65732.8	65081.1	60197.5		48581.3	64076.9	63306.6	175965		0.767397	1.01217		0.0416523	0.822572
transcript=PF3D7_0416500.1	>PF3D7_0416500.1-p1 | transcript=PF3D7_0416500.1 | gene=PF3D7_0416500 | organism=Plasmodium_falciparum_3D7 | gene_product=repressor of RNA polymerase III transcription MAF1 | transcript_product=repressor of RNA polymerase III transcription MAF1 | location=Pf3D7_04_v3:723073-724242(-) | protein_length=389 | sequence_SO=chromosome | SO=protein_coding | is_pseudo=false	3	3	3	3	3	3	3	3	3	3	3	3	36	57221.7	88260.1	53216	67077.9	72397.2	51108.3	78939.6	86698.5	97779.3	61889.2	88954.4	93348.2		66443.9	72285.9	85492.8	224223		0.777188	0.845521		0.141334	0.279742
transcript=PF3D7_0415000.1	>PF3D7_0415000.1-p1 | transcript=PF3D7_0415000.1 | gene=PF3D7_0415000 | organism=Plasmodium_falciparum_3D7 | gene_product=arsenical pump-driving ATPase, putative | transcript_product=arsenical pump-driving ATPase, putative | location=Pf3D7_04_v3:668578-669717(-) | protein_length=379 | sequence_SO=chromosome | SO=protein_coding | is_pseudo=false	14	14	14	14	14	14	14	14	14	14	14	14	168	124438	126115	115704	75507.1	123558	127145	127033	129685	119304	124829	123574	129270		110441	126855	124244	361540		0.888903	1.02102		0.330591	0.32746
transcript=PF3D7_0415900.1	>PF3D7_0415900.1-p1 | transcript=PF3D7_0415900.1 | gene=PF3D7_0415900 | organism=Plasmodium_falciparum_3D7 | gene_product=60S ribosomal protein L15, putative | transcript_product=60S ribosomal protein L15, putative | location=Pf3D7_04_v3:697918-698768(-) | protein_length=205 | sequence_SO=chromosome | SO=protein_coding | is_pseudo=false	7	7	7	7	7	7	7	7	7	7	7	7	84	709223	534447	673029	267749	647484	778395	791827	650329	491285	560337	573961	720249		546112	717009	586458	1.84958e+06		0.931204	1.22261		0.733598	0.0824421
transcript=PF3D7_0416800.1	>PF3D7_0416800.1-p1 | transcript=PF3D7_0416800.1 | gene=PF3D7_0416800 | organism=Plasmodium_falciparum_3D7 | gene_product=small GTP-binding protein sar1 | transcript_product=small GTP-binding protein sar1 | location=Pf3D7_04_v3:729962-731223(+) | protein_length=192 | sequence_SO=chromosome | SO=protein_coding | is_pseudo=false	18	18	18	18	18	18	18	18	18	18	18	18	216	390309	353112	357568	324040	379047	352522	359514	379816	404814	415830	418196	355332		356257	367725	398543	1.12253e+06		0.893899	0.922673		0.0792131	0.126139
transcript=PF3D7_0418200.1	>PF3D7_0418200.1-p1 | transcript=PF3D7_0418200.1 | gene=PF3D7_0418200 | organism=Plasmodium_falciparum_3D7 | gene_product=eukaryotic translation initiation factor 3 subunit M, putative | transcript_product=eukaryotic translation initiation factor 3 subunit M, putative | location=Pf3D7_04_v3:817400-818689(+) | protein_length=429 | sequence_SO=chromosome | SO=protein_coding | is_pseudo=false	11	11	11	11	11	11	11	11	11	11	11	11	132	88212.8	95025.9	165576	58017.3	79994.5	141288	81664.3	104292	63064.9	66230.2	86971.8	90195		101708	101810	76615.5	280133		1.32751	1.32884		0.358025	0.182242
transcript=PF3D7_0417200.1	>PF3D7_0417200.1-p1 | transcript=PF3D7_0417200.1 | gene=PF3D7_0417200 | organism=Plasmodium_falciparum_3D7 | gene_product=bifunctional dihydrofolate reductase-thymidylate synthase | transcript_product=bifunctional dihydrofolate reductase-thymidylate synthase | location=Pf3D7_04_v3:748088-749914(+) | protein_length=608 | sequence_SO=chromosome | SO=protein_coding | is_pseudo=false	17	17	17	17	17	17	17	17	17	17	17	17	204	996559	1.19845e+06	1.07742e+06	1.29057e+06	1.12626e+06	1184641	1.15023e+06	1.17675e+06	1.09069e+06	1088094	1.12472e+06	1.22178e+06		1.14075e+06	1.15947e+06	1.13132e+06	3.43154e+06		1.00833	1.02488		0.901803	0.453692
transcript=PF3D7_0419400.1	>PF3D7_0419400.1-p1 | transcript=PF3D7_0419400.1 | gene=PF3D7_0419400 | organism=Plasmodium_falciparum_3D7 | gene_product=conserved Plasmodium protein, unknown function | transcript_product=conserved Plasmodium protein, unknown function | location=Pf3D7_04_v3:857998-865957(+) | protein_length=2472 | sequence_SO=chromosome | SO=protein_coding | is_pseudo=false	20	20	20	20	20	20	20	20	20	20	20	20	240	28961.5	22905.8	46842.3	53758.8	48709.7	54904	51309	53891.5	44946	50612.8	57319.5	57577.2		38117.1	52203.5	52613.9	142935		0.724469	0.992201		0.139667	0.907466
transcript=PF3D7_0417500.1	>PF3D7_0417500.1-p1 | transcript=PF3D7_0417500.1 | gene=PF3D7_0417500 | organism=Plasmodium_falciparum_3D7 | gene_product=memo-like protein | transcript_product=memo-like protein | location=Pf3D7_04_v3:777200-779424(-) | protein_length=296 | sequence_SO=chromosome | SO=protein_coding | is_pseudo=false	13	13	13	13	13	13	13	13	13	13	13	13	156	123189	124235	114193	80387.6	114411	92289.5	115924	122455	105739	109230	107092	105607		110501	111270	106917	328688		1.03352	1.04071		0.751076	0.556239
transcript=PF3D7_0418500.1	>PF3D7_0418500.1-p1 | transcript=PF3D7_0418500.1 | gene=PF3D7_0418500 | organism=Plasmodium_falciparum_3D7 | gene_product=trafficking protein particle complex subunit 3, putative | transcript_product=trafficking protein particle complex subunit 3, putative | location=Pf3D7_04_v3:830989-832428(-) | protein_length=187 | sequence_SO=chromosome | SO=protein_coding | is_pseudo=false	3	3	3	3	3	3	3	3	3	3	3	3	36	212912	190746	251067	301742	223741	242104	219684	260602	218573	226286	219940	240906		239117	236533	226426	702076		1.05605	1.04463		0.642008	0.391097
transcript=PF3D7_0419700.1	>PF3D7_0419700.1-p1 | transcript=PF3D7_0419700.1 | gene=PF3D7_0419700 | organism=Plasmodium_falciparum_3D7 | gene_product=apical merozoite protein | transcript_product=apical merozoite protein | location=Pf3D7_04_v3:873138-874115(+) | protein_length=325 | sequence_SO=chromosome | SO=protein_coding | is_pseudo=false	8	8	8	8	8	8	8	8	8	8	8	8	96	29453	31078	33811.8	42707.7	30736.8	14940.7	15382.5	19387.1	26054.9	20580.7	34438.8	12021.8		34262.6	20111.8	23274.1	77648.5		1.47214	0.864127		0.104588	0.616848
transcript=PF3D7_0420300.1	>PF3D7_0420300.1-p1 | transcript=PF3D7_0420300.1 | gene=PF3D7_0420300 | organism=Plasmodium_falciparum_3D7 | gene_product=AP2 domain transcription factor, putative | transcript_product=AP2 domain transcription factor, putative | location=Pf3D7_04_v3:917990-928411(+) | protein_length=3473 | sequence_SO=chromosome | SO=protein_coding | is_pseudo=false	11	11	11	11	11	11	11	11	11	11	11	11	132	22084.1	26461.7	21328.4	32122	23030.3	20074.5	22645.6	20432.8	27722.9	22794.9	12501.3	20742.3		25499	21545.8	20940.4	67985.2		1.2177	1.02891		0.303143	0.863381
transcript=PF3D7_0420600.1	>PF3D7_0420600.1-p1 | transcript=PF3D7_0420600.1 | gene=PF3D7_0420600 | organism=Plasmodium_falciparum_3D7 | gene_product=conserved Plasmodium protein, unknown function | transcript_product=conserved Plasmodium protein, unknown function | location=Pf3D7_04_v3:932463-934244(+) | protein_length=593 | sequence_SO=chromosome | SO=protein_coding | is_pseudo=false	17	17	17	17	17	17	17	17	17	17	17	17	204	73771.6	82988.7	73634.8	83949.9	86435.9	68496.1	76735.1	76881.4	87544.7	83707.1	78243.6	61269.2		78586.2	77137.1	77691.2	233415		1.01152	0.992869		0.895808	0.938717
transcript=PF3D7_0419500.1	>PF3D7_0419500.1-p1 | transcript=PF3D7_0419500.1 | gene=PF3D7_0419500 | organism=Plasmodium_falciparum_3D7 | gene_product=conserved Plasmodium membrane protein, unknown function | transcript_product=conserved Plasmodium membrane protein, unknown function | location=Pf3D7_04_v3:866501-868111(-) | protein_length=536 | sequence_SO=chromosome | SO=protein_coding | is_pseudo=false	8	8	8	8	8	8	8	8	8	8	8	8	96	170124	203847	179131	228375	192487	181206	184720	218915	214205	184015	204308	233276		195369	194332	208951	598653		0.935	0.930037		0.447436	0.316462
transcript=PF3D7_0419600.1	>PF3D7_0419600.1-p1 | transcript=PF3D7_0419600.1 | gene=PF3D7_0419600 | organism=Plasmodium_falciparum_3D7 | gene_product=ran-specific GTPase-activating protein 1, putative | transcript_product=ran-specific GTPase-activating protein 1, putative | location=Pf3D7_04_v3:870737-871873(+) | protein_length=280 | sequence_SO=chromosome | SO=protein_coding | is_pseudo=false	17	17	17	17	17	17	17	17	17	17	17	17	204	1.62564e+06	1.85051e+06	1.56687e+06	1.94595e+06	1.80042e+06	1.70114e+06	1.71497e+06	1.84741e+06	1896685	1.77281e+06	1.67526e+06	1752594		1.74725e+06	1.76598e+06	1.77434e+06	5.28757e+06		0.984731	0.995292		0.800724	0.889867
transcript=PF3D7_0422100.1	>PF3D7_0422100.1-p1 | transcript=PF3D7_0422100.1 | gene=PF3D7_0422100 | organism=Plasmodium_falciparum_3D7 | gene_product=transmembrane emp24 domain-containing protein, putative | transcript_product=transmembrane emp24 domain-containing protein, putative | location=Pf3D7_04_v3:1001613-1002770(+) | protein_length=385 | sequence_SO=chromosome | SO=protein_coding | is_pseudo=false	9	9	9	9	9	9	9	9	9	9	9	9	108	129183	140495	118203	139467	134491	111117	124552	136042	164869	133557	133332	136056		131837	126550	141954	400341		0.928735	0.891491		0.322289	0.162687
transcript=PF3D7_0422700.1	>PF3D7_0422700.1-p1 | transcript=PF3D7_0422700.1 | gene=PF3D7_0422700 | organism=Plasmodium_falciparum_3D7 | gene_product=eukaryotic initiation factor 4A-III, putative | transcript_product=eukaryotic initiation factor 4A-III, putative | location=Pf3D7_04_v3:1040470-1041642(+) | protein_length=390 | sequence_SO=chromosome | SO=protein_coding | is_pseudo=false	11	11	11	11	11	11	11	11	11	11	11	11	132	26344.3	18513.9	20352.2	16261.9	27934.1	28427.5	27255.7	20430.4	23107.7	21273.4	20779.1	30962.5		20368.1	26011.9	24030.7	70410.7		0.847587	1.08245		0.2967	0.537095
transcript=PF3D7_0422400.1	>PF3D7_0422400.1-p1 | transcript=PF3D7_0422400.1 | gene=PF3D7_0422400 | organism=Plasmodium_falciparum_3D7 | gene_product=40S ribosomal protein S19 | transcript_product=40S ribosomal protein S19 | location=Pf3D7_04_v3:1026648-1027399(+) | protein_length=170 | sequence_SO=chromosome | SO=protein_coding | is_pseudo=false	15	15	15	15	15	15	15	15	15	15	15	15	180	3.84087e+06	3.71049e+06	3.75569e+06	3.01362e+06	4.09777e+06	4.048e+06	4.27875e+06	4032762	3.66093e+06	3.51555e+06	3420193	3.78909e+06		3580168	4.11432e+06	3596441	1.12909e+07		0.995475	1.144		0.941153	0.00273026
transcript=PF3D7_0422500.1	>PF3D7_0422500.1-p1 | transcript=PF3D7_0422500.1 | gene=PF3D7_0422500 | organism=Plasmodium_falciparum_3D7 | gene_product=pre-mRNA-splicing helicase BRR2, putative | transcript_product=pre-mRNA-splicing helicase BRR2, putative | location=Pf3D7_04_v3:1029329-1037953(+) | protein_length=2874 | sequence_SO=chromosome | SO=protein_coding | is_pseudo=false	37	37	37	37	37	37	37	37	37	37	37	37	444	403507	405947	437932	529729	402301	397776	402961	452725	489371	431786	421178	445214		444279	413941	446887	1.30511e+06		0.994163	0.926276		0.940659	0.148684
transcript=PF3D7_0423500.1	>PF3D7_0423500.1-p1 | transcript=PF3D7_0423500.1 | gene=PF3D7_0423500 | organism=Plasmodium_falciparum_3D7 | gene_product=glideosome associated protein with multiple membrane spans 2 | transcript_product=glideosome associated protein with multiple membrane spans 2 | location=Pf3D7_04_v3:1058997-1060551(+) | protein_length=372 | sequence_SO=chromosome | SO=protein_coding | is_pseudo=false	7	7	7	7	7	7	7	7	7	7	7	7	84	391532	339397	349678	393629	334217	411851	389101	285733	241143	386122	354756	378587		368559	355226	340152	1.06394e+06		1.08351	1.04431		0.479534	0.743923
transcript=PF3D7_0424600.1	>PF3D7_0424600.1-p1 | transcript=PF3D7_0424600.1 | gene=PF3D7_0424600 | organism=Plasmodium_falciparum_3D7 | gene_product=Plasmodium exported protein (PHISTb), unknown function | transcript_product=Plasmodium exported protein (PHISTb), unknown function | location=Pf3D7_04_v3:1113345-1114486(-) | protein_length=309 | sequence_SO=chromosome | SO=protein_coding | is_pseudo=false	27	27	27	27	27	27	27	27	27	27	27	27	324	30089	30363	19171.9	20304	47018.8	48324.4	55632.9	30171.1	17768	31888.5	36437.3	32184.6		24982	45286.8	29569.6	99838.4		0.844854	1.53153		0.403729	0.0618805
transcript=PF3D7_0423600.1	>PF3D7_0423600.1-p1 | transcript=PF3D7_0423600.1 | gene=PF3D7_0423600 | organism=Plasmodium_falciparum_3D7 | gene_product=conserved Plasmodium protein, unknown function | transcript_product=conserved Plasmodium protein, unknown function | location=Pf3D7_04_v3:1061790-1066628(-) | protein_length=1612 | sequence_SO=chromosome | SO=protein_coding | is_pseudo=false	11	11	11	11	11	11	11	11	11	11	11	11	132	76645.7	89647.7	1.1014e+06	1.37786e+06	82711	85842.2	78687.5	88296.3	82555.2	1.14657e+06	85007.3	17008.2		661388	83884.2	332784	1.07806e+06		1.98744	0.252068		0.479052	0.427207
transcript=PF3D7_0423700.1	>PF3D7_0423700.1-p1 | transcript=PF3D7_0423700.1 | gene=PF3D7_0423700 | organism=Plasmodium_falciparum_3D7 | gene_product=early transcribed membrane protein 4 | transcript_product=early transcribed membrane protein 4 | location=Pf3D7_04_v3:1071435-1071845(-) | protein_length=136 | sequence_SO=chromosome | SO=protein_coding | is_pseudo=false	3	3	3	3	3	3	3	3	3	3	3	3	36	3.02543e+06	3.91567e+06	3.40109e+06	3.69894e+06	3.22567e+06	2.43601e+06	2772058	3893051	3.74032e+06	4.26701e+06	4.05709e+06	2.28096e+06		3.51028e+06	3.0817e+06	3.58634e+06	1.01783e+07		0.978791	0.859287		0.883595	0.396555
transcript=PF3D7_0500800.1	>PF3D7_0500800.1-p1 | transcript=PF3D7_0500800.1 | gene=PF3D7_0500800 | organism=Plasmodium_falciparum_3D7 | gene_product=mature parasite-infected erythrocyte surface antigen | transcript_product=mature parasite-infected erythrocyte surface antigen | location=Pf3D7_05_v3:43327-47761(-) | protein_length=1434 | sequence_SO=chromosome | SO=protein_coding | is_pseudo=false	107	107	107	107	107	107	107	107	107	107	107	107	1284	10178447	10915548	10199750	13467751	12034006	10444211	11306870	11143891	12486156	11098087	11460715	11977104		11190374	1.12322e+07	1.17555e+07	34178134		0.951925	0.955487		0.536696	0.284678
transcript=PF3D7_0501000.1	>PF3D7_0501000.1-p1 | transcript=PF3D7_0501000.1 | gene=PF3D7_0501000 | organism=Plasmodium_falciparum_3D7 | gene_product=Plasmodium exported protein, unknown function | transcript_product=Plasmodium exported protein, unknown function | location=Pf3D7_05_v3:55841-56872(+) | protein_length=260 | sequence_SO=chromosome | SO=protein_coding | is_pseudo=false	10	10	10	10	10	10	10	10	10	10	10	10	120	1.28984e+06	1.27084e+06	1.17951e+06	1.24473e+06	777586	731802	703629	569044	1351886	987564	605322	760754		1.24623e+06	695515	926381	2.86813e+06		1.34526	0.750787		0.142134	0.252153
transcript=PF3D7_0501100.1;transcript=PF3D7_0501100.2	>PF3D7_0501100.1-p1 | transcript=PF3D7_0501100.1 | gene=PF3D7_0501100 | organism=Plasmodium_falciparum_3D7 | gene_product=heat shock protein 40, type II | transcript_product=heat shock protein 40, type II | location=Pf3D7_05_v3:58037-59726(-) | protein_length=402 | sequence_SO=chromosome | SO=protein_coding | is_pseudo=false;>PF3D7_0501100.2-p1 | transcript=PF3D7_0501100.2 | gene=PF3D7_0501100 | …	15	15	15	15	15	15	15	15	15	15	15	15	180	281190	304275	266067	337984	274252	272083	267841	287120	322132	293171	299355	289458		297379	275324	301029	873732		0.987876	0.91461		0.842445	0.0302968
transcript=PF3D7_0501500.1	>PF3D7_0501500.1-p1 | transcript=PF3D7_0501500.1 | gene=PF3D7_0501500 | organism=Plasmodium_falciparum_3D7 | gene_product=rhoptry-associated protein 3 | transcript_product=rhoptry-associated protein 3 | location=Pf3D7_05_v3:81134-82336(-) | protein_length=400 | sequence_SO=chromosome | SO=protein_coding | is_pseudo=false	17	17	17	17	17	17	17	17	17	17	17	17	204	102291	87689.2	79391.9	55788.9	87375.5	88929.4	84495.9	98421.8	79440.2	83734.9	91958.1	80970		81290.2	89805.7	84025.8	255122		0.967443	1.06879		0.802156	0.209317
transcript=PF3D7_0501200.1	>PF3D7_0501200.1-p1 | transcript=PF3D7_0501200.1 | gene=PF3D7_0501200 | organism=Plasmodium_falciparum_3D7 | gene_product=parasite-infected erythrocyte surface protein | transcript_product=parasite-infected erythrocyte surface protein | location=Pf3D7_05_v3:64065-65489(+) | protein_length=408 | sequence_SO=chromosome | SO=protein_coding | is_pseudo=false	17	17	17	17	17	17	17	17	17	17	17	17	204	833674	1.00724e+06	893461	927348	905736	825008	888221	923740	913035	863762	851352	972227		915432	885676	900094	2.7012e+06		1.01704	0.983982		0.748148	0.694579
transcript=PF3D7_0501300.1	>PF3D7_0501300.1-p1 | transcript=PF3D7_0501300.1 | gene=PF3D7_0501300 | organism=Plasmodium_falciparum_3D7 | gene_product=skeleton-binding protein 1 | transcript_product=skeleton-binding protein 1 | location=Pf3D7_05_v3:68930-70113(+) | protein_length=337 | sequence_SO=chromosome | SO=protein_coding | is_pseudo=false	8	8	8	8	8	8	8	8	8	8	8	8	96	682554	856189	855651	968048	926070	827299	910532	781298	1044860	905304	1.08679e+06	974908		840611	861300	1.00297e+06	2.70488e+06		0.838125	0.858753		0.0687355	0.036833
transcript=PF3D7_0501600.1	>PF3D7_0501600.1-p1 | transcript=PF3D7_0501600.1 | gene=PF3D7_0501600 | organism=Plasmodium_falciparum_3D7 | gene_product=rhoptry-associated protein 2 | transcript_product=rhoptry-associated protein 2 | location=Pf3D7_05_v3:84041-85237(-) | protein_length=398 | sequence_SO=chromosome | SO=protein_coding | is_pseudo=false	20	20	20	20	20	20	20	20	20	20	20	20	240	132143	127338	113699	37318.1	125435	140061	157967	125020	59709.9	80400.9	114258	142297		102625	137121	99166.6	338912		1.03487	1.38273		0.908086	0.12732
transcript=PF3D7_0501800.1	>PF3D7_0501800.1-p1 | transcript=PF3D7_0501800.1 | gene=PF3D7_0501800 | organism=Plasmodium_falciparum_3D7 | gene_product=chromatin assembly factor 1 subunit A | transcript_product=chromatin assembly factor 1 subunit A | location=Pf3D7_05_v3:91361-94591(+) | protein_length=1076 | sequence_SO=chromosome | SO=protein_coding | is_pseudo=false	17	17	17	17	17	17	17	17	17	17	17	17	204	181274	197580	179334	218642	189293	170921	170688	177979	204959	184720	178088	174565		194207	177220	185583	557011		1.04647	0.954937		0.479034	0.346794
transcript=PF3D7_0502100.1	>PF3D7_0502100.1-p1 | transcript=PF3D7_0502100.1 | gene=PF3D7_0502100 | organism=Plasmodium_falciparum_3D7 | gene_product=HCNGP-like protein | transcript_product=HCNGP-like protein | location=Pf3D7_05_v3:102193-102897(-) | protein_length=234 | sequence_SO=chromosome | SO=protein_coding | is_pseudo=false	4	4	4	4	4	4	4	4	4	4	4	4	48	277512	322789	218722	276879	276016	210784	233627	207792	234606	250303	277855	275446		273975	232055	259553	765583		1.05557	0.894056		0.573516	0.20265
transcript=PF3D7_0503300.1	>PF3D7_0503300.1-p1 | transcript=PF3D7_0503300.1 | gene=PF3D7_0503300 | organism=Plasmodium_falciparum_3D7 | gene_product=serine/arginine-rich splicing factor 12 | transcript_product=serine/arginine-rich splicing factor 12 | location=Pf3D7_05_v3:135004-135930(-) | protein_length=308 | sequence_SO=chromosome | SO=protein_coding | is_pseudo=false	9	9	9	9	9	9	9	9	9	9	9	9	108	954071	1.001e+06	735251	1.01445e+06	1.06447e+06	856176	923478	897972	1.01135e+06	966232	888982	983349		926193	935524	962477	2.82419e+06		0.962301	0.971996		0.632053	0.628542
transcript=PF3D7_0504600.1	>PF3D7_0504600.1-p1 | transcript=PF3D7_0504600.1 | gene=PF3D7_0504600 | organism=Plasmodium_falciparum_3D7 | gene_product=2-oxoisovalerate dehydrogenase subunit beta, mitochondrial, putative | transcript_product=2-oxoisovalerate dehydrogenase subunit beta, mitochondrial, putative | location=Pf3D7_05_v3:177410-178555(+) | protein_length=381 | sequence_SO=chromosome | SO=protein_coding | is_pseudo=…	5	5	5	5	5	5	5	5	5	5	5	5	60	90493.7	94182.4	90896.6	23877.1	73604.9	26090.5	76243.9	80569.4	89348	93066.3	13313.1	101108		74862.5	64127.2	74208.9	213199		1.00881	0.864143		0.981221	0.692984
transcript=PF3D7_0504800.1	>PF3D7_0504800.1-p1 | transcript=PF3D7_0504800.1 | gene=PF3D7_0504800 | organism=Plasmodium_falciparum_3D7 | gene_product=conserved Plasmodium protein, unknown function | transcript_product=conserved Plasmodium protein, unknown function | location=Pf3D7_05_v3:187813-204732(-) | protein_length=5639 | sequence_SO=chromosome | SO=protein_coding | is_pseudo=false	33	33	33	33	33	33	33	33	33	33	33	33	396	23043.9	22425.6	24326.6	25624.3	18201	21885.3	23628.8	31232.2	17474	29516.8	19384.8	21627		23855.1	23736.9	22000.7	69592.6		1.08429	1.07892		0.541238	0.664693
transcript=PF3D7_0505000.1	>PF3D7_0505000.1-p1 | transcript=PF3D7_0505000.1 | gene=PF3D7_0505000 | organism=Plasmodium_falciparum_3D7 | gene_product=MMS19-like protein, putative | transcript_product=MMS19-like protein, putative | location=Pf3D7_05_v3:209062-218189(-) | protein_length=2975 | sequence_SO=chromosome | SO=protein_coding | is_pseudo=false	3	3	3	3	3	3	3	3	3	3	3	3	36	65032.4	22580.5	65571.9	17323.9	53009.6	69732.4	67765.5	74434.8	58663.4	24385.8	68389.6	20570.3		42627.2	66235.6	43002.3	151865		0.991278	1.54028		0.983893	0.148482
transcript=PF3D7_0503400.1	>PF3D7_0503400.1-p1 | transcript=PF3D7_0503400.1 | gene=PF3D7_0503400 | organism=Plasmodium_falciparum_3D7 | gene_product=actin-depolymerizing factor 1 | transcript_product=actin-depolymerizing factor 1 | location=Pf3D7_05_v3:140710-141471(+) | protein_length=122 | sequence_SO=chromosome | SO=protein_coding | is_pseudo=false	6	6	6	6	6	6	6	6	6	6	6	6	72	1.3311e+06	975122	2015113	1.9095e+06	1489394	1.65447e+06	1.453e+06	1.27664e+06	1.08611e+06	1.85089e+06	1.41144e+06	1.43481e+06		1.55771e+06	1.46838e+06	1.44581e+06	4.4719e+06		1.07739	1.01561		0.716427	0.903017
transcript=PF3D7_0503800.1	>PF3D7_0503800.1-p1 | transcript=PF3D7_0503800.1 | gene=PF3D7_0503800 | organism=Plasmodium_falciparum_3D7 | gene_product=60S ribosomal protein L31 | transcript_product=60S ribosomal protein L31 | location=Pf3D7_05_v3:151422-152384(-) | protein_length=120 | sequence_SO=chromosome | SO=protein_coding | is_pseudo=false	5	5	5	5	5	5	5	5	5	5	5	5	60	292568	229192	338302	217860	294956	327969	324203	303371	213164	273961	272464	321252		269481	312625	270210	852316		0.997299	1.15697		0.98446	0.150208
transcript=PF3D7_0505100.1	>PF3D7_0505100.1-p1 | transcript=PF3D7_0505100.1 | gene=PF3D7_0505100 | organism=Plasmodium_falciparum_3D7 | gene_product=trafficking protein particle complex subunit 8, putative | transcript_product=trafficking protein particle complex subunit 8, putative | location=Pf3D7_05_v3:220839-229253(+) | protein_length=2754 | sequence_SO=chromosome | SO=protein_coding | is_pseudo=false	15	15	15	15	15	15	15	15	15	15	15	15	180	748865	1.04004e+06	733590	743233	826469	680742	713186	815622	170342	850442	818540	721122		816432	759005	640112	2215548		1.27545	1.18574		0.368953	0.514196
transcript=PF3D7_0505600.1	>PF3D7_0505600.1-p1 | transcript=PF3D7_0505600.1 | gene=PF3D7_0505600 | organism=Plasmodium_falciparum_3D7 | gene_product=conserved protein, unknown function | transcript_product=conserved protein, unknown function | location=Pf3D7_05_v3:245933-246934(+) | protein_length=333 | sequence_SO=chromosome | SO=protein_coding | is_pseudo=false	4	4	4	4	4	4	4	4	4	4	4	4	48	21449.6	50773.8	76037.7	14758.5	66182.2	75399.3	69336.6	89140.3	85994.6	63609.6	89852.6	20042.1		40754.9	75014.6	64874.7	180644		0.628209	1.1563		0.302585	0.582344
transcript=PF3D7_0505700.1	>PF3D7_0505700.1-p1 | transcript=PF3D7_0505700.1 | gene=PF3D7_0505700 | organism=Plasmodium_falciparum_3D7 | gene_product=conserved Plasmodium membrane protein, unknown function | transcript_product=conserved Plasmodium membrane protein, unknown function | location=Pf3D7_05_v3:247801-250575(-) | protein_length=924 | sequence_SO=chromosome | SO=protein_coding | is_pseudo=false	12	12	12	12	12	12	12	12	12	12	12	12	144	30066.1	34951.8	30621.7	41452.8	29004.6	31813.3	36870.9	28658.4	39345.3	27832.2	46192.5	32222.2		34273.1	31586.8	36398.1	102258		0.941619	0.867816		0.677004	0.337842
transcript=PF3D7_0505200.1	>PF3D7_0505200.1-p1 | transcript=PF3D7_0505200.1 | gene=PF3D7_0505200 | organism=Plasmodium_falciparum_3D7 | gene_product=actin-like protein, putative | transcript_product=actin-like protein, putative | location=Pf3D7_05_v3:230695-232392(+) | protein_length=565 | sequence_SO=chromosome | SO=protein_coding | is_pseudo=false	14	14	14	14	14	14	14	14	14	14	14	14	168	195973	198482	165967	181069	212823	219257	202083	217055	219641	186048	198328	247987		185372	212805	213001	611178		0.870289	0.999078		0.139019	0.989649
transcript=PF3D7_0506100.1	>PF3D7_0506100.1-p1 | transcript=PF3D7_0506100.1 | gene=PF3D7_0506100 | organism=Plasmodium_falciparum_3D7 | gene_product=60S ribosomal subunit protein L24, putative | transcript_product=60S ribosomal subunit protein L24, putative | location=Pf3D7_05_v3:257748-258831(-) | protein_length=204 | sequence_SO=chromosome | SO=protein_coding | is_pseudo=false	5	5	5	5	5	5	5	5	5	5	5	5	60	86091	83057.6	80274.9	97831.2	88776.3	74304.9	80321	84200	92734.4	99140.2	94807.2	82099.6		86813.7	81900.5	92195.3	260910		0.941628	0.888337		0.348559	0.0742678
transcript=PF3D7_0506800.1	>PF3D7_0506800.1-p1 | transcript=PF3D7_0506800.1 | gene=PF3D7_0506800 | organism=Plasmodium_falciparum_3D7 | gene_product=transcription factor 25, putative | transcript_product=transcription factor 25, putative | location=Pf3D7_05_v3:284691-288023(+) | protein_length=929 | sequence_SO=chromosome | SO=protein_coding | is_pseudo=false	5	5	5	5	5	5	5	5	5	5	5	5	60	16524.6	11342.1	16659.3	11252.2	15507.7	12500	36449.6	17151.8	13335.3	15059.2	16108	17285.6		13944.5	20402.3	15447	49793.8		0.902735	1.32079		0.430968	0.431216
transcript=PF3D7_0505500.1	>PF3D7_0505500.1-p1 | transcript=PF3D7_0505500.1 | gene=PF3D7_0505500 | organism=Plasmodium_falciparum_3D7 | gene_product=DNA mismatch repair protein MSH6, putative | transcript_product=DNA mismatch repair protein MSH6, putative | location=Pf3D7_05_v3:239456-243880(-) | protein_length=1350 | sequence_SO=chromosome | SO=protein_coding | is_pseudo=false	41	41	41	41	41	41	41	41	41	41	41	41	492	114540	119769	119406	87442.6	110436	115094	111832	134664	116967	118926	114555	108311		110289	118007	114690	342985		0.961633	1.02892		0.617129	0.615153
transcript=PF3D7_0505800.1	>PF3D7_0505800.1-p1 | transcript=PF3D7_0505800.1 | gene=PF3D7_0505800 | organism=Plasmodium_falciparum_3D7 | gene_product=small ubiquitin-related modifier | transcript_product=small ubiquitin-related modifier | location=Pf3D7_05_v3:252047-252606(-) | protein_length=100 | sequence_SO=chromosome | SO=protein_coding | is_pseudo=false	13	13	13	13	13	13	13	13	13	13	13	13	156	2.05682e+06	2.32425e+06	2.23033e+06	2.77639e+06	2.37823e+06	2124112	2.23943e+06	2.19849e+06	2.28972e+06	2.2849e+06	2375585	2.5825e+06		2.34695e+06	2.23507e+06	2.38317e+06	6.96519e+06		0.9848	0.937853		0.839894	0.145653
transcript=PF3D7_0506900.1	>PF3D7_0506900.1-p1 | transcript=PF3D7_0506900.1 | gene=PF3D7_0506900 | organism=Plasmodium_falciparum_3D7 | gene_product=rhomboid protease ROM4 | transcript_product=rhomboid protease ROM4 | location=Pf3D7_05_v3:288776-291055(-) | protein_length=759 | sequence_SO=chromosome | SO=protein_coding | is_pseudo=false	24	24	24	24	24	24	24	24	24	24	24	24	288	548618	622177	520754	640586	569970	486618	519312	549533	576796	576222	544330	504468		583034	531358	550454	1.66485e+06		1.05919	0.965309		0.375614	0.473413
transcript=PF3D7_0507100.1	>PF3D7_0507100.1-p1 | transcript=PF3D7_0507100.1 | gene=PF3D7_0507100 | organism=Plasmodium_falciparum_3D7 | gene_product=60S ribosomal protein L4 | transcript_product=60S ribosomal protein L4 | location=Pf3D7_05_v3:294668-295903(-) | protein_length=411 | sequence_SO=chromosome | SO=protein_coding | is_pseudo=false	23	23	23	23	23	23	23	23	23	23	23	23	276	2.18187e+06	1.94033e+06	1.84047e+06	1.25696e+06	2.128e+06	2.40361e+06	2.53756e+06	2679456	2.06257e+06	1.94799e+06	2.38311e+06	2415533		1.80491e+06	2.43715e+06	2.2023e+06	6.44436e+06		0.819555	1.10664		0.143409	0.205187
transcript=PF3D7_0507500.1	>PF3D7_0507500.1-p1 | transcript=PF3D7_0507500.1 | gene=PF3D7_0507500 | organism=Plasmodium_falciparum_3D7 | gene_product=subtilisin-like protease 1 | transcript_product=subtilisin-like protease 1 | location=Pf3D7_05_v3:307490-309556(-) | protein_length=688 | sequence_SO=chromosome | SO=protein_coding | is_pseudo=false	16	16	16	16	16	16	16	16	16	16	16	16	192	140212	135010	56859.9	79658.4	128932	124588	125668	80246.6	150739	119936	136885	140110		102935	114859	136918	354711		0.751802	0.838889		0.198308	0.160156
transcript=PF3D7_0507800.1	>PF3D7_0507800.1-p1 | transcript=PF3D7_0507800.1 | gene=PF3D7_0507800 | organism=Plasmodium_falciparum_3D7 | gene_product=conserved protein, unknown function | transcript_product=conserved protein, unknown function | location=Pf3D7_05_v3:322239-326822(+) | protein_length=1527 | sequence_SO=chromosome | SO=protein_coding | is_pseudo=false	16	16	16	16	16	16	16	16	16	16	16	16	192	31609.9	41407.3	28753	40692.6	28626.7	41590.5	42262.6	23801	33565.5	42357.3	24395.7	39824.7		35615.7	34070.2	35035.8	104722		1.01655	0.97244		0.913663	0.880081
transcript=PF3D7_0507600.1	>PF3D7_0507600.1-p1 | transcript=PF3D7_0507600.1 | gene=PF3D7_0507600 | organism=Plasmodium_falciparum_3D7 | gene_product=protein CAF40, putative | transcript_product=protein CAF40, putative | location=Pf3D7_05_v3:313199-315157(+) | protein_length=652 | sequence_SO=chromosome | SO=protein_coding | is_pseudo=false	10	10	10	10	10	10	10	10	10	10	10	10	120	135410	157208	144191	136104	150086	142361	124404	160892	153419	145573	143603	136580		143228	144436	144794	432458		0.989187	0.997528		0.808278	0.968082
transcript=PF3D7_0508800.1	>PF3D7_0508800.1-p1 | transcript=PF3D7_0508800.1 | gene=PF3D7_0508800 | organism=Plasmodium_falciparum_3D7 | gene_product=single-stranded DNA-binding protein | transcript_product=single-stranded DNA-binding protein | location=Pf3D7_05_v3:363588-364442(-) | protein_length=284 | sequence_SO=chromosome | SO=protein_coding | is_pseudo=false	8	8	8	8	8	8	8	8	8	8	8	8	96	29064.1	32319	41431.2	20546.3	88567.5	84542.7	46591.2	67604.9	41158	61541.8	53571.4	18195.4		30840.2	71826.6	43616.7	146283		0.707073	1.64677		0.28336	0.0806913
transcript=PF3D7_0507700.1	>PF3D7_0507700.1-p1 | transcript=PF3D7_0507700.1 | gene=PF3D7_0507700 | organism=Plasmodium_falciparum_3D7 | gene_product=nuclear protein localization protein 4, putative | transcript_product=nuclear protein localization protein 4, putative | location=Pf3D7_05_v3:316766-318361(-) | protein_length=531 | sequence_SO=chromosome | SO=protein_coding | is_pseudo=false	16	16	16	16	16	16	16	16	16	16	16	16	192	318092	310502	327229	351728	301769	311092	301936	329629	325492	334998	342679	323335		326888	311107	331626	969620		0.985712	0.938125		0.658522	0.0463335
transcript=PF3D7_0508000.1	>PF3D7_0508000.1-p1 | transcript=PF3D7_0508000.1 | gene=PF3D7_0508000 | organism=Plasmodium_falciparum_3D7 | gene_product=6-cysteine protein | transcript_product=6-cysteine protein | location=Pf3D7_05_v3:328666-329715(-) | protein_length=349 | sequence_SO=chromosome | SO=protein_coding | is_pseudo=false	13	13	13	13	13	13	13	13	13	13	13	13	156	549956	660584	777707	713426	590986	645706	585882	605632	602227	544734	528022	536416		675418	607051	552850	1.83532e+06		1.2217	1.09804		0.079087	0.0476306
transcript=PF3D7_0509400.1	>PF3D7_0509400.1-p1 | transcript=PF3D7_0509400.1 | gene=PF3D7_0509400 | organism=Plasmodium_falciparum_3D7 | gene_product=RNA polymerase I | transcript_product=RNA polymerase I | location=Pf3D7_05_v3:389914-398997(-) | protein_length=2914 | sequence_SO=chromosome | SO=protein_coding | is_pseudo=false	5	5	5	5	5	5	5	5	5	5	5	5	60	13952.2	144385	173967	20277.8	178169	174467	12384.4	147071	30052.4	126058	161977	14932.1		88145.6	128023	83255	299423		1.05874	1.53772		0.93197	0.432362
transcript=PF3D7_0508900.1	>PF3D7_0508900.1-p1 | transcript=PF3D7_0508900.1 | gene=PF3D7_0508900 | organism=Plasmodium_falciparum_3D7 | gene_product=conserved Plasmodium protein, unknown function | transcript_product=conserved Plasmodium protein, unknown function | location=Pf3D7_05_v3:367022-376426(+) | protein_length=3134 | sequence_SO=chromosome | SO=protein_coding | is_pseudo=false	42	42	42	42	42	42	42	42	42	42	42	42	504	367843	411985	109790	45929.3	251103	38224	238154	221793	41697.2	98378.3	179309	108933		233887	187319	107079	528285		2.18424	1.74934		0.263761	0.224627
transcript=PF3D7_0509000.1	>PF3D7_0509000.1-p1 | transcript=PF3D7_0509000.1 | gene=PF3D7_0509000 | organism=Plasmodium_falciparum_3D7 | gene_product=alpha-soluble NSF attachment protein, putative | transcript_product=alpha-soluble NSF attachment protein, putative | location=Pf3D7_05_v3:376855-378452(-) | protein_length=298 | sequence_SO=chromosome | SO=protein_coding | is_pseudo=false	9	9	9	9	9	9	9	9	9	9	9	9	108	206207	192394	165814	12272.5	154723	164623	170260	147690	18188.3	206279	25431	160579		144172	159324	102619	406115		1.40492	1.55257		0.548369	0.319782
transcript=PF3D7_0510100.1	>PF3D7_0510100.1-p1 | transcript=PF3D7_0510100.1 | gene=PF3D7_0510100 | organism=Plasmodium_falciparum_3D7 | gene_product=conserved protein, unknown function | transcript_product=conserved protein, unknown function | location=Pf3D7_05_v3:422746-430353(-) | protein_length=2535 | sequence_SO=chromosome | SO=protein_coding | is_pseudo=false	61	61	61	61	61	61	61	61	61	61	61	61	732	284755	398803	277075	326473	328459	292243	299836	327838	348001	327793	333126	335728		321777	312094	336162	970033		0.957208	0.928404		0.643676	0.0771911
transcript=PF3D7_0511000.1	>PF3D7_0511000.1-p1 | transcript=PF3D7_0511000.1 | gene=PF3D7_0511000 | organism=Plasmodium_falciparum_3D7 | gene_product=translationally-controlled tumor protein homolog | transcript_product=translationally-controlled tumor protein homolog | location=Pf3D7_05_v3:467585-468100(-) | protein_length=171 | sequence_SO=chromosome | SO=protein_coding | is_pseudo=false	5	5	5	5	5	5	5	5	5	5	5	5	60	1.84161e+06	1.99787e+06	1.91036e+06	2.35974e+06	2096034	1.69845e+06	1.79646e+06	1.9723e+06	2.14994e+06	1.98902e+06	1.80933e+06	1.82953e+06		2.0274e+06	1.89081e+06	1.94446e+06	5.86267e+06		1.04265	0.972412		0.577851	0.668534
transcript=PF3D7_0511500.1	>PF3D7_0511500.1-p1 | transcript=PF3D7_0511500.1 | gene=PF3D7_0511500 | organism=Plasmodium_falciparum_3D7 | gene_product=RNA pseudouridylate synthase, putative | transcript_product=RNA pseudouridylate synthase, putative | location=Pf3D7_05_v3:486602-516787(+) | protein_length=10061 | sequence_SO=chromosome | SO=protein_coding | is_pseudo=false	64	64	64	64	64	64	64	64	64	64	64	64	768	141272	151772	126070	150736	140542	122378	125646	138298	146963	144767	138519	122833		142463	131716	138271	412449		1.03032	0.952596		0.622167	0.391395
transcript=PF3D7_0512200.1	>PF3D7_0512200.1-p1 | transcript=PF3D7_0512200.1 | gene=PF3D7_0512200 | organism=Plasmodium_falciparum_3D7 | gene_product=glutathione synthetase | transcript_product=glutathione synthetase | location=Pf3D7_05_v3:529934-531901(-) | protein_length=655 | sequence_SO=chromosome | SO=protein_coding | is_pseudo=false	17	17	17	17	17	17	17	17	17	17	17	17	204	40780.7	42172.7	44353.2	47299	35180.6	40655.4	40469.6	45052.9	39195.1	42957.7	37140.9	37970.2		43651.4	40339.6	39316	123307		1.11027	1.02604		0.0647221	0.686424
transcript=PF3D7_0511800.1	>PF3D7_0511800.1-p1 | transcript=PF3D7_0511800.1 | gene=PF3D7_0511800 | organism=Plasmodium_falciparum_3D7 | gene_product=inositol-3-phosphate synthase | transcript_product=inositol-3-phosphate synthase | location=Pf3D7_05_v3:520720-522693(-) | protein_length=604 | sequence_SO=chromosome | SO=protein_coding | is_pseudo=false	46	46	46	46	46	46	46	46	46	46	46	46	552	3.79494e+06	4.10697e+06	3.447e+06	3714254	3591937	3.05065e+06	3.27945e+06	3.46124e+06	3.48624e+06	3.38814e+06	3.64472e+06	3784114		3.76579e+06	3.34582e+06	3.5758e+06	1.06874e+07		1.05313	0.935683		0.291216	0.171055
transcript=PF3D7_0512700.1	>PF3D7_0512700.1-p1 | transcript=PF3D7_0512700.1 | gene=PF3D7_0512700 | organism=Plasmodium_falciparum_3D7 | gene_product=orotate phosphoribosyltransferase | transcript_product=orotate phosphoribosyltransferase | location=Pf3D7_05_v3:546734-547579(-) | protein_length=281 | sequence_SO=chromosome | SO=protein_coding | is_pseudo=false	8	8	8	8	8	8	8	8	8	8	8	8	96	47880.8	43492.6	48218.5	24729.6	27477.8	48988.2	27953.7	43901.6	33656.6	24421.4	38412	34579		41080.4	37080.3	32767.2	110928		1.2537	1.13163		0.248928	0.523628
transcript=PF3D7_0513100.1	>PF3D7_0513100.1-p1 | transcript=PF3D7_0513100.1 | gene=PF3D7_0513100 | organism=Plasmodium_falciparum_3D7 | gene_product=conserved protein, unknown function | transcript_product=conserved protein, unknown function | location=Pf3D7_05_v3:557039-558012(-) | protein_length=251 | sequence_SO=chromosome | SO=protein_coding | is_pseudo=false	5	5	5	5	5	5	5	5	5	5	5	5	60	68825.5	61069.4	93597.3	67862.2	71351.7	70383.5	74639.1	80557.1	67051	59729.5	62266.6	63548.4		72838.6	74232.9	63148.9	210220		1.15344	1.17552		0.268978	0.00927635
transcript=PF3D7_0512000.1	>PF3D7_0512000.1-p1 | transcript=PF3D7_0512000.1 | gene=PF3D7_0512000 | organism=Plasmodium_falciparum_3D7 | gene_product=prefoldin subunit 6, putative | transcript_product=prefoldin subunit 6, putative | location=Pf3D7_05_v3:527639-528666(+) | protein_length=119 | sequence_SO=chromosome | SO=protein_coding | is_pseudo=false	13	13	13	13	13	13	13	13	13	13	13	13	156	447997	554931	449809	580355	494471	469668	482733	466818	461604	519006	489716	511094		508273	478422	495355	1.48205e+06		1.02608	0.965818		0.745239	0.297449
transcript=PF3D7_0512600.1	>PF3D7_0512600.1-p1 | transcript=PF3D7_0512600.1 | gene=PF3D7_0512600 | organism=Plasmodium_falciparum_3D7 | gene_product=ras-related protein Rab-1B | transcript_product=ras-related protein Rab-1B | location=Pf3D7_05_v3:544540-545993(+) | protein_length=200 | sequence_SO=chromosome | SO=protein_coding | is_pseudo=false	13	13	13	13	13	13	13	13	13	13	13	13	156	2.0862e+06	1975205	2.02879e+06	2122019	2000360	2.08527e+06	2.17265e+06	2.09548e+06	2154873	2.20044e+06	1.86684e+06	2.03604e+06		2.05305e+06	2.08844e+06	2.06455e+06	6.20604e+06		0.994433	1.01157		0.894077	0.785294
transcript=PF3D7_0513300.1	>PF3D7_0513300.1-p1 | transcript=PF3D7_0513300.1 | gene=PF3D7_0513300 | organism=Plasmodium_falciparum_3D7 | gene_product=purine nucleoside phosphorylase | transcript_product=purine nucleoside phosphorylase | location=Pf3D7_05_v3:569182-569919(-) | protein_length=245 | sequence_SO=chromosome | SO=protein_coding | is_pseudo=false	21	21	21	21	21	21	21	21	21	21	21	21	252	2.17232e+06	2.22299e+06	1.95929e+06	1.65101e+06	2.12089e+06	2.06862e+06	2.13507e+06	2061526	1.99397e+06	1.94347e+06	1.78732e+06	2.07589e+06		2.0014e+06	2096527	1.95016e+06	6.04809e+06		1.02628	1.07505		0.73808	0.090866
transcript=PF3D7_0514900.1	>PF3D7_0514900.1-p1 | transcript=PF3D7_0514900.1 | gene=PF3D7_0514900 | organism=Plasmodium_falciparum_3D7 | gene_product=conserved Plasmodium protein, unknown function | transcript_product=conserved Plasmodium protein, unknown function | location=Pf3D7_05_v3:618629-619945(+) | protein_length=438 | sequence_SO=chromosome | SO=protein_coding | is_pseudo=false	2	2	2	2	2	2	2	2	2	2	2	2	24	37763.1	11820	12523.5	19759.4	20191.9	17817.6	24188.4	22267.7	26059.6	12342.5	27364.5	24648.6		20466.5	21116.4	22603.8	64186.7		0.905446	0.934196		0.771759	0.71055
transcript=PF3D7_0513600.1	>PF3D7_0513600.1-p1 | transcript=PF3D7_0513600.1 | gene=PF3D7_0513600 | organism=Plasmodium_falciparum_3D7 | gene_product=deoxyribodipyrimidine photo-lyase, putative | transcript_product=deoxyribodipyrimidine photo-lyase, putative | location=Pf3D7_05_v3:574941-578505(-) | protein_length=1113 | sequence_SO=chromosome | SO=protein_coding | is_pseudo=false	37	37	37	37	37	37	37	37	37	37	37	37	444	414702	448073	364395	432647	415279	391332	396016	422395	424859	437915	416313	417246		414954	406256	424083	1.24529e+06		0.978473	0.957962		0.657322	0.101423
transcript=PF3D7_0513800.1	>PF3D7_0513800.1-p1 | transcript=PF3D7_0513800.1 | gene=PF3D7_0513800 | organism=Plasmodium_falciparum_3D7 | gene_product=ras-related protein Rab-1A | transcript_product=ras-related protein Rab-1A | location=Pf3D7_05_v3:585357-585980(-) | protein_length=207 | sequence_SO=chromosome | SO=protein_coding | is_pseudo=false	5	5	5	5	5	5	5	5	5	5	5	5	60	489243	450611	394284	363204	527194	521805	589083	559123	532650	395008	446932	482778		424335	549301	464342	1.43798e+06		0.913842	1.18297		0.361155	0.0536852
transcript=PF3D7_0516700.1	>PF3D7_0516700.1-p1 | transcript=PF3D7_0516700.1 | gene=PF3D7_0516700 | organism=Plasmodium_falciparum_3D7 | gene_product=ubiquitin carboxyl-terminal hydrolase 2, putative | transcript_product=ubiquitin carboxyl-terminal hydrolase 2, putative | location=Pf3D7_05_v3:694492-698778(+) | protein_length=1332 | sequence_SO=chromosome | SO=protein_coding | is_pseudo=false	13	13	13	13	13	13	13	13	13	13	13	13	156	43459.8	40875.8	58521.5	34301.9	39232.3	50334.8	38056.1	83255.9	34232.3	32963	34735.8	36960.6		44289.7	52719.8	34722.9	131732		1.27552	1.5183		0.15774	0.18639
transcript=PF3D7_0516800.1	>PF3D7_0516800.1-p1 | transcript=PF3D7_0516800.1 | gene=PF3D7_0516800 | organism=Plasmodium_falciparum_3D7 | gene_product=AP2 domain transcription factor AP2-O2, putative | transcript_product=AP2 domain transcription factor AP2-O2, putative | location=Pf3D7_05_v3:700120-707256(-) | protein_length=2378 | sequence_SO=chromosome | SO=protein_coding | is_pseudo=false	23	23	23	23	23	23	23	23	23	23	23	23	276	69460.7	66079.2	59626.2	72844.4	73209.6	54859.5	60512.4	74885.9	75228.6	86285.4	60220.2	105919		67002.6	65866.8	81913.3	214783		0.81797	0.804104		0.220674	0.20402
transcript=PF3D7_0516200.1	>PF3D7_0516200.1-p1 | transcript=PF3D7_0516200.1 | gene=PF3D7_0516200 | organism=Plasmodium_falciparum_3D7 | gene_product=40S ribosomal protein S11 | transcript_product=40S ribosomal protein S11 | location=Pf3D7_05_v3:675809-676614(-) | protein_length=151 | sequence_SO=chromosome | SO=protein_coding | is_pseudo=false	17	17	17	17	17	17	17	17	17	17	17	17	204	1.08298e+06	1.0965e+06	923632	863319	1.04511e+06	966119	1.02283e+06	1.00441e+06	998657	1.06271e+06	1.0001e+06	1.01203e+06		991608	1.00962e+06	1.01838e+06	3.0196e+06		0.973715	0.991399		0.682249	0.710813
transcript=PF3D7_0516400.1	>PF3D7_0516400.1-p1 | transcript=PF3D7_0516400.1 | gene=PF3D7_0516400 | organism=Plasmodium_falciparum_3D7 | gene_product=phosducin-like protein 1, putative | transcript_product=phosducin-like protein 1, putative | location=Pf3D7_05_v3:681430-682437(-) | protein_length=335 | sequence_SO=chromosome | SO=protein_coding | is_pseudo=false	7	7	7	7	7	7	7	7	7	7	7	7	84	197549	209994	224891	231805	267597	192154	189374	208818	233392	219638	169451	234964		216060	214486	214361	644907		1.00792	1.00058		0.925519	0.996002
transcript=PF3D7_0516900.1	>PF3D7_0516900.1-p1 | transcript=PF3D7_0516900.1 | gene=PF3D7_0516900 | organism=Plasmodium_falciparum_3D7 | gene_product=60S ribosomal protein L2 | transcript_product=60S ribosomal protein L2 | location=Pf3D7_05_v3:712762-713772(-) | protein_length=260 | sequence_SO=chromosome | SO=protein_coding | is_pseudo=false	10	10	10	10	10	10	10	10	10	10	10	10	120	471233	428517	381570	244712	376502	428397	429023	431317	336956	415948	393658	373598		381508	416310	380040	1.17786e+06		1.00386	1.09544		0.978905	0.143461
transcript=PF3D7_0517000.1	>PF3D7_0517000.1-p1 | transcript=PF3D7_0517000.1 | gene=PF3D7_0517000 | organism=Plasmodium_falciparum_3D7 | gene_product=60S ribosomal protein L12, putative | transcript_product=60S ribosomal protein L12, putative | location=Pf3D7_05_v3:715765-716675(-) | protein_length=165 | sequence_SO=chromosome | SO=protein_coding | is_pseudo=false	12	12	12	12	12	12	12	12	12	12	12	12	144	2.13792e+06	2.0666e+06	1.87853e+06	1.18663e+06	2170085	2183169	2240779	2.21181e+06	1.86001e+06	1.90206e+06	1.85912e+06	2.10188e+06		1.81742e+06	2.20146e+06	1.93077e+06	5.94965e+06		0.941295	1.1402		0.644869	0.0150998
transcript=PF3D7_0517300.1	>PF3D7_0517300.1-p1 | transcript=PF3D7_0517300.1 | gene=PF3D7_0517300 | organism=Plasmodium_falciparum_3D7 | gene_product=serine/arginine-rich splicing factor 1 | transcript_product=serine/arginine-rich splicing factor 1 | location=Pf3D7_05_v3:724681-725751(-) | protein_length=298 | sequence_SO=chromosome | SO=protein_coding | is_pseudo=false	12	12	12	12	12	12	12	12	12	12	12	12	144	3.13029e+06	3.55331e+06	2.78732e+06	3.87241e+06	3.46418e+06	2960686	2.94352e+06	3.42386e+06	3.56059e+06	3.528e+06	3255609	3.26862e+06		3.33583e+06	3198059	3.4032e+06	9.9371e+06		0.980204	0.93972		0.803001	0.268915
transcript=PF3D7_0518200.1	>PF3D7_0518200.1-p1 | transcript=PF3D7_0518200.1 | gene=PF3D7_0518200 | organism=Plasmodium_falciparum_3D7 | gene_product=SWIB/MDM2 domain-containing protein | transcript_product=SWIB/MDM2 domain-containing protein | location=Pf3D7_05_v3:758503-758898(-) | protein_length=131 | sequence_SO=chromosome | SO=protein_coding | is_pseudo=false	9	9	9	9	9	9	9	9	9	9	9	9	108	81697	89481.1	29956.8	86098.9	28969.7	24476.2	69665.1	86427.2	78192.1	30293	69446.6	30368		71808.5	52384.6	52074.9	176268		1.37895	1.00595		0.337524	0.988058
transcript=PF3D7_0517400.1	>PF3D7_0517400.1-p1 | transcript=PF3D7_0517400.1 | gene=PF3D7_0517400 | organism=Plasmodium_falciparum_3D7 | gene_product=FACT complex subunit SPT16, putative | transcript_product=FACT complex subunit SPT16, putative | location=Pf3D7_05_v3:731407-735162(+) | protein_length=1141 | sequence_SO=chromosome | SO=protein_coding | is_pseudo=false	48	48	48	48	48	48	48	48	48	48	48	48	576	1.39246e+06	1.27794e+06	1.24804e+06	1.28974e+06	1118521	1.24521e+06	1.15939e+06	1.18472e+06	1.20967e+06	1.29719e+06	1.13801e+06	1.14266e+06		1.30205e+06	1.17696e+06	1.19688e+06	3.67589e+06		1.08787	0.983357		0.0754125	0.679815
transcript=PF3D7_0518500.1	>PF3D7_0518500.1-p1 | transcript=PF3D7_0518500.1 | gene=PF3D7_0518500 | organism=Plasmodium_falciparum_3D7 | gene_product=ATP-dependent RNA helicase DDX23, putative | transcript_product=ATP-dependent RNA helicase DDX23, putative | location=Pf3D7_05_v3:763532-766903(-) | protein_length=1123 | sequence_SO=chromosome | SO=protein_coding | is_pseudo=false	18	18	18	18	18	18	18	18	18	18	18	18	216	30620.9	26142.1	25158.6	21259.2	21865.1	30446	35156.3	24224.3	25463	34788.6	30254.7	38925.4		25795.2	27922.9	32357.9	86076.1		0.797183	0.86294		0.115711	0.329999
transcript=PF3D7_0517700.1	>PF3D7_0517700.1-p1 | transcript=PF3D7_0517700.1 | gene=PF3D7_0517700 | organism=Plasmodium_falciparum_3D7 | gene_product=eukaryotic translation initiation factor 3 subunit B, putative | transcript_product=eukaryotic translation initiation factor 3 subunit B, putative | location=Pf3D7_05_v3:743179-745329(+) | protein_length=716 | sequence_SO=chromosome | SO=protein_coding | is_pseudo=false	28	28	28	28	28	28	28	28	28	28	28	28	336	267542	257035	289887	230151	287517	245147	284279	265790	281910	265339	272792	279135		261154	270684	274794	806631		0.950361	0.985041		0.358433	0.714596
transcript=PF3D7_0519500.1	>PF3D7_0519500.1-p1 | transcript=PF3D7_0519500.1 | gene=PF3D7_0519500 | organism=Plasmodium_falciparum_3D7 | gene_product=CCR4 domain-containing protein 1, putative | transcript_product=CCR4 domain-containing protein 1, putative | location=Pf3D7_05_v3:801450-809127(-) | protein_length=2488 | sequence_SO=chromosome | SO=protein_coding | is_pseudo=false	10	10	10	10	10	10	10	10	10	10	10	10	120	92745.9	109611	78715.4	106262	80608.5	79636.7	87362	91268.7	131541	97287	99421.7	73450.5		96833.5	84719	100425	281977		0.964237	0.843604		0.806076	0.281729
transcript=PF3D7_0518300.1	>PF3D7_0518300.1-p1 | transcript=PF3D7_0518300.1 | gene=PF3D7_0518300 | organism=Plasmodium_falciparum_3D7 | gene_product=proteasome subunit beta type-1, putative | transcript_product=proteasome subunit beta type-1, putative | location=Pf3D7_05_v3:759831-760998(-) | protein_length=240 | sequence_SO=chromosome | SO=protein_coding | is_pseudo=false	17	17	17	17	17	17	17	17	17	17	17	17	204	2.03094e+06	2.27183e+06	2.25953e+06	2.09934e+06	1.9752e+06	1891102	1.91008e+06	2.19249e+06	2.05016e+06	1.96503e+06	1.79637e+06	1.9393e+06		2.16541e+06	1.99222e+06	1.93771e+06	6.09534e+06		1.11751	1.02813		0.0292369	0.555435
transcript=PF3D7_0519400.1	>PF3D7_0519400.1-p1 | transcript=PF3D7_0519400.1 | gene=PF3D7_0519400 | organism=Plasmodium_falciparum_3D7 | gene_product=40S ribosomal protein S24 | transcript_product=40S ribosomal protein S24 | location=Pf3D7_05_v3:798036-798775(-) | protein_length=133 | sequence_SO=chromosome | SO=protein_coding | is_pseudo=false	15	15	15	15	15	15	15	15	15	15	15	15	180	673939	498382	562388	282833	565396	620746	649635	541824	385548	523943	581212	598405		504386	594400	522277	1.62106e+06		0.965744	1.13809		0.858827	0.247426
transcript=PF3D7_0519800.1	>PF3D7_0519800.1-p1 | transcript=PF3D7_0519800.1 | gene=PF3D7_0519800 | organism=Plasmodium_falciparum_3D7 | gene_product=EELM2 domain-containing protein, putative | transcript_product=EELM2 domain-containing protein, putative | location=Pf3D7_05_v3:820719-822908(-) | protein_length=668 | sequence_SO=chromosome | SO=protein_coding | is_pseudo=false	8	8	8	8	8	8	8	8	8	8	8	8	96	30821	20164.8	24187.7	19143.6	19727.5	21503.6	23010.3	11460.8	16395.7	17631.9	20259.5	17991.9		23579.3	18925.5	18069.8	60574.6		1.3049	1.04736		0.126276	0.768893
transcript=PF3D7_0519600.1	>PF3D7_0519600.1-p1 | transcript=PF3D7_0519600.1 | gene=PF3D7_0519600 | organism=Plasmodium_falciparum_3D7 | gene_product=zinc finger protein, putative | transcript_product=zinc finger protein, putative | location=Pf3D7_05_v3:812648-814915(+) | protein_length=755 | sequence_SO=chromosome | SO=protein_coding | is_pseudo=false	8	8	8	8	8	8	8	8	8	8	8	8	96	152544	190293	155633	201655	168065	161396	161986	141429	161179	170593	161438	179342		175031	158219	168138	501388		1.041	0.941008		0.627633	0.22317
transcript=PF3D7_0520200.1	>PF3D7_0520200.1-p1 | transcript=PF3D7_0520200.1 | gene=PF3D7_0520200 | organism=Plasmodium_falciparum_3D7 | gene_product=mediator of RNA polymerase II transcription subunit 17, putative | transcript_product=mediator of RNA polymerase II transcription subunit 17, putative | location=Pf3D7_05_v3:835314-837407(-) | protein_length=697 | sequence_SO=chromosome | SO=protein_coding | is_pseudo=false	8	8	8	8	8	8	8	8	8	8	8	8	96	87507	76052.8	70550.2	32747.5	74832.9	82747.4	33987.8	85610.5	74419.9	54982.7	35484.4	92404		66714.4	69294.7	64322.8	200332		1.03718	1.0773		0.893177	0.78178
transcript=PF3D7_0520300.1	>PF3D7_0520300.1-p1 | transcript=PF3D7_0520300.1 | gene=PF3D7_0520300 | organism=Plasmodium_falciparum_3D7 | gene_product=U6 snRNA-associated Sm-like protein LSm2, putative | transcript_product=U6 snRNA-associated Sm-like protein LSm2, putative | location=Pf3D7_05_v3:838428-839083(+) | protein_length=103 | sequence_SO=chromosome | SO=protein_coding | is_pseudo=false	1	1	1	1	1	1	1	1	1	1	1	1	12	748416	657201	948406	931490	705389	915279	805483	666004	637742	627165	617243	889537		821378	773039	692922	2.28734e+06		1.18538	1.11562		0.232768	0.389195
transcript=PF3D7_0520400.1	>PF3D7_0520400.1-p1 | transcript=PF3D7_0520400.1 | gene=PF3D7_0520400 | organism=Plasmodium_falciparum_3D7 | gene_product=single-stranded DNA-binding protein, putative | transcript_product=single-stranded DNA-binding protein, putative | location=Pf3D7_05_v3:839655-840560(-) | protein_length=301 | sequence_SO=chromosome | SO=protein_coding | is_pseudo=false	6	6	6	6	6	6	6	6	6	6	6	6	72	44199.6	13492	52159.7	42366.3	50586.7	61704.7	58397.6	18817.6	19726	37765.9	46949.1	68421.9		38054.4	47376.6	43215.7	128647		0.880568	1.09628		0.709613	0.77777
transcript=PF3D7_0520600.1	>PF3D7_0520600.1-p1 | transcript=PF3D7_0520600.1 | gene=PF3D7_0520600 | organism=Plasmodium_falciparum_3D7 | gene_product=bis(5'-nucleosyl)-tetraphosphatase [asymmetrical] | transcript_product=bis(5'-nucleosyl)-tetraphosphatase [asymmetrical] | location=Pf3D7_05_v3:843586-844817(-) | protein_length=152 | sequence_SO=chromosome | SO=protein_coding | is_pseudo=false	3	3	3	3	3	3	3	3	3	3	3	3	36	36882.8	34824.8	36882.4	39085.7	31637.5	33054.8	32496.9	33594.4	33755.1	44739.7	27192.9	31939.3		36918.9	32695.9	34406.7	104022		1.07302	0.950277		0.552668	0.677357
transcript=PF3D7_0520800.1	>PF3D7_0520800.1-p1 | transcript=PF3D7_0520800.1 | gene=PF3D7_0520800 | organism=Plasmodium_falciparum_3D7 | gene_product=conserved protein, unknown function | transcript_product=conserved protein, unknown function | location=Pf3D7_05_v3:849862-856026(-) | protein_length=2054 | sequence_SO=chromosome | SO=protein_coding | is_pseudo=false	16	16	16	16	16	16	16	16	16	16	16	16	192	36844.8	52695	45815.4	56262.8	42124.5	27541.5	19738.4	41314.9	50675.9	18725.9	45771.4	34384.2		47904.5	32679.8	37389.4	117974		1.28123	0.87404		0.261026	0.618915
transcript=PF3D7_0519700.1	>PF3D7_0519700.1-p1 | transcript=PF3D7_0519700.1 | gene=PF3D7_0519700 | organism=Plasmodium_falciparum_3D7 | gene_product=FoP domain-containing protein, putative | transcript_product=FoP domain-containing protein, putative | location=Pf3D7_05_v3:817066-819139(+) | protein_length=192 | sequence_SO=chromosome | SO=protein_coding | is_pseudo=false	8	8	8	8	8	8	8	8	8	8	8	8	96	323718	351051	345046	426348	361442	369618	372507	368972	376208	387476	381403	379415		361541	368135	381125	1.1108e+06		0.948614	0.965915		0.447011	0.00814362
transcript=PF3D7_0521000.1	>PF3D7_0521000.1-p1 | transcript=PF3D7_0521000.1 | gene=PF3D7_0521000 | organism=Plasmodium_falciparum_3D7 | gene_product=conserved Plasmodium protein, unknown function | transcript_product=conserved Plasmodium protein, unknown function | location=Pf3D7_05_v3:859373-861063(-) | protein_length=518 | sequence_SO=chromosome | SO=protein_coding | is_pseudo=false	2	2	2	2	2	2	2	2	2	2	2	2	24	108143	100779	81013.6	136932	95167.2	93413.6	88876.1	11973.8	18689.9	100511	106538	91292.7		106717	72357.7	79258	258333		1.34645	0.912939		0.297691	0.818073
transcript=PF3D7_0521700.1	>PF3D7_0521700.1-p1 | transcript=PF3D7_0521700.1 | gene=PF3D7_0521700 | organism=Plasmodium_falciparum_3D7 | gene_product=ATP-dependent RNA helicase DDX1, putative | transcript_product=ATP-dependent RNA helicase DDX1, putative | location=Pf3D7_05_v3:882376-884901(+) | protein_length=841 | sequence_SO=chromosome | SO=protein_coding | is_pseudo=false	13	13	13	13	13	13	13	13	13	13	13	13	156	50525.5	89554.7	25158.8	77425.2	75356.6	67998.2	69662.8	27165.2	85706.8	74060.1	68432.2	81164.7		60666	60045.7	77340.9	198053		0.784397	0.776377		0.334645	0.219312
transcript=PF3D7_0522100.1	>PF3D7_0522100.1-p1 | transcript=PF3D7_0522100.1 | gene=PF3D7_0522100 | organism=Plasmodium_falciparum_3D7 | gene_product=conserved Plasmodium protein, unknown function | transcript_product=conserved Plasmodium protein, unknown function | location=Pf3D7_05_v3:897465-899756(-) | protein_length=763 | sequence_SO=chromosome | SO=protein_coding | is_pseudo=false	2	2	2	2	2	2	2	2	2	2	2	2	24	30876.5	29906.5	28571.8	28912.1	13024.7	34489.4	13544.2	26213.5	27479.1	18121.2	12682.6	14974.2		29566.7	21818	18314.3	69699		1.61441	1.19131		0.0388622	0.592865
transcript=PF3D7_0522200.1	>PF3D7_0522200.1-p1 | transcript=PF3D7_0522200.1 | gene=PF3D7_0522200 | organism=Plasmodium_falciparum_3D7 | gene_product=transcription initiation factor TFIID subunit 10, putative | transcript_product=transcription initiation factor TFIID subunit 10, putative | location=Pf3D7_05_v3:901414-902173(+) | protein_length=116 | sequence_SO=chromosome | SO=protein_coding | is_pseudo=false	8	8	8	8	8	8	8	8	8	8	8	8	96	34261.9	48109.2	36103.7	42508.5	33646.6	35296.6	38734.9	35181.6	36397.1	49316.2	42934.3	31447.3		40245.8	35714.9	40023.7	115984		1.00555	0.892345		0.966145	0.354457
transcript=PF3D7_0523100.1	>PF3D7_0523100.1-p1 | transcript=PF3D7_0523100.1 | gene=PF3D7_0523100 | organism=Plasmodium_falciparum_3D7 | gene_product=mitochondrial-processing peptidase subunit alpha, putative | transcript_product=mitochondrial-processing peptidase subunit alpha, putative | location=Pf3D7_05_v3:963227-965044(-) | protein_length=534 | sequence_SO=chromosome | SO=protein_coding | is_pseudo=false	18	18	18	18	18	18	18	18	18	18	18	18	216	52656.8	45619.7	23627.1	18684.4	17369.1	54629.6	25159.4	21436.4	19385.2	15592.2	17958.1	23570		35147	29648.7	19126.4	83922		1.83762	1.55015		0.146708	0.304683
transcript=PF3D7_0520000.1	>PF3D7_0520000.1-p1 | transcript=PF3D7_0520000.1 | gene=PF3D7_0520000 | organism=Plasmodium_falciparum_3D7 | gene_product=40S ribosomal protein S9, putative | transcript_product=40S ribosomal protein S9, putative | location=Pf3D7_05_v3:828953-829883(+) | protein_length=189 | sequence_SO=chromosome | SO=protein_coding | is_pseudo=false	13	13	13	13	13	13	13	13	13	13	13	13	156	1.7221e+06	1.69196e+06	1.55826e+06	949240	1.78391e+06	1.7749e+06	1.76404e+06	1791078	1.42661e+06	1.56802e+06	1.51203e+06	1.72884e+06		1.48039e+06	1.77848e+06	1.55887e+06	4.81774e+06		0.949655	1.14088		0.704329	0.0403605
transcript=PF3D7_0524300.1	>PF3D7_0524300.1-p1 | transcript=PF3D7_0524300.1 | gene=PF3D7_0524300 | organism=Plasmodium_falciparum_3D7 | gene_product=conserved Plasmodium protein, unknown function | transcript_product=conserved Plasmodium protein, unknown function | location=Pf3D7_05_v3:1010951-1012171(-) | protein_length=406 | sequence_SO=chromosome | SO=protein_coding | is_pseudo=false	5	5	5	5	5	5	5	5	5	5	5	5	60	27376.6	32322	25626.8	29905.5	30665.5	34290.5	26644.3	30715.3	29244.3	24258	26672.4	22703.5		28807.7	30578.9	25719.6	85106.2		1.12007	1.18893		0.182163	0.0619422
transcript=PF3D7_0524400.1	>PF3D7_0524400.1-p1 | transcript=PF3D7_0524400.1 | gene=PF3D7_0524400 | organism=Plasmodium_falciparum_3D7 | gene_product=ribosome-interacting GTPase 1, putative | transcript_product=ribosome-interacting GTPase 1, putative | location=Pf3D7_05_v3:1013453-1014550(-) | protein_length=365 | sequence_SO=chromosome | SO=protein_coding | is_pseudo=false	12	12	12	12	12	12	12	12	12	12	12	12	144	72018.9	74762.6	58536.5	16853.1	68057.9	86087.4	94239.4	94149.7	77264.1	73541	65474.2	67197.9		55542.8	85633.6	70869.3	212046		0.783735	1.20833		0.337626	0.0914595
transcript=PF3D7_0524500.1	>PF3D7_0524500.1-p1 | transcript=PF3D7_0524500.1 | gene=PF3D7_0524500 | organism=Plasmodium_falciparum_3D7 | gene_product=conserved Plasmodium protein, unknown function | transcript_product=conserved Plasmodium protein, unknown function | location=Pf3D7_05_v3:1016198-1016569(+) | protein_length=123 | sequence_SO=chromosome | SO=protein_coding | is_pseudo=false	5	5	5	5	5	5	5	5	5	5	5	5	60	94325.9	104502	85934.8	115945	97409.9	77177.8	90625.6	104962	102708	100345	101354	48983.4		100177	92543.9	88347.6	281068		1.13389	1.0475		0.460792	0.784608
transcript=PF3D7_0524600.1	>PF3D7_0524600.1-p1 | transcript=PF3D7_0524600.1 | gene=PF3D7_0524600 | organism=Plasmodium_falciparum_3D7 | gene_product=50S ribosomal protein L12, apicoplast, putative | transcript_product=50S ribosomal protein L12, apicoplast, putative | location=Pf3D7_05_v3:1017809-1018582(+) | protein_length=257 | sequence_SO=chromosome | SO=protein_coding | is_pseudo=false	6	6	6	6	6	6	6	6	6	6	6	6	72	81633.6	78772.3	66539.6	83934.4	74366.3	60778.2	73671.8	82971.4	69417.1	86460.9	77821.1	71518.5		77720	72946.9	76304.4	226971		1.01855	0.955999		0.803591	0.594503
transcript=PF3D7_0520900.1	>PF3D7_0520900.1-p1 | transcript=PF3D7_0520900.1 | gene=PF3D7_0520900 | organism=Plasmodium_falciparum_3D7 | gene_product=adenosylhomocysteinase | transcript_product=adenosylhomocysteinase | location=Pf3D7_05_v3:857038-858477(+) | protein_length=479 | sequence_SO=chromosome | SO=protein_coding | is_pseudo=false	43	43	43	43	43	43	43	43	43	43	43	43	516	1.79515e+06	1.98991e+06	1.69994e+06	1.76688e+06	1715068	1.68744e+06	1.64504e+06	1.89807e+06	1.97907e+06	1.86185e+06	1.70932e+06	1649123		1.81297e+06	1736404	1.79984e+06	5.34922e+06		1.00729	0.964753		0.897128	0.523384
transcript=PF3D7_0524000.1	>PF3D7_0524000.1-p1 | transcript=PF3D7_0524000.1 | gene=PF3D7_0524000 | organism=Plasmodium_falciparum_3D7 | gene_product=karyopherin beta | transcript_product=karyopherin beta | location=Pf3D7_05_v3:998753-1002124(+) | protein_length=1123 | sequence_SO=chromosome | SO=protein_coding | is_pseudo=false	69	69	69	69	69	69	69	69	69	69	69	69	828	4512140	4.48591e+06	4.26103e+06	4.84509e+06	4.05788e+06	3769325	4.0687e+06	4.22028e+06	4357474	4.29811e+06	4588859	4.46323e+06		4.52604e+06	4029046	4.42692e+06	1.2982e+07		1.02239	0.910124		0.502489	0.0158797
transcript=PF3D7_0526200.1;transcript=PF3D7_0526200.2	>PF3D7_0526200.1-p1 | transcript=PF3D7_0526200.1 | gene=PF3D7_0526200 | organism=Plasmodium_falciparum_3D7 | gene_product=ADP-ribosylation factor GTPase-activating protein, putative | transcript_product=ADP-ribosylation factor GTPase-activating protein, putative | location=Pf3D7_05_v3:1081558-1083816(-) | protein_length=506 | sequence_SO=chromosome | SO=protein_coding | is_pseudo=false;>PF3D7_052…	12	12	12	12	12	12	12	12	12	12	12	12	144	29685.9	54759.4	32520.3	61974.8	49485.5	33556.8	28612.8	54858.5	37085.8	31558.5	48224.9	31278.6		44735.1	41628.4	37036.9	123400		1.20785	1.12397		0.434373	0.562518
transcript=PF3D7_0526500.1	>PF3D7_0526500.1-p1 | transcript=PF3D7_0526500.1 | gene=PF3D7_0526500 | organism=Plasmodium_falciparum_3D7 | gene_product=conserved Plasmodium protein, unknown function | transcript_product=conserved Plasmodium protein, unknown function | location=Pf3D7_05_v3:1090930-1095084(+) | protein_length=1384 | sequence_SO=chromosome | SO=protein_coding | is_pseudo=false	12	12	12	12	12	12	12	12	12	12	12	12	144	36881.9	57189.1	57335.8	38389.3	32135.5	51658.3	50170.7	31313.2	51839.2	45447.2	41651.2	40194.4		47449	41319.4	44783	133551		1.05953	0.922659		0.690229	0.600477
transcript=PF3D7_0525100.1	>PF3D7_0525100.1-p1 | transcript=PF3D7_0525100.1 | gene=PF3D7_0525100 | organism=Plasmodium_falciparum_3D7 | gene_product=acyl-CoA synthetase | transcript_product=acyl-CoA synthetase | location=Pf3D7_05_v3:1041745-1043766(+) | protein_length=673 | sequence_SO=chromosome | SO=protein_coding | is_pseudo=false	33	33	33	33	33	33	33	33	33	33	33	33	396	747733	679971	707984	602636	680181	788543	788519	735874	662001	723681	734371	790276		684581	748279	727582	2.16044e+06		0.940898	1.02845		0.328765	0.59502
transcript=PF3D7_0525800.1	>PF3D7_0525800.1-p1 | transcript=PF3D7_0525800.1 | gene=PF3D7_0525800 | organism=Plasmodium_falciparum_3D7 | gene_product=inner membrane complex protein 1g, putative | transcript_product=inner membrane complex protein 1g, putative | location=Pf3D7_05_v3:1071247-1072149(+) | protein_length=300 | sequence_SO=chromosome | SO=protein_coding | is_pseudo=false	19	19	19	19	19	19	19	19	19	19	19	19	228	691733	753115	698865	937793	647755	626108	625135	692518	763455	779896	744413	710953		770376	647879	749680	2.16793e+06		1.02761	0.864208		0.747774	0.00333856
transcript=PF3D7_0527000.1	>PF3D7_0527000.1-p1 | transcript=PF3D7_0527000.1 | gene=PF3D7_0527000 | organism=Plasmodium_falciparum_3D7 | gene_product=DNA replication licensing factor MCM3, putative | transcript_product=DNA replication licensing factor MCM3, putative | location=Pf3D7_05_v3:1125099-1128146(-) | protein_length=962 | sequence_SO=chromosome | SO=protein_coding | is_pseudo=false	50	50	50	50	50	50	50	50	50	50	50	50	600	401239	469321	425344	468356	415342	450813	449245	476784	446695	465444	462426	517711		441065	448046	473069	1.36218e+06		0.932347	0.947104		0.210261	0.257653
transcript=PF3D7_0527600.1	>PF3D7_0527600.1-p1 | transcript=PF3D7_0527600.1 | gene=PF3D7_0527600 | organism=Plasmodium_falciparum_3D7 | gene_product=conserved Plasmodium protein, unknown function | transcript_product=conserved Plasmodium protein, unknown function | location=Pf3D7_05_v3:1145857-1148810(-) | protein_length=455 | sequence_SO=chromosome | SO=protein_coding | is_pseudo=false	10	10	10	10	10	10	10	10	10	10	10	10	120	85066.4	80565.1	73076.5	83442	86016.1	70575.1	78525.2	73317.8	90392.4	78873.5	81624.5	85607.4		80537.5	77108.5	84124.4	241770		0.957362	0.916601		0.363891	0.151779
transcript=PF3D7_0527900.1	>PF3D7_0527900.1-p1 | transcript=PF3D7_0527900.1 | gene=PF3D7_0527900 | organism=Plasmodium_falciparum_3D7 | gene_product=ATP-dependent RNA helicase DDX41, putative | transcript_product=ATP-dependent RNA helicase DDX41, putative | location=Pf3D7_05_v3:1153676-1155673(+) | protein_length=665 | sequence_SO=chromosome | SO=protein_coding | is_pseudo=false	11	11	11	11	11	11	11	11	11	11	11	11	132	7935.5	4654.88	13091.3	6308.96	6719.2	6346.5	6476.68	21728.8	27004.8	6847.6	9400.31	13417.8		7997.65	10317.8	14167.6	32483.1		0.564501	0.728264		0.272332	0.537756
transcript=PF3D7_0528000.1	>PF3D7_0528000.1-p1 | transcript=PF3D7_0528000.1 | gene=PF3D7_0528000 | organism=Plasmodium_falciparum_3D7 | gene_product=proteasome maturation factor UMP1, putative | transcript_product=proteasome maturation factor UMP1, putative | location=Pf3D7_05_v3:1156205-1156579(-) | protein_length=124 | sequence_SO=chromosome | SO=protein_coding | is_pseudo=false	4	4	4	4	4	4	4	4	4	4	4	4	48	95750.3	123932	107602	91100.3	95709.9	79469.9	86595.1	107027	97418.6	115641	79851.6	86857.9		104596	92200.5	94942.2	291739		1.10168	0.971123		0.401343	0.789749
transcript=PF3D7_0527200.1	>PF3D7_0527200.1-p1 | transcript=PF3D7_0527200.1 | gene=PF3D7_0527200 | organism=Plasmodium_falciparum_3D7 | gene_product=ubiquitin carboxyl-terminal hydrolase 14 | transcript_product=ubiquitin carboxyl-terminal hydrolase 14 | location=Pf3D7_05_v3:1132937-1134854(-) | protein_length=605 | sequence_SO=chromosome | SO=protein_coding | is_pseudo=false	18	18	18	18	18	18	18	18	18	18	18	18	216	251425	241769	227558	249559	256157	251941	261139	248705	258532	239151	266289	267046		242578	254486	257754	754818		0.941119	0.987318		0.124587	0.666063
transcript=PF3D7_0527500.1	>PF3D7_0527500.1-p1 | transcript=PF3D7_0527500.1 | gene=PF3D7_0527500 | organism=Plasmodium_falciparum_3D7 | gene_product=Hsc70-interacting protein | transcript_product=Hsc70-interacting protein | location=Pf3D7_05_v3:1143618-1145359(+) | protein_length=458 | sequence_SO=chromosome | SO=protein_coding | is_pseudo=false	18	18	18	18	18	18	18	18	18	18	18	18	216	2519756	2995452	2.2521e+06	3.00421e+06	2608340	2.06844e+06	2.33748e+06	2.67745e+06	2.90038e+06	2.63353e+06	2.51278e+06	2.39319e+06		2.69288e+06	2.42293e+06	2609968	7.72578e+06		1.03177	0.928337		0.715979	0.332132
transcript=PF3D7_0528700.1	>PF3D7_0528700.1-p1 | transcript=PF3D7_0528700.1 | gene=PF3D7_0528700 | organism=Plasmodium_falciparum_3D7 | gene_product=peptidyl-prolyl cis-trans isomerase | transcript_product=peptidyl-prolyl cis-trans isomerase | location=Pf3D7_05_v3:1178276-1178890(-) | protein_length=204 | sequence_SO=chromosome | SO=protein_coding | is_pseudo=false	3	3	3	3	3	3	3	3	3	3	3	3	36	110821	94470.8	101716	99033.1	97400.1	103824	110350	107628	16164.4	91323.6	91709.1	118485		101510	104800	79420.5	285731		1.27814	1.31956		0.39165	0.333563
transcript=PF3D7_0528100.1	>PF3D7_0528100.1-p1 | transcript=PF3D7_0528100.1 | gene=PF3D7_0528100 | organism=Plasmodium_falciparum_3D7 | gene_product=AP-1 complex subunit beta, putative | transcript_product=AP-1 complex subunit beta, putative | location=Pf3D7_05_v3:1157840-1161553(-) | protein_length=929 | sequence_SO=chromosome | SO=protein_coding | is_pseudo=false	27	27	27	27	27	27	27	27	27	27	27	27	324	199817	170772	243046	193160	192299	218560	229336	174664	172286	160474	178843	191805		201699	203715	175852	581265		1.14698	1.15844		0.190212	0.109609
transcript=PF3D7_0528200.1	>PF3D7_0528200.1-p1 | transcript=PF3D7_0528200.1 | gene=PF3D7_0528200 | organism=Plasmodium_falciparum_3D7 | gene_product=eukaryotic translation initiation factor 3 subunit E, putative | transcript_product=eukaryotic translation initiation factor 3 subunit E, putative | location=Pf3D7_05_v3:1163408-1165072(-) | protein_length=517 | sequence_SO=chromosome | SO=protein_coding | is_pseudo=false	19	19	19	19	19	19	19	19	19	19	19	19	228	1.06177e+06	1.14478e+06	987562	1.02168e+06	920722	1.04095e+06	952297	1.0421e+06	1.09744e+06	1.0727e+06	1.0026e+06	1.12385e+06		1.05395e+06	989019	1.07415e+06	3.11712e+06		0.981194	0.920746		0.654038	0.0815114
transcript=PF3D7_0529500.1	>PF3D7_0529500.1-p1 | transcript=PF3D7_0529500.1 | gene=PF3D7_0529500 | organism=Plasmodium_falciparum_3D7 | gene_product=cell cycle regulator protein, putative | transcript_product=cell cycle regulator protein, putative | location=Pf3D7_05_v3:1206473-1207679(+) | protein_length=179 | sequence_SO=chromosome | SO=protein_coding | is_pseudo=false	5	5	5	5	5	5	5	5	5	5	5	5	60	90559.2	136873	134773	16550.4	121465	81843.7	27534.8	110609	123913	112028	22155.5	22475.5		94689	85363.2	70142.9	250195		1.34994	1.21699		0.557252	0.678079
transcript=PF3D7_0529800.1	>PF3D7_0529800.1-p1 | transcript=PF3D7_0529800.1 | gene=PF3D7_0529800 | organism=Plasmodium_falciparum_3D7 | gene_product=conserved Plasmodium protein, unknown function | transcript_product=conserved Plasmodium protein, unknown function | location=Pf3D7_05_v3:1213533-1219376(+) | protein_length=1906 | sequence_SO=chromosome | SO=protein_coding | is_pseudo=false	23	23	23	23	23	23	23	23	23	23	23	23	276	47608.3	71922.8	53264.5	34343.1	43925.6	30506.5	36481.5	28354.8	48990.8	58502.3	39575	57315.3		51784.7	34817.1	51095.8	137698		1.01348	0.681408		0.941767	0.0287369
transcript=PF3D7_0528800.1	>PF3D7_0528800.1-p1 | transcript=PF3D7_0528800.1 | gene=PF3D7_0528800 | organism=Plasmodium_falciparum_3D7 | gene_product=nucleolar preribosomal GTPase, putative | transcript_product=nucleolar preribosomal GTPase, putative | location=Pf3D7_05_v3:1180425-1182038(-) | protein_length=537 | sequence_SO=chromosome | SO=protein_coding | is_pseudo=false	5	5	5	5	5	5	5	5	5	5	5	5	60	3.62023e+06	4193608	3766845	3.82736e+06	3.3085e+06	3.35899e+06	2.91331e+06	3591481	3552551	3.46319e+06	3787885	3.21568e+06		3.85201e+06	3.29307e+06	3.50483e+06	1.06499e+07		1.09906	0.939581		0.0869346	0.294455
transcript=PF3D7_0529400.1	>PF3D7_0529400.1-p1 | transcript=PF3D7_0529400.1 | gene=PF3D7_0529400 | organism=Plasmodium_falciparum_3D7 | gene_product=conserved Plasmodium protein, unknown function | transcript_product=conserved Plasmodium protein, unknown function | location=Pf3D7_05_v3:1199165-1205187(+) | protein_length=1582 | sequence_SO=chromosome | SO=protein_coding | is_pseudo=false	58	58	58	58	58	58	58	58	58	58	58	58	696	237885	270244	244210	279658	237240	250734	240083	234223	272371	236676	236899	248054		257999	240570	248500	747069		1.03823	0.968089		0.496404	0.433162
transcript=PF3D7_0532100.1	>PF3D7_0532100.1-p1 | transcript=PF3D7_0532100.1 | gene=PF3D7_0532100 | organism=Plasmodium_falciparum_3D7 | gene_product=early transcribed membrane protein 5 | transcript_product=early transcribed membrane protein 5 | location=Pf3D7_05_v3:1301224-1301769(+) | protein_length=181 | sequence_SO=chromosome | SO=protein_coding | is_pseudo=false	6	6	6	6	6	6	6	6	6	6	6	6	72	1159673	1.2711e+06	1574293	1.83774e+06	1.49329e+06	1.48086e+06	1.34781e+06	1.24463e+06	1.14111e+06	1.39471e+06	1.28367e+06	1.56488e+06		1.4607e+06	1.39165e+06	1.34609e+06	4.19844e+06		1.08514	1.03384		0.547716	0.687971
transcript=PF3D7_0601900.1	>PF3D7_0601900.1-p1 | transcript=PF3D7_0601900.1 | gene=PF3D7_0601900 | organism=Plasmodium_falciparum_3D7 | gene_product=conserved Plasmodium protein, unknown function | transcript_product=conserved Plasmodium protein, unknown function | location=Pf3D7_06_v3:78190-78784(+) | protein_length=128 | sequence_SO=chromosome | SO=protein_coding | is_pseudo=false	3	3	3	3	3	3	3	3	3	3	3	3	36	41080.4	34300.8	37551.4	30419.9	36397.4	30576.5	33104.2	46248.3	45878.7	47623.9	42115.5	22639.3		35838.1	36581.6	39564.4	111984		0.905818	0.92461		0.580366	0.675384
transcript=PF3D7_0532300.1	>PF3D7_0532300.1-p1 | transcript=PF3D7_0532300.1 | gene=PF3D7_0532300 | organism=Plasmodium_falciparum_3D7 | gene_product=Plasmodium exported protein (PHISTb), unknown function | transcript_product=Plasmodium exported protein (PHISTb), unknown function | location=Pf3D7_05_v3:1308278-1309940(+) | protein_length=509 | sequence_SO=chromosome | SO=protein_coding | is_pseudo=false	18	18	18	18	18	18	18	18	18	18	18	18	216	1.04954e+06	1.17955e+06	1.05877e+06	1.23565e+06	1.14224e+06	1.0062e+06	1.13564e+06	1.14024e+06	1.20801e+06	1120251	1.08834e+06	1161555		1.13088e+06	1.10608e+06	1.14454e+06	3.38149e+06		0.988062	0.966397		0.806023	0.399475
transcript=PF3D7_0532400.1	>PF3D7_0532400.1-p1 | transcript=PF3D7_0532400.1 | gene=PF3D7_0532400 | organism=Plasmodium_falciparum_3D7 | gene_product=lysine-rich membrane-associated PHISTb protein | transcript_product=lysine-rich membrane-associated PHISTb protein | location=Pf3D7_05_v3:1312471-1314154(+) | protein_length=528 | sequence_SO=chromosome | SO=protein_coding | is_pseudo=false	17	17	17	17	17	17	17	17	17	17	17	17	204	235708	208008	206169	246916	231480	161243	203684	251730	232905	261405	234978	125716		224200	212034	213751	649985		1.04888	0.991968		0.759754	0.963624
transcript=PF3D7_0602200.1	>PF3D7_0602200.1-p1 | transcript=PF3D7_0602200.1 | gene=PF3D7_0602200 | organism=Plasmodium_falciparum_3D7 | gene_product=MYND-type zinc finger protein, putative | transcript_product=MYND-type zinc finger protein, putative | location=Pf3D7_06_v3:97890-98951(+) | protein_length=252 | sequence_SO=chromosome | SO=protein_coding | is_pseudo=false	8	8	8	8	8	8	8	8	8	8	8	8	96	145220	170675	165194	114628	71981.6	115296	72727	56627.7	175957	163905	62692.9	82437.2		148929	79158	121248	349335		1.2283	0.65286		0.423375	0.246079
transcript=PF3D7_0604100.1	>PF3D7_0604100.1-p1 | transcript=PF3D7_0604100.1 | gene=PF3D7_0604100 | organism=Plasmodium_falciparum_3D7 | gene_product=AP2 domain transcription factor | transcript_product=AP2 domain transcription factor | location=Pf3D7_06_v3:171301-177240(-) | protein_length=1979 | sequence_SO=chromosome | SO=protein_coding | is_pseudo=false	35	35	35	35	35	35	35	35	35	35	35	35	420	71321.4	86642.9	70145.3	89730.6	72678.5	67751.5	67175.9	64107.4	92643.9	79478.4	63311.5	75330.4		79460.1	67928.3	77691.1	225079		1.02277	0.874339		0.830493	0.206039
transcript=PF3D7_0604300.1	>PF3D7_0604300.1-p1 | transcript=PF3D7_0604300.1 | gene=PF3D7_0604300 | organism=Plasmodium_falciparum_3D7 | gene_product=conserved Plasmodium protein, unknown function | transcript_product=conserved Plasmodium protein, unknown function | location=Pf3D7_06_v3:182216-184537(+) | protein_length=773 | sequence_SO=chromosome | SO=protein_coding | is_pseudo=false	3	3	3	3	3	3	3	3	3	3	3	3	36	24703.9	4968.96	97268.8	14776.9	14582.3	16349.5	9257.02	13308.9	12457.3	8984.09	9531.73	9367.26		35429.6	13374.4	10085.1	58889.2		3.51307	1.32616		0.314084	0.117295
transcript=PF3D7_0602400.1	>PF3D7_0602400.1-p1 | transcript=PF3D7_0602400.1 | gene=PF3D7_0602400 | organism=Plasmodium_falciparum_3D7 | gene_product=elongation factor G | transcript_product=elongation factor G | location=Pf3D7_06_v3:101385-104561(-) | protein_length=937 | sequence_SO=chromosome | SO=protein_coding | is_pseudo=false	8	8	8	8	8	8	8	8	8	8	8	8	96	430959	279005	337687	264732	405343	430895	438095	424020	302666	445822	401893	417320		328096	424588	391925	1.14461e+06		0.837139	1.08334		0.241403	0.37484
transcript=PF3D7_0603400.1	>PF3D7_0603400.1-p1 | transcript=PF3D7_0603400.1 | gene=PF3D7_0603400 | organism=Plasmodium_falciparum_3D7 | gene_product=trophozoite exported protein 1 | transcript_product=trophozoite exported protein 1 | location=Pf3D7_06_v3:133150-136461(-) | protein_length=1103 | sequence_SO=chromosome | SO=protein_coding | is_pseudo=false	25	25	25	25	25	25	25	25	25	25	25	25	300	204188	232239	202077	232778	204149	204057	195138	205876	197897	203569	211067	229962		217821	202305	210624	630749		1.03417	0.960504		0.537966	0.328128
transcript=PF3D7_0604500.1	>PF3D7_0604500.1-p1 | transcript=PF3D7_0604500.1 | gene=PF3D7_0604500 | organism=Plasmodium_falciparum_3D7 | gene_product=conserved Plasmodium protein, unknown function | transcript_product=conserved Plasmodium protein, unknown function | location=Pf3D7_06_v3:189012-198078(+) | protein_length=2874 | sequence_SO=chromosome | SO=protein_coding | is_pseudo=false	101	101	101	101	101	101	101	101	101	101	101	101	1212	914656	1.21171e+06	927293	1.36526e+06	1.08523e+06	949460	972064	1.09306e+06	1.25552e+06	1.0342e+06	951289	909875		1.10473e+06	1.02495e+06	1.03772e+06	3.16741e+06		1.06457	0.987693		0.638977	0.888152
transcript=PF3D7_0606100.1	>PF3D7_0606100.1-p1 | transcript=PF3D7_0606100.1 | gene=PF3D7_0606100 | organism=Plasmodium_falciparum_3D7 | gene_product=RNA-binding protein, putative | transcript_product=RNA-binding protein, putative | location=Pf3D7_06_v3:257604-259974(+) | protein_length=582 | sequence_SO=chromosome | SO=protein_coding | is_pseudo=false	8	8	8	8	8	8	8	8	8	8	8	8	96	49815.6	72341.4	110975	150961	128617	111968	92800.6	106286	70236.7	80998	15616.2	76799.7		96023.3	109918	60912.7	266854		1.57641	1.80452		0.246654	0.0404697
transcript=PF3D7_0605100.1	>PF3D7_0605100.1-p1 | transcript=PF3D7_0605100.1 | gene=PF3D7_0605100 | organism=Plasmodium_falciparum_3D7 | gene_product=RNA-binding protein, putative | transcript_product=RNA-binding protein, putative | location=Pf3D7_06_v3:217240-219507(+) | protein_length=755 | sequence_SO=chromosome | SO=protein_coding | is_pseudo=false	23	23	23	23	23	23	23	23	23	23	23	23	276	1434910	1.46902e+06	1.54302e+06	1.71182e+06	1.33348e+06	1.28756e+06	1340777	1.50457e+06	1489083	1.4327e+06	1.42608e+06	1.62431e+06		1.53969e+06	1.3666e+06	1.49304e+06	4.39933e+06		1.03124	0.915309		0.568122	0.104287
transcript=PF3D7_0606000.1	>PF3D7_0606000.1-p1 | transcript=PF3D7_0606000.1 | gene=PF3D7_0606000 | organism=Plasmodium_falciparum_3D7 | gene_product=conserved Plasmodium protein, unknown function | transcript_product=conserved Plasmodium protein, unknown function | location=Pf3D7_06_v3:250612-253803(-) | protein_length=1063 | sequence_SO=chromosome | SO=protein_coding | is_pseudo=false	36	36	36	36	36	36	36	36	36	36	36	36	432	169819	192088	188361	226764	200777	160601	170909	171449	198235	194818	193163	189509		194258	175934	193931	564123		1.00169	0.907198		0.979916	0.127095
transcript=PF3D7_0606800.1	>PF3D7_0606800.1-p1 | transcript=PF3D7_0606800.1 | gene=PF3D7_0606800 | organism=Plasmodium_falciparum_3D7 | gene_product=VFT protein | transcript_product=VFT protein | location=Pf3D7_06_v3:288377-289276(-) | protein_length=299 | sequence_SO=chromosome | SO=protein_coding | is_pseudo=false	11	11	11	11	11	11	11	11	11	11	11	11	132	24689	28935.1	24663.4	21532.5	25489.8	14971	26991.7	20625.4	27234.8	29555.2	29014.8	26644.4		24955	22019.5	28112.3	75086.8		0.887689	0.783268		0.128415	0.107501
transcript=PF3D7_0606900.1	>PF3D7_0606900.1-p1 | transcript=PF3D7_0606900.1 | gene=PF3D7_0606900 | organism=Plasmodium_falciparum_3D7 | gene_product=glutaredoxin-like protein | transcript_product=glutaredoxin-like protein | location=Pf3D7_06_v3:290426-291085(-) | protein_length=219 | sequence_SO=chromosome | SO=protein_coding | is_pseudo=false	8	8	8	8	8	8	8	8	8	8	8	8	96	64595.9	72608	73762.9	77977	67048.1	70577.1	65342.6	74809.1	62947	57573	49665.4	63876.3		72235.9	69444.2	58515.4	200196		1.23448	1.18677		0.0193384	0.0361727
transcript=PF3D7_0606600.1	>PF3D7_0606600.1-p1 | transcript=PF3D7_0606600.1 | gene=PF3D7_0606600 | organism=Plasmodium_falciparum_3D7 | gene_product=conserved Plasmodium protein, unknown function | transcript_product=conserved Plasmodium protein, unknown function | location=Pf3D7_06_v3:270332-277762(-) | protein_length=2414 | sequence_SO=chromosome | SO=protein_coding | is_pseudo=false	34	34	34	34	34	34	34	34	34	34	34	34	408	226263	260165	209937	144935	226750	137809	203511	222449	227119	237493	90291.6	213229		210325	197630	192033	599988		1.09526	1.02914		0.679673	0.894214
transcript=PF3D7_0606700.1	>PF3D7_0606700.1-p1 | transcript=PF3D7_0606700.1 | gene=PF3D7_0606700 | organism=Plasmodium_falciparum_3D7 | gene_product=coatomer alpha subunit, putative | transcript_product=coatomer alpha subunit, putative | location=Pf3D7_06_v3:282049-287017(+) | protein_length=1512 | sequence_SO=chromosome | SO=protein_coding | is_pseudo=false	39	39	39	39	39	39	39	39	39	39	39	39	468	320339	330761	260485	286523	286664	258697	280861	301127	301344	319477	278384	262470		299527	281837	290419	871783		1.03136	0.970451		0.67174	0.598216
transcript=PF3D7_0607700.1	>PF3D7_0607700.1-p1 | transcript=PF3D7_0607700.1 | gene=PF3D7_0607700 | organism=Plasmodium_falciparum_3D7 | gene_product=conserved Plasmodium protein, unknown function | transcript_product=conserved Plasmodium protein, unknown function | location=Pf3D7_06_v3:320740-328998(+) | protein_length=2752 | sequence_SO=chromosome | SO=protein_coding | is_pseudo=false	20	20	20	20	20	20	20	20	20	20	20	20	240	54800.2	58428.7	28837	19038.5	66384	31110.1	51388.1	49551.1	40801.8	47753.1	19602.8	48120.2		40276.1	49608.3	39069.5	128954		1.03088	1.26975		0.922067	0.326351
transcript=PF3D7_0607000.1	>PF3D7_0607000.1-p1 | transcript=PF3D7_0607000.1 | gene=PF3D7_0607000 | organism=Plasmodium_falciparum_3D7 | gene_product=translation initiation factor IF-2, putative | transcript_product=translation initiation factor IF-2, putative | location=Pf3D7_06_v3:293864-296797(+) | protein_length=977 | sequence_SO=chromosome | SO=protein_coding | is_pseudo=false	37	37	37	37	37	37	37	37	37	37	37	37	444	448080	471795	405302	502190	459895	403447	435019	436993	420971	433627	448589	444929		456841	433839	437029	1.32771e+06		1.04533	0.9927		0.412392	0.818946
transcript=PF3D7_0607600.1	>PF3D7_0607600.1-p1 | transcript=PF3D7_0607600.1 | gene=PF3D7_0607600 | organism=Plasmodium_falciparum_3D7 | gene_product=spindle assembly abnormal protein 6, putative | transcript_product=spindle assembly abnormal protein 6, putative | location=Pf3D7_06_v3:313856-316882(-) | protein_length=861 | sequence_SO=chromosome | SO=protein_coding | is_pseudo=false	22	22	22	22	22	22	22	22	22	22	22	22	264	153028	173827	142406	177168	156526	137405	135740	145621	184108	16525.9	145150	154504		161607	143823	125072	430502		1.29211	1.14992		0.401835	0.649788
transcript=PF3D7_0608500.1	>PF3D7_0608500.1-p1 | transcript=PF3D7_0608500.1 | gene=PF3D7_0608500 | organism=Plasmodium_falciparum_3D7 | gene_product=proteasome subunit alpha type-2, putative | transcript_product=proteasome subunit alpha type-2, putative | location=Pf3D7_06_v3:351780-352775(-) | protein_length=235 | sequence_SO=chromosome | SO=protein_coding | is_pseudo=false	14	14	14	14	14	14	14	14	14	14	14	14	168	1.97155e+06	1.96532e+06	2.03179e+06	1.90194e+06	1.97899e+06	2.08801e+06	2.01746e+06	2.00528e+06	1.85051e+06	1.6408e+06	2.02434e+06	1.96946e+06		1.96765e+06	2.02244e+06	1.87128e+06	5.86137e+06		1.0515	1.08078		0.346407	0.172667
transcript=PF3D7_0609000.1	>PF3D7_0609000.1-p1 | transcript=PF3D7_0609000.1 | gene=PF3D7_0609000 | organism=Plasmodium_falciparum_3D7 | gene_product=nucleoporin NUP637, putative | transcript_product=nucleoporin NUP637, putative | location=Pf3D7_06_v3:370261-388494(+) | protein_length=6077 | sequence_SO=chromosome | SO=protein_coding | is_pseudo=false	48	48	48	48	48	48	48	48	48	48	48	48	576	36326.4	35206.5	33383.1	35386.4	26341.1	33569.8	32405.9	38554.4	39794.7	29307.9	31032.5	41483.8		35075.6	32717.8	35404.7	103198		0.990704	0.924109		0.922261	0.523559
transcript=PF3D7_0608700.1	>PF3D7_0608700.1-p1 | transcript=PF3D7_0608700.1 | gene=PF3D7_0608700 | organism=Plasmodium_falciparum_3D7 | gene_product=T-complex protein 1 subunit zeta | transcript_product=T-complex protein 1 subunit zeta | location=Pf3D7_06_v3:358391-360203(+) | protein_length=543 | sequence_SO=chromosome | SO=protein_coding | is_pseudo=false	28	28	28	28	28	28	28	28	28	28	28	28	336	509216	478014	432420	351628	479961	488666	453904	425516	406222	471104	451048	522970		442820	462011	462836	1.36767e+06		0.956753	0.998218		0.651816	0.977738
transcript=PF3D7_0608800.1	>PF3D7_0608800.1-p1 | transcript=PF3D7_0608800.1 | gene=PF3D7_0608800 | organism=Plasmodium_falciparum_3D7 | gene_product=ornithine aminotransferase | transcript_product=ornithine aminotransferase | location=Pf3D7_06_v3:362635-363879(+) | protein_length=414 | sequence_SO=chromosome | SO=protein_coding | is_pseudo=false	40	40	40	40	40	40	40	40	40	40	40	40	480	5946134	6059906	5945587	5220650	5507147	5.78016e+06	5.85863e+06	5148205	5418093	5.58881e+06	4959865	5891969		5.79307e+06	5.57353e+06	5.46468e+06	1.68313e+07		1.06009	1.01992		0.275832	0.681836
transcript=PF3D7_0610200.1	>PF3D7_0610200.1-p1 | transcript=PF3D7_0610200.1 | gene=PF3D7_0610200 | organism=Plasmodium_falciparum_3D7 | gene_product=RNA-binding protein 25, putative | transcript_product=RNA-binding protein 25, putative | location=Pf3D7_06_v3:437663-440545(-) | protein_length=960 | sequence_SO=chromosome | SO=protein_coding | is_pseudo=false	18	18	18	18	18	18	18	18	18	18	18	18	216	100155	113372	122441	149072	105842	95981.3	100170	104589	112055	102841	99503.9	115200		121260	101646	107400	330305		1.12905	0.946423		0.279621	0.243082
transcript=PF3D7_0610400.1	>PF3D7_0610400.1-p1 | transcript=PF3D7_0610400.1 | gene=PF3D7_0610400 | organism=Plasmodium_falciparum_3D7 | gene_product=histone H3 | transcript_product=histone H3 | location=Pf3D7_06_v3:444747-445157(+) | protein_length=136 | sequence_SO=chromosome | SO=protein_coding | is_pseudo=false	6	6	6	6	6	6	6	6	6	6	6	6	72	1051952	1.33592e+06	1.0168e+06	1.24695e+06	1.0858e+06	869939	982445	1.30554e+06	1.09069e+06	1.07403e+06	1.15911e+06	751586		1.16291e+06	1.06093e+06	1.01885e+06	3.24269e+06		1.14139	1.0413		0.272857	0.756943
transcript=PF3D7_0610800.1	>PF3D7_0610800.1-p1 | transcript=PF3D7_0610800.1 | gene=PF3D7_0610800 | organism=Plasmodium_falciparum_3D7 | gene_product=transketolase | transcript_product=transketolase | location=Pf3D7_06_v3:453671-455689(+) | protein_length=672 | sequence_SO=chromosome | SO=protein_coding | is_pseudo=false	25	25	25	25	25	25	25	25	25	25	25	25	300	350870	345548	326933	245007	358969	386406	382536	349008	311589	308726	373447	392523		317089	369229	346571	1.03289e+06		0.914933	1.06538		0.400953	0.384058
transcript=PF3D7_0611600.1	>PF3D7_0611600.1-p1 | transcript=PF3D7_0611600.1 | gene=PF3D7_0611600 | organism=Plasmodium_falciparum_3D7 | gene_product=basal complex transmembrane protein 1 | transcript_product=basal complex transmembrane protein 1 | location=Pf3D7_06_v3:485114-487066(-) | protein_length=650 | sequence_SO=chromosome | SO=protein_coding | is_pseudo=false	14	14	14	14	14	14	14	14	14	14	14	14	168	73258.7	103989	104322	66264	29930.5	46124.4	44684.5	46510.1	45951.1	96120.2	90379.5	50523.7		86958.3	41812.4	70743.6	199514		1.2292	0.591041		0.365691	0.110513
transcript=PF3D7_0611800.1	>PF3D7_0611800.1-p1 | transcript=PF3D7_0611800.1 | gene=PF3D7_0611800 | organism=Plasmodium_falciparum_3D7 | gene_product=conserved Plasmodium protein, unknown function | transcript_product=conserved Plasmodium protein, unknown function | location=Pf3D7_06_v3:490858-501140(-) | protein_length=3248 | sequence_SO=chromosome | SO=protein_coding | is_pseudo=false	29	29	29	29	29	29	29	29	29	29	29	29	348	59343.3	61257.2	55980.6	69081.4	63029.1	60964.4	58099.1	56361.4	61820.5	63217.1	57573.5	64052.4		61415.6	59613.5	61665.9	182695		0.995941	0.966717		0.939681	0.358954
transcript=PF3D7_0610900.1	>PF3D7_0610900.1-p1 | transcript=PF3D7_0610900.1 | gene=PF3D7_0610900 | organism=Plasmodium_falciparum_3D7 | gene_product=transcription elongation factor SPT5, putative | transcript_product=transcription elongation factor SPT5, putative | location=Pf3D7_06_v3:456747-460589(-) | protein_length=1280 | sequence_SO=chromosome | SO=protein_coding | is_pseudo=false	23	23	23	23	23	23	23	23	23	23	23	23	276	156280	156621	187701	235216	177556	193521	178792	164522	175314	157181	139791	196559		183954	178598	167211	529763		1.10013	1.0681		0.48434	0.444286
transcript=PF3D7_0611400.1	>PF3D7_0611400.1-p1 | transcript=PF3D7_0611400.1 | gene=PF3D7_0611400 | organism=Plasmodium_falciparum_3D7 | gene_product=SWIB/MDM2 domain-containing protein | transcript_product=SWIB/MDM2 domain-containing protein | location=Pf3D7_06_v3:471658-474150(-) | protein_length=830 | sequence_SO=chromosome | SO=protein_coding | is_pseudo=false	19	19	19	19	19	19	19	19	19	19	19	19	228	228005	229086	233610	244069	227025	236991	230350	209797	227061	232060	234285	258585		233693	226041	237998	697731		0.981912	0.94976		0.612685	0.238938
transcript=PF3D7_0611900.1	>PF3D7_0611900.1-p1 | transcript=PF3D7_0611900.1 | gene=PF3D7_0611900 | organism=Plasmodium_falciparum_3D7 | gene_product=lsm12, putative | transcript_product=lsm12, putative | location=Pf3D7_06_v3:506380-507198(+) | protein_length=176 | sequence_SO=chromosome | SO=protein_coding | is_pseudo=false	4	4	4	4	4	4	4	4	4	4	4	4	48	115990	117693	139208	139901	124857	122487	121550	136881	134058	141920	125183	115969		128198	126444	129283	383925		0.991611	0.978042		0.904218	0.686144
transcript=PF3D7_0612100.1	>PF3D7_0612100.1-p1 | transcript=PF3D7_0612100.1 | gene=PF3D7_0612100 | organism=Plasmodium_falciparum_3D7 | gene_product=eukaryotic translation initiation factor 3 subunit L, putative | transcript_product=eukaryotic translation initiation factor 3 subunit L, putative | location=Pf3D7_06_v3:509160-511130(-) | protein_length=656 | sequence_SO=chromosome | SO=protein_coding | is_pseudo=false	8	8	8	8	8	8	8	8	8	8	8	8	96	466988	412068	502561	328801	422475	497489	488558	412972	341087	350709	408426	468148		427604	455373	392092	1.27507e+06		1.09057	1.16139		0.488136	0.139039
transcript=PF3D7_0612200.1	>PF3D7_0612200.1-p1 | transcript=PF3D7_0612200.1 | gene=PF3D7_0612200 | organism=Plasmodium_falciparum_3D7 | gene_product=leucine-rich repeat protein | transcript_product=leucine-rich repeat protein | location=Pf3D7_06_v3:512972-519548(-) | protein_length=1864 | sequence_SO=chromosome | SO=protein_coding | is_pseudo=false	33	33	33	33	33	33	33	33	33	33	33	33	396	84848.2	109815	132176	113407	103946	104146	107327	83849.3	107701	89604.7	98244	101924		110061	99817	99368.4	309247		1.10761	1.00451		0.365236	0.948111
transcript=PF3D7_0613300.1	>PF3D7_0613300.1-p1 | transcript=PF3D7_0613300.1 | gene=PF3D7_0613300 | organism=Plasmodium_falciparum_3D7 | gene_product=rhoptry protein ROP14 | transcript_product=rhoptry protein ROP14 | location=Pf3D7_06_v3:540077-544798(-) | protein_length=1422 | sequence_SO=chromosome | SO=protein_coding | is_pseudo=false	25	25	25	25	25	25	25	25	25	25	25	25	300	51487.4	70843.2	70226.6	75938.1	48984.8	62652.4	58274.1	78184.3	62922.9	67187.3	66292.6	45950.7		67123.8	62023.9	60588.3	189736		1.10787	1.02369		0.406003	0.861339
transcript=PF3D7_0613500.1	>PF3D7_0613500.1-p1 | transcript=PF3D7_0613500.1 | gene=PF3D7_0613500 | organism=Plasmodium_falciparum_3D7 | gene_product=AP-3 complex subunit beta, putative | transcript_product=AP-3 complex subunit beta, putative | location=Pf3D7_06_v3:548280-552371(-) | protein_length=1363 | sequence_SO=chromosome | SO=protein_coding | is_pseudo=false	5	5	5	5	5	5	5	5	5	5	5	5	60	5030.71	6309.15	2763.81	4511.83	5042.04	3596.49	4348.83	7319.56	5251.37	7183.86	6777.56	3247.19		4653.88	5076.73	5614.99	15345.6		0.82883	0.904138		0.438555	0.669876
transcript=PF3D7_0613700.1	>PF3D7_0613700.1-p1 | transcript=PF3D7_0613700.1 | gene=PF3D7_0613700 | organism=Plasmodium_falciparum_3D7 | gene_product=syntaxin-binding protein, putative | transcript_product=syntaxin-binding protein, putative | location=Pf3D7_06_v3:559349-561460(-) | protein_length=703 | sequence_SO=chromosome | SO=protein_coding | is_pseudo=false	8	8	8	8	8	8	8	8	8	8	8	8	96	60209.4	24061	18245.4	20320.3	17427.9	22203.9	20946.2	19186.5	21659.4	18246.2	17560.2	15932.7		30709	19941.1	18349.6	68999.8		1.67355	1.08673		0.301342	0.357074
transcript=PF3D7_0612700.1	>PF3D7_0612700.1-p1 | transcript=PF3D7_0612700.1 | gene=PF3D7_0612700 | organism=Plasmodium_falciparum_3D7 | gene_product=6-cysteine protein P12 | transcript_product=6-cysteine protein P12 | location=Pf3D7_06_v3:525987-527030(-) | protein_length=347 | sequence_SO=chromosome | SO=protein_coding | is_pseudo=false	15	15	15	15	15	15	15	15	15	15	15	15	180	108910	125383	125219	143116	75050.6	136215	133169	148029	85685.1	125405	128826	109007		125657	123116	112231	361004		1.11963	1.09699		0.313132	0.593339
transcript=PF3D7_0614400.1	>PF3D7_0614400.1-p1 | transcript=PF3D7_0614400.1 | gene=PF3D7_0614400 | organism=Plasmodium_falciparum_3D7 | gene_product=pre-mRNA-splicing factor CWF7, putative | transcript_product=pre-mRNA-splicing factor CWF7, putative | location=Pf3D7_06_v3:604573-605340(+) | protein_length=255 | sequence_SO=chromosome | SO=protein_coding | is_pseudo=false	8	8	8	8	8	8	8	8	8	8	8	8	96	25772.4	16840.5	18258.9	14792	25742	23570.6	85626.4	17772.3	25598.1	26970.9	24175.3	18714.4		18915.9	38177.8	23864.7	80958.5		0.792632	1.59976		0.153848	0.435621
transcript=PF3D7_0612900.1	>PF3D7_0612900.1-p1 | transcript=PF3D7_0612900.1 | gene=PF3D7_0612900 | organism=Plasmodium_falciparum_3D7 | gene_product=nucleolar GTP-binding protein 1, putative | transcript_product=nucleolar GTP-binding protein 1, putative | location=Pf3D7_06_v3:531126-533186(+) | protein_length=686 | sequence_SO=chromosome | SO=protein_coding | is_pseudo=false	13	13	13	13	13	13	13	13	13	13	13	13	156	231672	272785	281739	213744	203121	308845	319225	201122	214241	265544	201251	243824		249985	258078	231215	739278		1.08118	1.11618		0.422625	0.489595
transcript=PF3D7_0613800.1	>PF3D7_0613800.1-p1 | transcript=PF3D7_0613800.1 | gene=PF3D7_0613800 | organism=Plasmodium_falciparum_3D7 | gene_product=AP2 domain transcription factor, putative | transcript_product=AP2 domain transcription factor, putative | location=Pf3D7_06_v3:566139-578993(+) | protein_length=4109 | sequence_SO=chromosome | SO=protein_coding | is_pseudo=false	75	75	75	75	75	75	75	75	75	75	75	75	900	379700	458324	368634	438713	409471	365573	357573	383565	439833	406425	347026	396062		411343	379045	397336	1.18772e+06		1.03525	0.953966		0.64829	0.451572
transcript=PF3D7_0614500.1	>PF3D7_0614500.1-p1 | transcript=PF3D7_0614500.1 | gene=PF3D7_0614500 | organism=Plasmodium_falciparum_3D7 | gene_product=60S ribosomal protein L19 | transcript_product=60S ribosomal protein L19 | location=Pf3D7_06_v3:606142-607259(-) | protein_length=182 | sequence_SO=chromosome | SO=protein_coding | is_pseudo=false	5	5	5	5	5	5	5	5	5	5	5	5	60	2.9978e+06	3.59669e+06	2.60444e+06	2.96703e+06	3657440	2.93793e+06	3.18806e+06	3.53413e+06	3495620	3.4907e+06	3.0126e+06	3.38687e+06		3.04149e+06	3.32939e+06	3.34645e+06	9.71733e+06		0.908871	0.994903		0.254615	0.935059
transcript=PF3D7_0616100.1	>PF3D7_0616100.1-p1 | transcript=PF3D7_0616100.1 | gene=PF3D7_0616100 | organism=Plasmodium_falciparum_3D7 | gene_product=conserved Plasmodium protein, unknown function | transcript_product=conserved Plasmodium protein, unknown function | location=Pf3D7_06_v3:672119-672754(+) | protein_length=147 | sequence_SO=chromosome | SO=protein_coding | is_pseudo=false	2	2	2	2	2	2	2	2	2	2	2	2	24	28712.6	16319.7	27053.3	18579.7	21560.4	29809.9	25737.3	23039.4	13116.6	29026.5	31210.3	26875.3		22666.3	25036.7	25057.2	72760.3		0.904584	0.999183		0.657077	0.996553
transcript=PF3D7_0615400.1	>PF3D7_0615400.1-p1 | transcript=PF3D7_0615400.1 | gene=PF3D7_0615400 | organism=Plasmodium_falciparum_3D7 | gene_product=ribonuclease, putative | transcript_product=ribonuclease, putative | location=Pf3D7_06_v3:630956-640174(-) | protein_length=2729 | sequence_SO=chromosome | SO=protein_coding | is_pseudo=false	18	18	18	18	18	18	18	18	18	18	18	18	216	237103	246229	228870	300411	232486	284007	220030	273997	270504	250363	272636	282610		253153	252630	269028	774812		0.940991	0.939047		0.415491	0.38759
transcript=PF3D7_0616300.1	>PF3D7_0616300.1-p1 | transcript=PF3D7_0616300.1 | gene=PF3D7_0616300 | organism=Plasmodium_falciparum_3D7 | gene_product=conserved Plasmodium protein, unknown function | transcript_product=conserved Plasmodium protein, unknown function | location=Pf3D7_06_v3:676888-677571(-) | protein_length=227 | sequence_SO=chromosome | SO=protein_coding | is_pseudo=false	5	5	5	5	5	5	5	5	5	5	5	5	60	58069.6	58749.6	42454.4	32191.2	47966.7	54726.9	50667.2	57176.7	41375	52800	56824.5	44878.5		47866.2	52634.4	48969.5	149470		0.977469	1.07484		0.886952	0.413577
transcript=PF3D7_0615800.1	>PF3D7_0615800.1-p1 | transcript=PF3D7_0615800.1 | gene=PF3D7_0615800 | organism=Plasmodium_falciparum_3D7 | gene_product=conserved oligomeric Golgi complex subunit 4, putative | transcript_product=conserved oligomeric Golgi complex subunit 4, putative | location=Pf3D7_06_v3:657939-661789(-) | protein_length=1185 | sequence_SO=chromosome | SO=protein_coding | is_pseudo=false	4	4	4	4	4	4	4	4	4	4	4	4	48	379020	419967	434025	517015	413798	386890	406421	393322	387138	417903	454121	440327		437507	400108	424873	1.26249e+06		1.02974	0.941712		0.714915	0.192937
transcript=PF3D7_0616200.1	>PF3D7_0616200.1-p1 | transcript=PF3D7_0616200.1 | gene=PF3D7_0616200 | organism=Plasmodium_falciparum_3D7 | gene_product=kinetochore protein NDC80, putative | transcript_product=kinetochore protein NDC80, putative | location=Pf3D7_06_v3:674118-676375(+) | protein_length=591 | sequence_SO=chromosome | SO=protein_coding | is_pseudo=false	29	29	29	29	29	29	29	29	29	29	29	29	348	118086	138611	73165.3	134140	125448	114458	118258	126855	141194	131842	127449	133708		116001	121255	133548	370804		0.868605	0.907947		0.327151	0.0243089
transcript=PF3D7_0617100.1	>PF3D7_0617100.1-p1 | transcript=PF3D7_0617100.1 | gene=PF3D7_0617100 | organism=Plasmodium_falciparum_3D7 | gene_product=AP-2 complex subunit alpha, putative | transcript_product=AP-2 complex subunit alpha, putative | location=Pf3D7_06_v3:710059-714576(+) | protein_length=1236 | sequence_SO=chromosome | SO=protein_coding | is_pseudo=false	6	6	6	6	6	6	6	6	6	6	6	6	72	162762	162893	156725	137026	155912	180854	189549	176180	128664	159544	170965	171855		154852	175624	157757	488232		0.981583	1.11325		0.815441	0.203739
transcript=PF3D7_0617900.1	>PF3D7_0617900.1-p1 | transcript=PF3D7_0617900.1 | gene=PF3D7_0617900 | organism=Plasmodium_falciparum_3D7 | gene_product=histone H3 variant | transcript_product=histone H3 variant | location=Pf3D7_06_v3:754395-754805(+) | protein_length=136 | sequence_SO=chromosome | SO=protein_coding | is_pseudo=false	3	3	3	3	3	3	3	3	3	3	3	3	36	65879.2	108040	76335.4	95975.7	90750.5	50073.1	86266.9	130332	105730	91228.1	75935.9	44709.9		86557.7	89355.6	79401	255314		1.09013	1.12537		0.674672	0.652757
transcript=PF3D7_0617200.1	>PF3D7_0617200.1-p1 | transcript=PF3D7_0617200.1 | gene=PF3D7_0617200 | organism=Plasmodium_falciparum_3D7 | gene_product=conserved protein, unknown function | transcript_product=conserved protein, unknown function | location=Pf3D7_06_v3:717050-718917(+) | protein_length=446 | sequence_SO=chromosome | SO=protein_coding | is_pseudo=false	42	42	42	42	42	42	42	42	42	42	42	42	504	5.56374e+06	6.39274e+06	6.27421e+06	7.51497e+06	5928928	5398778	5793947	6626786	6679517	5.7742e+06	6245000	6056892		6436415	5.93711e+06	6.1889e+06	1.85624e+07		1.03999	0.959315		0.606676	0.462052
transcript=PF3D7_0617800.1	>PF3D7_0617800.1-p1 | transcript=PF3D7_0617800.1 | gene=PF3D7_0617800 | organism=Plasmodium_falciparum_3D7 | gene_product=histone H2A | transcript_product=histone H2A | location=Pf3D7_06_v3:748416-748814(-) | protein_length=132 | sequence_SO=chromosome | SO=protein_coding | is_pseudo=false	4	4	4	4	4	4	4	4	4	4	4	4	48	504456	506110	761799	369299	1.18536e+06	1.03911e+06	1.0491e+06	1.7687e+06	420881	229472	1.00059e+06	962939		535416	1.26057e+06	653471	2.44945e+06		0.819341	1.92903		0.604243	0.0584033
transcript=PF3D7_0618000.1	>PF3D7_0618000.1-p1 | transcript=PF3D7_0618000.1 | gene=PF3D7_0618000 | organism=Plasmodium_falciparum_3D7 | gene_product=conserved Plasmodium membrane protein, unknown function | transcript_product=conserved Plasmodium membrane protein, unknown function | location=Pf3D7_06_v3:758609-760996(+) | protein_length=795 | sequence_SO=chromosome | SO=protein_coding | is_pseudo=false	35	35	35	35	35	35	35	35	35	35	35	35	420	671047	820684	662436	815036	707159	661952	629756	685389	786311	733293	644190	684689		742301	671064	712121	2.12549e+06		1.04238	0.942346		0.594651	0.29658
transcript=PF3D7_0618500.1	>PF3D7_0618500.1-p1 | transcript=PF3D7_0618500.1 | gene=PF3D7_0618500 | organism=Plasmodium_falciparum_3D7 | gene_product=malate dehydrogenase | transcript_product=malate dehydrogenase | location=Pf3D7_06_v3:774529-775470(+) | protein_length=313 | sequence_SO=chromosome | SO=protein_coding | is_pseudo=false	9	9	9	9	9	9	9	9	9	9	9	9	108	105457	105668	93595.3	77849.8	19183.8	107143	112718	110520	109922	107223	93193.9	115643		95642.5	87391.2	106496	289529		0.898088	0.820609		0.234022	0.467167
transcript=PF3D7_0618200.1	>PF3D7_0618200.1-p1 | transcript=PF3D7_0618200.1 | gene=PF3D7_0618200 | organism=Plasmodium_falciparum_3D7 | gene_product=conserved protein, unknown function | transcript_product=conserved protein, unknown function | location=Pf3D7_06_v3:764667-765492(-) | protein_length=199 | sequence_SO=chromosome | SO=protein_coding | is_pseudo=false	8	8	8	8	8	8	8	8	8	8	8	8	96	248015	240900	206166	229841	195376	206161	226702	233196	234456	244577	197742	187951		231231	215359	216182	662771		1.06961	0.996194		0.402956	0.96178
transcript=PF3D7_0618300.1	>PF3D7_0618300.1-p1 | transcript=PF3D7_0618300.1 | gene=PF3D7_0618300 | organism=Plasmodium_falciparum_3D7 | gene_product=60S ribosomal protein L27a, putative | transcript_product=60S ribosomal protein L27a, putative | location=Pf3D7_06_v3:768792-769456(+) | protein_length=148 | sequence_SO=chromosome | SO=protein_coding | is_pseudo=false	7	7	7	7	7	7	7	7	7	7	7	7	84	10135457	11470267	11279795	15398680	11789663	11901449	12000159	12346272	13317395	12030242	11093685	12750014		1.2071e+07	1.20094e+07	12297834	3.63783e+07		0.981559	0.976545		0.864179	0.596681
transcript=PF3D7_0618700.1	>PF3D7_0618700.1-p1 | transcript=PF3D7_0618700.1 | gene=PF3D7_0618700 | organism=Plasmodium_falciparum_3D7 | gene_product=trafficking protein particle complex subunit 6A, putative | transcript_product=trafficking protein particle complex subunit 6A, putative | location=Pf3D7_06_v3:778692-779636(+) | protein_length=284 | sequence_SO=chromosome | SO=protein_coding | is_pseudo=false	5	5	5	5	5	5	5	5	5	5	5	5	60	215400	190146	242719	269706	248537	255372	216515	278160	196455	211539	231522	231747		229493	249646	217815	696954		1.05361	1.14614		0.572748	0.0899192
transcript=PF3D7_0620400.1	>PF3D7_0620400.1-p1 | transcript=PF3D7_0620400.1 | gene=PF3D7_0620400 | organism=Plasmodium_falciparum_3D7 | gene_product=merozoite surface protein 10 | transcript_product=merozoite surface protein 10 | location=Pf3D7_06_v3:851378-852955(-) | protein_length=525 | sequence_SO=chromosome | SO=protein_coding | is_pseudo=false	13	13	13	13	13	13	13	13	13	13	13	13	156	50407	97750.9	69161.2	85202.4	53948.7	66483.3	64733.3	83193.5	99618.9	82121.5	48998.2	92114.7		75630.4	67089.7	80713.3	223433		0.937025	0.83121		0.748743	0.335959
transcript=PF3D7_0620500.1	>PF3D7_0620500.1-p1 | transcript=PF3D7_0620500.1 | gene=PF3D7_0620500 | organism=Plasmodium_falciparum_3D7 | gene_product=cleavage stimulation factor subunit 1, putative | transcript_product=cleavage stimulation factor subunit 1, putative | location=Pf3D7_06_v3:855160-857112(+) | protein_length=650 | sequence_SO=chromosome | SO=protein_coding | is_pseudo=false	5	5	5	5	5	5	5	5	5	5	5	5	60	45063.9	48499.4	41871.1	37451.8	54978.1	48494.8	53614.2	50562.7	55904.4	45794.7	51413	54242		43221.5	51912.4	51838.5	146973		0.833772	1.00143		0.037357	0.97886
transcript=PF3D7_0619400.1	>PF3D7_0619400.1-p1 | transcript=PF3D7_0619400.1 | gene=PF3D7_0619400 | organism=Plasmodium_falciparum_3D7 | gene_product=cell division cycle protein 48 homologue, putative | transcript_product=cell division cycle protein 48 homologue, putative | location=Pf3D7_06_v3:815622-818247(-) | protein_length=828 | sequence_SO=chromosome | SO=protein_coding | is_pseudo=false	69	69	69	69	69	69	69	69	69	69	69	69	828	7.95728e+06	5402662	6590291	7.23835e+06	7.50415e+06	7.2887e+06	7.05589e+06	6.945e+06	7590512	6.96174e+06	10928910	6882830		6.79715e+06	7.19843e+06	8.091e+06	2.20866e+07		0.840087	0.889684		0.29587	0.422128
transcript=PF3D7_0619500.1	>PF3D7_0619500.1-p1 | transcript=PF3D7_0619500.1 | gene=PF3D7_0619500 | organism=Plasmodium_falciparum_3D7 | gene_product=acyl-CoA synthetase | transcript_product=acyl-CoA synthetase | location=Pf3D7_06_v3:820069-824247(-) | protein_length=1392 | sequence_SO=chromosome | SO=protein_coding | is_pseudo=false	23	23	23	23	23	23	23	23	23	23	23	23	276	107203	123069	96398.8	85780.6	116481	103744	104790	123412	125782	102048	94488.2	122190		103113	112107	111127	326346		0.927884	1.00882		0.494469	0.917304
transcript=PF3D7_0621900.1	>PF3D7_0621900.1-p1 | transcript=PF3D7_0621900.1 | gene=PF3D7_0621900 | organism=Plasmodium_falciparum_3D7 | gene_product=signal recognition particle subunit SRP68, putative | transcript_product=signal recognition particle subunit SRP68, putative | location=Pf3D7_06_v3:893450-895780(-) | protein_length=776 | sequence_SO=chromosome | SO=protein_coding | is_pseudo=false	6	6	6	6	6	6	6	6	6	6	6	6	72	32687.1	33497	38565.3	33099.4	25741.1	18081.1	23004	28178.6	41684.6	32280.1	26969.1	13942.7		34462.2	23751.2	28719.1	86932.5		1.19997	0.827017		0.399089	0.46854
transcript=PF3D7_0622200.1	>PF3D7_0622200.1-p1 | transcript=PF3D7_0622200.1 | gene=PF3D7_0622200 | organism=Plasmodium_falciparum_3D7 | gene_product=radical SAM protein, putative | transcript_product=radical SAM protein, putative | location=Pf3D7_06_v3:903740-906322(-) | protein_length=860 | sequence_SO=chromosome | SO=protein_coding | is_pseudo=false	8	8	8	8	8	8	8	8	8	8	8	8	96	17640.7	15645.6	18600.9	20822.6	17619.5	22954.7	26252	15785.1	25420.1	18762.5	12443.1	18470.1		18177.4	20652.8	18773.9	57604.2		0.968228	1.10008		0.845125	0.618792
transcript=PF3D7_0621200.1	>PF3D7_0621200.1-p1 | transcript=PF3D7_0621200.1 | gene=PF3D7_0621200 | organism=Plasmodium_falciparum_3D7 | gene_product=pyridoxine biosynthesis protein PDX1 | transcript_product=pyridoxine biosynthesis protein PDX1 | location=Pf3D7_06_v3:871297-872202(-) | protein_length=301 | sequence_SO=chromosome | SO=protein_coding | is_pseudo=false	31	31	31	31	31	31	31	31	31	31	31	31	372	2027525	2.18462e+06	2.08965e+06	2320804	2299778	2.36878e+06	2.33038e+06	2.0942e+06	2.07153e+06	2171850	2.2955e+06	2472718		2.15565e+06	2.27328e+06	2.2529e+06	6.68183e+06		0.956833	1.00905		0.403081	0.854488
transcript=PF3D7_0621800.1	>PF3D7_0621800.1-p1 | transcript=PF3D7_0621800.1 | gene=PF3D7_0621800 | organism=Plasmodium_falciparum_3D7 | gene_product=nascent polypeptide-associated complex subunit alpha, putative | transcript_product=nascent polypeptide-associated complex subunit alpha, putative | location=Pf3D7_06_v3:891997-892777(+) | protein_length=184 | sequence_SO=chromosome | SO=protein_coding | is_pseudo=false	20	20	20	20	20	20	20	20	20	20	20	20	240	2263082	2484949	2.31754e+06	3.23717e+06	2.29126e+06	2317108	2.27784e+06	2.64512e+06	2.82479e+06	2.51091e+06	2.53397e+06	2.38767e+06		2.57569e+06	2.38283e+06	2.56434e+06	7.52286e+06		1.00443	0.92922		0.965106	0.204836
transcript=PF3D7_0623300.1	>PF3D7_0623300.1-p1 | transcript=PF3D7_0623300.1 | gene=PF3D7_0623300 | organism=Plasmodium_falciparum_3D7 | gene_product=EGF-like membrane protein, putative | transcript_product=EGF-like membrane protein, putative | location=Pf3D7_06_v3:947493-948644(-) | protein_length=236 | sequence_SO=chromosome | SO=protein_coding | is_pseudo=false	3	3	3	3	3	3	3	3	3	3	3	3	36	14813.4	14076.4	17835.7	15157.5	29387.2	14601.6	13563.3	22557	22670.8	21058.7	28615.5	17401.6		15470.7	20027.3	22436.6	57934.6		0.68953	0.892614		0.0521925	0.606063
transcript=PF3D7_0622800.1	>PF3D7_0622800.1-p1 | transcript=PF3D7_0622800.1 | gene=PF3D7_0622800 | organism=Plasmodium_falciparum_3D7 | gene_product=leucine--tRNA ligase, putative | transcript_product=leucine--tRNA ligase, putative | location=Pf3D7_06_v3:919685-924028(+) | protein_length=1447 | sequence_SO=chromosome | SO=protein_coding | is_pseudo=false	35	35	35	35	35	35	35	35	35	35	35	35	420	330679	390858	342212	451378	378675	319151	328781	359394	435765	379992	368074	392240		378782	346500	394017	1.1193e+06		0.961333	0.879403		0.647735	0.0567733
transcript=PF3D7_0623600.1	>PF3D7_0623600.1-p1 | transcript=PF3D7_0623600.1 | gene=PF3D7_0623600 | organism=Plasmodium_falciparum_3D7 | gene_product=transcription or splicing factor-like protein, putative | transcript_product=transcription or splicing factor-like protein, putative | location=Pf3D7_06_v3:956765-958756(+) | protein_length=615 | sequence_SO=chromosome | SO=protein_coding | is_pseudo=false	10	10	10	10	10	10	10	10	10	10	10	10	120	16555	15606.7	21818.1	27744.5	18521.2	24017.6	16524.4	22956.5	19182.6	20026	18050.4	19163.8		20431.1	20505	19105.7	60041.7		1.06937	1.07324		0.6696	0.494903
transcript=PF3D7_0623100.1	>PF3D7_0623100.1-p1 | transcript=PF3D7_0623100.1 | gene=PF3D7_0623100 | organism=Plasmodium_falciparum_3D7 | gene_product=nuclear polyadenylated RNA-binding protein NAB2, putative | transcript_product=nuclear polyadenylated RNA-binding protein NAB2, putative | location=Pf3D7_06_v3:939660-943720(-) | protein_length=786 | sequence_SO=chromosome | SO=protein_coding | is_pseudo=false	7	7	7	7	7	7	7	7	7	7	7	7	84	147719	171287	264857	173451	249430	325590	258958	137672	136748	161865	153607	120274		189328	242913	143124	575365		1.32283	1.69722		0.172188	0.0797913
transcript=PF3D7_0624200.1	>PF3D7_0624200.1-p1 | transcript=PF3D7_0624200.1 | gene=PF3D7_0624200 | organism=Plasmodium_falciparum_3D7 | gene_product=conserved Plasmodium protein, unknown function | transcript_product=conserved Plasmodium protein, unknown function | location=Pf3D7_06_v3:985047-986870(-) | protein_length=341 | sequence_SO=chromosome | SO=protein_coding | is_pseudo=false	2	2	2	2	2	2	2	2	2	2	2	2	24	59956.9	23515.7	63397.5	66765.8	45751.1	60857.3	57154.2	56678.7	54151	56698	70055.9	66953.9		53409	55110.3	61964.7	170484		0.861926	0.889383		0.473152	0.225104
transcript=PF3D7_0623500.1	>PF3D7_0623500.1-p1 | transcript=PF3D7_0623500.1 | gene=PF3D7_0623500 | organism=Plasmodium_falciparum_3D7 | gene_product=superoxide dismutase [Fe] | transcript_product=superoxide dismutase [Fe] | location=Pf3D7_06_v3:952906-954848(-) | protein_length=266 | sequence_SO=chromosome | SO=protein_coding | is_pseudo=false	9	9	9	9	9	9	9	9	9	9	9	9	108	236317	203013	197527	205398	188465	215632	187504	221865	218501	224370	210725	184889		210564	203367	209621	623552		1.0045	0.970163		0.941566	0.634708
transcript=PF3D7_0625400.1	>PF3D7_0625400.1-p1 | transcript=PF3D7_0625400.1 | gene=PF3D7_0625400 | organism=Plasmodium_falciparum_3D7 | gene_product=conserved Plasmodium protein, unknown function | transcript_product=conserved Plasmodium protein, unknown function | location=Pf3D7_06_v3:1032536-1033774(-) | protein_length=412 | sequence_SO=chromosome | SO=protein_coding | is_pseudo=false	10	10	10	10	10	10	10	10	10	10	10	10	120	49959.3	74029.4	31059.8	78121.7	119209	69925.2	61033.6	75042.4	18253	37184.8	42423.9	40148		58292.5	81302.5	34502.4	174097		1.68952	2.35643		0.118589	0.0287497
transcript=PF3D7_0624000.1	>PF3D7_0624000.1-p1 | transcript=PF3D7_0624000.1 | gene=PF3D7_0624000 | organism=Plasmodium_falciparum_3D7 | gene_product=hexokinase | transcript_product=hexokinase | location=Pf3D7_06_v3:981066-982547(+) | protein_length=493 | sequence_SO=chromosome | SO=protein_coding | is_pseudo=false	32	32	32	32	32	32	32	32	32	32	32	32	384	777008	676015	775270	517616	665785	795044	789027	709469	580896	637451	643877	745327		686477	739831	651888	2.0782e+06		1.05306	1.13491		0.643211	0.107641
transcript=PF3D7_0624600.1	>PF3D7_0624600.1-p1 | transcript=PF3D7_0624600.1 | gene=PF3D7_0624600 | organism=Plasmodium_falciparum_3D7 | gene_product=SNF2 helicase, putative | transcript_product=SNF2 helicase, putative | location=Pf3D7_06_v3:999524-1007683(+) | protein_length=2719 | sequence_SO=chromosome | SO=protein_coding | is_pseudo=false	87	87	87	87	87	87	87	87	87	87	87	87	1044	823930	938398	805368	940207	893307	788178	797426	854445	887212	894734	867748	857995		876976	833339	876922	2.58724e+06		1.00006	0.9503		0.998932	0.177391
transcript=PF3D7_0626000.1	>PF3D7_0626000.1-p1 | transcript=PF3D7_0626000.1 | gene=PF3D7_0626000 | organism=Plasmodium_falciparum_3D7 | gene_product=conserved Plasmodium protein, unknown function | transcript_product=conserved Plasmodium protein, unknown function | location=Pf3D7_06_v3:1048710-1053965(-) | protein_length=1751 | sequence_SO=chromosome | SO=protein_coding | is_pseudo=false	8	8	8	8	8	8	8	8	8	8	8	8	96	1770744	2.08739e+06	1.85509e+06	1.68255e+06	1.77212e+06	1.81822e+06	1.68135e+06	1.73742e+06	1.48208e+06	1892557	1.71178e+06	1.68975e+06		1.84894e+06	1.75228e+06	1.69404e+06	5.29526e+06		1.09144	1.03438		0.247408	0.550578
transcript=PF3D7_0626700.1	>PF3D7_0626700.1-p1 | transcript=PF3D7_0626700.1 | gene=PF3D7_0626700 | organism=Plasmodium_falciparum_3D7 | gene_product=ATPase | transcript_product=ATPase | location=Pf3D7_06_v3:1075018-1076136(+) | protein_length=372 | sequence_SO=chromosome | SO=protein_coding | is_pseudo=false	16	16	16	16	16	16	16	16	16	16	16	16	192	402801	465337	466267	520534	441975	492525	523026	478049	399834	459499	448759	546132		463735	483894	463556	1.41118e+06		1.00039	1.04387		0.99648	0.585718
transcript=PF3D7_0626800.1	>PF3D7_0626800.1-p1 | transcript=PF3D7_0626800.1 | gene=PF3D7_0626800 | organism=Plasmodium_falciparum_3D7 | gene_product=pyruvate kinase | transcript_product=pyruvate kinase | location=Pf3D7_06_v3:1078995-1081320(+) | protein_length=511 | sequence_SO=chromosome | SO=protein_coding | is_pseudo=false	56	56	56	56	56	56	56	56	56	56	56	56	672	5814267	5901264	6124047	6034493	5.70714e+06	6.04542e+06	6201620	6288072	5649110	5.72715e+06	6111705	6172953		5.96852e+06	6.06056e+06	5.91523e+06	1.79443e+07		1.00901	1.02457		0.737524	0.46063
transcript=PF3D7_0627500.1	>PF3D7_0627500.1-p1 | transcript=PF3D7_0627500.1 | gene=PF3D7_0627500 | organism=Plasmodium_falciparum_3D7 | gene_product=protein DJ-1 | transcript_product=protein DJ-1 | location=Pf3D7_06_v3:1101734-1102852(-) | protein_length=189 | sequence_SO=chromosome | SO=protein_coding | is_pseudo=false	15	15	15	15	15	15	15	15	15	15	15	15	180	648541	666539	540947	574825	640755	647419	636764	617919	683347	545162	620698	679414		607713	635714	632155	1.87558e+06		0.961335	1.00563		0.598669	0.920371
transcript=PF3D7_0628100.1	>PF3D7_0628100.1-p1 | transcript=PF3D7_0628100.1 | gene=PF3D7_0628100 | organism=Plasmodium_falciparum_3D7 | gene_product=HECT-domain (ubiquitin-transferase), putative | transcript_product=HECT-domain (ubiquitin-transferase), putative | location=Pf3D7_06_v3:1122801-1153664(-) | protein_length=10287 | sequence_SO=chromosome | SO=protein_coding | is_pseudo=false	27	27	27	27	27	27	27	27	27	27	27	27	324	61679.9	70608.3	79672.4	102499	60049.6	79363	51933.3	59484.5	65240.8	64691.1	69258.1	64300		78615	62707.6	65872.5	207195		1.19344	0.951954		0.242344	0.629932
transcript=PF3D7_0628200.1	>PF3D7_0628200.1-p1 | transcript=PF3D7_0628200.1 | gene=PF3D7_0628200 | organism=Plasmodium_falciparum_3D7 | gene_product=eukaryotic translation initiation factor 2-alpha kinase | transcript_product=eukaryotic translation initiation factor 2-alpha kinase | location=Pf3D7_06_v3:1159862-1169080(+) | protein_length=3072 | sequence_SO=chromosome | SO=protein_coding | is_pseudo=false	30	30	30	30	30	30	30	30	30	30	30	30	360	59076.7	76813.9	62071.4	82804.8	98426	87655.5	93195.2	78981.6	87131.2	70936.4	21695	73739		70191.7	89564.6	63375.4	223132		1.10755	1.41324		0.681957	0.164323
transcript=PF3D7_0629100.1	>PF3D7_0629100.1-p1 | transcript=PF3D7_0629100.1 | gene=PF3D7_0629100 | organism=Plasmodium_falciparum_3D7 | gene_product=nicotinate phosphoribosyltransferase, putative | transcript_product=nicotinate phosphoribosyltransferase, putative | location=Pf3D7_06_v3:1196041-1198038(-) | protein_length=665 | sequence_SO=chromosome | SO=protein_coding | is_pseudo=false	14	14	14	14	14	14	14	14	14	14	14	14	168	50295.6	131091	93646.2	45762.1	85475.2	85906.6	133595	84835.2	76442	118674	104030	131305		80198.8	97453.1	107613	285265		0.745254	0.90559		0.294065	0.568808
transcript=PF3D7_0627700.1	>PF3D7_0627700.1-p1 | transcript=PF3D7_0627700.1 | gene=PF3D7_0627700 | organism=Plasmodium_falciparum_3D7 | gene_product=transportin | transcript_product=transportin | location=Pf3D7_06_v3:1108197-1111640(+) | protein_length=1147 | sequence_SO=chromosome | SO=protein_coding | is_pseudo=false	26	26	26	26	26	26	26	26	26	26	26	26	312	281160	297571	315178	244074	293675	328298	321139	301752	278426	261761	303060	300342		284496	311216	285897	881609		0.995098	1.08856		0.940977	0.094429
transcript=PF3D7_0629700.1	>PF3D7_0629700.1-p1 | transcript=PF3D7_0629700.1 | gene=PF3D7_0629700 | organism=Plasmodium_falciparum_3D7 | gene_product=SET domain protein, putative | transcript_product=SET domain protein, putative | location=Pf3D7_06_v3:1221941-1242922(+) | protein_length=6753 | sequence_SO=chromosome | SO=protein_coding | is_pseudo=false	36	36	36	36	36	36	36	36	36	36	36	36	432	77712.2	86189.5	75480.9	99187.3	113256	72599.7	141138	86324.3	79651.4	130721	118758	67921.7		84642.5	103330	99263.1	287235		0.852709	1.04097		0.416493	0.855586
transcript=PF3D7_0629800.1	>PF3D7_0629800.1-p1 | transcript=PF3D7_0629800.1 | gene=PF3D7_0629800 | organism=Plasmodium_falciparum_3D7 | gene_product=cullin-like protein, putative | transcript_product=cullin-like protein, putative | location=Pf3D7_06_v3:1243580-1247219(-) | protein_length=1129 | sequence_SO=chromosome | SO=protein_coding | is_pseudo=false	7	7	7	7	7	7	7	7	7	7	7	7	84	29706.5	29962.2	30287.3	19225	30186.1	34381.8	38619.2	26139.5	25016	26731.3	28759.8	29306.1		27295.2	32331.6	27453.3	87080.2		0.994243	1.1777		0.958815	0.167442
transcript=PF3D7_0629900.1	>PF3D7_0629900.1-p1 | transcript=PF3D7_0629900.1 | gene=PF3D7_0629900 | organism=Plasmodium_falciparum_3D7 | gene_product=sec14-like cytosolic factor or phosphatidylinositol/phosphatidylcholine transfer protein, putative | transcript_product=sec14-like cytosolic factor or phosphatidylinositol/phosphatidylcholine transfer protein, putative | location=Pf3D7_06_v3:1250412-1251651(+) | protein_length…	4	4	4	4	4	4	4	4	4	4	4	4	48	19974.9	19246.6	20366.8	14683.1	18419.9	22033.7	22368.1	24724.3	19460.1	19160.4	20542.3	22141.6		18567.9	21886.5	20326.1	60780.5		0.913499	1.07677		0.293532	0.34076
transcript=PF3D7_0630300.1	>PF3D7_0630300.1-p1 | transcript=PF3D7_0630300.1 | gene=PF3D7_0630300 | organism=Plasmodium_falciparum_3D7 | gene_product=DNA polymerase epsilon catalytic subunit A, putative | transcript_product=DNA polymerase epsilon catalytic subunit A, putative | location=Pf3D7_06_v3:1260398-1269596(-) | protein_length=2907 | sequence_SO=chromosome | SO=protein_coding | is_pseudo=false	20	20	20	20	20	20	20	20	20	20	20	20	240	22364.1	14001.1	22365.2	12772.2	24114.3	30339.4	25467.2	18731.1	20797.1	20661.2	22109.8	23641.5		17875.6	24663	21802.4	64341.1		0.819893	1.13121		0.230205	0.322228
transcript=PF3D7_0627800.1	>PF3D7_0627800.1-p1 | transcript=PF3D7_0627800.1 | gene=PF3D7_0627800 | organism=Plasmodium_falciparum_3D7 | gene_product=acetyl-CoA synthetase, putative | transcript_product=acetyl-CoA synthetase, putative | location=Pf3D7_06_v3:1114544-1117537(-) | protein_length=997 | sequence_SO=chromosome | SO=protein_coding | is_pseudo=false	15	15	15	15	15	15	15	15	15	15	15	15	180	139290	129727	111275	50215.4	138628	139356	131676	112365	106863	103881	100040	152184		107627	130506	115742	353875		0.929885	1.12756		0.743384	0.337293
transcript=PF3D7_0629200.1	>PF3D7_0629200.1-p1 | transcript=PF3D7_0629200.1 | gene=PF3D7_0629200 | organism=Plasmodium_falciparum_3D7 | gene_product=DnaJ protein, putative | transcript_product=DnaJ protein, putative | location=Pf3D7_06_v3:1199853-1200995(-) | protein_length=380 | sequence_SO=chromosome | SO=protein_coding | is_pseudo=false	24	24	24	24	24	24	24	24	24	24	24	24	288	289690	299701	290307	270055	296492	282510	312825	301610	295053	276826	292061	300605		287439	298359	291136	876934		0.987298	1.02481		0.662539	0.407707
transcript=PF3D7_0702400.1	>PF3D7_0702400.1-p1 | transcript=PF3D7_0702400.1 | gene=PF3D7_0702400 | organism=Plasmodium_falciparum_3D7 | gene_product=small exported membrane protein 1 | transcript_product=small exported membrane protein 1 | location=Pf3D7_07_v3:101694-102285(+) | protein_length=123 | sequence_SO=chromosome | SO=protein_coding | is_pseudo=false	8	8	8	8	8	8	8	8	8	8	8	8	96	312014	334015	336719	213588	319337	284916	320318	314417	266164	294594	307631	248813		299084	309747	279301	888132		1.07083	1.10901		0.567728	0.110709
transcript=PF3D7_0703200.1	>PF3D7_0703200.1-p1 | transcript=PF3D7_0703200.1 | gene=PF3D7_0703200 | organism=Plasmodium_falciparum_3D7 | gene_product=conserved Plasmodium protein, unknown function | transcript_product=conserved Plasmodium protein, unknown function | location=Pf3D7_07_v3:122513-127135(-) | protein_length=1540 | sequence_SO=chromosome | SO=protein_coding | is_pseudo=false	11	11	11	11	11	11	11	11	11	11	11	11	132	110523	116288	86140.5	99959.7	95570.8	93741	96158	91591.4	88232.4	103754	109324	95149.1		103228	94265.3	99114.6	296608		1.0415	0.951074		0.631514	0.37778
transcript=PF3D7_0702500.1	>PF3D7_0702500.1-p1 | transcript=PF3D7_0702500.1 | gene=PF3D7_0702500 | organism=Plasmodium_falciparum_3D7 | gene_product=Plasmodium exported protein, unknown function | transcript_product=Plasmodium exported protein, unknown function | location=Pf3D7_07_v3:104957-105989(-) | protein_length=253 | sequence_SO=chromosome | SO=protein_coding | is_pseudo=false	12	12	12	12	12	12	12	12	12	12	12	12	144	770530	881628	723063	960384	848669	765796	775023	842418	926093	903347	892447	878073		833901	807976	899990	2.54187e+06		0.926567	0.897761		0.307759	0.0167827
transcript=PF3D7_0702900.1	>PF3D7_0702900.1-p1 | transcript=PF3D7_0702900.1 | gene=PF3D7_0702900 | organism=Plasmodium_falciparum_3D7 | gene_product=centrin, putative | transcript_product=centrin, putative | location=Pf3D7_07_v3:113144-113948(-) | protein_length=107 | sequence_SO=chromosome | SO=protein_coding | is_pseudo=false	3	3	3	3	3	3	3	3	3	3	3	3	36	136637	161309	139802	176063	162156	129820	135883	137819	173964	160039	157585	141214		153453	141419	158200	453073		0.969989	0.893925		0.695078	0.137338
transcript=PF3D7_0703500.1	>PF3D7_0703500.1-p1 | transcript=PF3D7_0703500.1 | gene=PF3D7_0703500 | organism=Plasmodium_falciparum_3D7 | gene_product=erythrocyte membrane-associated antigen | transcript_product=erythrocyte membrane-associated antigen | location=Pf3D7_07_v3:135606-142505(+) | protein_length=2299 | sequence_SO=chromosome | SO=protein_coding | is_pseudo=false	75	75	75	75	75	75	75	75	75	75	75	75	900	409049	470924	415728	436372	436951	424216	390946	419401	385250	395346	384822	475146		433018	417878	410141	1.26104e+06		1.05578	1.01887		0.41618	0.761516
transcript=PF3D7_0704100.1	>PF3D7_0704100.1-p1 | transcript=PF3D7_0704100.1 | gene=PF3D7_0704100 | organism=Plasmodium_falciparum_3D7 | gene_product=conserved Plasmodium membrane protein, unknown function | transcript_product=conserved Plasmodium membrane protein, unknown function | location=Pf3D7_07_v3:180036-190715(+) | protein_length=3559 | sequence_SO=chromosome | SO=protein_coding | is_pseudo=false	37	37	37	37	37	37	37	37	37	37	37	37	444	46757.1	53653	40824.7	43151.3	42736.2	42182.1	42951	52616.7	50405.7	28680.5	37384.8	43712.2		46096.5	45121.5	40045.8	131264		1.1511	1.12675		0.314724	0.382486
transcript=PF3D7_0704200.1	>PF3D7_0704200.1-p1 | transcript=PF3D7_0704200.1 | gene=PF3D7_0704200 | organism=Plasmodium_falciparum_3D7 | gene_product=tRNA m5C-methyltransferase, putative | transcript_product=tRNA m5C-methyltransferase, putative | location=Pf3D7_07_v3:191309-194890(-) | protein_length=1193 | sequence_SO=chromosome | SO=protein_coding | is_pseudo=false	16	16	16	16	16	16	16	16	16	16	16	16	192	61850.5	53762.5	62797.9	22248.4	60705.3	80529.2	47366.7	44267.5	48103.5	34609.6	42578.4	38119.2		50164.8	58217.2	40852.7	149235		1.22795	1.42505		0.408822	0.123066
transcript=PF3D7_0703600.1	>PF3D7_0703600.1-p1 | transcript=PF3D7_0703600.1 | gene=PF3D7_0703600 | organism=Plasmodium_falciparum_3D7 | gene_product=conserved protein, unknown function | transcript_product=conserved protein, unknown function | location=Pf3D7_07_v3:144019-145953(+) | protein_length=262 | sequence_SO=chromosome | SO=protein_coding | is_pseudo=false	8	8	8	8	8	8	8	8	8	8	8	8	96	112518	137939	89623.3	131934	102680	97405.6	92573.6	117324	120582	117705	103131	111536		118004	102496	113239	333738		1.04208	0.905132		0.70291	0.159796
transcript=PF3D7_0704400.1	>PF3D7_0704400.1-p1 | transcript=PF3D7_0704400.1 | gene=PF3D7_0704400 | organism=Plasmodium_falciparum_3D7 | gene_product=phosphoinositide-binding protein, putative | transcript_product=phosphoinositide-binding protein, putative | location=Pf3D7_07_v3:204718-207750(+) | protein_length=1010 | sequence_SO=chromosome | SO=protein_coding | is_pseudo=false	10	10	10	10	10	10	10	10	10	10	10	10	120	27594.5	26206.5	28808	30954.7	31040.9	34117.3	31574	25880.2	23852.2	31311.9	31301.2	39527.4		28390.9	30653.1	31498.1	90542.2		0.901353	0.973171		0.412499	0.826251
transcript=PF3D7_0703700.1	>PF3D7_0703700.1-p1 | transcript=PF3D7_0703700.1 | gene=PF3D7_0703700 | organism=Plasmodium_falciparum_3D7 | gene_product=conserved protein, unknown function | transcript_product=conserved protein, unknown function | location=Pf3D7_07_v3:146645-147394(-) | protein_length=249 | sequence_SO=chromosome | SO=protein_coding | is_pseudo=false	3	3	3	3	3	3	3	3	3	3	3	3	36	649208	811288	663720	1.07336e+06	334742	312524	325263	233767	678006	497791	251296	377007		799393	301574	451025	1.55199e+06		1.77239	0.668641		0.0408326	0.198807
transcript=PF3D7_0704300.1	>PF3D7_0704300.1-p1 | transcript=PF3D7_0704300.1 | gene=PF3D7_0704300 | organism=Plasmodium_falciparum_3D7 | gene_product=conserved Plasmodium membrane protein, unknown function | transcript_product=conserved Plasmodium membrane protein, unknown function | location=Pf3D7_07_v3:197691-203249(+) | protein_length=1852 | sequence_SO=chromosome | SO=protein_coding | is_pseudo=false	62	62	62	62	62	62	62	62	62	62	62	62	744	389495	370211	345275	414470	382843	375732	354311	350035	386609	447446	359638	358671		379863	365731	388091	1.13368e+06		0.978798	0.942383		0.758743	0.374606
transcript=PF3D7_0704600.1	>PF3D7_0704600.1-p1 | transcript=PF3D7_0704600.1 | gene=PF3D7_0704600 | organism=Plasmodium_falciparum_3D7 | gene_product=E3 ubiquitin-protein ligase | transcript_product=E3 ubiquitin-protein ligase | location=Pf3D7_07_v3:216024-229072(-) | protein_length=3893 | sequence_SO=chromosome | SO=protein_coding | is_pseudo=false	25	25	25	25	25	25	25	25	25	25	25	25	300	89831.4	132868	144817	42741.8	138294	117701	133133	159680	125771	143416	95635	150842		102565	137202	128916	368682		0.795593	1.06427		0.365275	0.603542
transcript=PF3D7_0705400.1	>PF3D7_0705400.1-p1 | transcript=PF3D7_0705400.1 | gene=PF3D7_0705400 | organism=Plasmodium_falciparum_3D7 | gene_product=DNA replication licensing factor MCM7 | transcript_product=DNA replication licensing factor MCM7 | location=Pf3D7_07_v3:264973-267438(-) | protein_length=821 | sequence_SO=chromosome | SO=protein_coding | is_pseudo=false	43	43	43	43	43	43	43	43	43	43	43	43	516	389080	368843	323131	391785	452406	471731	444362	416073	485120	397169	389998	483539		368210	446143	438956	1.25331e+06		0.838831	1.01637		0.0698444	0.814069
transcript=PF3D7_0705500.1	>PF3D7_0705500.1-p1 | transcript=PF3D7_0705500.1 | gene=PF3D7_0705500 | organism=Plasmodium_falciparum_3D7 | gene_product=inositol-phosphate phosphatase, putative | transcript_product=inositol-phosphate phosphatase, putative | location=Pf3D7_07_v3:270022-278706(-) | protein_length=2814 | sequence_SO=chromosome | SO=protein_coding | is_pseudo=false	27	27	27	27	27	27	27	27	27	27	27	27	324	166914	190893	60147.4	187334	174036	157571	164120	88375	51938.8	143250	150753	179058		151322	146025	131250	428597		1.15293	1.11258		0.64481	0.678484
transcript=PF3D7_0705700.1	>PF3D7_0705700.1-p1 | transcript=PF3D7_0705700.1 | gene=PF3D7_0705700 | organism=Plasmodium_falciparum_3D7 | gene_product=40S ribosomal protein S29, putative | transcript_product=40S ribosomal protein S29, putative | location=Pf3D7_07_v3:285472-286166(-) | protein_length=54 | sequence_SO=chromosome | SO=protein_coding | is_pseudo=false	5	5	5	5	5	5	5	5	5	5	5	5	60	1.03865e+06	1.18459e+06	898536	1.18486e+06	1.09702e+06	964917	1.02696e+06	1.05791e+06	1.06795e+06	1.09922e+06	1.03192e+06	1.0894e+06		1.07666e+06	1.0367e+06	1.07212e+06	3.18548e+06		1.00423	0.966962		0.952227	0.317925
transcript=PF3D7_0706000.1	>PF3D7_0706000.1-p1 | transcript=PF3D7_0706000.1 | gene=PF3D7_0706000 | organism=Plasmodium_falciparum_3D7 | gene_product=importin-7, putative | transcript_product=importin-7, putative | location=Pf3D7_07_v3:293400-297089(+) | protein_length=1229 | sequence_SO=chromosome | SO=protein_coding | is_pseudo=false	30	30	30	30	30	30	30	30	30	30	30	30	360	548416	501128	600596	489753	572548	584976	633259	556591	522064	505624	566248	633082		534973	586844	556755	1.67857e+06		0.960878	1.05404		0.588491	0.404274
transcript=PF3D7_0706500.1	>PF3D7_0706500.1-p1 | transcript=PF3D7_0706500.1 | gene=PF3D7_0706500 | organism=Plasmodium_falciparum_3D7 | gene_product=conserved Plasmodium protein, unknown function | transcript_product=conserved Plasmodium protein, unknown function | location=Pf3D7_07_v3:309902-315022(-) | protein_length=1706 | sequence_SO=chromosome | SO=protein_coding | is_pseudo=false	44	44	44	44	44	44	44	44	44	44	44	44	528	191660	202283	192924	248147	160815	135752	156763	148665	216354	173917	162383	157687		208753	150499	177585	536837		1.17551	0.847472		0.149964	0.134443
transcript=PF3D7_0707600.1	>PF3D7_0707600.1-p1 | transcript=PF3D7_0707600.1 | gene=PF3D7_0707600 | organism=Plasmodium_falciparum_3D7 | gene_product=mediator of RNA polymerase II transcription subunit 10, putative | transcript_product=mediator of RNA polymerase II transcription subunit 10, putative | location=Pf3D7_07_v3:353986-354720(+) | protein_length=244 | sequence_SO=chromosome | SO=protein_coding | is_pseudo=false	3	3	3	3	3	3	3	3	3	3	3	3	36	39044.9	22845.1	39733.8	26008.8	57150.2	49034.4	52992.2	29139.6	50515	47961	54188.2	43920.2		31908.2	47079.1	49146.1	128133		0.649251	0.957941		0.0206962	0.76993
transcript=PF3D7_0707700.1	>PF3D7_0707700.1-p1 | transcript=PF3D7_0707700.1 | gene=PF3D7_0707700 | organism=Plasmodium_falciparum_3D7 | gene_product=E3 ubiquitin-protein ligase, putative | transcript_product=E3 ubiquitin-protein ligase, putative | location=Pf3D7_07_v3:357700-360585(+) | protein_length=961 | sequence_SO=chromosome | SO=protein_coding | is_pseudo=false	12	12	12	12	12	12	12	12	12	12	12	12	144	58301.2	59798.1	25298.3	17250.9	62953.8	59994.4	52573	61746.7	52948.2	67880.6	27755.3	67783.4		40162.1	59316.9	54091.9	153571		0.742479	1.0966		0.375521	0.625008
transcript=PF3D7_0707200.1	>PF3D7_0707200.1-p1 | transcript=PF3D7_0707200.1 | gene=PF3D7_0707200 | organism=Plasmodium_falciparum_3D7 | gene_product=conserved Plasmodium protein, unknown function | transcript_product=conserved Plasmodium protein, unknown function | location=Pf3D7_07_v3:329936-336325(-) | protein_length=2129 | sequence_SO=chromosome | SO=protein_coding | is_pseudo=false	12	12	12	12	12	12	12	12	12	12	12	12	144	256766	279364	224075	306343	277849	227442	272912	226407	271251	295540	264925	283843		266637	251153	278890	796679		0.956065	0.900544		0.549305	0.144197
transcript=PF3D7_0708300.1	>PF3D7_0708300.1-p1 | transcript=PF3D7_0708300.1 | gene=PF3D7_0708300 | organism=Plasmodium_falciparum_3D7 | gene_product=EKC/KEOPS complex subunit BUD32 | transcript_product=EKC/KEOPS complex subunit BUD32 | location=Pf3D7_07_v3:378031-379305(+) | protein_length=229 | sequence_SO=chromosome | SO=protein_coding | is_pseudo=false	4	4	4	4	4	4	4	4	4	4	4	4	48	11076.8	21416.5	20154.9	20444.8	14855.1	20819.8	19278.3	16568.6	21287.5	15930.9	16421.9	13966.3		18273.2	17880.5	16901.6	53055.3		1.08115	1.05791		0.652573	0.650476
transcript=PF3D7_0707300.1	>PF3D7_0707300.1-p1 | transcript=PF3D7_0707300.1 | gene=PF3D7_0707300 | organism=Plasmodium_falciparum_3D7 | gene_product=rhoptry-associated membrane antigen | transcript_product=rhoptry-associated membrane antigen | location=Pf3D7_07_v3:338885-342083(+) | protein_length=861 | sequence_SO=chromosome | SO=protein_coding | is_pseudo=false	16	16	16	16	16	16	16	16	16	16	16	16	192	1.46569e+06	1.74081e+06	1.58016e+06	1.77757e+06	1.52909e+06	1.50418e+06	1.57762e+06	1.7456e+06	1.94006e+06	1.76714e+06	1.52087e+06	1.43043e+06		1.64106e+06	1.58913e+06	1.66463e+06	4.89481e+06		0.98584	0.954643		0.870019	0.585855
transcript=PF3D7_0708500.1	>PF3D7_0708500.1-p1 | transcript=PF3D7_0708500.1 | gene=PF3D7_0708500 | organism=Plasmodium_falciparum_3D7 | gene_product=heat shock protein 86 family protein | transcript_product=heat shock protein 86 family protein | location=Pf3D7_07_v3:385583-388321(-) | protein_length=912 | sequence_SO=chromosome | SO=protein_coding | is_pseudo=false	6	6	6	6	6	6	6	6	6	6	6	6	72	29010.4	62440.9	27782.9	72716.7	18865.6	68111.9	22830.5	72053.1	15179.9	12510.7	18370.2	27106.7		47987.7	45465.3	18291.9	111745		2.62344	2.48554		0.0775639	0.151459
transcript=PF3D7_0708100.1	>PF3D7_0708100.1-p1 | transcript=PF3D7_0708100.1 | gene=PF3D7_0708100 | organism=Plasmodium_falciparum_3D7 | gene_product=DNA-directed RNA polymerases I, II, and III subunit RPABC5, putative | transcript_product=DNA-directed RNA polymerases I, II, and III subunit RPABC5, putative | location=Pf3D7_07_v3:372897-373106(-) | protein_length=69 | sequence_SO=chromosome | SO=protein_coding | is_pseudo=f…	3	3	3	3	3	3	3	3	3	3	3	3	36	175063	179603	211636	150023	164251	183105	170170	174279	198279	156013	125884	155540		179081	172951	158929	510962		1.1268	1.08823		0.343108	0.422253
transcript=PF3D7_0708400.1	>PF3D7_0708400.1-p1 | transcript=PF3D7_0708400.1 | gene=PF3D7_0708400 | organism=Plasmodium_falciparum_3D7 | gene_product=heat shock protein 90 | transcript_product=heat shock protein 90 | location=Pf3D7_07_v3:381592-384614(+) | protein_length=745 | sequence_SO=chromosome | SO=protein_coding | is_pseudo=false	64	64	64	64	64	64	64	64	64	64	64	64	768	28346842	31906556	28122526	31107862	30869004	30110324	29789832	30570534	32828562	29975314	28145478	33768232		2.98709e+07	3.03349e+07	3.11794e+07	9.13853e+07		0.958035	0.972916		0.45009	0.563868
transcript=PF3D7_0709400.1	>PF3D7_0709400.1-p1 | transcript=PF3D7_0709400.1 | gene=PF3D7_0709400 | organism=Plasmodium_falciparum_3D7 | gene_product=Cg7 protein | transcript_product=Cg7 protein | location=Pf3D7_07_v3:423236-427234(-) | protein_length=1281 | sequence_SO=chromosome | SO=protein_coding | is_pseudo=false	4	4	4	4	4	4	4	4	4	4	4	4	48	73719.9	73911.8	78409.1	99366.8	77175.5	69682.4	77017.4	81941.7	87756	79466.3	81191	85433		81351.9	76454.3	83461.6	241268		0.974723	0.916042		0.759757	0.0722415
transcript=PF3D7_0708800.1	>PF3D7_0708800.1-p1 | transcript=PF3D7_0708800.1 | gene=PF3D7_0708800 | organism=Plasmodium_falciparum_3D7 | gene_product=heat shock protein 110 | transcript_product=heat shock protein 110 | location=Pf3D7_07_v3:395711-398332(+) | protein_length=873 | sequence_SO=chromosome | SO=protein_coding | is_pseudo=false	50	50	50	50	50	50	50	50	50	50	50	50	600	4.68404e+06	5002699	4217799	4460892	4827793	4448432	4641714	4858701	4919758	4.72649e+06	4619500	4920071		4.59136e+06	4694160	4.79645e+06	1.4082e+07		0.95724	0.978673		0.322583	0.43088
transcript=PF3D7_0709700.1	>PF3D7_0709700.1-p1 | transcript=PF3D7_0709700.1 | gene=PF3D7_0709700 | organism=Plasmodium_falciparum_3D7 | gene_product=prodrug activation and resistance esterase | transcript_product=prodrug activation and resistance esterase | location=Pf3D7_07_v3:435089-436195(-) | protein_length=368 | sequence_SO=chromosome | SO=protein_coding | is_pseudo=false	16	16	16	16	16	16	16	16	16	16	16	16	192	84344.7	68808.9	56847.8	50321.8	73668.4	83610.5	77331.2	66565.7	69277	78254.6	75099.8	69682		65080.8	75294	73078.3	213453		0.890562	1.03032		0.369932	0.61836
transcript=PF3D7_0709300.1	>PF3D7_0709300.1-p1 | transcript=PF3D7_0709300.1 | gene=PF3D7_0709300 | organism=Plasmodium_falciparum_3D7 | gene_product=Cg2 protein | transcript_product=Cg2 protein | location=Pf3D7_07_v3:413560-421749(-) | protein_length=2729 | sequence_SO=chromosome | SO=protein_coding | is_pseudo=false	9	9	9	9	9	9	9	9	9	9	9	9	108	760258	869671	589644	458773	772573	649631	648351	806283	829901	753653	669481	698348		669586	719210	737846	2.12664e+06		0.907488	0.974743		0.523463	0.742949
transcript=PF3D7_0709500.1	>PF3D7_0709500.1-p1 | transcript=PF3D7_0709500.1 | gene=PF3D7_0709500 | organism=Plasmodium_falciparum_3D7 | gene_product=conserved Plasmodium protein, unknown function | transcript_product=conserved Plasmodium protein, unknown function | location=Pf3D7_07_v3:428723-429346(+) | protein_length=135 | sequence_SO=chromosome | SO=protein_coding | is_pseudo=false	5	5	5	5	5	5	5	5	5	5	5	5	60	184648	201824	192764	260576	195881	187916	210827	211328	192461	209204	210747	219483		209953	201488	207974	619415		1.00951	0.968813		0.918865	0.452359
transcript=PF3D7_0710700.1	>PF3D7_0710700.1-p1 | transcript=PF3D7_0710700.1 | gene=PF3D7_0710700 | organism=Plasmodium_falciparum_3D7 | gene_product=conserved Plasmodium protein, unknown function | transcript_product=conserved Plasmodium protein, unknown function | location=Pf3D7_07_v3:481369-481974(-) | protein_length=201 | sequence_SO=chromosome | SO=protein_coding | is_pseudo=false	4	4	4	4	4	4	4	4	4	4	4	4	48	77207.6	94073	58690.7	76216.2	84855.7	68176.3	79168.8	86172	87914.7	90096.5	75751.3	78971.8		76546.9	79593.2	83183.6	239324		0.920216	0.956838		0.450793	0.528505
transcript=PF3D7_0710200.1	>PF3D7_0710200.1-p1 | transcript=PF3D7_0710200.1 | gene=PF3D7_0710200 | organism=Plasmodium_falciparum_3D7 | gene_product=conserved Plasmodium protein, unknown function | transcript_product=conserved Plasmodium protein, unknown function | location=Pf3D7_07_v3:463105-471837(+) | protein_length=2910 | sequence_SO=chromosome | SO=protein_coding | is_pseudo=false	103	103	103	103	103	103	103	103	103	103	103	103	1236	374737	441646	426061	529186	403454	405008	370669	401029	411223	439564	427529	453085		442907	395040	432850	1.2708e+06		1.02323	0.912649		0.780075	0.0205117
transcript=PF3D7_0710600.1	>PF3D7_0710600.1-p1 | transcript=PF3D7_0710600.1 | gene=PF3D7_0710600 | organism=Plasmodium_falciparum_3D7 | gene_product=60S ribosomal protein L34 | transcript_product=60S ribosomal protein L34 | location=Pf3D7_07_v3:478468-479138(-) | protein_length=150 | sequence_SO=chromosome | SO=protein_coding | is_pseudo=false	3	3	3	3	3	3	3	3	3	3	3	3	36	492641	491587	408252	203686	543224	473939	547909	598795	378075	494495	499021	421884		399042	540967	448369	1.38838e+06		0.889985	1.20652		0.541434	0.0558189
transcript=PF3D7_0711000.1	>PF3D7_0711000.1-p1 | transcript=PF3D7_0711000.1 | gene=PF3D7_0711000 | organism=Plasmodium_falciparum_3D7 | gene_product=AAA family ATPase, CDC48 subfamily | transcript_product=AAA family ATPase, CDC48 subfamily | location=Pf3D7_07_v3:487281-490970(-) | protein_length=1229 | sequence_SO=chromosome | SO=protein_coding | is_pseudo=false	34	34	34	34	34	34	34	34	34	34	34	34	408	144099	146104	140169	144542	139479	187761	191427	147361	220084	163353	178903	183107		143728	166507	186362	496597		0.771233	0.893461		0.037362	0.31361
transcript=PF3D7_0711500.1	>PF3D7_0711500.1-p1 | transcript=PF3D7_0711500.1 | gene=PF3D7_0711500 | organism=Plasmodium_falciparum_3D7 | gene_product=regulator of chromosome condensation, putative | transcript_product=regulator of chromosome condensation, putative | location=Pf3D7_07_v3:505245-507311(+) | protein_length=688 | sequence_SO=chromosome | SO=protein_coding | is_pseudo=false	27	27	27	27	27	27	27	27	27	27	27	27	324	1.29036e+06	1.32743e+06	1.04689e+06	1.06286e+06	1.12909e+06	1.17595e+06	1.1224e+06	1.03372e+06	1.13512e+06	1.13347e+06	1.06669e+06	1164527		1.18189e+06	1.11529e+06	1.12495e+06	3.42213e+06		1.05061	0.991413		0.504667	0.799462
transcript=PF3D7_0714000.1	>PF3D7_0714000.1-p1 | transcript=PF3D7_0714000.1 | gene=PF3D7_0714000 | organism=Plasmodium_falciparum_3D7 | gene_product=histone H2B variant | transcript_product=histone H2B variant | location=Pf3D7_07_v3:643101-643472(-) | protein_length=123 | sequence_SO=chromosome | SO=protein_coding | is_pseudo=false	10	10	10	10	10	10	10	10	10	10	10	10	120	1.11955e+06	1.10224e+06	1.00562e+06	673966	1.07002e+06	1.13984e+06	1236259	1.18716e+06	1.13488e+06	1.02545e+06	1.21629e+06	1365031		975344	1.15832e+06	1.18541e+06	3.31907e+06		0.82279	0.977145		0.152253	0.749849
transcript=PF3D7_0714200.1	>PF3D7_0714200.1-p1 | transcript=PF3D7_0714200.1 | gene=PF3D7_0714200 | organism=Plasmodium_falciparum_3D7 | gene_product=conserved Plasmodium protein, unknown function | transcript_product=conserved Plasmodium protein, unknown function | location=Pf3D7_07_v3:650834-654919(+) | protein_length=1361 | sequence_SO=chromosome | SO=protein_coding | is_pseudo=false	21	21	21	21	21	21	21	21	21	21	21	21	252	330873	413679	301803	393336	366615	327186	338478	348523	336464	382106	382488	370347		359923	345200	367852	1.07297e+06		0.978445	0.938423		0.793515	0.152197
transcript=PF3D7_0714500.1	>PF3D7_0714500.1-p1 | transcript=PF3D7_0714500.1 | gene=PF3D7_0714500 | organism=Plasmodium_falciparum_3D7 | gene_product=transcription elongation factor s-II, putative | transcript_product=transcription elongation factor s-II, putative | location=Pf3D7_07_v3:664956-666167(+) | protein_length=403 | sequence_SO=chromosome | SO=protein_coding | is_pseudo=false	13	13	13	13	13	13	13	13	13	13	13	13	156	579556	671484	689411	914146	607280	657101	700744	646281	683580	721387	803883	642650		713649	652851	712875	2.07938e+06		1.00109	0.915801		0.992606	0.19114
transcript=PF3D7_0715200.1	>PF3D7_0715200.1-p1 | transcript=PF3D7_0715200.1 | gene=PF3D7_0715200 | organism=Plasmodium_falciparum_3D7 | gene_product=conserved Plasmodium protein, unknown function | transcript_product=conserved Plasmodium protein, unknown function | location=Pf3D7_07_v3:676061-682681(-) | protein_length=2206 | sequence_SO=chromosome | SO=protein_coding | is_pseudo=false	34	34	34	34	34	34	34	34	34	34	34	34	408	218260	243593	188600	249732	230400	208408	193246	221236	239862	226337	194878	224844		225046	213322	221480	659849		1.0161	0.963168		0.840326	0.537428
transcript=PF3D7_0715900.1	>PF3D7_0715900.1-p1 | transcript=PF3D7_0715900.1 | gene=PF3D7_0715900 | organism=Plasmodium_falciparum_3D7 | gene_product=cation diffusion facilitator family protein, putative | transcript_product=cation diffusion facilitator family protein, putative | location=Pf3D7_07_v3:699239-700909(+) | protein_length=556 | sequence_SO=chromosome | SO=protein_coding | is_pseudo=false	8	8	8	8	8	8	8	8	8	8	8	8	96	1.01013e+06	1.01665e+06	1.1486e+06	1.43168e+06	1099797	1.04928e+06	1.10339e+06	1.20829e+06	1.218e+06	1.06756e+06	1004858	1.06612e+06		1.15177e+06	1.11519e+06	1.08914e+06	3.35609e+06		1.0575	1.02392		0.593356	0.661478
transcript=PF3D7_0716400.1	>PF3D7_0716400.1-p1 | transcript=PF3D7_0716400.1 | gene=PF3D7_0716400 | organism=Plasmodium_falciparum_3D7 | gene_product=transcription initiation factor IIA subunit 1, putative | transcript_product=transcription initiation factor IIA subunit 1, putative | location=Pf3D7_07_v3:720010-721467(+) | protein_length=174 | sequence_SO=chromosome | SO=protein_coding | is_pseudo=false	3	3	3	3	3	3	3	3	3	3	3	3	36	58342.4	76810.6	83855.9	106771	59129.3	49831.2	50589.5	103704	67330.3	68303.4	56152.4	47630.3		81445.1	65813.4	59854.1	207113		1.36073	1.09956		0.118959	0.687109
transcript=PF3D7_0716000.1	>PF3D7_0716000.1-p1 | transcript=PF3D7_0716000.1 | gene=PF3D7_0716000 | organism=Plasmodium_falciparum_3D7 | gene_product=RNA-binding protein, putative | transcript_product=RNA-binding protein, putative | location=Pf3D7_07_v3:703207-706584(+) | protein_length=1125 | sequence_SO=chromosome | SO=protein_coding | is_pseudo=false	7	7	7	7	7	7	7	7	7	7	7	7	84	162565	126588	122384	146295	138150	142502	144455	174405	154973	121266	176189	162868		139458	149878	153824	443160		0.906609	0.974348		0.375436	0.793355
transcript=PF3D7_0717500.1	>PF3D7_0717500.1-p1 | transcript=PF3D7_0717500.1 | gene=PF3D7_0717500 | organism=Plasmodium_falciparum_3D7 | gene_product=calcium-dependent protein kinase 4 | transcript_product=calcium-dependent protein kinase 4 | location=Pf3D7_07_v3:755763-757696(+) | protein_length=528 | sequence_SO=chromosome | SO=protein_coding | is_pseudo=false	7	7	7	7	7	7	7	7	7	7	7	7	84	39260.1	49800	35887.5	14285.4	21968.4	39895.1	15788.4	34452.3	33170.9	25152.6	38801.7	19399.7		34808.2	28026	29131.2	91965.5		1.19488	0.962061		0.539555	0.880145
transcript=PF3D7_0716300.1	>PF3D7_0716300.1-p1 | transcript=PF3D7_0716300.1 | gene=PF3D7_0716300 | organism=Plasmodium_falciparum_3D7 | gene_product=conserved protein, unknown function | transcript_product=conserved protein, unknown function | location=Pf3D7_07_v3:717281-718968(+) | protein_length=522 | sequence_SO=chromosome | SO=protein_coding | is_pseudo=false	16	16	16	16	16	16	16	16	16	16	16	16	192	1.1357e+06	1.36338e+06	1.12085e+06	1.42445e+06	1185791	1.04705e+06	1040355	1.14707e+06	1.19516e+06	1.22463e+06	1.23904e+06	1.20451e+06		1.2611e+06	1.10506e+06	1.21584e+06	3.582e+06		1.03723	0.908893		0.602928	0.0509435
transcript=PF3D7_0718500.1	>PF3D7_0718500.1-p1 | transcript=PF3D7_0718500.1 | gene=PF3D7_0718500 | organism=Plasmodium_falciparum_3D7 | gene_product=prefoldin subunit 3, putative | transcript_product=prefoldin subunit 3, putative | location=Pf3D7_07_v3:824445-825884(+) | protein_length=192 | sequence_SO=chromosome | SO=protein_coding | is_pseudo=false	7	7	7	7	7	7	7	7	7	7	7	7	84	72036.1	75525.5	78019.4	48852.3	72183.8	79180	73205.4	64159.1	66734.4	62508.3	84116	77510		68608.3	72182.1	72717.2	213508		0.943496	0.992641		0.640585	0.930362
transcript=PF3D7_0716800.1	>PF3D7_0716800.1-p1 | transcript=PF3D7_0716800.1 | gene=PF3D7_0716800 | organism=Plasmodium_falciparum_3D7 | gene_product=eukaryotic translation initiation factor 3 subunit I, putative | transcript_product=eukaryotic translation initiation factor 3 subunit I, putative | location=Pf3D7_07_v3:732070-733496(-) | protein_length=327 | sequence_SO=chromosome | SO=protein_coding | is_pseudo=false	19	19	19	19	19	19	19	19	19	19	19	19	228	502466	495563	500323	398654	500243	483754	517058	465016	472637	477212	457303	512882		474251	491518	480008	1.44578e+06		0.988007	1.02398		0.845745	0.504162
transcript=PF3D7_0717700.1	>PF3D7_0717700.1-p1 | transcript=PF3D7_0717700.1 | gene=PF3D7_0717700 | organism=Plasmodium_falciparum_3D7 | gene_product=serine--tRNA ligase, putative | transcript_product=serine--tRNA ligase, putative | location=Pf3D7_07_v3:764794-766413(-) | protein_length=539 | sequence_SO=chromosome | SO=protein_coding | is_pseudo=false	26	26	26	26	26	26	26	26	26	26	26	26	312	537059	586347	518064	587470	521852	454276	509517	542032	538850	573134	491575	559435		557235	506919	540748	1.6049e+06		1.03049	0.93744		0.534683	0.239556
transcript=PF3D7_0719000.1	>PF3D7_0719000.1-p1 | transcript=PF3D7_0719000.1 | gene=PF3D7_0719000 | organism=Plasmodium_falciparum_3D7 | gene_product=conserved protein, unknown function | transcript_product=conserved protein, unknown function | location=Pf3D7_07_v3:838135-838596(+) | protein_length=153 | sequence_SO=chromosome | SO=protein_coding | is_pseudo=false	9	9	9	9	9	9	9	9	9	9	9	9	108	99224.6	112502	141062	201792	124896	124136	134811	146088	131072	146883	147991	137808		138645	132483	140939	412067		0.983729	0.940005		0.926954	0.244999
transcript=PF3D7_0720200.1	>PF3D7_0720200.1-p1 | transcript=PF3D7_0720200.1 | gene=PF3D7_0720200 | organism=Plasmodium_falciparum_3D7 | gene_product=conserved protein, unknown function | transcript_product=conserved protein, unknown function | location=Pf3D7_07_v3:879454-879946(+) | protein_length=121 | sequence_SO=chromosome | SO=protein_coding | is_pseudo=false	6	6	6	6	6	6	6	6	6	6	6	6	72	82810.8	107119	99588.3	123709	63100.5	111706	103785	101981	132701	77962.1	95835.5	51931.3		103307	95142.9	89607.4	288057		1.15288	1.06177		0.506485	0.794313
transcript=PF3D7_0720400.1	>PF3D7_0720400.1-p1 | transcript=PF3D7_0720400.1 | gene=PF3D7_0720400 | organism=Plasmodium_falciparum_3D7 | gene_product=apoptosis-inducing factor, putative | transcript_product=apoptosis-inducing factor, putative | location=Pf3D7_07_v3:882936-884988(+) | protein_length=642 | sequence_SO=chromosome | SO=protein_coding | is_pseudo=false	23	23	23	23	23	23	23	23	23	23	23	23	276	59510.5	65405.5	47728.3	28862.9	59316.2	76643	65441.1	66490.4	45079.3	43068.8	49493.9	35843.4		50376.8	66972.6	43371.3	160721		1.16152	1.54417		0.461401	0.00245844
transcript=PF3D7_0719600.1	>PF3D7_0719600.1-p1 | transcript=PF3D7_0719600.1 | gene=PF3D7_0719600 | organism=Plasmodium_falciparum_3D7 | gene_product=60S ribosomal protein L11a, putative | transcript_product=60S ribosomal protein L11a, putative | location=Pf3D7_07_v3:858742-859492(-) | protein_length=173 | sequence_SO=chromosome | SO=protein_coding | is_pseudo=false	8	8	8	8	8	8	8	8	8	8	8	8	96	1.02774e+06	895997	830525	489279	957583	966866	994717	922974	739684	806690	846857	942258		810885	960535	833872	2.60529e+06		0.972433	1.1519		0.860556	0.0518165
transcript=PF3D7_0720800.1	>PF3D7_0720800.1-p1 | transcript=PF3D7_0720800.1 | gene=PF3D7_0720800 | organism=Plasmodium_falciparum_3D7 | gene_product=Ham1-like protein, putative | transcript_product=Ham1-like protein, putative | location=Pf3D7_07_v3:899751-901137(+) | protein_length=198 | sequence_SO=chromosome | SO=protein_coding | is_pseudo=false	14	14	14	14	14	14	14	14	14	14	14	14	168	49910.1	43887.4	43196.4	12774.8	47632.5	17445.2	38325.4	43210.9	46165.1	44700.8	26218.9	43122.9		37442.2	36653.5	40051.9	114148		0.934841	0.91515		0.796604	0.692516
transcript=PF3D7_0719700.1	>PF3D7_0719700.1-p1 | transcript=PF3D7_0719700.1 | gene=PF3D7_0719700 | organism=Plasmodium_falciparum_3D7 | gene_product=40S ribosomal protein S10, putative | transcript_product=40S ribosomal protein S10, putative | location=Pf3D7_07_v3:861583-862487(+) | protein_length=137 | sequence_SO=chromosome | SO=protein_coding | is_pseudo=false	9	9	9	9	9	9	9	9	9	9	9	9	108	430952	358379	434153	314181	391297	387443	413149	386668	369202	376689	343911	318846		384416	394639	352162	1.13122e+06		1.09159	1.12062		0.368967	0.039665
transcript=PF3D7_0720700.1	>PF3D7_0720700.1-p1 | transcript=PF3D7_0720700.1 | gene=PF3D7_0720700 | organism=Plasmodium_falciparum_3D7 | gene_product=phosphoinositide-binding protein, putative | transcript_product=phosphoinositide-binding protein, putative | location=Pf3D7_07_v3:891683-899051(+) | protein_length=2166 | sequence_SO=chromosome | SO=protein_coding | is_pseudo=false	12	12	12	12	12	12	12	12	12	12	12	12	144	221894	264092	301442	300753	223528	261003	237421	254437	275609	258646	266372	283608		272045	244097	271059	787201		1.00364	0.900533		0.962657	0.0428523
transcript=PF3D7_0722200.1	>PF3D7_0722200.1-p1 | transcript=PF3D7_0722200.1 | gene=PF3D7_0722200 | organism=Plasmodium_falciparum_3D7 | gene_product=rhoptry-associated leucine zipper-like protein 1 | transcript_product=rhoptry-associated leucine zipper-like protein 1 | location=Pf3D7_07_v3:946363-948612(+) | protein_length=749 | sequence_SO=chromosome | SO=protein_coding | is_pseudo=false	24	24	24	24	24	24	24	24	24	24	24	24	288	73551.4	91781.7	44890.9	91873.2	74414.1	37311.9	64511.5	89630.9	84729.1	80397.7	83822.1	36186.4		75524.3	66467.1	71283.8	213275		1.05949	0.932428		0.8016	0.774795
transcript=PF3D7_0721100.1	>PF3D7_0721100.1-p1 | transcript=PF3D7_0721100.1 | gene=PF3D7_0721100 | organism=Plasmodium_falciparum_3D7 | gene_product=conserved protein, unknown function | transcript_product=conserved protein, unknown function | location=Pf3D7_07_v3:916434-917168(+) | protein_length=244 | sequence_SO=chromosome | SO=protein_coding | is_pseudo=false	18	18	18	18	18	18	18	18	18	18	18	18	216	2.54683e+06	2792043	2.74657e+06	3091625	2.53258e+06	2483234	2481030	2.80396e+06	2.84012e+06	2.63535e+06	2.45462e+06	2695006		2.79427e+06	2.5752e+06	2.65627e+06	8.02574e+06		1.05195	0.969479		0.359752	0.49275
transcript=PF3D7_0721600.1	>PF3D7_0721600.1-p1 | transcript=PF3D7_0721600.1 | gene=PF3D7_0721600 | organism=Plasmodium_falciparum_3D7 | gene_product=40S ribosomal protein S5, putative | transcript_product=40S ribosomal protein S5, putative | location=Pf3D7_07_v3:931459-932164(-) | protein_length=195 | sequence_SO=chromosome | SO=protein_coding | is_pseudo=false	16	16	16	16	16	16	16	16	16	16	16	16	192	1.93212e+06	1.91497e+06	1.2926e+06	841790	1.64862e+06	1.5832e+06	1.68592e+06	1.7967e+06	1520762	1.55559e+06	1489688	1.39421e+06		1.49537e+06	1.67861e+06	1.49006e+06	4.66404e+06		1.00356	1.12654		0.985298	0.0172568
transcript=PF3D7_0723300.1	>PF3D7_0723300.1-p1 | transcript=PF3D7_0723300.1 | gene=PF3D7_0723300 | organism=Plasmodium_falciparum_3D7 | gene_product=conserved protein, unknown function | transcript_product=conserved protein, unknown function | location=Pf3D7_07_v3:975766-978408(+) | protein_length=880 | sequence_SO=chromosome | SO=protein_coding | is_pseudo=false	4	4	4	4	4	4	4	4	4	4	4	4	48	24800.4	19012.8	12812	24783.3	17772.4	11261.6	16886.7	18657.8	24845.3	13991.3	21829.2	19199.9		20352.1	16144.6	19966.4	56463.2		1.01932	0.808588		0.919885	0.231784
transcript=PF3D7_0723400.1	>PF3D7_0723400.1-p1 | transcript=PF3D7_0723400.1 | gene=PF3D7_0723400 | organism=Plasmodium_falciparum_3D7 | gene_product=conserved Plasmodium protein, unknown function | transcript_product=conserved Plasmodium protein, unknown function | location=Pf3D7_07_v3:978920-983188(-) | protein_length=1422 | sequence_SO=chromosome | SO=protein_coding | is_pseudo=false	13	13	13	13	13	13	13	13	13	13	13	13	156	48645.5	52653.8	27413.5	46775	42021.7	21725	44244.5	27020.1	49064	25858.6	29436.9	41412.8		43872	33752.8	36443.1	114068		1.20385	0.926179		0.375972	0.73911
transcript=PF3D7_0723600.1	>PF3D7_0723600.1-p1 | transcript=PF3D7_0723600.1 | gene=PF3D7_0723600 | organism=Plasmodium_falciparum_3D7 | gene_product=proteasome assembly chaperone 4, putative | transcript_product=proteasome assembly chaperone 4, putative | location=Pf3D7_07_v3:986598-987365(+) | protein_length=149 | sequence_SO=chromosome | SO=protein_coding | is_pseudo=false	1	1	1	1	1	1	1	1	1	1	1	1	12	75120.1	83000.6	71522.9	89003.2	64855.5	65355.3	60747.6	64517.4	16501.3	78935.2	60108.2	63337.4		79661.7	63869	54720.5	198251		1.45579	1.16719		0.158195	0.544007
transcript=PF3D7_0722400.1	>PF3D7_0722400.1-p1 | transcript=PF3D7_0722400.1 | gene=PF3D7_0722400 | organism=Plasmodium_falciparum_3D7 | gene_product=Obg-like ATPase 1, putative | transcript_product=Obg-like ATPase 1, putative | location=Pf3D7_07_v3:954784-956343(+) | protein_length=393 | sequence_SO=chromosome | SO=protein_coding | is_pseudo=false	22	22	22	22	22	22	22	22	22	22	22	22	264	178365	170241	150583	123627	182186	161339	171107	188883	174027	165432	184978	169501		155704	175879	173485	505067		0.897508	1.0138		0.245026	0.758404
transcript=PF3D7_0723900.1	>PF3D7_0723900.1-p1 | transcript=PF3D7_0723900.1 | gene=PF3D7_0723900 | organism=Plasmodium_falciparum_3D7 | gene_product=RNA-binding protein, putative | transcript_product=RNA-binding protein, putative | location=Pf3D7_07_v3:1000701-1004746(-) | protein_length=1222 | sequence_SO=chromosome | SO=protein_coding | is_pseudo=false	9	9	9	9	9	9	9	9	9	9	9	9	108	70887.6	87835	79514.2	92049.8	82792	64182	66874.9	90827.4	83900.4	88640.3	89552.1	66034.8		82571.6	76169.1	82031.9	240773		1.00658	0.92853		0.942782	0.512323
transcript=PF3D7_0724100.1	>PF3D7_0724100.1-p1 | transcript=PF3D7_0724100.1 | gene=PF3D7_0724100 | organism=Plasmodium_falciparum_3D7 | gene_product=conserved Plasmodium protein, unknown function | transcript_product=conserved Plasmodium protein, unknown function | location=Pf3D7_07_v3:1013295-1016449(-) | protein_length=1003 | sequence_SO=chromosome | SO=protein_coding | is_pseudo=false	15	15	15	15	15	15	15	15	15	15	15	15	180	42774.5	40619.1	36516.2	46238.3	45637.6	38727.6	42400.3	38765	46270.2	46064.6	48338.7	41440.1		41537	41382.6	45528.4	128448		0.912332	0.908941		0.166898	0.110307
transcript=PF3D7_0724600.1	>PF3D7_0724600.1-p1 | transcript=PF3D7_0724600.1 | gene=PF3D7_0724600 | organism=Plasmodium_falciparum_3D7 | gene_product=protein kinase, putative | transcript_product=protein kinase, putative | location=Pf3D7_07_v3:1026444-1033077(-) | protein_length=2041 | sequence_SO=chromosome | SO=protein_coding | is_pseudo=false	19	19	19	19	19	19	19	19	19	19	19	19	228	29924.6	25843.2	48548	24635.7	32441.3	29979.2	40526.7	44322.2	39454.3	41585.2	30515	29082.8		32237.9	36817.3	35159.3	104215		0.916909	1.04716		0.667194	0.731083
transcript=PF3D7_0724700.1	>PF3D7_0724700.1-p1 | transcript=PF3D7_0724700.1 | gene=PF3D7_0724700 | organism=Plasmodium_falciparum_3D7 | gene_product=conserved Plasmodium protein, unknown function | transcript_product=conserved Plasmodium protein, unknown function | location=Pf3D7_07_v3:1034969-1046109(-) | protein_length=3489 | sequence_SO=chromosome | SO=protein_coding | is_pseudo=false	8	8	8	8	8	8	8	8	8	8	8	8	96	16633.3	8162.37	11083.5	24174.5	12571.4	22123.7	9244.13	16378	13664	13898.7	3962.91	17801.5		15013.4	15079.3	12331.8	42424.5		1.21746	1.2228		0.581205	0.52189
transcript=PF3D7_0722500.1	>PF3D7_0722500.1-p1 | transcript=PF3D7_0722500.1 | gene=PF3D7_0722500 | organism=Plasmodium_falciparum_3D7 | gene_product=pre-mRNA-splicing factor CWC15, putative | transcript_product=pre-mRNA-splicing factor CWC15, putative | location=Pf3D7_07_v3:956920-958017(-) | protein_length=291 | sequence_SO=chromosome | SO=protein_coding | is_pseudo=false	7	7	7	7	7	7	7	7	7	7	7	7	84	94743.1	105535	87732.1	111688	98878.9	90789	110154	85464.9	116663	108853	106167	92016.7		99924.5	96321.7	105925	302171		0.943351	0.909338		0.45028	0.244207
transcript=PF3D7_0723800.1	>PF3D7_0723800.1-p1 | transcript=PF3D7_0723800.1 | gene=PF3D7_0723800 | organism=Plasmodium_falciparum_3D7 | gene_product=conserved Plasmodium protein, unknown function | transcript_product=conserved Plasmodium protein, unknown function | location=Pf3D7_07_v3:993232-1000233(+) | protein_length=2190 | sequence_SO=chromosome | SO=protein_coding | is_pseudo=false	66	66	66	66	66	66	66	66	66	66	66	66	792	363357	294853	301060	347509	304520	286572	290324	354432	336662	333531	364757	302761		326695	308962	334428	970084		0.976877	0.923852		0.728373	0.254744
transcript=PF3D7_0726500.1	>PF3D7_0726500.1-p1 | transcript=PF3D7_0726500.1 | gene=PF3D7_0726500 | organism=Plasmodium_falciparum_3D7 | gene_product=ubiquitin carboxyl-terminal hydrolase, putative | transcript_product=ubiquitin carboxyl-terminal hydrolase, putative | location=Pf3D7_07_v3:1126556-1136577(-) | protein_length=3183 | sequence_SO=chromosome | SO=protein_coding | is_pseudo=false	34	34	34	34	34	34	34	34	34	34	34	34	408	141592	148142	137669	154619	120070	112236	111844	110827	157527	142237	112688	124130		145505	113744	134145	393395		1.08468	0.847918		0.34522	0.129231
transcript=PF3D7_0727400.1	>PF3D7_0727400.1-p1 | transcript=PF3D7_0727400.1 | gene=PF3D7_0727400 | organism=Plasmodium_falciparum_3D7 | gene_product=proteasome subunit alpha type-5, putative | transcript_product=proteasome subunit alpha type-5, putative | location=Pf3D7_07_v3:1162710-1163831(+) | protein_length=256 | sequence_SO=chromosome | SO=protein_coding | is_pseudo=false	24	24	24	24	24	24	24	24	24	24	24	24	288	2.53964e+06	2.51249e+06	2.45049e+06	2.5299e+06	2.70143e+06	2.71634e+06	2.45889e+06	2.28528e+06	2555582	2.3978e+06	2378810	2557315		2.50813e+06	2.54048e+06	2.47238e+06	7.52099e+06		1.01446	1.02755		0.534457	0.5818
transcript=PF3D7_0728000.1	>PF3D7_0728000.1-p1 | transcript=PF3D7_0728000.1 | gene=PF3D7_0728000 | organism=Plasmodium_falciparum_3D7 | gene_product=eukaryotic translation initiation factor 2 subunit alpha | transcript_product=eukaryotic translation initiation factor 2 subunit alpha | location=Pf3D7_07_v3:1191179-1192289(-) | protein_length=329 | sequence_SO=chromosome | SO=protein_coding | is_pseudo=false	22	22	22	22	22	22	22	22	22	22	22	22	264	644510	613580	576013	531130	682845	690724	716101	750787	659693	643169	639342	705700		591308	710114	661976	1.9634e+06		0.893247	1.07272		0.0575586	0.0672831
transcript=PF3D7_0729400.1	>PF3D7_0729400.1-p1 | transcript=PF3D7_0729400.1 | gene=PF3D7_0729400 | organism=Plasmodium_falciparum_3D7 | gene_product=ribosome biogenesis protein BRX1, putative | transcript_product=ribosome biogenesis protein BRX1, putative | location=Pf3D7_07_v3:1252847-1254097(+) | protein_length=416 | sequence_SO=chromosome | SO=protein_coding | is_pseudo=false	2	2	2	2	2	2	2	2	2	2	2	2	24	65310.6	56150.8	20686.6	59790.9	61913.7	58705	53326.6	55039.7	53943.1	54112.8	53629.3	56537.8		50484.7	57246.3	54555.7	162287		0.925379	1.04932		0.714519	0.260834
transcript=PF3D7_0729900.1	>PF3D7_0729900.1-p1 | transcript=PF3D7_0729900.1 | gene=PF3D7_0729900 | organism=Plasmodium_falciparum_3D7 | gene_product=dynein heavy chain, putative | transcript_product=dynein heavy chain, putative | location=Pf3D7_07_v3:1265910-1281347(+) | protein_length=5065 | sequence_SO=chromosome | SO=protein_coding | is_pseudo=false	1	1	1	1	1	1	1	1	1	1	1	1	12	212629	193430	333113	475436	218079	255212	261688	252675	282829	294759	198120	229354		303652	246914	251265	801831		1.20849	0.98268		0.492513	0.868755
transcript=PF3D7_0730400.1	>PF3D7_0730400.1-p1 | transcript=PF3D7_0730400.1 | gene=PF3D7_0730400 | organism=Plasmodium_falciparum_3D7 | gene_product=IMP1-like protein, putative | transcript_product=IMP1-like protein, putative | location=Pf3D7_07_v3:1304347-1305096(+) | protein_length=158 | sequence_SO=chromosome | SO=protein_coding | is_pseudo=false	4	4	4	4	4	4	4	4	4	4	4	4	48	24277.1	17888.8	23544.9	14886.2	21636	14312.8	23198.4	22991.4	18627.6	18836.2	22824.4	21327		20149.3	20534.6	20403.8	61087.7		0.987524	1.00641		0.922956	0.957799
transcript=PF3D7_0730500.1	>PF3D7_0730500.1-p1 | transcript=PF3D7_0730500.1 | gene=PF3D7_0730500 | organism=Plasmodium_falciparum_3D7 | gene_product=conserved Plasmodium protein, unknown function | transcript_product=conserved Plasmodium protein, unknown function | location=Pf3D7_07_v3:1305894-1314215(-) | protein_length=2773 | sequence_SO=chromosome | SO=protein_coding | is_pseudo=false	12	12	12	12	12	12	12	12	12	12	12	12	144	76667.1	98345.4	83518.5	91466	94966.9	79714.4	81736.2	82293.3	90653.5	85371.1	93531.6	94604.2		87499.2	84677.7	91040.1	263217		0.961107	0.930114		0.528247	0.177631
[truncated: 1,086 more rows]

## Sheet: Fig6A
name	cond1:fc	cond1:pval	cond2:fc	cond:pval
A0A024RA52;P25787	1.09796	0.138173	1.00562	0.961432
A0A087WSW9;A0A087WSY9;A0A182DWI3;E9PIR7;F8W809;Q16881	0.957778	0.707574	1.02681	0.780511
A0A087WUL2;P49720	1.2356	0.370019	0.994294	0.98193
[truncated: 1,111 more rows]

## Sheet: Fig7D
	Ratio of hemozoin (Sybr Green)
[truncated: 8 more rows]

[truncated: 4 more sheets: Fig9A, Fig10, SupFig2A, SupFig2B]
