# Supplementary material for: Genetic and chemical validation of Plasmodium falciparum aminopeptidase PfA-M17 as a drug target in the hemoglobin digestion pathway
Source: eLife. 2022 Sep 13;11:e80813. doi: 10.7554/eLife.80813 (PMC9470162; doi:10.7554/eLife.80813)
Supplement: Source data 2. [file elife-80813-data2.xlsx]

## Sheet: Exp1
				Average relative intensity
Mass	RT	Putative metabolite	Map	M17-HAglmS	M17-HAglmS+GlcN	3D7 WT	3D7+GlcN	3D7+MIPS2571
266.065	22.7573	5'-Oxoinosine		92139.6	79067.9	86784.1	67233.4	120247
194.058	4.75815	Scytalone		98804.3	112181	115552	109145	115318
209.069	4.27874	Hydroxyphenylacetylglycine	Amino Acid Metabolism	433448	362723	339464	407951	373008
306.052	19.014	N-(4-oxoglutaryl)-L-cysteinylglycine		NA	95796.9	NA	NA	32695.7
288.059	12.315	Orotidine		66775.9	66353.5	39450.4	74231.6	52326.2
348.047	15.4568	Inosinic acid	Nucleotide Metabolism	609476	556461	651287	515269	604603
238.107	8.39626	quinonoid dihydro-(6H)-biopterin		17956.9	154390	15210.3	7185.87	75008.8
270.097	14.9919	Aspartyl-Histidine	Peptide	60892.4	154588	72726	37469.2	191479
347.063	13.5373	2'-Deoxyguanosine 5'-monophosphate	Nucleotide Metabolism	9.43628e+06	3.46793e+06	9.00456e+06	5.25652e+06	9951957
363.058	16.8669	Guanosine 3'-phosphate	Nucleotide Metabolism	276853	172056	230670	130443	335877
339.074	17.2342	glutathione sulfinate		81505.2	55939.5	68023.3	79069	64828.9
427.029	15.2315	ADP	Energy Metabolism	290139	386542	324251	284432	454618
269.112	12.7345	Asparaginyl-Histidine	Peptide	156062	274410	131271	74398.1	431157
274.117	11.1057	Hydroxyprolyl-Proline		NA	110512	NA	NA	NA
244.106	15.0605	Glutamylproline	Peptide	3.5731e+06	4.81161e+07	1.0672e+06	595822	1.55684e+07
276.096	13.9194	Glutamylglutamic acid	Peptide	280038	9.27648e+06	95919	106494	390679
256.117	11.3174	Threoninyl-Histidine	Peptide	50049.7	315747	27603.7	13408.3	281972
232.095	15.4937	Glycerol 1-propanoate diacetate		132477	255823	33645.3	27573.4	103439
243.122	12.6115	Ala/Gly/Pro	Peptide	185585	1.03059e+06	140585	90698.6	684211
275.094	9.77171	Cys/Gly/Pro	Peptide	46761.3	47758	32748.6	62117.7	44015.4
275.112	15.3784	N2-gamma-Glutamylglutamine	Peptide	36651.4	198436	21994.5	11606	118318
307.084	14.322	Glutathione	Amino Acid Metabolism	4.04392e+06	2764957	3.80735e+06	4.45941e+06	4.32709e+06
211.114	9.38046	Pramipexole		38897.2	89127.4	NA	NA	93220.3
231.111	13.3876	N-(3-oxohexanoyl)-L-homoserine		20951.7	152184	12119.7	1665.08	72001.8
214.132	8.56527	Dethiobiotin	Metabolism of Cofactors and Vitamins	714206	886832	478192	302915	1.73944e+06
246.104	8.38232	9-mercaptodethiobiotin	Metabolism of Cofactors and Vitamins	68853.7	64009.1	40828.1	41243.4	104122
246.121	12.1229	beta-aspartyl-L-leucine	Peptide	99082.1	555571	81859.7	51400.8	637912
170.131	4.13831	2-Exo-hydroxy-1,8-cineole	Biosynthesis of Secondary Metabolites	132726	102586	154274	124446	135915
245.137	9.05259	Isoleucyl-Asparagine	Peptide	257462	1.22285e+06	179714	103024	1.08708e+06
261.132	16.4098	Gamma glutamyl ornithine	Peptide	38577.1	89270.7	28764.9	22709.3	33714.3
216.147	7.49377	Valyl-Valine	Peptide	104256	1.50112e+06	52770.2	NA	1.24742e+06
248.119	6.5034	Methionyl-Valine	Peptide	NA	251053	NA	NA	74252.5
232.142	7.49669	Isoleucyl-Threonine	Peptide	1.0443e+06	1.72468e+06	893943	463395	3.38733e+06
260.148	16.2994	Lysyl-Asparagine	Peptide	100708	29325.8	105683	56967.6	268692
288.154	16.2599	Asparaginyl-Arginine	Peptide	42298.3	19103.9	30293.4	20886	104925
172.146	4.0159	Capric acid	Lipid Metabolism	668254	551188	920632	876538	958181
247.153	15.5615	Lysyl-Threonine	Peptide	86732	183046	75225.2	42860.3	423840
275.159	15.3749	Threoninyl-Arginine	Peptide	38431.6	4935.31	35229.1	23776.5	118478
240.067	3.76515	Tryptophan	Amino Acid Metabolism	131058	185533	198219	197400	180530
239.079	4.76236	2-{[(3,5-dimethoxyphenyl)(hydroxy)methylidene]amino}acetic acid		219684	171664	196555	194603	169766
222.1	7.49418	Phenylalanyl-Glycine	Peptide	120389	2.22447e+06	145695	NA	736540
242.079	7.46557	Genipinic acid		102954	111907	249522	355482	116674
297.089	7.52645	5'-Methylthioadenosine	Amino Acid Metabolism	221447	246330	77220.8	44452.9	246428
225.1	4.31665	2-amino-3-(4-hydroxy-3-methoxyphenyl)-2-methylpropanoic acid		207439	158451	161823	187953	173046
335.041	15.1455	nicotinate beta-D-ribonucleotide	Metabolism of Cofactors and Vitamins	149079	197516	120275	121731	136299
306.108	6.56764	(citryl)-N-(3-aminopropyl)-N-hydroxyacetamide		2.56811e+06	3.40336e+06	5.7133e+06	4.26353e+06	5.13665e+06
252.122	12.0661	Prolyl-Histidine	Peptide	132818	281837	74608	42673.2	480218
284.112	14.7777	Glutamylhistidine	Peptide	78598.9	330189	75986.7	38598.8	292774
283.128	11.9129	Ala/Gly/His	Peptide	46936.6	68858.3	42115.2	27480.3	107753
291.095	12.8876	2,7-Anhydro-alpha-N-acetylneuraminic acid		112883	86811.6	101719	104340	104886
306.089	10.7811	gamma-Glutamyl-S-(1-propenyl)cysteine sulfoxide		29984.4	93316.2	6080.17	18547.3	13448
254.138	9.07113	Valyl-Histidine	Peptide	243707	1.36919e+06	169099	91470.3	1.68047e+06
305.122	14.6247	Glu/Ala/Ser	Peptide	100388	70092.1	79850.7	72960.3	94847.8
261.121	12.4011	Heterodendrin		167838	140107	145520	160451	151701
228.147	7.50312	Isoleucylproline	Peptide	542971	367392	455525	249663	1.23604e+06
260.137	10.7618	gamma-Glutamylisoleucine	Peptide	143053	494270	130347	99142.1	458571
430.065	14.9679	CMP-2-aminoethylphosphonate	Amino Acid Metabolism	69271.9	66708.1	47071.6	54118.6	62004.7
446.06	16.2618	CDP-Ethanolamine	Lipid Metabolism	427461	205760	356941	291637	403808
312.107	13.5017	Serotinose		18968.4	300810	NA	NA	25568.9
184.146	4.06767	xi-gamma-Undecalactone		287504	148387	326360	273135	378430
243.158	15.2739	Lysyl-Proline	Peptide	1.45125e+06	8573379	377510	242578	3.50386e+06
355.069	18.6613	Met/Cys/Cys	Peptide	352025	227896	322712	387837	280409
343.115	15.2851	Thr/Thr/Ser	Peptide	29882.5	121564	6135.99	3422.1	55366.3
271.164	15.3478	Prolyl-Arginine	Peptide	66251	168062	40565.7	29403.6	163645
230.163	6.49129	Isoleucyl-Valine	Peptide	245755	1.88927e+06	203931	110981	1.18598e+06
186.162	3.99636	Undecanoic acid	Lipid Metabolism	203810	135498	268961	223675	277922
245.174	13.3998	Lysyl-Valine	Peptide	479951	1.20571e+06	280327	163673	2.20248e+06
273.18	13.3146	Valyl-Arginine	Peptide	84937	26313.5	69618.3	36055.2	260488
233.07	13.1372	6-(2-aminophenyl)-2-hydroxy-6-oxohexa-2,4-dienoate		446531	450478	451324	443436	472609
220.074	22.7438	2,6-Dioxo-6-phenylhexanoate		126126	98083.3	120207	94377.1	157660
292.128	11.5192	Histidinyl-Histidine	Peptide	88691.3	215341	90295.7	45904	378654
255.11	4.75659	N-D-Glucosylarylamine		98516.4	115540	98919.9	106001	88636.8
238.132	4.66927	Secobarbital		471978	461356	457797	294149	460451
301.127	14.771	Ala/Asp/Pro	Peptide	121085	3.15282e+06	63732.5	51526.4	442714
317.122	12.8919	Asp/Pro/Ser	Peptide	68058.5	373413	13556.6	11574.2	53926.9
268.153	7.63642	Histidinyl-Leucine	Peptide	93031.1	222738	62988.6	47060.6	242712
300.143	12.5042	Ala/Asn/Pro	Peptide	16737.3	397694	NA	NA	64660.5
287.148	15.2396	Thr/Ala/Pro	Peptide	114051	685242	31465.3	21899.8	269726
283.164	15.5104	Lysyl-Histidine	Peptide	260525	543764	163005	106035	1.1197e+06
211.157	27.955	Elaeokanine C		122309	146797	138477	135075	140121
277.117	12.0764	(2-Methylpropionyl)-dihydrolipoamide-E		115062	150683	97056.2	90616.3	102903
259.189	12.2235	Isoleucyl-Lysine	Peptide	160254	34295.7	147782	80113.1	449141
266.155	3.69545	sodium dodecyl sulfate		2.48347e+06	1.51809e+06	3.22227e+06	2.43644e+06	2.01176e+06
266.164	3.93174	Tributyl phosphate		322692	409700	262886	231504	176054
261.111	8.26676	Tryptophyl-Glycine	Peptide	NA	88106.9	NA	NA	26515.1
280.106	11.0714	Phenylalanyl-Aspartate	Peptide	77142.5	484474	64211.4	35365.7	623318
296.1	14.4452	4-Nitrophenyl-3-ketovalidamine		43371.7	27384.5	42101.5	24563.1	119022
266.127	7.49586	Phenylalanyl-Threonine	Peptide	116232	4.46715e+06	NA	NA	949006
282.121	10.0194	Threoninyl-Tyrosine	Peptide	7030.45	94379.4	NA	NA	45136.2
295.164	14.2739	N-Benzoyl-D-arginine		35724.3	66755.6	18288.6	6834.66	129611
326.122	13.1297	6,7-Dimethyl-8-(1-D-ribityl)lumazine	Metabolism of Cofactors and Vitamins	223419	117054	224843	162887	245420
224.141	4.20663	Vomifoliol		140901	61362.3	76209.5	142108	130577
240.136	3.9201	avenolide		190534	194056	417059	381614	349366
315.143	14.6688	Glu/Ala/Pro	Peptide	76676.4	3.12457e+06	40553.2	38952.5	367876
347.133	16.6183	Glu/Ala/Glu	Peptide	110163	983799	77678.1	58597.6	248483
301.152	5.93123	Etamiphylline		512684	398242	812694	613458	806498
346.149	13.6275	Ala/Ala/Ala/Asp	Peptide	9476.67	755708	NA	NA	157764
303.106	14.0828	Fenamiphos		30763.3	128906	2743.35	2452.73	36755.5
317.158	10.8311	Glu/Ala/Val	Peptide	88664.4	830622	35751.4	33342.7	293838
333.154	11.4413	Glu/Ser/Val	Peptide	80540.2	622974	58976.6	43542.5	126876
212.178	3.96363	Isotridecenoic acid	Lipid Metabolism	140699	50638	185558	113167	178937
243.183	4.37457	N-Undecanoylglycine		164946	188701	209974	183987	193664
214.193	3.88179	FA methyl(12:0) dodecanoic acid	Lipid Metabolism	196377	162069	308139	202154	235454
322.116	9.17453	N-lactoyl-Tryptophan		NA	331444	NA	NA	54247.5
280.095	4.16382	Gravolenic acid		474096	514226	451078	553276	518975
383.107	14.5814	Succinyladenosine		113896	25670.7	55566.6	51601.6	66279.5
246.137	8.32804	Lenticin		103973	98721.1	53420.3	129378	80034.4
278.126	10.0252	N1-(alpha-D-ribosyl)-5,6-dimethyl-benzimidazole	Metabolism of Cofactors and Vitamins	31258.8	32387.7	25835.5	14429.3	95328.9
310.117	13.8639	gamma-Glutamyltyrosine	Peptide	73950.8	88926.3	65825.3	29717.1	293218
266.115	4.64116	3',4',5'-Trimethoxycinnamyl alcohol acetate		991884	1.20458e+06	1.02834e+06	1.14762e+06	1.18023e+06
342.154	8.621	Gly/Ser/Tyr	Peptide	54736.4	51037.6	48543.7	39673.7	54203.5
280.142	7.50174	Valyl-Tyrosine	Peptide	187803	189567	102741	NA	830928
384.121	13.0178	Adenosylhomocysteine	Amino Acid Metabolism	99461.1	93313.7	82384.7	78371.4	73997.3
284.126	5.42642	2-Phenylethyl beta-D-glucopyranoside		1.08886e+06	849619	1.5155e+06	1.08559e+06	1.49285e+06
347.122	6.53468	Dide-O-methylsimmondsin		39883.3	44885.5	73512.9	45130.8	74020.2
358.149	15.6926	Ala/Asp/Gly/Pro	Peptide	22524.3	356406	13696.7	9311.68	91945.1
222.162	3.90468	Rishitin		798891	569054	1.17181e+06	1.70382e+06	1.47053e+06
329.159	12.7583	Val/Asp/Pro	Peptide	1949.35	181233	NA	NA	25166.5
361.148	16.1606	Ile/Asp/Asp	Peptide	42511.6	392914	16412.6	16516.8	148312
328.174	9.82747	Ala/Ala/Ala/Pro	Peptide	99366.3	908534	52110.2	44269.8	406332
488.108	15.0117	Citicoline	Lipid Metabolism	111947	93980.3	93919	78143.3	118348
472.113	13.847	CMP-N-trimethyl-2-aminoethylphosphonate	Lipid Metabolism	106581	82935.3	83369.9	80242.1	79523.3
228.209	3.82936	Myristic acid	Lipid Metabolism_Fatty Acyls [FA]	1.6922e+06	1.66909e+06	2.2381e+06	1.89017e+06	1.73352e+06
256.121	4.47801	ancymidol		112911	111985	123983	138243	116218
302.138	7.53638	Phenylalanyl-Histidine	Peptide	57195.2	581139	25560.6	NA	244417
318.132	9.81403	Tryptophyl-Asparagine	Peptide	17027.6	80335.9	NA	NA	75013
310.105	4.09427	1-O-Cinnamoyl-beta-D-glucose		231912	215592	232008	328547	269203
541.06	13.6795	Cyclic ADP-ribose		760966	763252	646448	594387	756307
373.148	17.1882	Glu/Glu/Pro	Peptide	165305	3.81202e+06	54088.6	43672.5	788114
369.165	12.5964	Val/Asp/His	Peptide	30506.1	467193	15564.4	9063.83	88054.7
398.137	16.3182	Adenosylmethionine	Amino Acid Metabolism	54826.4	123423	24178.5	40000.5	80308.3
566.055	16.6961	Uridine diphosphate glucose	Carbohydrate Metabolism	169539	191536	167032	123720	207150
387.176	4.44879	Ala/Asn/Pro/Ser	Peptide	8.17842e+06	8.25683e+06	7.97861e+06	11839811	8.53831e+06
342.19	9.32735	Ala/Val/Gly/Pro	Peptide	324580	1.57509e+06	150119	125139	683419
390.174	14.9568	Ala/Val/Asp/Ser	Peptide	4340.74	89048.7	NA	NA	27689
445.11	16.411	Glu/Met/Met	Peptide	1787.89	41208.9	NA	NA	11267.5
242.225	3.81161	FA methyl(14:0)	Lipid Metabolism	628388	585739	867555	790001	657425
356.099	14.0772	Bay-K-8644		NA	94417.1	NA	89106.7	NA
268.121	4.16836	Lysergic acid		407080	477752	473420	630206	455222
268.103	11.9848	2-p-Tolyl-5,6,7,8-tetrahydrobenzo[d]imidazo[2,1-b]thiazole		23757.3	99650.2	7753.21	NA	115141
315.104	10.1288	(1R*,3R*,3'S*)-1,2,3,4-Tetrahydro-1-(2-thio-3-pyrrolidinyl)-beta-carboline-3-carboxylic acid		17366	86760	NA	NA	110999
286.131	6.51617	Pilosine		465647	341819	671944	429745	642542
301.142	8.56482	Prolyl-Tryptophan		494608	5.49478e+06	264614	183911	4.43975e+06
317.137	9.15871	Hydroxyprolyl-Tryptophan		59706.7	357725	29968.3	19724	372220
285.129	5.22802	Isothipendyl		206380	188086	286477	192217	247818
280.167	3.90325	Prehumulinic acid		182138	9051.67	243194	309186	205447
383.18	10.8567	Asn/Gly/Pro/Pro	Peptide	105379	659539	69336.4	44961	108537
298.16	3.70834	2-(4-sulfophenyl)decane		1.19825e+06	859283	1.21605e+06	1.46371e+06	1.27463e+06
330.168	4.52697	dihydroxy-15-oxo-2,3,4,5-tetranor-prostan-1,20-dioic acid	Lipid Metabolism	87311.6	9089.01	101836	132821	79093.6
388.179	4.3246	Ala/Met/Ala/Pro	Peptide	1.55668e+06	1.84712e+06	1.73953e+06	1.86863e+06	1.49741e+06
374.216	13.8423	Ala/Leu/Thr/Ala	Peptide	146234	96203.1	139651	117281	134239
254.225	3.79898	Hypogeic acid	Lipid Metabolism_Lipid Metabolism	426611	323130	736397	663480	400057
270.219	3.83509	FA oxo(16:0)	Lipid Metabolism	143411	124318	141633	135396	129850
405.205	5.62568	Ala/Lys/Met/Gly	Peptide	923112	1.32199e+06	1.19173e+06	1.71914e+06	1502099
256.24	3.78151	Palmitic acid	Lipid Metabolism_Fatty Acyls [FA]	26373240	28386794	3.1482e+07	3.02615e+07	2.70496e+07
272.235	3.7955	2-Hydroxyhexadecanoic acid	Lipid Metabolism	294085	220780	242043	286204	188090
276.222	28.8699	2-chlorohexadecanol	Lipid Metabolism	437030	417004	454869	440241	418272
294.183	3.89603	Phytuberin		8.46066e+06	5.22026e+06	1.30759e+07	19632416	1.73162e+07
310.178	3.89669	Botrydial	Lipid Metabolism	490099	290618	659946	770854	771280
607.082	15.268	Uridine diphosphate-N-acetylglucosamine	Carbohydrate Metabolism	121451	1.23658e+06	97956.7	862434	126697
416.191	9.55565	Asp/Val/Pro/Ser	Peptide	434332	403099	386570	295327	397735
312.176	3.68858	N-Undecylbenzenesulfonic acid		4645507	3482334	4.13957e+06	4661127	4.6822e+06
399.211	9.51715	Ala/Val/Asn/Pro	Peptide	34630	62297.6	22555.2	15265.2	139082
356.242	20.7747	Ile/Lys/Pro	Peptide	245562	211861	199458	224365	223489
268.24	3.77539	FA methyl(16:1)	Lipid Metabolism	160044	116898	194985	191604	132564
270.256	3.76106	Heptadecanoic acid	Fatty Acyls [FA]_Lipid Metabolism	1.02881e+06	856405	991593	1.06519e+06	1.10307e+06
318.065	16.0004	Melanin	Amino Acid Metabolism	228326	213917	198581	196335	206742
290.188	3.79828	Athanacalvic acid	Fatty Acyls [FA]_Lipid Metabolism	67435	110831	46716.7	71934.4	78507.4
475.192	16.1912	Ala/Glu/Gln/Glu	Peptide	16417.4	97135.4	NA	NA	84627.1
278.225	3.76717	Alvaradoic acid	Biosynthesis of Secondary Metabolites_Fatty Acyls [FA]_Lipid Metabolism	320557	262801	328415	254626	285894
326.191	3.66948	2-Dodecylbenzenesulfonic acid		4.86879e+06	3.88311e+06	4.50619e+06	5.40785e+06	4806894
413.227	8.92281	Ala/Leu/Asn/Pro	Peptide	73955.9	125794	52532.3	29594.8	145201
214.611	14.5938	Asn/Leu/Pro/Ser	Peptide	436065	763524	245124	168313	1.32462e+06
280.24	7.37937	octadecadienoic acid	Fatty Acyls [FA]_Lipid Metabolism	260956	283388	291478	299525	272639
455.193	14.9575	PS(12:0)	Lipid Metabolism	68932.2	648757	17603.4	11538.7	256029
282.256	4.11936	Oleic acid	Fatty Acyls [FA]_Lipid Metabolism	4.1284e+06	2.32766e+06	4.56971e+06	3.87058e+06	3.54531e+06
298.251	3.79299	3-Oxooctadecanoic acid	Fatty Acyls [FA]_Lipid Metabolism	297409	239760	282026	306176	244839
284.271	3.74553	Stearic acid	Lipid Metabolism_Fatty Acyls [FA]	1.97959e+07	2.01367e+07	2.33259e+07	2.22762e+07	2.18464e+07
300.266	3.78174	2-Hydroxystearic acid	Fatty Acyls [FA]_Lipid Metabolism	372932	245306	247371	332715	226579
301.298	7.54033	Sphinganine	Lipid Metabolism	225581	163670	178162	104447	194424
381.264	7.52749	Sphinganine 1-phosphate	Lipid Metabolism	191596	264304	127589	210859	123383
354.056	7.49589	Phenolsulfonphthalein	Medium Component	12372357	12189840	10488240	1.09423e+07	10780284
417.165	10.9253	Phe/Asp/His	Peptide	4813.05	409180	NA	NA	92249.4
296.189	3.89155	Antirhine		244611	127175	291503	454383	383296
438.175	11.0602	Ala/Ala/Asp/Tyr	Peptide	88918.7	82847.5	71159.5	46923.1	95784.2
484.192	15.669	Ala/Glu/Glu/His	Peptide	906049	2.92097e+06	671503	363445	2.03786e+06
402.19	8.17932	Methyl 7-epi-12-hydroxyjasmonate glucoside		33260.7	630817	15313.3	16756.3	342876
350.243	30.7681	19-hydroxy-1,1,1-trifluoro-10(Z)-nonadecen-2-one		481130	596075	562595	497657	526827
312.267	3.73913	FA oxo(19:0)	Lipid Metabolism	115802	113404	93040	98744.6	108190
402.19	8.17574	Thr/Trp/Pro	Peptide	23825.3	430050	NA	NA	239200
496.192	14.367	Asn/Asn/Ser/Tyr	Peptide	33856.8	97186.8	23366.4	13692.5	69943.4
302.225	3.83999	Retinyl ester		201089	219820	189784	160329	177531
612.152	17.5089	Oxidized glutathione	Amino Acid Metabolism	1.05882e+06	575737	639727	735866	785410
304.24	3.77067	6,10,14,18-eicosatetraenoic acid	Fatty Acyls [FA]_Lipid Metabolism	535231	389989	497676	403175	460286
439.243	10.2663	Asn/Leu/Pro/Pro	Peptide	63233.1	168070	33208.8	40206.8	128236
306.256	3.77976	Eicosatrienoic acid	Lipid Metabolism	211470	219245	227541	195399	180665
312.303	3.7367	Arachidic acid	Fatty Acyls [FA]_Lipid Metabolism	347544	376179	389617	399192	345585
664.093	14.1396	Nicotinic acid adenine dinucleotide	Metabolism of Cofactors and Vitamins	95052.9	88832.2	106677	99460.8	115005
663.109	13.4332	Fenugreekine		3.12748e+06	3.17954e+06	2.64695e+06	2.51204e+06	3.14088e+06
331.554	13.6914	NAD	Energy Metabolism	2.38346e+06	2.35957e+06	1.99724e+06	1.81404e+06	2.41404e+06
743.076	16.9035	NADP	Energy Metabolism	98765.7	92825.5	100836	83068	125629
501.243	16.2809	Pro/Pro/Ser/Thr/Thr	Peptide	77401.5	128527	41248.8	25097.3	196624
489.316	13.8457	Ala/Ile/Ile/Lys	Peptide	2.40389e+06	2.38777e+06	2.17044e+06	1.91802e+06	2437758
453.286	4.68542	sn-glycero-3-phospho-N-(palmitoyl)ethanolamine		188794	85345.6	183918	155508	184607
386.173	4.69187	3,5-Di-O-methyl-8-prenylafzelechin-4beta-ol	Lipid Metabolism	27855558	23629176	2.87328e+07	4.47595e+07	3.60909e+07
404.183	4.16842	Eupatocunin		560226	609944	604525	818825	536111
403.199	4.07851	20-hydroxy-fusarin		88981792	9.10388e+07	8.63804e+07	9.59707e+07	94130648
462.211	10.7684	Glu/Phe/Ala/Pro	Peptide	20428.5	83649.2	6978.18	2399.1	70434.8
330.256	3.75999	Docosapentaenoic acid (22n-6)	Lipid Metabolism	344576	218561	400674	286384	312446
412.246	4.07854	Grayanotoxin I		198310	43302.4	338115	392103	346399
470.274	15.0738	Glu/Ile/Ile/Pro	Peptide	NA	94185.6	NA	NA	33685
484.28	3.79907	1-hexadecanoyl-sn-glycero-3-phospho-(1'-sn-glycerol)	Lipid Metabolism	312050	89403	360243	237359	292157
388.125	16.0405	Sulfinpyrazone sulfide		113376	64709.1	130837	99151.7	139289
430.163	4.09268	Aliarin 4'-methyl ether	Lipid Metabolism	1.95818e+06	2.06355e+06	2.28117e+06	3.0881e+06	2.77047e+06
404.202	4.18981	15beta-Hydroxy-7alpha-mercapto-pregn-4-ene-3,20-dione 7-acetate		21317090	2.2699e+07	2.0939e+07	23798306	20625662
475.243	7.49669	Ala/Leu/Trp/Ser	Peptide	2.11549e+06	4925391	1.36544e+06	641293	8.8074e+06
521.242	3.87894	Arg/Phe/Cys/Pro	Peptide	219703	204251	265888	279152	267114
584.237	17.2155	Cys/His/Pro/Gln/Thr	Peptide	NA	112104	NA	NA	23274.9
529.275	7.49589	Ala/Glu/Ile/Pro/Thr	Peptide	6.51542e+06	2.66273e+06	6.31416e+06	4.37202e+06	4.66743e+06
496.3	28.8123	Gly/Lys/Pro/Pro/Val	Peptide	223575	290040	235582	240432	248893
302.109	8.1669	Dibenzo[a,l]pyrene		43775.8	96074.6	15108.1	NA	97927.2
441.178	15.4942	platensimycin		113583	215257	26094.5	23355.5	94544.2
440.194	13.3332	Diferuloylputrescine		32187.4	254809	6349.45	NA	115103
514.218	11.329	Asp/Phe/Pro/His	Peptide	31954.8	179137	4816.84	NA	283734
390.277	3.8015	9'-Carboxy-alpha-chromanol		918339	1.01085e+06	769258	748527	745225
558.3	28.7681	Ala/Asp/Ile/Ile/Gln	Peptide	176377	217668	171236	182567	183819
510.295	3.78527	1-(octadecenoyl)-sn-glycero-3-phospho-(1'-sn-glycerol)	Lipid Metabolism	200550	49568	274805	163118	225173
512.311	3.75282	1-Stearoylglycerophosphoglycerol	Lipid Metabolism	578607	199579	671799	397859	610663
495.333	4.68697	PE(19:0)	Lipid Metabolism	201814	169552	127510	128562	147300
530.248	7.98483	Asp/Leu/Phe/His	Peptide	30280.6	100749	9906.62	7609.21	99202.3
472.269	7.52427	Ile/Phe/Pro/Pro	Peptide	195057	268770	160299	144009	209481
468.272	4.05017	methyl dihydroxy-11R,18-diacetoxy-prostadienoate	Lipid Metabolism	201836	23171.4	262368	313177	231404
427.366	4.38336	Stearoylcarnitine		255489	309115	204733	270748	197327
618.363	14.9031	Gly/Lys/Lys/Met/Arg	Peptide	39498.2	160103	15844.1	24791.2	54485.2
590.234	6.52197	Ala/Ala/Asp/Glu/Trp	Peptide	1.1349e+06	481885	1.44109e+06	742786	1.52014e+06
550.313	16.047	Ile/Lys/Gln/Tyr	Peptide	110098	106627	112257	108194	116150
558.151	13.52	Sulforhodamine B		701314	262236	695290	378091	687116
466.311	3.61042	Cholesterol sulfate	Lipid Metabolism	466071	456007	430383	463060	428061
612.341	4.29632	Cys/His/Ile/Ile/Lys	Peptide	413288	444029	437142	496439	504242
541.062	13.6546	GW 4064		497938	543195	459706	395672	517866
410.318	3.81701	epsilon-Tocopherol		449594	414111	358905	384619	445323
488.313	15.667	[ST (12:0) homo-seco-cholestatrien-tetrol	Lipid Metabolism	654815	1.44546e+06	498189	505421	948650
557.333	4.64925	Lys/Lys/Trp/Pro	Peptide	212852	206185	159220	187394	190041
580.283	29.0051	castasterone 22-O-sulfate		101339	108661	100598	103020	117806
475.244	7.50599	Fluspirilene		604876	1.1787e+06	278443	174742	2.19522e+06
428.366	3.81487	4alpha-Hydroxymethyl-4beta-methyl-5alpha-cholesta-8,24-dien-3beta-ol		192505	180922	181991	195927	201934
139.978	18.7335	Sulfoacetate	Amino Acid Metabolism	106032	112255	104394	107268	105203
125.999	10.9987	2-Hydroxyethanesulfonate	Amino Acid Metabolism	199484	198203	104105	237745	159161
141.985	29.2763	Dimethylthiophosphate		1.0249e+06	1.68692e+06	1.27063e+06	1.22534e+06	1.35559e+06
141.019	15.6343	O-Phosphoethanolamine	Amino Acid Metabolism	322097	494397	269720	298346	290195
600.327	7.49589	Lys/Lys/Tyr/Tyr	Peptide	1.0795e+06	430464	859308	533818	994827
531.432	5.31633	Didodecyl thiobispropanoate		834061	674142	707357	885934	912857
685.27	3.76454	Asp/Phe/Asn/Gln/Tyr	Peptide	775395	652903	685310	738744	677072
482.34	3.64729	Adlupone		468668	465714	417209	442599	454378
634.134	17.5305	actinorhodin		30120.9	14218.2	12994.6	19750	18811
713.301	3.78528	Glu/Phe/Gln/Gln/Tyr	Peptide	1.4229e+06	1.08219e+06	1.2237e+06	1.2753e+06	1.19804e+06
731.407	3.71186	Asp/Lys/Lys/Arg/Trp	Peptide	250194	250656	255867	317406	302469
570.272	3.41089	Pipercyclobutanamide A		199093	209686	191983	183862	192002
537.512	3.93491	N-Palmitoylsphingosine	Lipid Metabolism	493216	506581	437437	409370	417806
741.332	3.81672	Phe/Lys/Met/Met/Trp	Peptide	1.45968e+06	1.03088e+06	1.24868e+06	1.32617e+06	1.24656e+06
672.473	3.62188	PA(16:0/18:2)	Lipid Metabolism	273424	263464	242000	267900	249915
611.548	3.70695	DG(18:1/16:0/0:0)	Lipid Metabolism	1781404	1.99768e+06	1.29034e+06	1.45571e+06	1.4718e+06
674.488	3.63851	PA(16:0/18:1)	Lipid Metabolism	682227	536464	592966	633652	568395
689.5	4.12623	PC(29:1)	Lipid Metabolism	196656	154569	245629	164886	198471
691.514	3.68126	PC(29:0)	Lipid Metabolism	106488	85721.4	95845.2	98211.2	90244.2
656.429	3.74346	Armillatin		1.07369e+06	200234	1.67008e+06	1.62399e+06	1.53262e+06
705.53	3.89901	PC(14:0/16:0)	Lipid Metabolism_Glycerophospholipids [GP]	519507	337817	524834	429553	526850
696.473	3.63079	PA(16:0/20:4)	Lipid Metabolism	207839	175176	162053	173270	177667
713.499	3.92296	PE(18:2/16:1)	Lipid Metabolism	358397	307899	470932	371824	462120
700.503	3.60702	PA(18:0/18:2)	Lipid Metabolism	285605	264636	228451	250316	233138
715.517	4.85475	PE(16:1/18:1)	Lipid Metabolism	363371	310874	386915	337810	417160
639.579	5.76809	DG(18:1/18:0/0:0)	Lipid Metabolism	171586	193917	135869	161761	155278
717.531	5.69331	PE(18:0/16:1)	Lipid Metabolism	732842	551641	694343	632819	729539
702.567	4.10343	SM(d34:1)	Lipid Metabolism	1.42441e+06	1.25369e+06	1.25781e+06	1.28429e+06	1.36555e+06
167.982	18.3237	Phosphoenolpyruvic acid	Carbohydrate Metabolism	25982.6	103605	22452.1	27549.6	19831.1
90.0316	9.53481	Lactic acid	Carbohydrate Metabolism	282017	411177	294479	378289	208730
89.0476	14.3738	Alanine	Amino Acid Metabolism	89390.9	72371.6	48729.8	107208	70964.5
105.043	15.6142	Serine	Amino Acid Metabolism_Lipid Metabolism	215217	157066	155295	234035	206837
185.993	17.4429	2-Hydroxy-3-(phosphonatooxy)propanoate	Carbohydrate Metabolism	33560.3	183656	35975.2	43168.8	36035.2
92.0294	3.75917	mercapto-2-propanol		33742.1	29655.5	23665.7	14369.3	25100
172.014	14.816	Glycerol 3-phosphate	Lipid Metabolism	314910	483531	148519	232310	122784
759.505	3.63862	PS(18:2/16:0)	Lipid Metabolism	597624	383970	507004	467474	518214
746.51	3.57465	PG(34:2)	Lipid Metabolism	694739	664279	679646	513740	774940
761.521	3.6321	PS(16:1/18:0)	Lipid Metabolism	2.80375e+06	1.90743e+06	2.43511e+06	2.09011e+06	2.39847e+06
748.525	3.57158	PG(34:1)	Lipid Metabolism	2.39348e+06	2.30058e+06	2.08913e+06	1.69984e+06	2.54156e+06
731.545	3.88695	PC(14:0/18:1)	Lipid Metabolism_Glycerophospholipids [GP]	1489634	1.22554e+06	1.35967e+06	1.21456e+06	1.42124e+06
621.606	4.25539	Cer(d18:0/22:1)	Lipid Metabolism	183363	174052	174495	182616	197351
733.561	5.34413	PE(20:0/15:0)	Lipid Metabolism_Glycerophospholipids [GP]	1.14677e+06	865422	1.04082e+06	826085	948173
789.371	4.09791	Gly/Arg/Trp/Trp/Trp	Peptide	35503234	3.65127e+07	30651563	48772892	44874886
737.498	3.97941	PE(18:1/18:4)	Lipid Metabolism	512245	494443	532401	456754	555322
723.521	4.0536	PE(18:3/P-18:1)	Lipid Metabolism	228165	228256	223954	242601	267980
739.515	3.86954	PE(14:0/22:4)	Lipid Metabolism	1.09242e+06	1.00657e+06	1.09747e+06	1.10511e+06	1.14732e+06
760.58	4.23331	Termitomycesphin A	Lipid Metabolism	5.58259e+06	5.5437e+06	5659375	4.95068e+06	5.64284e+06
764.512	3.70346	PA(16:0/22:2)		506875	463765	514214	538348	566558
743.547	3.9691	PE(18:1/18:1)	Lipid Metabolism	454821	472551	491317	493647	525085
745.561	4.20379	PE(18:0/18:1)	Lipid Metabolism	481332	458465	465615	486537	465295
783.504	3.63198	PS(18:3/18:1)	Lipid Metabolism	1.16695e+06	881729	1.07729e+06	995897	1.06511e+06
785.52	3.63116	PS(18:1/18:2)	Lipid Metabolism	1.41183e+06	1.04247e+06	1.21633e+06	1.02656e+06	1.32186e+06
787.536	3.62384	PS(18:1/18:1)	Lipid Metabolism	4130652	3.09989e+06	3.37694e+06	3.16571e+06	3.77152e+06
774.541	3.55879	PG(18:0/18:2)	Lipid Metabolism	1.91055e+06	1.73026e+06	1.72347e+06	1.35005e+06	2.08175e+06
789.551	3.62627	PS(18:1/18:0)	Lipid Metabolism	7.2033e+06	5806840	5.80183e+06	5.50916e+06	6.35138e+06
757.56	5.14541	PC(16:1/18:1)	Lipid Metabolism	1.24659e+06	806189	796482	1.01675e+06	1.14452e+06
647.621	4.05631	Cer(d18:1/24:1)	Lipid Metabolism	1.00842e+06	996804	987282	1.1164e+06	967561
776.555	3.55473	PG(18:0/18:1)	Lipid Metabolism	1.60792e+06	1.32476e+06	1.53625e+06	1.07923e+06	1.64853e+06
759.576	3.86195	PE(37:1)	Lipid Metabolism	22703610	2.16311e+07	2.02441e+07	1.9279e+07	2.11364e+07
821.578	3.89312	PS(O-36:1)	Lipid Metabolism	3.69407e+06	3.55899e+06	3.29101e+06	3.28442e+06	3.53342e+06
649.637	7.06487	N-Lignoceroylsphingosine	Lipid Metabolism	205935	172381	166919	163372	181933
763.514	3.92843	PC(35:6)	Lipid Metabolism	332631	387843	409571	418516	409249
751.553	4.0263	PE(O-18:1/20:4)	Lipid Metabolism	522998	531126	510096	598696	583872
773.592	3.89511	PE(20:0/18:1)	Lipid Metabolism	823670	910979	854205	754640	849696
807.504	3.62449	PS(16:0/22:6)	Lipid Metabolism	616075	463761	584125	487131	565568
809.52	3.62137	PS(18:1/20:4)	Lipid Metabolism	2.79637e+06	2.38091e+06	2.4023e+06	2.28614e+06	2.42739e+06
796.524	3.55465	PG(16:0/22:5)	Lipid Metabolism	663333	607305	590754	461863	669350
811.536	3.61468	PS(18:1/20:3)	Lipid Metabolism	8784319	7.92468e+06	7.23183e+06	7.64173e+06	7833655
785.592	3.83852	PC(18:1/18:1)	Lipid Metabolism_Glycerophospholipids [GP]	5.89063e+06	5.0328e+06	5.26936e+06	4946561	5.56271e+06
849.608	4.03431	PS(O-16:0/22:1)	Lipid Metabolism	783367	735893	709644	674783	786760
794.556	4.11014	1-18:2-2-18:2-monogalactosyldiacylglycerol		197809	168502	193141	230611	197954
764.571	4.24902	PA(P-42:4)	Lipid Metabolism	606007	620863	610963	658170	679347
862.556	3.63455	PI(18:2/18:0)	Lipid Metabolism	839338	619461	735603	668066	781289
864.572	3.62792	PI(14:0/22:1)	Lipid Metabolism	2.20766e+06	1.57427e+06	1.6481e+06	1.61119e+06	1.84296e+06
822.541	3.52025	PG(18:2/22:4)	Lipid Metabolism	156160	173734	161989	133355	176603
837.55	3.61054	PE-NMe(11M3/11M5)		3.01205e+06	2484128	2.46945e+06	2.60822e+06	2.7168e+06
805.56	3.8248	PC(16:1/22:5)	Lipid Metabolism_Glycerophospholipids [GP]	873112	847372	769537	810927	832222
824.555	3.54955	PG(18:0/22:5)	Lipid Metabolism	228938	206512	190312	148925	241448
807.576	3.82561	PC(16:1/22:4)	Lipid Metabolism	2.39809e+06	2.51524e+06	2.05743e+06	2.02574e+06	2.01898e+06
884.541	3.62282	PI(18:1/20:4)	Lipid Metabolism	328011	245424	280014	290131	300593
886.556	3.62209	PI(18:2/20:2)	Lipid Metabolism	725911	666198	602907	709950	695336
810.663	4.13001	SM(d42:3)	Lipid Metabolism	237146	254516	242638	284557	239757
812.677	4.22612	SM(d18:1/24:1)	Lipid Metabolism	858513	789899	792444	876960	893859
833.592	3.81824	PC(18:2/22:4)	Lipid Metabolism	696706	643310	590539	591465	611572
916.604	10.3283	PI(20:0/20:3)		55838.2	217183	NA	21505.8	6800.98
121.074	16.2002	Tromethamine	Medium Component_Xenobiotics Biodegradation and Metabolism	608823	619189	1.42657e+06	772458	640438
169.05	14.1858	Phosphodimethylethanolamine	Lipid Metabolism	145900	178134	89738.6	110987	118929
86.0369	4.08053	Diacetyl	Carbohydrate Metabolism	1.13063e+06	1.25739e+06	1.20113e+06	1.65189e+06	1.48798e+06
118.027	15.3393	Succinic acid	Carbohydrate Metabolism	178823	168186	136181	140261	111915
134.022	16.4069	Malic acid	Carbohydrate Metabolism	4.5496e+06	2.44531e+06	2.20493e+06	3.10067e+06	2.29586e+06
265.949	18.3893	2-hydroxy-3-(sulfooxy)butanedioic acid		6872.93	28754.5	1463.23	5549.78	1591.42
133.037	14.7736	Aspartic acid	Amino Acid Metabolism	3.02258e+06	2.04619e+06	1.37917e+06	1.52043e+06	3175330
132.053	15.3552	Asparagine	Amino Acid Metabolism	782480	521223	450294	577459	759369
88.0524	4.16422	Butyric acid	Carbohydrate Metabolism	62010.3	47212.6	84308.8	87416.2	70359.8
136.037	12.4055	2,3,4-trihydroxy-butanoic acid	Carbohydrate Metabolism	140917	238958	62219.8	148862	86853.2
131.069	14.374	Creatine	Amino Acid Metabolism	2.37664e+06	2.1579e+06	1.23061e+06	3.15501e+06	1.84325e+06
103.063	14.9092	gamma-Aminobutyric acid	Amino Acid Metabolism	227200	155414	165257	216202	56596.5
119.058	14.44	Threonine	Amino Acid Metabolism	246253	197636	150213	198382	267604
819.563	3.96096	DGCC(20:5/20:5)		1.16947e+06	1.11076e+06	1.07631e+06	1.12101e+06	1.14462e+06
875.792	7.10355	TG(16:1/18:0/18:1)	Lipid Metabolism	234951	233392	146143	171040	158096
98.0844	10.3996	xi-4,5-Dihydro-2,4(5)-dimethyl-1H-imidazole		47408.1	94852.1	27847.5	38802.5	29084.9
146.069	14.8661	Glutamine	Amino Acid Metabolism	3.14699e+06	3.29194e+06	1.75683e+06	3.97471e+06	2.7705e+06
166.047	13.5771	2,3,4,5-Tetrahydroxypentanoic acid	Carbohydrate Metabolism	103118	140771	65694.9	125810	123486
277.996	15.9733	2-C-methyl-D-erythritol-2,4-cyclodiphosphate		78425.8	88023.6	73133.6	40278.1	84684.2
288.036	15.6994	3-(Phosphoacetylamido)-L-alanine		11383.1	70189.5	4918.17	NA	2821.4
117.079	10.739	Valine	Amino Acid Metabolism_Lipid Metabolism	649923	596059	353706	827240	515918
149.051	11.1079	Methionine	Amino Acid Metabolism	112203	97706.6	58364.8	95498.9	109017
230.019	15.7677	Ribose 5-phosphate	Carbohydrate Metabolism	105806	250479	63024.4	101878	71763.9
132.09	22.1981	Ornithine	Amino Acid Metabolism	281466	340285	225920	333984	278482
216.04	14.0143	2-C-Methyl-D-erythritol 4-phosphate	Lipid Metabolism	40688	124484	26591.1	35718.2	35806.6
103.1	20.756	Choline	Amino Acid Metabolism	173971	424056	90111.9	192650	122288
183.066	14.2028	Phosphorylcholine	Lipid Metabolism	16450385	16164200	1.0146e+07	1.23655e+07	1.09449e+07
156.017	10.3026	Orotic acid	Nucleotide Metabolism	64743.4	10236.4	41166.2	42905.9	18722.1
136.038	9.93476	Hypoxanthine	Nucleotide Metabolism	371829	219134	160766	158923	262515
135.055	13.5456	Adenine	Nucleotide Metabolism	268359	119242	247030	162826	268570
112.064	7.64376	2-Hydroxypyridine		7914.27	NA	15987.9	7565.09	35962.8
146.022	16.1262	Oxoglutaric acid	Carbohydrate Metabolism	2.66558e+06	1.4395e+06	1.30997e+06	2.35092e+06	837255
150.008	6.51311	2-oxo-5-chloro-4-pentenoate		38258.7	82452.2	24424.2	38820.7	43431
129.043	14.5766	4-Oxoproline	Amino Acid Metabolism	455132	293008	227304	332526	256206
145.037	10.5419	2-Keto-glutaramic acid	Amino Acid Metabolism	67499.4	69472.6	54916.4	54376.2	46560.6
176.043	17.3174	Ureidosuccinic acid	Nucleotide Metabolism	131100	86880.4	61470.5	45708.2	35230.9
116.047	7.97493	alpha-Ketoisovaleric acid	Amino Acid Metabolism	132606	120866	136563	143756	157822
148.037	15.5365	2-Hydroxyglutaric acid	Amino Acid Metabolism	311425	414525	190858	411266	298086
115.063	12.4061	Proline	Amino Acid Metabolism	801899	796384	426503	720023	886713
131.058	13.9681	5-Aminolevulinic acid	Amino Acid Metabolism	442434	458669	218872	505241	311330
147.053	14.4295	Glutamic acid	Amino Acid Metabolism	7.99285e+06	3.95355e+06	3.30852e+06	4.98199e+06	3.70979e+06
166.048	4.23375	arabinonate	Carbohydrate Metabolism	94034.9	100920	137044	120052	109881
212.009	14.8218	phosphinomethylisomalate		86286.5	97464.3	67940.6	72031.4	70302.5
1030.8	3.54524	TG(22:4/22:5/22:5)	Lipid Metabolism	110091	69648	88462.5	91103.1	98133.5
190.059	15.4462	Carglumic acid	Amino Acid Metabolism	33260.3	108755	22228.6	18293.9	27015.8
146.058	4.44804	2-Aceto-2-hydroxybutanoic acid	Amino Acid Metabolism	2.49891e+06	2.72459e+06	1.73349e+06	4.33232e+06	3.36794e+06
178.048	12.1718	Gluconolactone	Carbohydrate Metabolism	143430	193586	75354.1	233229	134941
194.043	14.6446	Glucuronate	Carbohydrate Metabolism	30835.3	80285	13656.7	68891.5	24489.6
129.079	22.7263	N4-Acetylaminobutanal	Amino Acid Metabolism	227048	168263	213401	159369	315535
176.08	13.1188	Alanyl-Serine	Peptide	100970	85666.6	64811.3	42268.2	140707
192.075	13.138	Serylserine	Peptide	56801.5	65227.8	43029.1	39078.3	105044
116.084	4.77906	Caproic acid	Lipid Metabolism	1.3853e+06	1.43541e+06	1.62464e+06	1.28409e+06	1.44139e+06
165.1	14.1537	(R) 2,3-Dihydroxy-3-methylvalerate	Amino Acid Metabolism	5625.12	10625.1	80189.4	26963.7	10989.8
164.068	6.51924	Rhamnose	Carbohydrate Metabolism	1.35772e+06	987794	1.68989e+06	1.25154e+06	1.72443e+06
180.063	17.0531	Glucose	Carbohydrate Metabolism	181255	222946	109847	194786	130184
196.058	13.945	Gluconic acid	Carbohydrate Metabolism	868227	1.73891e+06	449161	219785	1.08498e+06
175.096	15.7617	Citrulline	Amino Acid Metabolism	47093.6	42894.5	41218.8	68461.1	39569.2
131.095	10.4901	Leucine	Amino Acid Metabolism_Lipid Metabolism	169584	162965	71077.1	155820	206871
179.079	13.3151	Glucosamine	Carbohydrate Metabolism	9650.74	11497.2	61430.1	22784.4	13996.9
195.074	17.0524	2-Amino-2-deoxy-D-gluconate	Carbohydrate Metabolism	NA	272367	NA	417406	1209.5
260.03	17.4501	Hexose phosphate	Carbohydrate Metabolism	127263	121107	108546	100276	101810
130.111	19.9114	N-Acetylputrescine	Amino Acid Metabolism	215897	301556	161911	217612	163726
146.106	22.8362	Lysine	Amino Acid Metabolism	1.15847e+06	844196	1.12573e+06	808339	1.61834e+06
174.112	24.2354	Arginine	Amino Acid Metabolism	934911	1.1718e+06	798159	838415	1.19108e+06
259.046	16.4975	Glucosamine 6-phosphate	Amino Acid Metabolism	NA	821962	NA	570951	NA
134.094	7.50203	Polypropylene glycol (m w 1,200-3,000)		229794	699230	1.05043e+06	332313	277183
150.089	6.16849	triethylene glycol		97787.4	97145	98090.5	80704.3	98291
218.056	13.7818	Mannitol	Carbohydrate Metabolism	2.24559e+07	3.50448e+07	2.59923e+07	1.97378e+07	2.41188e+07
246.05	12.4837	Glycerophosphoglycerol		74408.9	59073.2	57077.5	53723.5	65780.5
262.045	15.166	Sorbitol-6-phosphate	Carbohydrate Metabolism	139645	143743	106626	110694	131937
122.048	7.53821	Niacinamide	Metabolism of Cofactors and Vitamins	126306	141610	114460	150750	146450
172.048	15.3938	Hydantoin-5-propionic acid	Amino Acid Metabolism	45257.8	185434	28389.4	23268.3	36180.8
128.047	7.49873	Dihydro-4,4-dimethyl-2,3-Furandione	Metabolism of Cofactors and Vitamins	234619	336245	363266	298398	359396
192.027	18.9048	Citric acid	Carbohydrate Metabolism	232621	164868	270781	255867	197222
155.069	14.4517	Histidine	Amino Acid Metabolism	1.15191e+06	1.09792e+06	817811	1.09968e+06	1.45085e+06
127.063	7.4985	2,3,4,5-Tetrahydropiperidine-2-carboxylate	Amino Acid Metabolism	465550	397973	87622.6	69981	363721
158.058	4.81239	Isopropylmaleate	Amino Acid Metabolism	72403.2	90128.5	103570	80595.5	78174.6
189.064	14.1489	N-Acetylglutamic acid	Amino Acid Metabolism	72361.9	38058.3	56490.1	61638	78772.9
172.085	12.4956	Glycylproline	Peptide	127391	103606	82608.7	61111.2	215243
204.075	16.3626	beta-aspartyl-L-alanine	Peptide	121731	445000	72124.6	48569.3	343694
220.069	16.2451	beta-aspartyl-L-serine	Peptide	149417	250194	117517	57713.3	387517
144.079	4.78638	FA oxo(7:0)	Lipid Metabolism	164048	155765	150593	174913	190116
192.063	12.6432	Quinic acid	Amino Acid Metabolism	69617.8	60479.5	37464.3	78639.3	58638.2
203.091	13.0092	Alanyl-Asparagine	Peptide	30179.3	33577.8	24594.6	13139.8	90436.1
219.085	13.6381	1-Guanidino-1-deoxy-3-dehydro-scyllo-inositol		98123.5	104200	76100	48575.3	333543
143.095	10.0262	Proline betaine		809264	717877	398841	984135	597246
159.09	11.6704	5-Acetamidovalerate	Amino Acid Metabolism	156336	147937	74476	180797	109991
191.062	7.49671	N-Acetyl-L-methionine		2.51085e+06	660188	1.50842e+06	1.53425e+06	1.83057e+06
174.1	9.04521	N-Acetylornithine	Amino Acid Metabolism	167272	255214	111274	88571.1	242734
206.09	12.1737	Threoninyl-Serine	Peptide	122552	415995	82269.6	52074.1	306211
130.099	4.46695	2-Methylhexanoic acid	Lipid Metabolism	1.01242e+06	1.15248e+06	1.13564e+06	918815	1.08622e+06
163.121	21.6641	FA hydroxy(7:0)	Lipid Metabolism	1292.35	433407	NA	1530.8	NA
145.11	12.6888	2-Aminoheptanoate	Lipid Metabolism	131636	129657	70972.2	172581	98226.5
161.105	12.6037	Carnitine	Amino Acid Metabolism	85046.8	58315.8	49115.6	77859.2	68343.2
290.04	16.3792	Sedoheptulose 7-phosphate(2-)	Carbohydrate Metabolism	429202	335896	381579	506523	371949
122.037	7.50003	Benzoic acid	Amino Acid Metabolism	4.6513e+07	58166188	5.69958e+07	4.05389e+07	3.93321e+07
139.063	7.50392	Trigonelline	Metabolism of Cofactors and Vitamins	5187409	3.93096e+06	4187084	4.71318e+06	4.18949e+06
153.079	7.485	Dopamine	Amino Acid Metabolism	1.63999e+06	1.24748e+06	1.34766e+06	1.57906e+06	1.3825e+06
268.046	15.5269	kifunensine		322231	682524	87211.3	61918.2	252274
248.065	17.6452	beta-aspartyl-L-aspartic acid	Peptide	79895.4	207361	55378.6	42218.2	121191
212.091	11.7505	Glycyl-Histidine	Peptide	794711	2.18946e+06	539283	437286	1.30013e+06
247.08	16.018	Asparaginyl-Aspartic acid	Peptide	85698.9	305666	79666.6	47028	187496
155.095	4.72679	Retronecine	Biosynthesis of Secondary Metabolites	92131.5	93806.3	112909	86830.6	97159.7
186.1	11.2816	Alanyl-Proline	Peptide	4.20372e+06	12314649	1.48431e+06	1.08793e+06	9.12052e+06
202.095	13.0791	Prolyl-Serine	Peptide	132359	384475	100188	52380.7	409239
218.09	15.1659	gamma-Glutamylalanine	Peptide	63349	964093	45045.8	23703	558062
234.085	15.6783	beta-aspartyl-L-threonine	Peptide	83845.7	612084	83428.7	48936.7	506650
246.096	13.8024	Asparaginyl-Asparagine	Peptide	167631	200690	127098	79239.5	558150
174.089	6.5216	Suberic acid	Lipid Metabolism	173269	97814.6	143274	138406	163126
217.106	12.177	N-a-Acetylcitrulline	Amino Acid Metabolism	40230.6	150707	27165	12259.2	175080
233.101	12.6632	Ala/Gly/Ser	Peptide	215397	1.25702e+06	128515	74780.7	787067
173.105	4.82666	N-Acetylleucine		59757.4	71801.7	53534.1	68099.8	76960.2
188.116	7.87122	N6-Acetyl-L-lysine	Amino Acid Metabolism	82774.8	392324	58268.7	39084.8	258089
204.111	9.40444	N6-Acetyl-N6-hydroxy-L-lysine	Amino Acid Metabolism	131174	425387	93687.5	59636.2	425010
220.106	11.1399	Threoninyl-Threonine	Peptide	93955.2	552106	63448	45754.4	587470
301.056	14.8611	N-Acetylglucosamine 6-phosphate	Amino Acid Metabolism	27161.7	292332	20260.3	297087	22516.8
144.115	4.22825	Caprylic acid	Lipid Metabolism	2.48145e+06	2.14336e+06	2.93345e+06	2.18906e+06	2.65206e+06
209.126	9.25088	Mycinose		25022.2	36057.8	379465	94680.3	51523.5
203.127	16.7766	Lysyl-Glycine	Peptide	122933	89005.5	92873.1	57472.3	270612
159.126	12.6893	DL-2-Aminooctanoic acid		68046.8	65532.5	41944	87466.4	53493.3
238.099	10.3715	15(R)-hydroperoxy-EPE	Medium Component	2.00595e+07	3.29303e+07	12315526	16334558	1.16745e+07
202.143	21.4066	Arg-OEt		290812	36493.3	312655	172427	612199
194.115	6.48651	Tetraethylene glycol		347836	267729	729265	448242	747927
120.057	4.34195	Phenylacetaldehyde	Amino Acid Metabolism	636186	698146	891482	1.2638e+06	790977
136.052	5.94601	Phenylacetic acid	Amino Acid Metabolism	860304	723666	872282	651596	975013
184.019	3.66551	Polystyrene sulfonate		140581	94136.1	131530	149314	140889
249.044	16.4734	diuron		279932	383074	259310	272270	349333
165.079	9.72746	Phenylalanine	Amino Acid Metabolism	172480	178839	109405	149768	203585
181.074	12.6816	Tyrosine	Biosynthesis of Secondary Metabolites_Amino Acid Metabolism	213023	181360	130363	205907	195315
224.091	9.28526	Temurin		93671.1	316358	52451.3	36717.4	164985
324.036	14.9473	3'-UMP	Nucleotide Metabolism	1.28031e+06	388981	1.01298e+06	660901	1.1308e+06
243.085	11.5289	Cytidine	Nucleotide Metabolism_Xenobiotics Biodegradation and Metabolism	53752.8	22529.8	48424.5	37439.9	51119.8
247.069	14.2861	N-Succinyl-L-glutamate	Amino Acid Metabolism	247700	47444.2	205180	166651	247750
404.002	16.8696	Uridine 5'-diphosphate	Nucleotide Metabolism	44129	30419.6	51882.4	30409.2	71778.7
230.09	15.5573	Aspartyl-L-proline	Peptide	9.20987e+06	1.91179e+07	2.19693e+06	1.67717e+06	7.29391e+06
246.085	13.8345	5,6-Dihydrouridine		623313	1.88476e+06	136524	112963	236887
262.08	14.2831	beta-aspartyl-L-glutamic acid	Peptide	94815	389456	22682.2	28616.4	48498.6
323.052	15.8489	Cytidine monophosphate	Nucleotide Metabolism	314932	104624	263784	164692	334969
226.107	10.8054	Carnosine	Amino Acid Metabolism	123355	1.0993e+06	120054	65677.1	565921
242.101	12.2999	Serylhistidine	Peptide	48828	147837	37171	27409.5	225037
197.116	11.6141	Histidine trimethylbetaine	Amino Acid Metabolism	101753	70347.1	49282.7	103769	57084
229.106	13.4525	Asparaginyl-Proline	Peptide	1.5865e+06	1.3063e+07	475556	271018	6.17658e+06
261.096	15.6958	Ala/Asp/Gly	Peptide	99685.4	281493	99841.7	55557	300551
216.111	11.408	gamma-Glutamyl-gamma-aminobutyraldehyde	Amino Acid Metabolism	2.41132e+06	4.85555e+06	771657	556399	5.12533e+06
232.106	13.7018	N2-Succinyl-L-ornithine	Amino Acid Metabolism	420855	5485871	206302	108235	3.00698e+06
248.101	14.7235	Glutamylthreonine	Peptide	214275	236642	144008	115194	126072
260.112	13.5358	Ala/Asn/Gly	Peptide	39729.1	22037.9	31559.8	20075.9	96251.7
156.115	4.34282	FA methyl (8:1)	Lipid Metabolism	195030	152527	213942	188455	196972
172.11	4.64504	FA oxo(9:0) oxo-nonanoic acid	Lipid Metabolism	234070	214268	295334	274742	280671
231.122	10.1554	Ala/Ala/Ala	Peptide	175569	663242	109335	71127.7	1.10549e+06
247.116	11.8949	Ala/Ala/Ser	Peptide	52278	928471	31404.9	12252.8	391430
187.121	11.0908	8-Amino-7-oxononanoate	Metabolism of Cofactors and Vitamins	69718	75535.7	41689.7	89839.3	57194.3
203.116	10.16	Acetylcarnitine	Amino Acid Metabolism	361413	292125	299977	481016	347208
251.1	14.1382	Muramic acid		74975.3	60641.2	60535.5	67531	72812.7
202.132	7.4941	Isoleucyl-Alanine	Peptide	392276	872798	263526	170149	1.00459e+06
218.127	8.15604	Lysopine	Amino Acid Metabolism	82344.6	159434	48282.5	33299.9	260531
158.131	4.09058	FA methyl(8:0)	Lipid Metabolism	6.2009e+06	5.60291e+06	9.0775e+06	7.45862e+06	7.75064e+06
233.138	16.4577	Lysyl-Serine	Peptide	89305.7	87612.4	82561.2	50314.8	290731
173.142	7.54341	aminononanoic acid	Lipid Metabolism	437745	235015	2.07492e+06	1.05174e+07	9.09656e+06
188.152	21.4988	N6,N6,N6-Trimethyl-L-lysine	Amino Acid Metabolism	716529	565813	652067	660408	697433
218.019	17.1649	2-hydroxy-3-[-3-oxoprop-1-en-1-yl]-2H-pyran-6-carboxylate		87911.6	129721	54421.7	102436	69247
179.058	6.40564	Hippuric acid	Amino Acid Metabolism	160446	100991	104736	120622	108432
111.983	8.83057	Monomethyl sulfate		117972	1.66701e+06	79364.9	93121	69985
124.909	13.2957	monomer		379733	404682	416407	410146	395567

## Sheet: Exp2
				Average relative intensity
Mass	RT	Putative metabolite	Map	3D7 WT	3D7+GlcN	M17-HAglmS	M17-HAglmS+GlcN
84.021	13.8714	4-Hydroxy-2-butynal		147097	141039	157231	291024
84.0211	7.8656	3-Butynoate	Carbohydrate Metabolism	365567	530742	646659	504551
85.0891	10.912	Piperidine		206516	210035	260452	337095
86.0369	4.43808	methacrylate		2.91271e+06	2.9369e+06	3.39685e+06	3.23242e+06
89.0477	14.6838	Alanine	Amino Acid Metabolism	1.29896e+06	2.17869e+06	1.88882e+06	2.03311e+06
89.084	17.2318	Dimethylethanolamine		395925	607235	412759	413602
90.0316	13.8654	Dihydroxyacetone	Lipid Metabolism	149887	144654	194229	234555
90.0317	9.06777	Lactic acid	Carbohydrate Metabolism	348487	818204	1.50914e+06	2.03055e+06
92.0474	10.3528	Glycerol	Carbohydrate Metabolism	54262.3	99138.9	89887.5	73584.1
94.0418	7.3144	Phenol	Amino Acid Metabolism	296513	297885	316395	309551
97.9676	15.8069	Sulfate	Nucleotide Metabolism	860486	769492	963177	740052
97.977	12.3297	Hydrogen phosphate	Energy Metabolism	2.30333e+07	27000000	20500000	1.86333e+07
98.0367	13.9184	2,4-pentadienoic acid	Lipid Metabolism	285035	331286	310111	513851
98.0844	10.3806	xi-4,5-Dihydro-2,4(5)-dimethyl-1H-imidazole		402570	632133	374574	686054
100.089	4.30216	Hexanal	Lipid Metabolism	425009	424692	477745	302488
102.032	4.38939	methyl pyruvate		148423	173497	186418	173882
102.032	13.8334	2-Methyl-3-oxopropanoic acid	Amino Acid Metabolism	88127.3	74191.3	95481.3	132468
102.032	7.86415	2-Ketobutyric acid	Amino Acid Metabolism	639008	793193	810285	782002
102.068	7.84928	Valeric acid	Lipid Metabolism	2.66092e+06	2.57101e+06	2.31599e+06	2.77732e+06
103.063	13.9831	Dimethylglycine	Amino Acid Metabolism	868492	826716	846515	832063
103.063	15.4339	gamma-Aminobutyric acid	Amino Acid Metabolism	4.06699e+06	7.77455e+06	5.50024e+06	11500000
103.1	20.0181	Choline	Amino Acid Metabolism	4.33039e+06	7.17667e+06	1.89527e+06	7.2479e+06
105.043	15.6959	Serine	Lipid Metabolism_Amino Acid Metabolism	4.50963e+06	5.21818e+06	4.86113e+06	4.68374e+06
109.064	16.1277	Brunfelsamidine		56260	49374.9	62344	105052
109.064	11.6918	Dap		143095	64265.2	153204	201437
111.906	12.314	selenium dioxide		198866	199325	197001	153049
111.992	14.175	Hydroxymethylphosphonate	Amino Acid Metabolism	216365	250819	215390	221634
112.027	9.90201	Uracil	Nucleotide Metabolism	152774	131140	109810	74404.8
113.059	9.81486	Creatinine	Amino Acid Metabolism	176784	461337	361054	392470
114.079	15.1057	3-Amino-2-piperidone		21719.1	22337.3	58294.8	156388
115.063	14.994	Acetamidopropanal		25723.3	24790.5	43915.1	112218
115.063	12.7926	Proline	Amino Acid Metabolism	11676505	18800000	1.62333e+07	3.69667e+07
116.047	4.37801	Methylacetoacetic acid		3.43746e+06	3.61514e+06	4.253e+06	4.08937e+06
116.047	13.8713	Glutarate semialdehyde	Amino Acid Metabolism	151081	168715	171571	344934
116.095	13.2232	5-Aminopentanamide	Amino Acid Metabolism	6380.07	5672.36	8223.73	97606.8
117.043	10.1704	Aspartate-semialdehyde	Amino Acid Metabolism	27593.3	24997.6	30156.9	89249.1
117.079	12.4715	Valine	Lipid Metabolism_Amino Acid Metabolism	5.86789e+06	5.14387e+06	6.80427e+06	9872960
117.079	11.352	5-Aminopentanoic acid	Amino Acid Metabolism	3.09079e+06	8.06656e+06	5.65083e+06	6.30569e+06
118.027	14.6265	Succinic acid	Carbohydrate Metabolism	263511	409317	245686	350603
118.042	7.89697	Benzofuran		720770	761616	649799	922636
118.042	6.85121	Benzofuran		886279	908279	1.34586e+06	1.50223e+06
120.057	4.36068	Phenylacetaldehyde	Amino Acid Metabolism	2.53597e+06	2.55182e+06	3.00836e+06	2.91458e+06
120.057	7.02383	Styrene Oxide	Xenobiotics Biodegradation and Metabolism	1.97485e+06	2.58311e+06	3.08938e+06	2.77323e+06
120.057	7.72795	Phenylacetaldehyde	Amino Acid Metabolism	8.45552e+06	10650360	1.07636e+07	10245346
122.048	13.9484	Picolinamide		1.03294e+06	1.07539e+06	990006	1.19651e+06
122.048	7.95334	Niacinamide	Metabolism of Cofactors and Vitamins	2.44436e+06	2.04098e+06	1.77613e+06	2.52769e+06
123.992	14.858	Phosphonoacetaldehyde	Amino Acid Metabolism	713554	556907	397556	790130
125.048	16.1541	Aminohydroquinone		NA	120959	NA	187139
125.999	10.2579	2-Hydroxyethanesulfonate	Amino Acid Metabolism	361171	1.2036e+06	715578	980334
126.104	4.27589	2-octenal	Lipid Metabolism	2.96015e+06	3.85849e+06	3.27528e+06	2.32045e+06
126.104	5.33744	Sulcatone	Biosynthesis of Secondary Metabolites	255677	316299	259534	189178
128.047	7.85134	Dihydro-4,4-dimethyl-2,3-Furandione	Metabolism of Cofactors and Vitamins	377220	419955	381543	293068
128.059	14.7515	Dihydrothymine	Nucleotide Metabolism	217706	488194	315073	294772
129.043	9.9127	Pyroglutamic acid	Amino Acid Metabolism	654739	1.71944e+06	1.77775e+06	2.19768e+06
129.079	12.4533	Pipecolic acid	Amino Acid Metabolism	5.55071e+06	5.62272e+06	6.29065e+06	1.20757e+07
130.063	11.3836	3-Methyl-2-oxovaleric acid	Lipid Metabolism_Amino Acid Metabolism	123891	126622	191676	244636
130.063	4.84782	Ketoleucine	Amino Acid Metabolism	117318	126682	134717	179536
130.111	19.0967	N-Acetylputrescine	Amino Acid Metabolism	5.0919e+06	5.63137e+06	4.12438e+06	7.77104e+06
131.058	14.3874	N-Acetyl-beta-alanine	Amino Acid Metabolism	3.6727e+06	10477898	6.09623e+06	7.08604e+06
131.069	14.6281	Creatine	Amino Acid Metabolism	11135201	3.42667e+07	26200000	2.81667e+07
131.095	11.0432	Leucine	Lipid Metabolism_Amino Acid Metabolism	5084477	6.63634e+06	4.94287e+06	6.20114e+06
131.095	11.3837	Isoleucine	Amino Acid Metabolism	5084477	6.63634e+06	6.16901e+06	6.21527e+06
132.053	12.4994	Ureidopropionic acid	Nucleotide Metabolism	70966.4	71510.2	72758.6	66931.6
132.053	15.1974	Asparagine	Amino Acid Metabolism	11539381	13358194	9.51571e+06	6.6034e+06
132.09	23.8189	(2R,4S)-2,4-Diaminopentanoate	Amino Acid Metabolism	205863	181026	180477	156575
132.09	22.1148	Ornithine	Amino Acid Metabolism	2489553	3.48914e+06	2.88231e+06	3.20523e+06
133.038	14.6899	Aspartic acid	Amino Acid Metabolism	1.64667e+07	1.33756e+07	1.54333e+07	1.50667e+07
133.074	8.21002	3-nitro-2-pentanol		355253	609113	501832	517758
134.022	15.5997	Malic acid	Carbohydrate Metabolism	1.82108e+06	2.82122e+06	2.27727e+06	2.71078e+06
135.055	9.70791	Adenine	Nucleotide Metabolism	247462	401559	269562	584788
136.037	11.7996	2,3,4-trihydroxy-butanoic acid	Carbohydrate Metabolism	120897	352370	207836	449706
136.039	15.1281	Allopurinol		391498	340896	280406	247776
136.039	10.2006	Hypoxanthine	Nucleotide Metabolism	4.63655e+06	4.41319e+06	3.8549e+06	6.47917e+06
136.052	7.84277	Phenylacetic acid	Amino Acid Metabolism	2.00937e+07	2.17667e+07	24290287	3.64667e+07
136.052	4.58918	4-Hydroxyphenylacetaldehyde	Amino Acid Metabolism	3.82605e+06	4.44346e+06	3.86223e+06	2.66119e+06
136.052	6.86553	4-Methylbenzoic acid	Xenobiotics Biodegradation and Metabolism	5.37108e+06	5.30875e+06	7.23357e+06	9.83775e+06
136.052	7.22959	Phenyl acetate		2.04604e+06	7889767	3.0551e+06	4.25439e+06
136.074	10.2557	Apiitol		1.05716e+06	1.27699e+06	1.22881e+06	1.50345e+06
139.063	7.85394	Trigonelline	Metabolism of Cofactors and Vitamins	6.27615e+06	7.40551e+06	6.61079e+06	6.98151e+06
139.978	17.4005	Sulfoacetate	Amino Acid Metabolism	87555.6	296908	93685.4	122389
141.019	15.8136	O-Phosphoethanolamine	Amino Acid Metabolism	1.55098e+06	1.4426e+06	1.17121e+06	2.32173e+06
142.004	3.92864	1,2-dihydroxyethylphosphonate		680094	617289	953671	762170
143.095	10.7041	Proline betaine		307760	760845	594915	643573
144.053	13.9855	N-Nitrosoproline		76135.1	75234.3	87109.3	80835.1
145.074	12.4391	4-Acetamidobutanoic acid	Amino Acid Metabolism	124693	212736	169397	182771
145.11	13.3711	2-Aminoheptanoate	Lipid Metabolism	539357	1.68551e+06	1.16856e+06	1.15628e+06
146.022	15.0568	Oxoglutaric acid	Carbohydrate Metabolism	1.46224e+06	3.25616e+06	1.44724e+06	1.59322e+06
146.058	6.18642	2-Aceto-2-hydroxybutanoic acid	Amino Acid Metabolism	1.0015e+06	867040	1.31478e+06	1.29839e+06
146.069	15.0091	Glutamine	Amino Acid Metabolism	43200000	98000000	65100000	7.11333e+07
146.069	12.3472	Alanylglycine	Peptide	127176	121214	105608	153335
146.069	11.8539	Ureidoisobutyric acid	Nucleotide Metabolism	55492.5	31524.3	64066.6	123937
146.094	4.79672	FA hydroxy(7:0)	Lipid Metabolism	224169	118563	215093	177607
146.106	22.8183	Lysine	Amino Acid Metabolism	2.39667e+07	1.71383e+07	2.33667e+07	18700000
147.053	14.4143	Glutamic acid	Amino Acid Metabolism	4.34667e+07	5.01667e+07	39700000	41400000
147.053	10.2072	O-Acetylserine	Amino Acid Metabolism	159618	210913	221600	2067654
148.037	14.809	2-Hydroxyglutaric acid	Amino Acid Metabolism	592379	1.50094e+06	1.06069e+06	1.15673e+06
148.074	6.93978	(R) 2,3-Dihydroxy-3-methylvalerate	Amino Acid Metabolism	500849	512969	636643	958640
149.051	11.5713	Methionine	Amino Acid Metabolism	3.24087e+06	4.56971e+06	4.31521e+06	5.45529e+06
150.017	17.8192	3-carboxy-2,3-dihydroxypropanoate	Carbohydrate Metabolism	353850	355841	353881	345745
150.068	4.37296	Hydrocinnamic acid	Amino Acid Metabolism	215931	221586	250872	256474
151.049	16.3709	2-Hydroxyadenine		153323	99560.3	127580	78633
151.049	12.3379	Guanine	Nucleotide Metabolism	1.19903e+06	849901	1.14798e+06	855199
152.069	12.9326	Arabitol	Carbohydrate Metabolism	118862	159417	141958	213548
153.019	14.8725	(acetamidomethyl)phosphonate		144908	103695	70512	121052
153.994	15.882	3-sulfopropanoate		398975	505178	372542	591320
155.07	14.6162	Histidine	Amino Acid Metabolism	39500000	5.04333e+07	4.54667e+07	46600000
156.017	9.67608	Orotic acid	Nucleotide Metabolism	114049	111818	107382	112360
157.074	14.598	3-Methylcrotonylglycine		230801	229122	213821	226941
158.033	10.6786	4,5-Dihydroorotic acid	Nucleotide Metabolism	70878.4	65234.2	91884.9	157987
158.094	7.84305	Alpha-Ketooctanoic acid	Lipid Metabolism	366510	291408	376641	465069
159.09	12.2419	5-Acetamidovalerate	Amino Acid Metabolism	157900	342033	246297	250378
159.126	13.3021	DL-2-Aminooctanoic acid		337102	944403	700370	699884
160.085	11.0376	Alanyl-D-alanine	Amino Acid Metabolism	131482	57813.4	155000	162257
160.121	22.2845	Carnitinamide		100706	95588.9	107865	86252
161.069	15.2393	Aminoadipic acid	Amino Acid Metabolism	71484.2	427788	65386.7	1.12976e+06
161.069	16.0249	N-methyl-L-glutamic Acid	Energy Metabolism	95864.6	626704	89873.2	458634
161.069	11.2256	Acetylhomoserine	Amino Acid Metabolism	263177	437270	304927	449421
161.105	13.2831	Carnitine	Amino Acid Metabolism	423553	1.02037e+06	728098	890639
162.053	12.2439	3-Ethylmalate	Carbohydrate Metabolism	99036.2	273050	153594	233891
162.064	14.1711	Glycyl-Serine	Peptide	98714.7	73718.9	118261	184449
164.069	7.87617	Rhamnose	Carbohydrate Metabolism	4.30275e+07	5.18667e+07	53767617	4.85333e+07
164.069	11.1095	Rhamnulose	Carbohydrate Metabolism	214803	243793	262058	319217
165.043	13.8225	4-Pyridoxolactone	Metabolism of Cofactors and Vitamins	338675	316278	360061	369119
165.079	10.2239	Phenylalanine	Amino Acid Metabolism	2.40889e+06	2.88601e+06	3.02032e+06	3.12562e+06
166.048	12.4736	2,3,4,5-Tetrahydroxypentanoic acid	Carbohydrate Metabolism	108687	191665	169726	188463
166.084	10.2186	1-Deoxy-D-glucitol		955546	894013	865280	1.14955e+06
166.084	11.3914	3-deoxy-D-galactose		217445	200168	274305	370777
166.084	12.0635	3-deoxy-D-galactose		2.07001e+06	2.37141e+06	2.3953e+06	2.93189e+06
167.058	8.1119	Pyridoxal	Metabolism of Cofactors and Vitamins	119262	190429	155746	236280
167.982	15.5412	3-Phosphonopyruvate	Amino Acid Metabolism	81671.4	69856.5	89832.7	100754
168.028	12.1471	Uric acid	Nucleotide Metabolism	39399.5	248944	55578.1	56520.5
169.05	15.0293	Phosphodimethylethanolamine	Lipid Metabolism	521332	414377	565932	673405
169.085	12.8474	1-Methylhistidine	Amino Acid Metabolism	242202	209854	209739	171957
172.014	14.6764	Glycerol 3-phosphate	Lipid Metabolism	451901	1.00011e+06	474347	1.21634e+06
172.048	15.0408	Hydantoin-5-propionic acid	Amino Acid Metabolism	106957	95439.1	120153	329054
172.085	12.2386	Glycylproline	Peptide	3.84841e+06	2.33826e+06	3.53165e+06	1.66595e+06
172.11	4.79216	9-Oxo-nonanoic acid	Lipid Metabolism	230109	246907	280003	284498
172.11	7.83892	FA oxo(9:0) oxo-nonanoic acid	Lipid Metabolism	554471	604831	636001	600381
172.146	4.24467	Capric acid	Lipid Metabolism	445329	527593	528511	538444
173.08	14.1504	2-Oxoarginine	Amino Acid Metabolism	282404	210619	250447	262080
173.105	4.89249	Hexanoylglycine		81688.3	58261.2	72774	104386
173.105	11.8356	N-Acetylleucine		97825.8	191094	116768	145963
174.112	23.8579	Arginine	Amino Acid Metabolism	2.19667e+07	1.79956e+07	2.09667e+07	1.79333e+07
174.126	4.36201	FA hydroxy(9:0) hydroxy-nonanoic acid	Lipid Metabolism	129580	101581	128780	107873
174.137	21.2892	Ne,Ne dimethyllysine		830863	681643	785510	223452
175.096	15.8605	Citrulline	Amino Acid Metabolism	514657	1.63128e+06	941707	1.23364e+06
175.121	12.6827	D-desosamine		87093.2	177178	133196	135808
176.043	16.261	Ureidosuccinic acid	Nucleotide Metabolism	711827	665439	567531	901986
176.079	11.44	Alanyl-Serine	Peptide	333494	213694	350643	1.08541e+06
176.08	12.8175	N5-formyl-N5-hydroxy-L-ornithine		206516	305110	238350	219194
176.08	12.2374	Alanyl-Serine	Peptide	302225	144994	372323	288771
177.064	12.6868	4-Hydroxy-4-methylglutamate	Carbohydrate Metabolism	69879.8	133086	59288.9	53337.8
177.064	12.6395	4S,5R)-2-amino-4,5,6-trihydroxyhex-2-enoate		149229	236754	102304	64557.8
178.048	12.1919	2-Keto-3-deoxy-D-gluconic acid	Carbohydrate Metabolism	55515.7	137229	75264.5	85080.9
178.048	11.4802	5-deoxy-D-glucuronate		123686	597971	243826	462972
178.063	4.34093	FA hydroxy(12:1)	Lipid Metabolism	232863	244480	271598	266710
178.099	4.37527	Methyleugenol		1.00424e+06	1.04695e+06	1.01761e+06	1.07385e+06
179.058	7.64373	Hippuric acid	Amino Acid Metabolism	149462	184161	205021	179915
179.08	14.7216	Glucosamine	Carbohydrate Metabolism	46655.9	492888	46681.4	1.5773e+06
180.063	12.3665	Galactose	Carbohydrate Metabolism	771933	2.2805e+06	1327743	1.83422e+06
180.063	17.0162	myo-Inositol	Carbohydrate Metabolism	180353	351613	235454	505341
181.074	12.9271	Tyrosine	Amino Acid Metabolism_Biosynthesis of Secondary Metabolites	4618569	7.94255e+06	5.34273e+06	4.21637e+06
181.095	11.367	2-amino-2-deoxy-D-mannitol		767984	721912	881969	1.14772e+06
181.095	21.7889	2-amino-2-deoxy-D-mannitol		2003.62	256899	6008.03	203558
182.079	13.9029	Mannitol	Carbohydrate Metabolism	7.23667e+07	6.49667e+07	7.37621e+07	1.27067e+08
183.066	14.8622	Phosphorylcholine	Lipid Metabolism	258000000	2.13733e+08	126000000	2.72333e+08
184.019	3.79147	Polystyrene sulfonate		148611	188941	100042	285559
184.11	4.00798	3-Isopropenyl-6-oxoheptanoate	Biosynthesis of Secondary Metabolites	609351	536461	636152	574309
185.993	16.3464	2-Hydroxy-3-(phosphonatooxy)propanoate	Carbohydrate Metabolism	639776	1.39743e+06	397820	421258
186.089	4.82806	7,8-diketopelargonate		133200	166445	165803	154230
186.101	11.3042	Alanyl-Proline	Peptide	19214422	1.08176e+07	2.47667e+07	8.93333e+07
186.101	9.7713	Alanyl-Proline	Peptide	734837	396802	1.06361e+06	3.41102e+06
186.162	4.18385	Undecanoic acid	Lipid Metabolism	113522	178339	152802	140385
187.063	8.81693	Indoleacrylic acid		52609.9	151548	104833	104694
187.121	11.7831	8-Amino-7-oxononanoate	Metabolism of Cofactors and Vitamins	331803	974637	603417	712338
188.116	7.98374	N6-Acetyl-L-lysine	Amino Acid Metabolism	1.79182e+06	751361	1.98193e+06	2.97559e+06
188.116	12.8944	Glycylleucine	Peptide	427311	339348	387448	311501
188.127	22.4858	Homo-L-arginine	Amino Acid Metabolism	368979	328263	325772	94134.4
188.141	4.18113	2-Hydroxydecanoate	Lipid Metabolism	126164	97361.2	142795	119689
188.153	21.5995	N6,N6,N6-Trimethyl-L-lysine	Amino Acid Metabolism	4.89977e+06	4.60042e+06	5.23869e+06	5.44752e+06
189.075	12.4804	N-Amidino-L-glutamate		70382.9	51608.5	74946	133376
189.075	14.4722	N-Amidino-L-glutamate		358826	303576	370371	331750
189.1	8.95849	2-{[1-(R)-Carboxyethyl]amino}pentanoate		349137	347487	375314	375935
190.059	16.1913	Carglumic acid	Amino Acid Metabolism	653358	444603	1.10877e+06	1731419
190.095	22.7979	Threoninyl-Alanine	Peptide	194477	151665	180104	140916
190.095	11.0021	N5-acetyl-N5-hydroxy-L-ornithine		291559	115975	438956	437916
192.027	17.6111	2-carboxy-L-xylonolactone		106076	182306	138610	102668
192.063	12.1466	Quinic acid	Amino Acid Metabolism	66560.7	166801	117618	116042
193.074	4.7488	Phenylacetylglycine	Amino Acid Metabolism	83277.6	98215.1	86114.6	102927
194.043	14.0011	idopyranuronate		19519.6	266175	45514.6	326092
194.058	7.78697	Scytalone		1.45667e+06	1.28406e+06	1.57131e+06	1.75285e+06
194.115	5.18963	Tetraethylene glycol		833377	609741	674722	653565
194.115	6.91632	Tetraethylene glycol		910831	631989	1.30661e+06	1.04898e+06
195.074	16.9866	2-Amino-2-deoxy-D-gluconate	Carbohydrate Metabolism	NA	8.06342e+06	NA	6.31407e+06
196.041	8.0838	1-thio--D-glucose		68911.8	243587	86400.7	53841.5
196.058	13.0775	Gluconic acid	Carbohydrate Metabolism	402075	1.26393e+06	864145	1.14518e+06
196.058	13.9871	Galactonic acid		139058	313934	225557	383081
196.058	13.629	Altronate	Carbohydrate Metabolism	251066	659254	280844	877413
197.984	20.5429	Sulfobutanedioic acid		61418.8	78584.1	63812.4	54759.1
200.105	4.83251	FA (12:1) Decenedioic acid	Lipid Metabolism	68918.1	96331.8	98808.9	100913
202.027	14.994	Bergaptol		35471	74072.5	43982.5	20566
202.045	17.0273	phenyl sulfoxide		933095	1.35334e+06	1.14004e+06	1.9111e+06
202.045	13.4898	phenyl sulfoxide		65778.1	255218	132415	252793
202.095	12.5503	Proclavaminic acid	Biosynthesis of Secondary Metabolites	4704053	1.98775e+06	5617066	5.04586e+06
202.121	4.47369	Sebacic acid	Lipid Metabolism	113413	255543	111899	116142
202.132	7.85896	Isoleucyl-Alanine	Peptide	298315	138339	431395	725754
202.132	12.8122	Isoleucyl-Alanine	Peptide	98833.8	281380	183251	202918
202.143	21.3686	Arg-OEt		7.81357e+06	5.73771e+06	7.57939e+06	1610018
203.08	11.9607	N-acetyl-L-2-aminoadipate(2-)	Amino Acid Metabolism	136084	785504	266030	1.22309e+06
203.091	12.7235	Alanyl-Asparagine	Peptide	480621	253224	578414	351932
203.091	11.6181	Glutaminylglycine	Peptide	64993.8	39277.9	60163.8	383039
203.091	13.8097	Ala/Gly/Gly	Peptide	124524	85086.2	140229	347883
203.116	11.0562	Acetylcarnitine	Amino Acid Metabolism	1.67444e+06	3525602	2.51795e+06	2.21001e+06
203.127	16.7351	Lysyl-Glycine	Peptide	1.16118e+06	699857	1.14177e+06	903330
204.075	15.9226	beta-aspartyl-L-alanine	Peptide	1.02034e+06	672809	895430	3466614
204.075	15.1688	beta-aspartyl-L-alanine	Peptide	1.0365e+06	722695	1.43082e+06	6.55611e+06
204.09	11.6266	Tryptophan	Amino Acid Metabolism	959791	1.54094e+06	1.37189e+06	1.82018e+06
204.111	9.27423	N6-Acetyl-N6-hydroxy-L-lysine	Amino Acid Metabolism	261329	122603	356059	383196
204.111	17.8698	N6-Acetyl-N6-hydroxy-L-lysine	Amino Acid Metabolism	144589	165600	155441	175418
206.09	11.7532	N-hydroxy DAP		555979	348019	769105	1.29634e+06
206.167	4.34793	alpha-Irone		1.7552e+06	1.71795e+06	1.67367e+06	1.61157e+06
206.167	6.79773	4-Octylphenol		478077	476810	504221	468030
207.09	4.83976	N-Acetyl-L-phenylalanine	Amino Acid Metabolism	NA	NA	NA	122875
208.182	5.08725	FA (14:2) tetradecadienal	Lipid Metabolism	1.38865e+06	1.64013e+06	1.28417e+06	954876
208.182	6.06033	6,10-Dimethyl-9-methylene-5-undecen-2-one	Lipid Metabolism	582435	742061	734687	693376
209.069	4.44749	N-Benzyloxycarbonylglycine		978351	1.1063e+06	977391	972698
212.009	12.2119	P-DPD		37037.1	96705.4	41714.4	39649.3
212.009	15.0872	phosphinomethylisomalate		290221	287785	262755	379614
212.009	13.4577	phosphinomethylmalate		157182	137804	111041	72716.9
213.111	14.1574	Methyl 2-diazoacetamidohexonate		157689	455174	251597	280355
214.132	8.48377	Dethiobiotin	Metabolism of Cofactors and Vitamins	1.83986e+06	1.02683e+06	1.72164e+06	2.45254e+06
214.193	4.05336	Tridecanoic acid	Lipid Metabolism	192779	238912	198852	249735
215.056	15.62	sn-glycero-3-Phosphoethanolamine	Lipid Metabolism	83374.7	185923	103135	342331
216.111	11.2954	gamma-Glutamyl-gamma-aminobutyraldehyde	Amino Acid Metabolism	1.03176e+07	5.76061e+06	18700000	40800000
216.136	4.4179	Undecanedioic acid	Lipid Metabolism	331756	324274	377086	380044
216.148	7.81893	Valyl-Valine	Peptide	213271	149537	316568	472389
217.106	12.0317	N-a-Acetylcitrulline	Amino Acid Metabolism	666359	255455	966113	1.67618e+06
217.131	9.83311	Propionylcarnitine	Lipid Metabolism	163509	265666	200910	210651
217.143	16.5171	beta-Alanyl-L-lysine	Amino Acid Metabolism	244296	118230	502508	390280
218.09	14.0199	Glutamylalanine		95233.5	56469.3	146767	1.29345e+06
218.09	14.8256	gamma-Glutamylalanine	Peptide	553212	264836	621193	6200236
218.127	8.03405	Isoleucyl-Serine	Peptide	1.21539e+06	535341	1.9623e+06	2.12131e+06
218.127	17.1262	Lysopine	Amino Acid Metabolism	132448	124394	181662	180157
219.086	13.3315	Asparaginyl-Serine	Peptide	1.24008e+06	784811	1.40297e+06	725231
219.994	4.1995	Isophosphamide mustard		111056	124799	139019	119636
220.07	15.3643	beta-aspartyl-L-serine	Peptide	718340	394084	936395	1.84931e+06
220.106	10.92	3-[4-amino-3-hydroxybutyl]-hydroxy-carbamoyl-propanoate		862870	395214	1.26202e+06	4.01664e+06
221.09	11.954	N-Acetyl-D-glucosamine	Amino Acid Metabolism	57595.5	632001	125785	1.04938e+06
222.089	7.80871	Apiole		525458	592693	453859	559787
222.1	7.85884	Phenylalanyl-Glycine	Peptide	200891	89119.3	272563	602530
222.162	4.09864	Rishitin		576581	589874	759367	589294
222.162	7.59015	Rishitin		162009	157229	172265	160811
224.091	9.46752	Temurin		167765	115197	122204	377759
225.064	12.58	4-Amino-4-deoxychorismate	Metabolism of Cofactors and Vitamins	84747.9	141243	73177.7	66099.2
225.1	4.48397	2-amino-3-(4-hydroxy-3-methoxyphenyl)-2-methylpropanoic acid		391746	371383	418745	537056
226.107	11.7455	6-(L-Erythro-1,2-Dihydroxypropyl)-5,6,7,8-tetrahydro-4a-hydroxypterin		4.17506e+06	1.71636e+06	5.63513e+06	4.43399e+06
226.107	10.8508	6-(L-Erythro-1,2-Dihydroxypropyl)-5,6,7,8-tetrahydro-4a-hydroxypterin		2.96781e+06	1.53368e+06	2.58473e+06	5587871
228.147	7.88692	Isoleucylproline	Peptide	3.5283e+06	1.68718e+06	4.05089e+06	2502621
228.148	10.2797	Leucylproline	Peptide	325689	920581	592981	706792
228.209	4.0082	Myristic acid	Fatty Acyls [FA]_Lipid Metabolism	6.89701e+06	6.56688e+06	5823267	9.19582e+06
229.088	14.7383	Ergothioneine	Amino Acid Metabolism	1.34093e+06	7.52631e+06	2.05575e+06	2.08407e+06
229.106	12.9775	Asparaginyl-Proline	Peptide	1.15954e+07	7.42654e+06	1.70333e+07	1.47333e+08
230.019	15.2554	Ribose 5-phosphate	Carbohydrate Metabolism	111632	158179	124323	245785
230.09	15.1126	Aspartyl-L-proline	Peptide	3.24333e+07	23831209	9.91333e+07	2.88667e+08
230.163	7.79535	Isoleucyl-Valine	Peptide	643942	130273	1.00325e+06	1.53791e+06
231.111	12.977	Isovalerylglutamic acid		157845	91542.2	219608	1.65015e+06
231.122	10.1719	Ala/Ala/Ala	Peptide	720709	352287	1.14523e+06	1.73877e+06
231.133	16.9835	Glycyl-Arginine	Peptide	257951	172075	333892	133291
231.627	11.0172	Ala/Phe/Ala/Arg	Peptide	984072	825975	1.48896e+06	832595
232.069	13.7839	kifunensine		75482.2	81367	111888	473325
232.095	15.105	Glycerol 1-propanoate diacetate		435799	355426	1.28891e+06	3.72946e+06
232.106	13.2323	N2-Succinyl-L-ornithine	Amino Acid Metabolism	1.31923e+06	954958	1.54686e+06	20000000
232.106	12.5236	N6-Acetyl-LL-2,6-diaminoheptanedioate	Amino Acid Metabolism	362753	175563	492169	6.17912e+06
232.142	7.85793	Isoleucyl-Threonine	Peptide	1.56752e+06	930544	2.24853e+06	1.79162e+06
233.101	12.3714	Ala/Gly/Ser	Peptide	2.30661e+06	868850	3059885	1.21667e+07
233.138	16.6188	Lysyl-Serine	Peptide	2.16422e+06	1.25108e+06	3.23316e+06	1.8794e+06
234.085	15.1872	beta-aspartyl-L-threonine	Peptide	867892	545495	926016	3.32813e+06
234.111	13.2109	ascr#11		29883.9	22419.8	42200.3	288833
236.105	4.34177	2-hydroxy-2-[4-hydroxy-3-(3-methylbut-2-en-1-yl)phenyl]acetic acid	Biosynthesis of Secondary Metabolites	542768	662174	776683	598863
237.031	16.8082	Cysteinosuccinic acid		137248	145986	116000	77514.3
238.098	10.3444	15(R)-hydroperoxy-EPE	Medium Component	196300000	3.15333e+08	1.79667e+08	3.69667e+08
238.099	9.57017	15(R)-hydroperoxy-EPE	Medium Component	7.36667e+07	112400000	62000000	9.89667e+07
238.12	3.99093	2,2,4,4,-Tetramethyl-6-(1-oxopropyl)-1,3,5-cyclohexanetrione		336882	361198	587649	403214
238.132	4.83355	Secobarbital		919949	884202	962968	962292
239.079	4.82112	2-{[(3,5-dimethoxyphenyl)(hydroxy)methylidene]amino}acetic acid		532719	623912	595793	667665
240.136	4.01229	avenolide		116058	114077	153008	120780
240.147	10.1842	Slaframine	Biosynthesis of Secondary Metabolites	415599	1.1679e+06	859556	992028
241.047	11.5478	Bretylium		30460.6	25687.1	13551.4	285199
241.635	18.0926	Ala/Ile/Pro/Pro/Ser	Peptide	829805	803196	779147	832781
242.019	16.6408	Inositol cyclic phosphate		520844	623440	528147	795936
242.079	7.73332	Genipinic acid		123470	120728	120330	406921
242.152	4.84749	2-isocapryloyl-hydroxymethyl--butyrolactone		638090	176613	487222	272521
242.225	3.97981	FA methyl(14:0)	Lipid Metabolism	1.85985e+06	1.82116e+06	1.56209e+06	2.54033e+06
243.086	11.1655	gamma-Glutamyl-beta-cyanoalanine	Amino Acid Metabolism	43736.4	36460.5	47242.1	59350.8
243.086	11.9336	Cytidine	Nucleotide Metabolism_Xenobiotics Biodegradation and Metabolism	823531	798252	556633	403489
243.122	12.3295	Ala/Gly/Pro	Peptide	3.32415e+06	1.79264e+06	4.06261e+06	10635625
243.158	15.3093	Lysyl-Proline	Peptide	5.9993e+06	3.59666e+06	13400000	1.16667e+08
244.106	14.784	dihydrothymidine		1.40667e+07	9.80009e+06	29000000	5.60333e+08
244.106	13.9335	Glutamylproline	Peptide	155198	73077.3	400304	1.16091e+07
244.178	4.83757	N-(6-Aminohexanoyl)-6-aminohexanoate		191385	101592	420223	294254
244.178	7.80207	Leucyl-Leucine	Peptide	48608	32895.7	95124.3	57845.1
245.138	8.60454	Ile/Gly/Gly	Peptide	980552	440838	1.65738e+06	2.25027e+06
245.138	9.3663	Isoleucyl-Asparagine	Peptide	737436	336286	1.21957e+06	4.53963e+06
245.149	16.474	beta-Alanyl-L-arginine	Amino Acid Metabolism	79080.4	48933.9	201323	294248
245.174	22.0287	Lysyl-Valine	Peptide	984227	915718	924428	943515
245.174	13.8422	Lysyl-Valine	Peptide	7.59917e+06	3.34162e+06	11293399	1.83333e+07
246.051	12.265	Glycerophosphoglycerol		543591	485281	479397	848255
246.085	12.5703	5,6-Dihydrouridine		76749.5	119573	134074	775402
246.085	13.3871	5,6-Dihydrouridine		121196	170119	319322	2386599
246.096	13.5477	Asparaginyl-Asparagine	Peptide	4.74587e+06	2.88652e+06	4.26999e+06	2.25736e+06
246.104	8.20733	9-mercaptodethiobiotin	Metabolism of Cofactors and Vitamins	355836	182561	407649	384603
246.122	12.64	beta-aspartyl-L-leucine	Peptide	967052	577267	1.07839e+06	3.39963e+06
246.122	11.4949	beta-aspartyl-L-leucine	Peptide	504188	265694	684477	2.92284e+06
246.137	8.83173	Lenticin		712453	2.11658e+06	1.43618e+06	1.5791e+06
247.069	13.584	N-Succinyl-L-glutamate	Amino Acid Metabolism	625930	418352	427800	94694.6
247.08	15.4253	Asparaginyl-Aspartic acid	Peptide	1.53559e+06	1.07585e+06	1.31633e+06	3.52189e+06
247.117	11.7311	Ala/Ala/Ser	Peptide	940369	490984	1.41853e+06	1.27667e+07
247.153	15.8444	Lysyl-Threonine	Peptide	1.17845e+06	569851	1.59589e+06	1.64393e+06
248.064	16.9441	Aspartyl-Aspartate	Peptide	913145	646147	981317	3112913
248.101	14.4992	Glutamylthreonine	Peptide	1.86565e+06	1.25169e+06	2.1421e+06	2.56208e+06
248.101	13.8822	Glutamylthreonine	Peptide	156493	105777	239866	675388
249.087	7.57132	Eucaglobulin		156956	192936	161829	800839
250.033	12.75	2-Propenyl [3-(2-propenylthio)-2-propenyl] sulfate		38965.1	57222.6	41139.4	21766.4
250.062	13.8239	gamma-Glutamylcysteine	Amino Acid Metabolism	1.04524e+06	972829	776546	824642
250.622	16.1698	Glu/Glu/Lys/Pro	Peptide	1.57565e+06	1.20767e+06	1.52967e+06	2.45096e+06
251.101	14.2454	Muramic acid		793334	1.04615e+06	795542	821983
252.111	7.87047	3-Hydroxyhexobarbital		209606	99349.3	366943	466455
252.122	11.9327	Prolyl-Histidine	Peptide	2.12456e+06	1.17286e+06	2.37974e+06	5.04123e+06
254.152	4.28447	Gallicynoic acid A		163235	190200	151313	176609
254.225	3.95975	Palmitoleic acid	Lipid Metabolism_Lipid Metabolism	702559	715504	761424	1.16562e+06
256.24	3.94307	Palmitic acid	Fatty Acyls [FA]_Lipid Metabolism	1.00633e+08	97000000	7.23333e+07	1.35667e+08
257.101	10.5701	5-Methylcytidine		162498	90570.9	123050	161482
257.103	14.4529	Glycerophosphocholine	Lipid Metabolism	2.30223e+06	4.77361e+06	3409898	9.13791e+06
257.138	15.2323	Ala/Ala/Pro	Peptide	54299.4	39177.7	61584.9	101288
257.199	4.54447	N-Lauroylglycine		68999.9	93274.9	20257.5	43510.4
258.122	11.3706	gamma-L-Glutamyl-L-pipecolic acid		12603	9162.68	22033.5	303613
259.046	16.1585	Glucosamine 6-phosphate	Amino Acid Metabolism	NA	2.49508e+06	NA	4.88811e+06
259.046	11.8376	glycerophosphoserine		NA	260023	NA	294845
259.153	8.14193	Ile/Ala/Gly	Peptide	458511	189727	892755	606453
259.189	12.6882	Isoleucyl-Lysine	Peptide	2.886e+06	867376	4384326	1.13637e+06
260	15.271	Caffeic acid 3-sulfate		92323.6	110010	81447.6	4387.69
260.012	12.4693	Methyl-5-thio-D-ribose 1-phosphate	Amino Acid Metabolism	64785.6	54819.7	39989.3	18207
260.03	14.8566	Hexose phosphate	Carbohydrate Metabolism	748665	1.08951e+06	804601	695828
260.03	16.7621	Glucose 6-phosphate	Carbohydrate Metabolism	873617	417927	690037	731789
260.03	15.6	Fructose 6-phosphate	Carbohydrate Metabolism	86710.9	104494	127772	315666
260.112	12.6636	Ala/Gly/Gly/Gly	Peptide	949376	559642	1.09732e+06	915379
260.112	13.2149	Ala/Asn/Gly	Peptide	1.61973e+06	894505	2188046	1.01215e+06
260.137	6.94019	gamma-Glutamylleucine	Peptide	204835	105902	402992	606533
260.137	11.0946	gamma-Glutamylisoleucine	Peptide	900899	510127	1.34456e+06	2.04552e+06
260.148	16.5159	Lysyl-Asparagine	Peptide	7.80284e+06	4.21242e+06	9.18069e+06	2.07194e+06
261.096	15.1725	Ala/Asp/Gly	Peptide	1.25785e+06	840284	1.20064e+06	2.46573e+06
261.121	12.7149	Lotaustralin		870739	1.31915e+06	894066	900660
261.132	16.2882	Gamma glutamyl ornithine	Peptide	929125	655922	895193	1.17392e+06
261.143	16.5584	Serylarginine	Peptide	592911	325680	1.25624e+06	833095
261.158	10.724	hydroxyisovaleroyl carnitine		179312	330012	226642	273974
262.045	14.8901	Sorbitol-6-phosphate	Carbohydrate Metabolism	430888	571631	466467	544870
262.08	13.8888	beta-aspartyl-L-glutamic acid	Peptide	240429	498745	697699	1.1112e+07
262.08	16.8976	beta-aspartyl-L-glutamic acid	Peptide	495493	356872	515262	834586
263.094	9.36009	Ala/Ala/Cys	Peptide	62824.5	40484.3	129211	164078
264.078	12.255	N-Acetylcystathionine		74313.2	41847	107174	48427.6
265.858	27.2085	3,5-dibromocatechol		157400	181429	161448	156636
265.959	17.7599	2,3-Diphosphoglyceric acid	Carbohydrate Metabolism	107054	571377	110622	155223
266.115	4.36528	3',4',5'-Trimethoxycinnamyl alcohol acetate		58100000	5.82667e+07	69600000	6.56333e+07
266.115	5.15101	3',4',5'-Trimethoxycinnamyl alcohol acetate		1.47333e+07	1.51667e+07	16300000	16500000
266.115	5.93927	3',4',5'-Trimethoxycinnamyl alcohol acetate		5.3508e+06	6.23262e+06	6693733	6.24579e+06
266.127	7.87878	Phenylalanyl-Threonine	Peptide	48236.4	NA	151376	1.35955e+06
266.155	3.78646	sodium dodecyl sulfate		3450399	4.3598e+06	4.23549e+06	6.79809e+06
266.165	4.14629	Tributyl phosphate		701021	635166	590249	509189
267.096	16.4276	Neuraminic acid		NA	135488	NA	NA
267.097	9.23154	Adenosine	Nucleotide Metabolism	471495	379416	315283	328156
268.081	10.9105	Inosine	Nucleotide Metabolism	117761	76955.8	117416	249627
268.106	10.493	Seryltyrosine	Peptide	44244.3	26089.5	63512.8	65935.1
268.121	4.34093	N-Butyl-beta-carboline-3-carboxylate		1.25359e+06	1.18511e+06	1.41681e+06	1.28918e+06
268.153	7.8749	Histidinyl-Leucine	Peptide	491280	167720	752751	1.69583e+06
268.24	3.96722	FA methyl(16:1)	Lipid Metabolism	223270	235764	234006	324669
269.09	4.75276	2-{[hydroxy(2,3,4-trimethoxyphenyl)methylidene]amino}acetic acid		141824	127880	182350	196868
269.112	12.5667	formycin A		3838865	1.35131e+06	4.44559e+06	3.97741e+06
270.097	14.6156	6-Hydroxyl-1,6-dihydropurine ribonucleoside		1.29006e+06	781377	986020	2067167
270.219	4.0021	FA oxo(16:0)	Lipid Metabolism	305476	258812	291817	315582
270.256	3.91735	Heptadecanoic acid	Fatty Acyls [FA]_Lipid Metabolism	3.43842e+06	2.94515e+06	2788863	4.15532e+06
271.164	15.3264	Prolyl-Arginine	Peptide	1.60932e+06	818363	2.16612e+06	1.88433e+06
272.03	15.9425	(2,6-anhydro-3-deoxy-D-arabino-heptulopyranosid)onate 7-phosphate		708828	860694	865388	509317
272.235	3.98814	2-Hydroxyhexadecanoic acid	Lipid Metabolism	269912	248821	181638	241006
273.085	12.0987	Brugine		267547	771370	386388	368955
273.18	13.6196	Valyl-Arginine	Peptide	2.54589e+06	1.16852e+06	4.67386e+06	1.42956e+06
274.128	12.6638	N2-Succinoylarginine	Amino Acid Metabolism	1.20109e+06	393416	1.76715e+06	1.10013e+06
274.164	16.2876	Lys/Ala/Gly	Peptide	167146	113458	352846	351451
275.065	12.0893	3-beta-D-Glucopyranuronosyloxy-5-methylisoxazole		41052.7	15674.2	50364.3	65622.2
275.094	10.5716	Cys/Gly/Pro	Peptide	295856	632097	487601	453720
275.112	14.8779	N2-gamma-Glutamylglutamine	Peptide	940768	592745	1.27331e+06	1.31261e+06
275.148	16.6814	Glutamyllysine	Peptide	667846	496770	689001	587705
275.148	15.2531	Epsilon-(gamma-Glutamyl)-lysine		64647	88029.4	133954	878665
275.16	15.6963	Threoninyl-Arginine	Peptide	361335	162738	611224	307086
276.025	16.6735	6-Phosphogluconic acid	Carbohydrate Metabolism	91573.8	127065	81117.6	86845.4
276.096	16.7996	2,3-diacetamido-2,3-dideoxy--D-mannuronate		992346	716809	1.27433e+06	7.42329e+06
276.096	13.5575	2,3-diacetamido-2,3-dideoxy--D-mannuronate		49152.6	139529	96999.6	3657232
277.11	12.6649	Met/Ala/Gly	Peptide	269850	685740	529838	643577
277.116	12.2491	N-(1-Deoxy-1-fructosyl)proline		497473	351364	360770	679376
277.127	16.6306	Thr/Ala/Ser	Peptide	49726.2	34033.4	87519.5	29159.4
277.996	15.0461	2-C-methyl-D-erythritol-2,4-cyclodiphosphate		424138	276819	442409	609172
278.094	11.8954	Glutamylmethionine	Peptide	37986.4	29268.7	60798.5	36907
278.094	11.9119	Ovalitenin A	Lipid Metabolism	80452.9	37726.4	148224	94479.4
278.127	9.77936	N1-(alpha-D-ribosyl)-5,6-dimethyl-benzimidazole	Metabolism of Cofactors and Vitamins	453971	212140	692405	386033
278.152	4.1366	Monoethylhexyl phthalic acid		1.49373e+06	1.18113e+06	1.43042e+06	1.07104e+06
278.164	4.71087	Isoleucyl-Phenylalanine	Peptide	83485.2	41107.2	198924	260174
278.188	4.01124	1-(4-Hydroxy-3-methoxyphenyl)-3-decanone		237388	253023	223399	263252
278.225	3.93811	FA (18:3)	Lipid Metabolism	281302	261214	239826	275710
279.122	8.02314	Phenylalanyl-Asparagine	Peptide	215400	112344	383736	667403
280.095	4.35353	Gravolenic acid		2.89146e+06	2.76986e+06	2.57668e+06	3.09095e+06
280.106	10.6532	Phenylalanyl-Aspartate	Peptide	381974	204118	400686	2133916
280.182	9.22882	Callyspongenol D		321920	327899	317430	365259
280.24	3.91944	FA (18:2)	Lipid Metabolism	2.87803e+06	2.8576e+06	2.42505e+06	2.65553e+06
281.112	10.7415	N-(1-Deoxy-1-fructosyl)threonine		347280	194066	288675	472949
282.083	11.292	adenosine-N-oxide		88211.8	65306.5	171872	291752
282.11	4.82016	2-[4,6-dihydroxy-3-(4-hydroxy-3-methylbut-2-en-1-yl)-2-methoxyphenyl]acetic acid		62874.9	45017.9	70969.6	79410.3
282.121	9.5518	Threoninyl-Tyrosine	Peptide	72966	35136.2	161525	340558
282.256	3.90901	octadecenoic acid	Lipid Metabolism	1.43667e+07	1.10858e+07	1.09333e+07	1.12333e+07
283.157	9.62698	6,7-Dihydro-4-(hydroxymethyl)-2-(p-hydroxyphenethyl)-7-methyl-5H-2-pyrindinium		658237	957480	377695	546509
283.157	10.3754	6,7-Dihydro-4-(hydroxymethyl)-2-(p-hydroxyphenethyl)-7-methyl-5H-2-pyrindinium		1.07162e+06	1.74061e+06	663888	836755
283.164	16.1594	Lysyl-Histidine	Peptide	2.40424e+06	1.24353e+06	3.37838e+06	5.82227e+06
284.112	14.3547	Coformycin		2.73874e+06	1.67154e+06	2.52477e+06	4.38436e+06
284.126	7.85044	2-Phenylethyl beta-D-glucopyranoside		561000000	6.56667e+08	7.72967e+08	7.18333e+08
284.126	5.41811	2-Phenylethyl beta-D-glucopyranoside		2.92791e+07	3.93667e+07	3.23649e+07	3.54667e+07
284.126	7.37876	2-Phenylethyl beta-D-glucopyranoside		5.39665e+07	46400000	5.68756e+07	49600000
284.126	6.95422	2-Phenylethyl beta-D-glucopyranoside		3.56359e+07	49500000	5.35903e+07	5.17333e+07
284.272	3.90073	Stearic acid	Fatty Acyls [FA]_Lipid Metabolism	9.05333e+07	89500000	6.86667e+07	1.42667e+08
285.129	5.3095	Isothipendyl		4.80579e+06	6.45816e+06	5.47954e+06	5.84655e+06
285.129	7.0611	Isothipendyl		5.64239e+06	6.84089e+06	8.98679e+06	8.25576e+06
286.131	7.85166	Pilosine		1.20966e+07	14634592	1.64572e+07	1.54088e+07
286.131	7.16531	Levcromakalim	Xenobiotics Biodegradation and Metabolism	883083	1.96872e+06	1.28668e+06	1.20806e+06
287.148	15.356	Thr/Ala/Pro	Peptide	691234	423834	1.58738e+06	1.30333e+07
287.196	12.5722	Isoleucyl-Arginine	Peptide	748009	254796	1.73391e+06	931218
287.246	5.87997	(8-hydroxydecyl)-(hydroxymethyl)-piperidin-ol	Lipid Metabolism	2.27859e+06	2.49207e+06	2.66061e+06	2.46181e+06
287.246	4.18871	(8-hydroxydecyl)-(hydroxymethyl)-piperidin-ol	Lipid Metabolism	7.32247e+06	8529070	6.55113e+06	6.13489e+06
287.246	5.33206	(8-hydroxydecyl)-(hydroxymethyl)-piperidin-ol	Lipid Metabolism	3.69196e+06	4.75121e+06	3.50107e+06	3.18637e+06
287.246	4.83933	(8-hydroxydecyl)-(hydroxymethyl)-piperidin-ol	Lipid Metabolism	4546898	5.62e+06	4.33212e+06	3.76083e+06
288.059	11.7373	Orotidine		55002.1	114674	77562.7	119326
288.155	16.4463	Asparaginyl-Arginine	Peptide	2906146	1.43645e+06	3.87378e+06	1.3947e+06
289.127	12.4324	Glu/Ala/Ala	Peptide	269075	212158	427518	350400
289.127	13.1389	Ophthalmic acid		764246	787686	996684	802765
289.139	16.8135	Aspartyl-Arginine	Peptide	287200	261087	296176	115906
289.163	13.8212	Ile/Ala/Ser	Peptide	368027	156678	420399	868372
289.164	9.04555	Ile/Ala/Ser	Peptide	100957	113536	99534.2	116070
290.04	15.938	Sedoheptulose 7-phosphate(2-)	Carbohydrate Metabolism	1.32702e+06	1.59963e+06	1.65967e+06	1.138e+06
290.065	12.4509	Dedimethylchlorpromazine		35079.8	25524.5	52334.3	425177
290.123	16.5722	N-(L-Arginino)succinate	Amino Acid Metabolism	265161	336811	238008	235102
291.095	12.1618	2-Deoxy-2,3-dehydro-N-acetylneuraminic acid		185412	506699	256046	242251
291.095	12.7167	2,7-Anhydro-alpha-N-acetylneuraminic acid		262970	585559	268276	253692
291.107	15.4333	Ala/Asp/Ser	Peptide	295737	268107	466289	402254
291.125	10.9865	Ile/Cys/Gly	Peptide	134051	251037	218654	226588
291.143	15.8135	Thr/Thr/Ala	Peptide	113965	60530.3	138143	139829
292.077	16.5912	(1,3-diphenylpropoxy)sulfonic acid		291306	384316	286513	288710
292.204	4.23203	8-hydroxy-17-octadecadien-9-ynoic acid	Fatty Acyls [FA]_Lipid Metabolism	1.35088e+06	1.41958e+06	1.46915e+06	1.41557e+06
293.174	11.8705	Lysyl-Phenylalanine	Peptide	106347	61792	244418	255564
294.073	11.2838	cyclic dehypoxanthinylfutalosine		50971.9	17767.1	92067.5	347930
294.183	7.75207	Embelin		950613	917311	1.00708e+06	1.0176e+06
294.183	4.01332	Phytuberin		5.1216e+06	4427436	6.93512e+06	5.79052e+06
295.117	10.6395	Asparaginyl-Tyrosine	Peptide	499608	268124	575819	372811
296.101	13.8455	4-Nitrophenyl-3-ketovalidamine		943598	717512	948458	462688
297.089	7.89471	5'-Methylthioadenosine	Amino Acid Metabolism	1.12032e+06	1.15106e+06	1.39868e+06	3.51715e+06
297.18	21.516	Diphthamide		171982	179697	172404	199459
298.16	3.81778	2-(4-sulfophenyl)decane		1.58288e+06	3.36956e+06	1.37796e+06	4.214e+06
298.251	3.95828	3-Oxooctadecanoic acid	Fatty Acyls [FA]_Lipid Metabolism	622057	571511	526938	840148
298.287	3.87166	Tuberculostearic acid	Lipid Metabolism	313620	319643	290982	506867
299.077	14.7831	4'-Phosphopantothenate	Metabolism of Cofactors and Vitamins	161917	139277	182149	283049
300.073	10.4068	diazaborine		356660	376052	348980	249219
300.099	9.6918	6,7-Dihydroxy-5,4'-dimethoxy-flavylium	Lipid Metabolism	346234	491265	332115	642287
300.099	10.3815	6,7-Dihydroxy-5,4'-dimethoxy-flavylium	Lipid Metabolism	704839	1.19354e+06	641695	1.31297e+06
300.121	7.85496	Salidroside	Amino Acid Metabolism	1.07517e+06	1.3462e+06	1.50635e+06	2.15861e+06
300.144	12.1597	Ala/Asn/Pro	Peptide	26949	35622.9	59147.4	1.83564e+06
300.267	4.009	2-Hydroxystearic acid	Fatty Acyls [FA]_Lipid Metabolism	649679	683077	676158	742642
301.056	14.7175	N-Acetylglucosamine 6-phosphate	Amino Acid Metabolism	38141	962466	38780.2	1.29929e+06
301.081	12.3317	4-Nitrophenol-alpha-D-galactopyranoside		41211.2	12722.4	69818.7	121508
301.127	14.5125	Ala/Asp/Pro	Peptide	388514	309973	424296	1.01417e+07
301.128	13.909	Glu/Gly/Pro	Peptide	2986.22	NA	13481.5	317442
302.06	14.8991	PIPES	Medium Component	NA	100078	NA	124924
302.061	13.8655	PIPES	Medium Component	1.14118e+06	1.15066e+06	1.06854e+06	1.10448e+06
302.159	9.31634	Neuromedin B (1-3)		64294.8	41863.3	82066.3	49865.8
303.106	13.9607	Fenamiphos		112381	59552.6	104838	512199
303.143	12.2944	Glu/Gly/Val	Peptide	28212.3	19499.7	49931.9	57439.8
303.154	16.5969	Glutamylarginine	Peptide	1.58729e+06	958185	1.70999e+06	777054
303.18	12.692	Ile/Ala/Thr	Peptide	227323	102095	308562	55653.3
303.293	8.05227	benzalkonium		216954	309283	293491	437358
304.08	12.5848	Demonomethylchlorpromazine		55373.6	29807.6	58528.7	146760
304.139	16.4966	Nopaline	Amino Acid Metabolism	128218	87957.2	137899	NA
304.241	3.94019	kauralexin A1		933711	686852	545055	497389
305.086	17.7894	Asp/Asp/Gly	Peptide	205557	262124	175983	164426
305.122	14.7339	Glu/Ala/Ser	Peptide	660030	922206	945295	936952
305.137	7.88571	Threoninyl-Tryptophan	Peptide	NA	NA	NA	952575
306.052	11.7185	N-(4-oxoglutaryl)-L-cysteinylglycine		60371.8	98430.6	60913.5	46954.5
306.052	17.7109	N-(4-oxoglutaryl)-L-cysteinylglycine		NA	16622.3	41555.3	1.25933e+06
307.084	14.0455	Glutathione	Amino Acid Metabolism	8.55333e+07	9.42333e+07	8.79667e+07	5.98667e+07
308.069	14.6734	Neodulin	Lipid Metabolism	17849.2	29136.1	33612.7	548680
308.158	21.2092	psicoselysine		403982	425227	397036	608878
309.132	7.89142	Ala/Gly/Tyr	Peptide	398956	249713	465335	715163
309.133	9.91424	Ala/Gly/Tyr	Peptide	251900	115879	348032	702303
309.169	14.3201	Lysyl-Tyrosine	Peptide	361728	199758	672587	442848
310.089	14.6185	6-[2-carboxy-2-(hydroxymethyl)-2-methylethoxy]-3,4,5-trihydroxyoxane-2-carboxylic acid		262083	223413	305813	138620
310.105	4.34093	1-O-Cinnamoyl-beta-D-glucose		256108	241752	308661	281453
310.116	13.2515	gamma-Glutamyltyrosine	Peptide	1.03399e+06	632289	1.02329e+06	558682
310.117	12.4648	Glutamyltyrosine	Peptide	229348	102737	281522	115934
310.179	3.99835	Botrydial	Lipid Metabolism	766358	785902	1.07592e+06	878451
310.287	3.87013	Eicosenoic acid	Lipid Metabolism	319423	239508	242575	290683
312.022	15.9477	Gamma-Glutamyl-Se-methylselenocysteine	Amino Acid Metabolism	947043	1.00829e+06	1.21929e+06	665188
312.047	12.4924	Caftaric acid		NA	NA	NA	116457
312.176	3.7976	N-Undecylbenzenesulfonic acid		5.42119e+06	9.31752e+06	4.64465e+06	1.24333e+07
312.194	4.17732	4-acetoxy-10,15-dihydroxyprobotryane		164555	154065	149952	180705
312.303	3.86322	Arachidic acid	Fatty Acyls [FA]_Lipid Metabolism	1.39497e+06	1.38157e+06	1.21251e+06	2.15169e+06
315.143	14.3013	Glu/Ala/Pro	Peptide	284391	201748	305654	6.62018e+06
315.154	15.3805	N-acetyl-L-glutaminyl-L-glutamine amide		499302	297601	617807	655720
316.186	13.8779	Ala/Ala/Arg	Peptide	340394	202942	415516	NA
316.262	4.18876	FA hydroxy(18:0)	Fatty Acyls [FA]_Lipid Metabolism	103800	136721	118369	131225
317.138	9.4611	Hydroxyprolyl-Tryptophan		155994	37513.7	158966	994446
317.159	10.7474	Glu/Ala/Val	Peptide	175989	143255	255927	2.49161e+06
317.174	4.82918	Isoleucyl-Tryptophan	Peptide	27802.3	NA	84621.9	69984.7
318.065	15.548	Melanin	Amino Acid Metabolism	1.1991e+06	1.14774e+06	980244	1.48545e+06
318.133	9.75636	Tryptophyl-Asparagine	Peptide	457369	266933	723280	947972
318.154	16.0591	Ala/Ala/Ala/Ser	Peptide	305218	285830	324201	417947
320.045	10.2369	8-Chloro-5,7,4'-trihydroxy-3-C-methylflavanone	Lipid Metabolism	98456.6	112821	105581	97222.8
320.103	5.44004	methyl phosphate		685134	917374	792524	773282
320.122	14.7254	3-Epihydroxy-2'-deoxymugineic acid		NA	1.26863e+06	NA	520646
321.069	19.3868	Beta-Citryl-L-glutamic acid		158680	193907	119990	97168.1
321.1	12.5982	dehydrocheilanthifoline		138254	139340	175449	125436
321.18	11.7461	Phenylalanyl-Arginine	Peptide	42832.7	26761.1	86731.3	127575
322.057	12.4858	16-bromo-hexadecadien-5,13-diynoic acid	Lipid Metabolism	671251	371607	380869	181491
322.137	15.9024	2'-deamino-2'-hydroxy-6'-dehydroparomamine		NA	152783	NA	333147
322.138	15.0686	Avenic acid A		181755	459407	203843	575909
323.052	15.5497	Cytidine monophosphate	Nucleotide Metabolism	1.14672e+06	624263	941628	421132
324.036	14.7885	3'-UMP	Nucleotide Metabolism	6.88335e+06	4.14222e+06	5.44306e+06	2.01513e+06
324.105	14.5196	Bis-D-fructose 2',1:2,1'-dianhydride		236223	313526	256328	126764
325.175	9.91783	Ile/Gly/His	Peptide	23740.1	NA	47558.7	171699
326.123	12.6656	6,7-Dimethyl-8-(1-D-ribityl)lumazine	Metabolism of Cofactors and Vitamins	2087799	1.06295e+06	1.90495e+06	1.23258e+06
326.192	3.77883	2-Dodecylbenzenesulfonic acid		4.96848e+06	8.21796e+06	4.16293e+06	1.25333e+07
327.179	21.5974	glorin		NA	367782	NA	617601
328.175	10.0217	Ala/Ala/Ala/Pro	Peptide	269387	163396	269263	1.33205e+06
329.159	12.4344	Valclavam		NA	NA	11512.1	490830
329.184	7.89854	Europine		4.22685e+06	5.75008e+06	2.11344e+06	2.3491e+06
330.157	22.8191	quinocarcin		194550	139551	185532	150241
331.068	12.4987	Deoxyadenosine monophosphate	Nucleotide Metabolism	1.17735e+06	600077	880717	710820
332.17	14.7235	Ala/Thr/Ala/Ala	Peptide	890759	481378	812369	1.01359e+06
333.154	11.0677	Glu/Ser/Val	Peptide	186822	133551	176216	458770
334.057	15.1343	Nicotinamide ribotide	Metabolism of Cofactors and Vitamins	567809	606458	553041	859669
334.067	15.8374	1-(sn-Glycero-3-phospho)-myo-inositol		212001	299584	244877	554060
335.133	15.88	Glu/Ser/Thr	Peptide	200237	185272	192057	212741
336.165	18.2286	N2-Fructopyranosylarginine		243435	229251	159693	263096
336.177	22.8058	Japonin		191514	124361	181421	152173
337.175	14.1714	Kyotorphin	Peptide	164670	120381	287355	342530
338.112	11.7027	4-O--D-glucosyl-indol-3-yl formamide		NA	NA	NA	226605
339.074	16.7146	glutathione sulfinate		276358	293847	314678	236668
340.186	15.8099	Lys/Gly/His	Peptide	46035.4	NA	90755.1	242214
340.189	4.60721	11-dehydro-2,3-dinor-TXB2	Lipid Metabolism	176704	157020	198312	95774.7
340.334	3.83532	C22-mycosanoate		324470	331520	272134	387500
341.162	10.3822	Magnoflorine		1.28915e+06	1.43693e+06	1.23315e+06	1.59444e+06
342.19	9.56942	Ala/Val/Gly/Pro	Peptide	307646	313624	314664	2.05552e+06
344.134	15.3865	Asp/Gly/Gly/Pro	Peptide	NA	NA	NA	321976
346.149	13.1899	Ala/Ala/Ala/Asp	Peptide	26033.7	15187.2	40854.6	816103
347.063	13.496	Adenosine monophosphate	Nucleotide Metabolism	8.34667e+07	5.85333e+07	61800000	3.90667e+07
347.063	12.4492	Guanosine 2',3'-cyclic phosphate	Nucleotide Metabolism	3.01361e+06	2.40969e+06	1.9531e+06	917175
347.122	13.8586	Dide-O-methylsimmondsin		173647	175495	192148	252900
347.133	15.7837	Glu/Ala/Glu	Peptide	552463	346674	497846	6.80943e+06
348.047	15.1347	dXMP		3.29555e+06	3.67836e+06	2.4407e+06	2.65458e+06
352.204	15.5084	Methyl -8'-oxo-6,8'-diapo-6-carotenoate		239285	251920	312860	237767
353.098	16.6333	4-(4-Chlorophenyl)-1-[4-(4-fluorophenyl)-4-oxobutyl]-pyridinium (HPP+)		52160	30339.4	74929.4	35427.5
353.293	3.87193	N-palmitoyl proline	Lipid Metabolism	1.08317e+06	1.13717e+06	1.16404e+06	1.05217e+06
354.056	7.8406	Phenolsulfonphthalein	Medium Component	8.33053e+06	7729822	8.84734e+06	1.11692e+07
356.206	13.1118	Ala/Leu/Gly/Pro	Peptide	13916.4	NA	20793.3	135150
358.126	16.5034	Tarennoside		161064	99254.5	195104	29903.9
358.149	15.1943	Ala/Asp/Gly/Pro	Peptide	194205	132877	245067	3.97593e+06
358.157	22.8143	2-{4-[-1,2-diphenylbut-1-en-1-yl]phenoxy}acetic acid		217485	131826	223110	177518
359.133	16.6057	Glu/Asp/Pro	Peptide	NA	14147.2	26670.8	766020
359.216	14.1957	Ala/Lys/Ala/Ala	Peptide	330416	202000	531080	944690
360.139	14.5464	Asn/Asn/Gly/Gly	Peptide	105894	34897.5	149791	121517
360.164	12.1966	Ala/Pro/Ser/Ser	Peptide	83384.5	53846.2	100449	134790
360.201	13.9118	Ala/Leu/Ala/Ser	Peptide	138345	56381.9	219058	256891
361.124	15.8408	Asn/Asn/Asp	Peptide	141272	84199.9	119373	246640
361.148	15.5582	Ile/Asp/Asp	Peptide	73392.7	40051.2	89265.4	1.59695e+06
362.144	15.144	Ala/Ala/Asp/Ser	Peptide	319452	333183	595095	1.003e+06
363.058	16.3666	Guanosine 3'-phosphate	Nucleotide Metabolism	2.39327e+06	1.45595e+06	1.71264e+06	1.05055e+06
363.058	16.3722	guanosine 2'-monophosphate		1.61401e+06	969730	1.22969e+06	849908
365.125	13.1052	Glu/Met/Ser	Peptide	195533	339593	91872.3	99508.1
365.206	11.4719	Ile/His/Pro	Peptide	52873.3	52287.8	98763.9	68076
368.366	3.8136	Tetracosanoic acid	Fatty Acyls [FA]_Lipid Metabolism	118289	187123	123444	240060
369.165	12.3359	Val/Asp/His	Peptide	62211.6	25720.9	93688.4	920886
371.148	13.8776	Isradipine		290875	222700	385487	478610
372.164	14.7753	Ala/Ala/Asp/Pro	Peptide	NA	NA	NA	614219
373.148	16.4617	Glu/Glu/Pro	Peptide	1.34889e+06	1.02078e+06	1.88413e+06	6.87667e+07
373.207	14.8885	Ala/Ala/Gly/Arg	Peptide	231691	197547	238360	NA
374.064	16.8242	Gossypetin 7-methyl ether 8-acetate	Lipid Metabolism	25079.3	16015.9	30665.6	207024
374.216	14.6156	Ala/Leu/Thr/Ala	Peptide	665284	665925	647731	664156
375.154	16.4775	Trp/Gly/Gly/Gly	Peptide	NA	NA	1910.82	196483
375.165	14.6937	Glu/Asp/Ile	Peptide	14340.4	4023.07	15160.9	100507
375.212	15.2456	Ala/Lys/Ala/Ser	Peptide	67687.9	53483.3	160734	648095
376.122	17.035	2-[4-(4-chloro-1,2-diphenylbut-1-en-1-yl)phenoxy]acetaldehyde		22787.7	26470.4	23798.4	217286
376.123	17.0073	Ala/Asp/Asp/Gly	Peptide	13497.7	8404.22	15233.7	89937.5
376.159	16.5397	Asp/Val/Gly/Ser	Peptide	77473.3	62845.9	71509.7	312358
376.159	15.0623	Ala/Thr/Ala/Asp	Peptide	221684	306417	972737	2.40337e+06
379.141	11.9001	Glu/Met/Thr	Peptide	89115.7	150456	13996.9	20809.4
381.023	16.5265	N-Acetyl-D-glucosamine 1,6-bisphosphate		NA	84137.3	1649.96	39953.9
381.264	4.85522	Sphinganine 1-phosphate	Lipid Metabolism	29073.8	65249	108564	146869
383.107	14.1485	Succinyladenosine		832327	542667	659366	476839
383.143	13.7735	N-Acetyllactosamine		296882	318975	312794	344300
383.18	10.784	Asn/Gly/Pro/Pro	Peptide	530827	401119	660593	1.97303e+06
384.122	13.6326	Adenosylhomocysteine	Amino Acid Metabolism	1.8299e+06	1.25058e+06	1.53016e+06	2.05452e+06
384.126	15.1678	Acetyl-maltose		94459.6	69990.9	185067	137480
385.152	10.3828	(13S,14R)-1,13-dihydroxy-N-methylcanadine		NA	5766.4	NA	130426
386.08	10.2016	7-(4-Carboxybutanamido)cephalosporanate	Biosynthesis of Secondary Metabolites	32298.7	94891.4	63470.5	54924.7
386.173	4.34261	Burseran		49200000	47100000	5.68667e+07	5.42667e+07
388.125	16.2228	Sulfinpyrazone sulfide		882183	700334	818793	545323
388.179	6.14461	Ala/Met/Ala/Pro	Peptide	6.08633e+06	5.78884e+06	8562349	7.94143e+06
389.191	16.0735	Ala/Thr/Ala/Gln	Peptide	185588	117457	290558	275784
390.139	16.7921	Ala/Ala/Asp/Asp	Peptide	54917.7	38818.2	66865.4	186428
390.175	14.9652	Ala/Val/Asp/Ser	Peptide	NA	NA	38053.5	1.07902e+06
390.175	12.1783	Ala/Val/Asp/Ser	Peptide	110905	76912.3	123942	76400.5
390.277	4.10835	9'-Carboxy-alpha-chromanol		1.47667e+07	1.27805e+07	1.24667e+07	1.50333e+07
393.167	13.8374	N-acetyldemethylphosphinothricyl-L-alanyl-L-leucine		75345.8	74599.9	70908.1	93654.8
396.251	4.31809	methyl 8-[3,5-epidioxy-2-(3-hydroperoxy-1-pentenyl)-cyclopentyl]-octanoate	Lipid Metabolism	522847	402975	570533	239780
398.137	16.5322	Adenosylmethionine	Amino Acid Metabolism	458189	712280	848234	2.38255e+06
399.212	9.818	Ala/Val/Asn/Pro	Peptide	219027	131582	214868	348294
399.335	4.7132	Palmitoylcarnitine	Lipid Metabolism	112505	442166	829874	936479
400.197	12.1861	Ala/Val/Asp/Pro	Peptide	92671.7	60547.3	100601	391771
402.169	4.44118	Sphenostylin D	Lipid Metabolism	88636.3	116095	131876	119540
402.19	8.05939	Thr/Trp/Pro	Peptide	127093	111999	225473	2.26708e+06
403.019	16.5917	CDP	Nucleotide Metabolism	60356.7	79441.7	69822.3	47861.2
403.199	4.37377	20-hydroxy-fusarin		7.24667e+08	7.11333e+08	7.56667e+08	7.48333e+08
403.199	4.93549	20-hydroxy-fusarin		535000000	469000000	560000000	562000000
403.199	6.23307	20-hydroxy-fusarin		1.85667e+08	2.40667e+08	3.36333e+08	341000000
403.199	5.3362	20-hydroxy-fusarin		4.10333e+08	4.15667e+08	3.87333e+08	459000000
404.003	16.0386	Uridine 5'-diphosphate	Nucleotide Metabolism	420841	509274	503906	291447
404.184	4.39096	Eupatocunin		1.03574e+06	1.02173e+06	1.08187e+06	1.06106e+06
404.19	16.1587	Ala/Leu/Asp/Ser	Peptide	183683	130450	189140	304914
404.203	5.03802	15beta-Hydroxy-7alpha-mercapto-pregn-4-ene-3,20-dione 7-acetate		134000000	1.21933e+08	1.38333e+08	1.39667e+08
404.203	6.1319	15beta-Hydroxy-7alpha-mercapto-pregn-4-ene-3,20-dione 7-acetate		5.43333e+07	60100000	83600000	9.09333e+07
404.203	5.7514	15beta-Hydroxy-7alpha-mercapto-pregn-4-ene-3,20-dione 7-acetate		6.87667e+07	1.03933e+08	9.24667e+07	8.48333e+07
408.147	15.4269	Thr/Trp/Cys	Peptide	152613	166226	156174	201384
408.223	26.5383	Pro/Arg/His	Peptide	190163	188072	160418	145616
411.131	13.8827	Met/Met/Met	Peptide	194710	232287	232861	225978
412.247	4.33626	2,4-diamino-6-ethyl-5,3'-(2-cyclohexylphenoxy)prop-1'-yloxypyrimidine		717210	667379	980682	365540
413.155	12.9021	Glu/Glu/His	Peptide	198699	159827	180812	87773.2
413.227	9.2308	Ala/Leu/Asn/Pro	Peptide	889173	528463	964934	917183
413.264	13.0652	Ala/Lys/Val/Pro	Peptide	271545	177051	300139	134748
416.042	15.5593	5-{[-3-(3,4-dihydroxyphenyl)prop-2-enoyl]oxy}-3-hydroxy-4-(sulfooxy)cyclohex-1-ene-1-carboxylic acid		227767	253336	196595	222441
416.12	14.7163	AMP-Mor		NA	NA	NA	358969
416.131	16.0489	2-Hydroxybenzaldehyde O-[xylosyl-(1->6)-glucoside]		190743	118584	138339	221974
416.191	9.9523	Asp/Val/Pro/Ser	Peptide	4094990	3.03773e+06	4.08548e+06	5.5808e+06
416.239	14.8898	Ala/Lys/Ala/Gln	Peptide	54634.2	NA	135373	NA
417.165	10.68	Phe/Asp/His	Peptide	62375.6	17568.9	85691.1	1390220
417.198	15.8658	Glu/Arg/Asn	Peptide	192067	112415	230380	194816
418.207	7.89328	Ala/Glu/Ile/Ser	Peptide	NA	NA	NA	78862.1
424.16	13.9319	Ala/Asp/Gly/Tyr	Peptide	19089.7	NA	42852.9	83754.4
426.087	16.7497	Asp/Cys/Cys/Ser	Peptide	124418	139959	77752.6	54481.4
426.186	13.8649	His/Pro/Ser/Ser	Peptide	NA	NA	NA	475571
426.248	13.2034	Ile/Thr/Pro/Pro	Peptide	NA	28868.5	NA	181357
427.028	14.0096	ADP	Energy Metabolism	1.11194e+06	1.16278e+06	1.10098e+06	1.50149e+06
427.029	14.7769	ADP	Energy Metabolism	1811841	3.23699e+06	2.0932e+06	1.74322e+06
427.253	13.8395	Arg/Val/Gly/Pro	Peptide	829003	473309	1.43538e+06	3.18222e+06
427.366	7.82536	Stearoylcarnitine		275543	636752	1.0983e+06	1.71279e+06
428.133	14.8821	6-[2-(carboxymethyl)-3,5-dihydroxy-4-(3-methylbut-2-en-1-yl)phenoxy]-3,4,5-trihydroxyoxane-2-carboxylic acid		195216	101077	61876.8	82154
429.223	14.7106	Asn/Leu/Pro/Ser	Peptide	494703	276149	439298	510418
430.066	15.0853	CMP-2-aminoethylphosphonate	Amino Acid Metabolism	259399	290051	296714	264448
432.212	12.429	ethyl-(4-aminophenyl)-1-deoxy-D-ribitol		NA	NA	NA	84527.7
433.181	14.0826	Ala/Thr/Asp/Gln	Peptide	64956.5	38973.4	88560.4	56127.7
433.237	5.162	notoamide E		1.51807e+06	1.53187e+06	774941	897110
437.706	11.3599	Ile/Trp/Trp/Trp/Trp	Peptide	71119.8	27882.6	90186.8	NA
438.175	10.7649	Ala/Ala/Asp/Tyr	Peptide	213218	236669	241124	245609
438.178	14.7166	Met/Thr/Thr/Ser	Peptide	NA	NA	NA	635032
439.118	14.4616	Asn/Thr/Cys/Cys	Peptide	73975.5	44409.5	73847.7	35904.5
439.243	10.9151	Asn/Leu/Pro/Pro	Peptide	475209	265579	717320	1.32708e+06
440.194	12.9846	Diferuloylputrescine		88653.9	51671.2	139233	1.04248e+06
441.178	15.1077	platensimycin		201048	173876	508145	948218
445.21	4.13144	icos#3		911783	924219	1.16684e+06	890328
445.218	11.37	Asn/Val/Val/Asp	Peptide	19799	9940.15	33660.3	46638.7
446.061	16.1079	CDP-Ethanolamine	Lipid Metabolism	1.82271e+06	1.37378e+06	1.68932e+06	1.41125e+06
448.173	4.32993	Dichotosin	Lipid Metabolism	701449	904286	958620	647382
458.205	10.4549	2-Hydroxy-desipramine glucuronide		199167	149233	265173	1.17222e+06
459.244	13.5498	Arg/Leu/Asp/Gly	Peptide	377715	238007	443220	NA
460.191	15.3909	Ala/Asp/Gln/Gln	Peptide	167289	98442.3	146794	118906
460.264	14.2005	Ala/Lys/Lys/Asp	Peptide	614483	349817	1.09407e+06	2.01464e+06
461.212	13.1057	Asn/Glu/Ile/Ser	Peptide	NA	NA	NA	737214
462.197	14.8161	Cys/Leu/Met/Pro	Peptide	NA	NA	NA	1.72366e+06
462.212	10.7004	Glu/Phe/Ala/Pro	Peptide	234831	194160	284873	825240
463.074	17.7922	Adenylsuccinic acid	Nucleotide Metabolism	106864	200999	99718.1	46281.4
464.176	15.1493	Glu/Glu/Ser/Thr	Peptide	NA	NA	6814.2	133503
465.322	4.62095	LysoPE(18:1)	Lipid Metabolism	149971	130417	154903	154808
466.218	11.3806	Glu/Arg/Tyr	Peptide	73317.9	40869.5	61221.3	95424.9
466.312	3.70804	Cholesterol sulfate	Lipid Metabolism	850515	963070	820696	1.00346e+06
470.347	6.99839	Ile/Ile/Ile/Ile	Peptide	204502	187400	240999	261718
471.234	12.7167	Asn/Glu/Ile/Pro	Peptide	68575.2	28536.9	59415.2	345553
472.113	14.211	CMP-N-trimethyl-2-aminoethylphosphonate	Lipid Metabolism	992255	1.0137e+06	954283	1.07698e+06
473.176	15.8885	Asp/Asp/Gln/Pro	Peptide	124622	73254.5	88089.9	41248.5
473.249	15.1571	Asn/Glu/Ile/Val	Peptide	NA	NA	NA	1512796
474.196	15.0105	Glu/Glu/Pro/Thr	Peptide	NA	NA	NA	726946
475.193	15.4621	Ala/Glu/Gln/Glu	Peptide	83616.9	29028.4	164706	634001
475.243	7.87182	Ala/Leu/Trp/Ser	Peptide	4.47871e+06	3.43177e+06	6.80002e+06	8.54585e+06
476.263	13.8375	Pro/Val/Val/Tyr	Peptide	92607.6	93952.6	114202	120932
480.188	10.5732	Glu/Met/Thr/Thr	Peptide	83014.9	NA	93655	389242
482.169	9.90825	Ala/Met/Met/Met	Peptide	100584	96150.8	48786.8	68810.5
483.237	9.35628	Caffeoylferuloylspermidine		239986	158381	342447	2.49324e+06
484.192	15.1389	Ala/Glu/Glu/His	Peptide	1.19639e+07	8.74787e+06	11002648	22700000
484.196	13.068	Asp/Phe/Phe/Gly	Peptide	NA	NA	2919.98	105883
484.281	3.96148	1-hexadecanoyl-sn-glycero-3-phospho-(1'-sn-glycerol)	Lipid Metabolism	2.0083e+06	878442	1.47191e+06	673174
485.124	14.4097	Cys/Cys/Ser/Ser/Ser	Peptide	120793	151132	109043	61473
486.159	15.1655	agarotriose		NA	NA	28615.6	102707
486.195	13.2226	Ala/Phe/Phe/Cys	Peptide	NA	NA	NA	444078
487.275	14.1946	Arg/Val/Val/Asp	Peptide	64871.5	29889.8	134890	75489.3
488.108	15.1529	Citicoline	Lipid Metabolism	2.03962e+06	1.73447e+06	1.8563e+06	2.04496e+06
488.26	13.5787	Asn/Leu/Lys/Asp	Peptide	134967	130630	177097	266328
491.187	15.1287	Asn/Met/Met/Pro	Peptide	26295.8	21074.6	179801	827415
495.198	12.4454	Ala/Asp/Gln/Tyr	Peptide	70073.5	33268	85587.5	60863.5
495.333	7.86433	LysoPC(16:0)	Lipid Metabolism	4.67681e+06	4.0238e+06	2.16731e+06	2.07965e+06
495.333	4.78281	PE(19:0)	Lipid Metabolism	5.13175e+06	5.11211e+06	2.32853e+06	1.93769e+06
496.193	13.9746	Asn/Asn/Ser/Tyr	Peptide	236990	136012	209946	554593
497.224	11.4976	Asn/Leu/Asp/His	Peptide	78152.1	39110.8	130008	204988
498.18	10.3842	Ala/Met/Asp/Tyr	Peptide	1.33084e+06	1736289	1.26849e+06	1.59102e+06
498.18	9.6385	Asp/Met/Phe/Ser	Peptide	615854	989896	563400	1.18267e+06
502.291	27.9074	Ala/Lys/Trp/Val	Peptide	207743	203060	228460	222490
504.254	15.201	Asp/Lys/Lys/Asp	Peptide	NA	NA	NA	731957
505.217	12.0345	Asp/Phe/Gln/Pro	Peptide	266981	244017	285921	934170
506.996	15.9395	Adenosine triphosphate	Energy Metabolism	176825	682244	306456	420002
507.255	13.835	Lys/Met/Met/Val	Peptide	NA	NA	NA	320082
509.249	12.4189	Asn/Leu/Thr/Tyr	Peptide	252664	131926	393933	330082
510.194	14.7729	Ala/Cys/Cys/Lys/Ser	Peptide	NA	NA	NA	458995
510.296	3.93371	a 2-acyl-sn-glycero-3-phosphoglycerol (n-C18:1)		726433	425685	616140	314692
512.312	3.91926	1-Stearoylglycerophosphoglycerol	Lipid Metabolism	1.7534e+06	786762	1.39034e+06	533569
514.218	11.1166	Asp/Phe/Pro/His	Peptide	181957	99363.6	236068	677824
514.406	6.23279	Didodecyl thiobispropanoate		8804807	7.32521e+06	9.33457e+06	8990779
514.406	5.35226	Didodecyl thiobispropanoate		1.2245e+07	1.05803e+07	1.46333e+07	1.25667e+07
516.291	12.6618	Glu/Ile/Gln/Lys	Peptide	82125.7	17012.5	156127	308757
520.22	9.80796	Glu/Glu/Ile/Met	Peptide	38478.7	21505.6	88103.5	365558
523.364	7.86182	LysoPC(18:0)	Lipid Metabolism	6.06495e+06	6.03959e+06	3.18479e+06	3.26208e+06
523.365	4.71008	2-acetyl-1-alkyl-sn-glycero-3-phosphocholine	Lipid Metabolism	4.89475e+06	4.97771e+06	2.44717e+06	2.34381e+06
527.117	13.8922	Ala/Cys/Cys/Cys/Glu	Peptide	77285	81604.2	92657.6	93888.2
529.274	7.84564	Ala/Glu/Ile/Pro/Thr	Peptide	3.83956e+06	2.49826e+06	3.69877e+06	2.40423e+06
529.275	4.85343	Ala/Glu/Ile/Pro/Thr	Peptide	3.80864e+06	2.60993e+06	4.2179e+06	3.00957e+06
530.248	8.01578	Gln/Thr/Trp/Pro	Peptide	386369	185039	559611	829101
530.318	12.0469	Arg/Leu/Lys/Asp	Peptide	186957	127859	254290	156573
530.47	3.91423	Epoxymurin A		363553	504016	486364	493299
532.221	10.4557	Ponatinib		201298	122867	314928	630185
533.217	10.5211	Ala/Asp/Met/Pro/Thr	Peptide	292507	215748	352773	344701
534.261	28.1697	Ala/Lys/Met/Trp	Peptide	95285.5	100966	101475	100882
537.513	4.2765	N-(eicosanoyl)-tetradecasphing-4-enine	Lipid Metabolism_Sphingolipids [SP]	223638	152912	195189	251783
537.513	3.89338	N-(eicosanoyl)-tetradecasphing-4-enine	Lipid Metabolism_Sphingolipids [SP]	723380	699250	697228	910777
541.06	14.014	Cyclic ADP-ribose		1.67265e+06	1.68697e+06	1.5557e+06	2.22118e+06
541.214	15.7192	Glu/Glu/Gln/His	Peptide	143135	98366.7	165169	120653
542.27	10.4643	Asp/Lys/Pro/Pro/Ser	Peptide	36476.8	8275.72	30498.7	NA
545.276	4.23404	1-(eicosatetraenoyl)-sn-glycero-3-phosphoserine	Lipid Metabolism	103761	64450.1	58122.9	157081
547.232	9.97915	Ala/Glu/Met/Pro/Thr	Peptide	65641.2	41571	75407.6	442965
550.312	15.5921	Ile/Lys/Gln/Tyr	Peptide	580161	461809	719911	362396
551.124	13.7468	6-(-D-glucosaminyl)-1-phosphatidyl-myo-inositol		257054	265227	159962	133497
551.191	14.1027	Ala/Cys/Met/Met/Pro	Peptide	NA	NA	NA	632132
551.307	16.9738	Arg/Leu/Thr/Tyr	Peptide	524612	402313	561118	627348
552.258	13.9044	Cys/Lys/Thr/Thr/Thr	Peptide	292789	116963	477547	463064
552.293	28.5864	Bipindogulomethyloside		208192	221670	235824	233016
555.229	12.1943	Asp/His/Pro/Ser/Thr	Peptide	207766	110925	219834	98876.9
556.232	9.74483	Cys/Gly/Lys/Ser/Tyr	Peptide	97831.9	73391.1	133949	441509
565.07	15.7327	CDP-glucose	Carbohydrate Metabolism	NA	326962	NA	427609
565.071	15.7645	UDP-L-Ara4FN	Carbohydrate Metabolism	NA	247661	NA	350277
566.056	15.9245	Uridine diphosphate glucose	Carbohydrate Metabolism	1.61221e+06	1.33792e+06	1.45132e+06	1.68949e+06
568.143	14.7811	5,7,3',5'-Tetrahydroxy-3,6,8,4'-tetramethoxyflavone 3'-glucoside	Lipid Metabolism	32232.5	16102.4	62001.1	332437
570.173	28.413	Apiumoside		149987	172106	116262	89070.7
570.273	2.66057	Pipercyclobutanamide A		147909	126257	164646	171775
572.244	14.3891	Ala/Glu/Glu/Pro/Gln	Peptide	179612	108037	135067	NA
573.088	12.3592	GDP-3,6-dideoxy-D-galactose		294102	250747	234741	282801
573.173	14.2152	Cys/Asp/Ser/Ser/Tyr	Peptide	NA	NA	3043.05	99825.9
574.495	3.6736	Montecristin		1.74145e+06	1.33701e+06	1.63094e+06	1.81583e+06
576.511	3.67971	Cohibin C		3.79364e+06	3.01357e+06	3.84808e+06	4.58901e+06
578.138	15.1196	Cys/Cys/Cys/His/Asn	Peptide	76927.2	54890.2	164665	339710
580.334	11.4728	Ala/His/Ile/Ile/Gln	Peptide	147261	107418	144291	318056
584.237	16.4698	Cys/His/Pro/Gln/Thr	Peptide	NA	NA	NA	438636
584.391	15.2525	Ile/Ile/Ile/Ile/Asn	Peptide	287233	337628	203947	50497.7
585.278	7.86925	Gly/His/His/His/Val	Peptide	1.42667e+07	1.7599e+07	2.16333e+07	1.76729e+07
585.375	14.6483	Asp/Ile/Ile/Ile/Ile	Peptide	1.44297e+06	1.00324e+06	1.41609e+06	864589
590.234	7.89721	Glu/Glu/Gln/Trp	Peptide	1.6754e+07	2.20333e+07	16700000	1.6078e+07
591.238	7.2653	Asp/Asp/Glu/Ile/Thr	Peptide	2.05515e+06	2.75232e+06	2.88922e+06	2.23237e+06
592.237	13.7097	Cys/Asn/Asn/Arg/Ser	Peptide	119726	80760.5	140850	118506
598.404	14.9721	Ile/Ile/Ile/Ile/Gln	Peptide	168742	302128	170957	40103.3
599.391	14.3824	Glu/Ile/Ile/Ile/Ile	Peptide	1.28138e+06	1.39404e+06	1.29213e+06	936750
601.151	13.3645	Cys/Cys/Asp/Asp/Phe	Peptide	36842.4	29670.9	19296.4	394833
602.526	3.68314	1-(hexadecanoyl)-2-(8-[3]-ladderane-octanyl)-sn-glycerol	Lipid Metabolism	2.41527e+06	2.10301e+06	2.43834e+06	2.59755e+06
605.077	17.739	Guanosine diphosphate mannose	Carbohydrate Metabolism	194173	246754	166018	138261
607.082	14.7149	Uridine diphosphate-N-acetylglucosamine	Carbohydrate Metabolism	804757	7986560	741023	9537982
612.152	17.0789	Oxidized glutathione	Amino Acid Metabolism	1.70184e+06	3.08047e+06	1.62776e+06	980716
612.264	3.89904	5beta-cholestan-3alpha,4alpha,11beta,12beta,21-pentol-3,21-disulphate	Lipid Metabolism	6.03569e+06	4.9008e+06	6.38521e+06	6638641
612.342	4.70526	Cys/His/Ile/Ile/Lys	Peptide	3.23639e+06	3.16182e+06	3.30821e+06	3.00872e+06
614.172	8.55193	7,8-H2pterin-6-ylmethyl-l-(4-aminophenyl)-1-deoxy-5-[1- -D- ribofuranosyl 5-phosphate]-D-ribitol		297643	277225	259337	324251
614.396	9.21832	CHAPS		16000000	14400000	1.64667e+07	16100000
614.398	9.21752	Gly/Lys/Arg/Arg/Val	Peptide	3.15597e+06	2.85745e+06	3.16465e+06	3.02677e+06
615.169	28.3441	FeHM		868671	1.15823e+06	1.03334e+06	909665
615.169	13.6216	FeHM		7.5863e+06	8.60332e+06	7367879	6.15587e+06
618.364	14.3712	Gly/Lys/Lys/Met/Arg	Peptide	122983	118808	138693	128340
621.028	16.438	ADP-ribose 1"-2" cyclic phosphate		198287	194326	120458	129568
638.439	11.2982	mogroside IE		48547	22757.9	59589.8	201000
640.296	3.88548	Asp/Phe/Phe/Gly/Arg	Peptide	7.7032e+06	6.58158e+06	1.12531e+07	11300000
647.622	3.90498	Cer(d18:1/24:1)	Lipid Metabolism	1.47648e+06	1.60424e+06	1.69021e+06	1.65787e+06
647.623	4.29095	Cer(d18:1/24:1)	Lipid Metabolism	294422	342877	385844	469918
649.637	4.33501	N-Lignoceroylsphingosine	Lipid Metabolism	167517	115630	237360	237512
651.148	12.491	Hemin		817178	828734	764744	608738
653.324	3.89307	Asp/His/Ile/Asn/Arg	Peptide	588854	608289	637011	778980
654.29	10.0204	Asp/His/Met/Pro/Arg	Peptide	369304	400651	320199	979467
662.447	3.86671	Phe/Ile/Lys/Lys/Lys	Peptide	2.9565e+06	3.68269e+06	3.15124e+06	2.6429e+06
663.109	14.013	Fenugreekine		3.09333e+07	2.92333e+07	27700000	3.98667e+07
668.173	12.5756	3,4,2',3',4'-Pentahydroxy-4-methoxychalcone 4-methyl ether 4'-O-(2''-O-caffeoyl-6''-O-acetylglucoside)	Lipid Metabolism	1.51473e+06	1.69312e+06	1.4986e+06	1094153
668.328	3.86001	Asp/His/Ile/Val/Trp	Peptide	6.19515e+06	6.41031e+06	1.24333e+07	1.13667e+07
669.437	7.88356	PE(31:4)	Lipid Metabolism	242935	236622	378057	382359
671.279	14.8406	Asp/Asp/Phe/Ile/Tyr	Peptide	NA	NA	NA	329847
672.444	10.9206	Vinaginsenoside R12		15728.7	7797.97	27690.6	106070
672.475	3.77602	PA(14:1/20:1)	Lipid Metabolism	479617	570775	510085	505297
674.099	14.0528	cyclic GMP-AMP		722324	612102	648974	981318
674.536	7.82807	SM(d18:1/14:0)	Lipid Metabolism	2.87741e+06	3.7411e+06	2.99917e+06	3.01249e+06
676.131	13.5022	{6-[5,7-dihydroxy-2-(4-hydroxyphenyl)-4-oxo-8-[3,4,5-trihydroxy-6-(hydroxymethyl)oxan-2-yl]-3,4-dihydro-2H-1-benzopyran-6-yl]-4,5-dihydroxy-2-(hydroxymethyl)oxan-3-yl}oxidanesulfonic acid		74595.4	79645.1	89807.2	66326.9
678.447	11.721	PG(29:1)	Lipid Metabolism	12222.1	NA	15298.9	13561.8
682.429	15.0972	Cyclopassifloside II		396845	297659	943201	1.38761e+06
685.272	3.9446	Cys/Cys/Phe/Lys/Trp	Peptide	702502	493547	1.16853e+06	900252
688.552	7.8162	N-(docosanoyl)-tetradecasphing-4-enine-1-phosphoethanolamine	Sphingolipids [SP]	2.33432e+06	2.30518e+06	1.90613e+06	1.85889e+06
689.499	6.8558	PE(18:1/14:0)	Lipid Metabolism	389836	265097	420337	299216
689.499	3.9349	PC(14:1/15:0)	Lipid Metabolism	880901	780790	783912	629017
691.515	3.77426	PC(17:0/12:0)	Lipid Metabolism_Glycerophospholipids [GP]	1.03017e+06	1.07956e+06	1.06346e+06	1.08391e+06
691.515	6.99799	PE(14:0/18:0)	Lipid Metabolism_Glycerophospholipids [GP]	564095	332587	548433	405756
691.517	4.31291	PC(17:0/12:0)	Lipid Metabolism_Glycerophospholipids [GP]	256216	142656	222618	176100
693.262	14.8587	Glu/Phe/His/Met/Met	Peptide	NA	NA	NA	89882.3
693.44	10.2811	His/Ile/Ile/Arg/Arg	Peptide	125451	125323	129764	138196
696.358	3.86514	Asp/Phe/Phe/Ile/Arg	Peptide	3.74813e+06	4.18827e+06	8.84113e+06	8.37478e+06
698.49	3.75151	PA(14:1/22:2)	Lipid Metabolism	179854	218150	238305	251106
700.506	3.74293	PA(16:1/20:1)	Lipid Metabolism	358870	421386	395741	410839
700.551	7.8187	N-(tricosanoyl)-tetradecasphingadienine-1-phosphoethanolamine	Sphingolipids [SP]	2.82301e+06	3.07925e+06	2.79294e+06	2.62963e+06
702.568	7.80691	N-(tricosanoyl)-tetradecasphing-4-enine-1-phosphoethanolamine	Sphingolipids [SP]	34300000	3.83333e+07	3.37333e+07	3.49333e+07
702.568	4.36392	N-(tricosanoyl)-tetradecasphing-4-enine-1-phosphoethanolamine	Sphingolipids [SP]	1.10401e+07	1.27667e+07	11900000	12300000
705.531	4.14675	PC(14:0/16:0)	Lipid Metabolism_Glycerophospholipids [GP]	5.06681e+06	2.94471e+06	4.41823e+06	3.08707e+06
713.303	3.94793	Cys/Phe/Lys/Met/Trp	Peptide	845195	629701	1.71016e+06	1.71781e+06
713.5	4.03739	PE(14:0/20:3)	Lipid Metabolism	1.56881e+06	1.24579e+06	1.44186e+06	1.32246e+06
714.281	15.1353	Asp/Met/Met/Arg/Tyr	Peptide	NA	NA	NA	416344
715.514	4.06147	PE(16:0(9Cp)/16:0(9Cp))	Lipid Metabolism	7.63728e+06	6.07562e+06	7.69547e+06	6.64345e+06
716.583	7.78741	N-(tetracosanoyl)-tetradecasphing-4-enine-1-phosphoethanolamine	Sphingolipids [SP]	1.07147e+06	1.10995e+06	1.10594e+06	1.03444e+06
717.53	4.09345	PE(14:0/20:1)	Lipid Metabolism_Glycerophospholipids [GP]	9.23106e+06	7.56888e+06	8.95764e+06	8.74705e+06
717.533	6.69739	PC(13:0/18:1)	Lipid Metabolism_Glycerophospholipids [GP]	2.00573e+06	1.5733e+06	2.25975e+06	1.92457e+06
719.312	11.7229	Glu/Glu/Glu/Lys/Trp	Peptide	177566	109832	168215	77555.5
719.315	11.7179	Asp/Phe/Ile/Tyr/Tyr	Peptide	72818.8	50632.4	65151	29161
724.39	3.85755	Lys/Lys/Thr/Trp/Tyr	Peptide	1.77218e+06	1.74565e+06	4061192	3.83266e+06
728.584	7.80506	SM(d18:2/18:0)	Lipid Metabolism	1.79306e+06	1.95526e+06	1.94953e+06	2.10214e+06
730.599	7.80352	SM(d18:1/18:0)	Lipid Metabolism	3.84862e+06	4.27572e+06	4.61265e+06	5.53127e+06
731.408	3.88385	Asp/Lys/Lys/Arg/Trp	Peptide	2.49681e+06	2.40915e+06	3.05005e+06	2.60128e+06
731.546	4.12726	PC(12:0/20:1)	Lipid Metabolism_Glycerophospholipids [GP]	1.12813e+07	7.92229e+06	9526330	8618233
732.613	7.78601	SM(d16:0/20:0)	Lipid Metabolism	883294	1.16589e+06	1.43602e+06	2.99653e+06
733.562	4.81978	PC(16:0/16:0)	Lipid Metabolism_Glycerophospholipids [GP]	1.50918e+07	1.17858e+07	1.69667e+07	14800000
733.562	5.73922	PE(15:0/20:0)	Lipid Metabolism_Glycerophospholipids [GP]	1.54667e+07	1.14481e+07	16500000	14600000
733.563	4.13525	PE(15:0/20:0)	Lipid Metabolism_Glycerophospholipids [GP]	43700000	3.13667e+07	4.16333e+07	4.06667e+07
736.279	10.3728	Cys/Gly/Trp/Trp/Trp	Peptide	3.73794e+06	6.9439e+06	2.70356e+06	7.11094e+06
737.5	4.00899	PE(14:0/22:5)	Lipid Metabolism	2.3248e+06	1.68336e+06	2.37124e+06	2.60406e+06
739.516	5.56336	PE(16:1/20:3)	Lipid Metabolism	615748	575166	686134	769554
739.517	4.02125	PC(15:0/18:4)	Lipid Metabolism	2.02956e+06	1.77334e+06	2.02391e+06	2.31097e+06
741.334	3.96073	Phe/Lys/Met/Met/Trp	Peptide	701211	587108	1708592	1.64951e+06
743.076	16.4381	NADP	Energy Metabolism	1.40894e+06	1.55776e+06	1.05417e+06	880932
746.512	3.64625	PG(16:0/18:2)	Lipid Metabolism	2.67731e+06	2.03232e+06	2.8468e+06	3.13125e+06
748.527	3.65401	PG(16:0/18:1)	Lipid Metabolism_Glycerophospholipids [GP]	5.53436e+06	4.04095e+06	5850831	7078677
749.535	3.96075	PE(20:4/P-18:1)	Lipid Metabolism	1.38723e+06	1.87148e+06	1.40532e+06	1.67452e+06
751.553	3.93443	PE(O-18:1/20:4)	Lipid Metabolism	2.10557e+06	3.0019e+06	2.08584e+06	2.22881e+06
752.421	6.92046	His/Arg/Arg/Val/Trp	Peptide	221561	198671	382596	297191
752.421	3.8713	His/Arg/Arg/Val/Trp	Peptide	589697	502034	1.29153e+06	1.20985e+06
756.614	7.77549	SM(d18:1/20:1)	Lipid Metabolism	578761	712187	730130	846245
757.562	5.10955	PE(15:0/22:2)	Lipid Metabolism	16100000	1.49032e+07	15400000	1.69333e+07
757.562	4.10654	PC(14:0/20:2)	Lipid Metabolism_Glycerophospholipids [GP]	6.57333e+07	6.36333e+07	6.14667e+07	71300000
758.629	7.79058	SM(d16:1/22:0)	Lipid Metabolism	1.24719e+06	1.20148e+06	1.51481e+06	1752152
759.505	3.79226	PS(16:0/18:2)	Lipid Metabolism	2.30336e+06	1.56792e+06	2.2896e+06	1.78806e+06
759.577	4.11631	PE(37:1)	Lipid Metabolism	1.58667e+08	1.38533e+08	1.44333e+08	1.73333e+08
759.577	5.13387	PC(14:0/20:1)	Lipid Metabolism_Glycerophospholipids [GP]	5.12667e+07	47300000	49700000	5.45667e+07
759.577	5.60351	PE(15:0/22:1)	Lipid Metabolism	4.99667e+07	4.69333e+07	4.90667e+07	5.47667e+07
760.432	12.0434	His/His/Arg/Arg/Arg	Peptide	242962	260305	236772	215363
761.519	7.28056	PS(16:0/18:1)	Lipid Metabolism	643933	397961	949577	728333
761.521	3.77784	PS(16:0/18:1)	Lipid Metabolism	6.93666e+06	5.08811e+06	6.65946e+06	5.75504e+06
763.514	4.31301	PC(35:6)	Lipid Metabolism	367277	374284	435524	416800
763.517	3.94987	PC(35:6)	Lipid Metabolism	2.74801e+06	2.44909e+06	2.71094e+06	2787747
763.536	3.67619	PS(16:0/18:0)	Lipid Metabolism	6.48727e+06	4.84161e+06	6583427	7.26162e+06
764.571	7.81415	PA(P-42:4)	Lipid Metabolism	3.46101e+06	3.85436e+06	3.4248e+06	3.59369e+06
765.532	3.98456	PC(15:0/20:5)	Lipid Metabolism	1.28543e+06	1.19378e+06	1.19546e+06	1.46547e+06
767.547	4.03993	PE(16:0/22:4)	Lipid Metabolism_Glycerophospholipids [GP]	946347	994044	1.00896e+06	965004
769.366	4.0012	His/Lys/Asn/Trp/Trp	Peptide	438287	357100	1.0794e+06	1.03753e+06
773.594	4.09347	PE(16:0/22:1)	Lipid Metabolism	3.9466e+06	3.2938e+06	3.40297e+06	3.88162e+06
774.543	3.64113	PG(18:0/18:2)	Lipid Metabolism	4.03637e+06	3.2145e+06	4.46683e+06	4.50716e+06
776.557	3.64715	PG(18:0/18:1)	Lipid Metabolism	2.24979e+06	1.77977e+06	2.53836e+06	2.5862e+06
777.567	3.96082	PE(P-40:5)	Lipid Metabolism	326538	399257	372428	415206
778.464	28.6506	PI(12:0/18:2)	Lipid Metabolism	201679	243151	269753	303477
781.562	4.08802	PC(14:0/22:4)	Lipid Metabolism_Glycerophospholipids [GP]	1.98667e+07	1.90667e+07	1.79667e+07	2.41667e+07
783.505	7.20337	PS(16:0/20:4)	Lipid Metabolism	223626	182282	302215	282993
783.505	3.76339	PS(16:0/20:4)	Lipid Metabolism	2.41578e+06	2.03805e+06	2.38633e+06	2.64797e+06
784.646	7.77588	SM(d18:2/22:0)	Lipid Metabolism	2.75539e+06	2.43616e+06	3.1173e+06	3.72419e+06
785.523	3.78462	PS(16:0/20:3)	Lipid Metabolism	2936985	2.42375e+06	2.89909e+06	3.05357e+06
785.593	5.06226	PE(39:2)	Lipid Metabolism	9601269	9.84482e+06	9.89439e+06	9.75819e+06
785.593	4.08695	PC(18:1/18:1)	Lipid Metabolism_Glycerophospholipids [GP]	2.95333e+07	30200000	2.80333e+07	3.03667e+07
785.593	5.72055	PC(18:1/18:1)	Lipid Metabolism_Glycerophospholipids [GP]	9.45619e+06	9.16794e+06	9.49701e+06	1.00212e+07
786.662	7.77822	SM(d16:1/24:0)	Lipid Metabolism	5.6907e+06	5.30901e+06	7.80089e+06	8.68297e+06
787.537	3.75319	PS(18:0/18:2)	Lipid Metabolism	12300000	10427245	1.21333e+07	1.24667e+07
787.608	5.0425	PE(39:1)	Lipid Metabolism	1.27227e+07	12423714	1.30333e+07	14100000
787.608	4.10466	PC(14:0/22:1)	Lipid Metabolism_Glycerophospholipids [GP]	27300000	27200000	2.66333e+07	31100000
789.373	4.33749	Gly/Arg/Trp/Trp/Trp	Peptide	3.31667e+08	313000000	3.45667e+08	347000000
789.373	6.05443	Gly/Arg/Trp/Trp/Trp	Peptide	1.70333e+07	14986908	30300000	2.85667e+07
789.55	7.20988	PS(18:0/18:1)	Lipid Metabolism	1.15268e+06	820030	1.6405e+06	1.56284e+06
789.554	3.78813	PS(18:0/18:1)	Lipid Metabolism	1.12803e+07	8.9775e+06	11300000	1.16333e+07
791.567	3.67189	PS(18:0/18:0)	Lipid Metabolism	9.47661e+06	8.42343e+06	10317596	10800000
792.331	15.5654	Phe/Phe/Met/Trp/Tyr	Peptide	396099	450599	282561	105958
794.509	3.57851	PG(16:0/22:6)	Lipid Metabolism	266523	220696	263761	252517
796.243	12.9588	Acacetin 7-O-[6''-O-glucosyl-2''-O-(3'''-acetylrhamnosyl)glucoside	Lipid Metabolism	140927	139368	191541	172820
796.527	3.64026	PG(16:0/22:5)	Lipid Metabolism	942308	789289	901269	1.14755e+06
798.542	3.64027	PG(16:0/22:4)	Lipid Metabolism	750835	620484	752000	910722
798.662	7.76902	SM(d18:2/23:0)	Lipid Metabolism	1.01629e+06	903728	1.20853e+06	1.33954e+06
799.402	13.4979	Ile/Arg/Trp/Tyr/Tyr	Peptide	264342	169869	198177	91446.8
800.445	28.9363	PI(32:5)	Lipid Metabolism	106556	129737	106958	102279
800.555	3.6463	PG(18:0/20:3)	Lipid Metabolism	223725	192110	258988	296782
800.677	7.76717	SM(d18:1/23:0)	Lipid Metabolism	1.29959e+06	1.1743e+06	1.71536e+06	1.97516e+06
805.563	4.02112	PC(16:0/22:6)	Lipid Metabolism_Glycerophospholipids [GP]	8.49508e+06	8.68848e+06	7901557	9752192
807.507	3.76586	PS(20:3/18:3)	Lipid Metabolism	949902	864393	1.00189e+06	1087695
807.578	4.04951	PC(16:0/22:5)	Lipid Metabolism_Glycerophospholipids [GP]	10686904	9.91023e+06	1.00044e+07	1.31667e+07
809.523	3.75406	PS(18:1/20:4)	Lipid Metabolism	3.47913e+06	3.25468e+06	3.71029e+06	4.39194e+06
809.593	4.02296	PC(16:0/22:4)	Lipid Metabolism_Glycerophospholipids [GP]	8.68646e+06	8.84015e+06	8.33899e+06	1.01051e+07
810.561	15.2424	PI(O-33:0)	Lipid Metabolism	82078	98833	72098.9	9586.3
810.662	7.75598	SM(d42:3)	Lipid Metabolism	3.91426e+06	3.28407e+06	4.89383e+06	5.71596e+06
811.537	6.96983	PS(18:0/20:4)	Lipid Metabolism	912746	861242	1.2597e+06	1.19643e+06
811.539	3.74506	PS(18:0/20:4)	Lipid Metabolism	1.51333e+07	1.54667e+07	15300000	1.82333e+07
812.678	7.76458	SM(d18:2/24:0)	Lipid Metabolism	1.84333e+07	1.61333e+07	2.23667e+07	2.65333e+07
814.692	7.75871	SM(d18:1/24:0)	Lipid Metabolism	1.19478e+07	1.03629e+07	1.72333e+07	1.80667e+07
815.567	3.66943	PS(16:0/22:2)	Lipid Metabolism	1.98558e+06	1.818e+06	2017094	2.34834e+06
817.581	3.66421	PS(16:1/22:0)	Lipid Metabolism	569829	539645	624328	693541
819.565	4.14457	DGCC(20:5/20:5)		2.48932e+06	2.71718e+06	2.65347e+06	2.77988e+06
822.543	3.63508	PG(18:0/22:6)	Lipid Metabolism	227592	200257	229561	263563
824.557	3.64538	PG(18:0/22:5)	Lipid Metabolism	210038	157686	173050	265193
824.594	4.16888	Fucoxanthinol 3-myristoleate		241507	225916	281782	299170
826.693	7.74554	SM(d18:2/25:0)	Lipid Metabolism	366667	321462	498060	488442
828.71	7.69188	N-(pentacosanoyl)-sphing-4-enine-1-phosphocholine	Lipid Metabolism	312882	310775	483397	475436
833.594	4.01835	PC(18:0/22:6)	Lipid Metabolism_Glycerophospholipids [GP]	3.17495e+06	3350994	3.04364e+06	3.47152e+06
835.607	3.99883	PC(18:0/22:5)	Lipid Metabolism_Glycerophospholipids [GP]	2.16592e+06	2.31466e+06	2.23595e+06	2.62344e+06
836.54	7.0081	PI(16:0/18:1)	Lipid Metabolism	155922	126427	248776	252269
837.55	3.72604	PC(MonoMe(11,3)/MonoMe(11,3))		4.31171e+06	4.8773e+06	4.40237e+06	5.12928e+06
837.551	7.01153	PC(MonoMe(11,3)/MonoMe(11,3))		127426	130429	204059	208259
837.553	3.75576	PS(18:0/22:5)	Lipid Metabolism	4.02774e+06	4.07184e+06	4.21282e+06	4.905e+06
839.569	3.74718	PS(18:0/22:4)	Lipid Metabolism	1.60994e+06	1.73149e+06	1.65232e+06	2.03392e+06
840.708	7.72714	SM(d18:1/26:1)	Lipid Metabolism	685681	666599	936734	1.04514e+06
842.723	7.73775	SM(d18:1/26:0)	Lipid Metabolism	488312	401909	652667	679003
848.666	7.77284	2-Decaprenyl-3-methyl-6-methoxy-1,4-benzoquinone	Lipid Metabolism_Metabolism of Cofactors and Vitamins	495988	464332	627946	639596
884.546	3.77774	dihydrogeranylgeranyl bacteriopheophytin		316844	337921	331597	451378
886.561	3.77108	tetrahydrogeranylgeranyl bacteriopheophytin		931727	1.15214e+06	1.08177e+06	1.43e+06
1027.78	3.68055	PS(52:0)	Lipid Metabolism	801936	660794	885736	644210

## Sheet: Exp3
				Average relative intensity
Mass	RT	Putative metabolite	Map	3D7 WT	3D7+MIPS2571
84.0212	13.7088	4-Hydroxy-2-butynal		69696.6	52329.9
84.0213	11.0292	3-Butynoate	Carbohydrate Metabolism	127213	107558
87.0321	14.8196	2-Aminoacrylic acid	Amino Acid Metabolism	474046	401380
87.0685	10.3359	4-Aminobutyraldehyde	Amino Acid Metabolism	367145	278501
88.0159	11.5341	Malonic semialdehyde	Carbohydrate Metabolism	299536	247912
88.0159	12.3762	3-Hydroxypropenoate		166841	111735
88.016	14.6626	Malonic semialdehyde	Carbohydrate Metabolism	150285	62083.2
88.016	7.8078	Pyruvic acid	Carbohydrate Metabolism	80571.7	63887.5
89.0478	14.6946	Alanine	Amino Acid Metabolism	7.36401e+06	7.27656e+06
90.0316	9.12371	Lactic acid	Carbohydrate Metabolism	4.55628e+06	3.76859e+06
96.9929	27.8486	Phosphoramidate		436287	429961
96.9929	29.4638	Phosphoramidate		2.41807e+06	2.37088e+06
97.977	12.5608	Hydrogen phosphate	Energy Metabolism	1.68667e+07	14925000
98.0368	13.9291	2,4-pentadienoic acid	Lipid Metabolism	120038	140897
98.0846	10.3589	xi-4,5-Dihydro-2,4(5)-dimethyl-1H-imidazole		746160	531843
100.089	4.30538	Hexanal	Lipid Metabolism	152514	173994
102.032	13.3322	Acetoacetic acid	Lipid Metabolism	300651	333593
103.063	13.9394	Dimethylglycine	Amino Acid Metabolism	613828	573665
103.063	15.2698	gamma-Aminobutyric acid	Amino Acid Metabolism	1.18988e+06	1.29795e+06
103.1	20.2122	Choline	Amino Acid Metabolism	6.36921e+06	8.59165e+06
104.011	7.83285	Hydroxypyruvic acid	Amino Acid Metabolism	92483.9	23358.5
105.043	15.6544	Serine	Lipid Metabolism_Amino Acid Metabolism	1.05393e+07	11700000
105.079	14.7236	Diethanolamine	Lipid Metabolism	522124	532017
106.027	11.4292	Glyceric acid	Carbohydrate Metabolism	89361	73153.8
110.048	12.2121	Imidazole-4-acetaldehyde	Amino Acid Metabolism	69662.9	70236.7
111.888	27.8693	Selenium Sulfide		87365.1	89110.4
111.889	12.5947	Selenium Sulfide		93023.2	116555
111.906	12.5166	selenium dioxide		542615	536664
111.983	12.4036	Monomethyl sulfate		54328.3	36506.6
111.992	14.1491	Hydroxymethylphosphonate	Amino Acid Metabolism	334206	278172
112.027	11.8677	Uracil	Nucleotide Metabolism	236210	664962
114.032	14.7133	2-Hydroxy-2,4-pentadienoate	Amino Acid Metabolism	1.28368e+06	440406
115.063	12.7739	Proline	Amino Acid Metabolism	7.48222e+07	64075000
116.011	14.7677	Formylpyruvate		436508	346896
117.058	8.77079	Indole	Amino Acid Metabolism	136781	57429.3
117.058	11.6063	Benzeneacetonitrile	Xenobiotics Biodegradation and Metabolism	125978	112846
117.079	11.3217	5-Aminopentanoic acid	Amino Acid Metabolism	5.53667e+07	59975000
117.079	12.4794	Valine	Lipid Metabolism_Amino Acid Metabolism	2.04111e+07	19075000
118.027	14.6635	Succinic acid	Carbohydrate Metabolism	257938	159083
119.058	14.3923	Threonine	Amino Acid Metabolism	1.12869e+07	9225144
120.042	14.5847	Erythrulose	Carbohydrate Metabolism	1.01866e+06	291197
120.042	10.291	Threose	Carbohydrate Metabolism	205954	139610
120.042	12.2202	Erythrose	Carbohydrate Metabolism	98967.1	70635.6
122.048	7.86432	Niacinamide	Metabolism of Cofactors and Vitamins	4.7427e+06	3.0127e+06
125.015	14.7245	Taurine	Lipid Metabolism	3.12156e+06	1.96338e+06
125.048	12.1866	Aminohydroquinone		209226	161262
125.999	10.222	2-Hydroxyethanesulfonate	Amino Acid Metabolism	137002	143673
126.025	14.7275	2-(Methylthio)pyrazine		282704	323422
126.032	14.7908	2-oxohexa-4,5-cyclopropyl-5-enoate		184240	110870
126.032	16.4615	Triacetate lactone		157618	163747
126.043	14.9642	Thymine	Nucleotide Metabolism	72705.5	72976.4
126.104	4.26389	2-octenal	Lipid Metabolism	963410	985049
129.043	9.90195	Pyroglutamic acid	Amino Acid Metabolism	6.19318e+06	5.6025e+06
129.043	14.8298	4-Oxoproline	Amino Acid Metabolism	1.26497e+06	978020
129.058	8.80416	indole-3-carbinonium ion		60510.8	28418.6
129.079	7.86789	N4-Acetylaminobutanal	Amino Acid Metabolism	226474	99809.7
129.079	12.4333	Pipecolic acid	Amino Acid Metabolism	1.5974e+06	1.63994e+06
130.027	12.4242	Itaconic acid	Carbohydrate Metabolism	74129.3	61087.8
130.027	11.6492	2,5-Dioxopentanoate	Carbohydrate Metabolism	109507	89030.3
130.063	4.825	Ketoleucine	Amino Acid Metabolism	501581	527707
130.111	19.0962	N-Acetylputrescine	Amino Acid Metabolism	811245	846189
131.058	14.3278	N-Acetyl-beta-alanine	Amino Acid Metabolism	5.15111e+07	48375000
131.069	14.5976	Creatine	Amino Acid Metabolism	5.31889e+08	417250000
131.095	11.3154	Isoleucine	Amino Acid Metabolism	5.50333e+07	49025000
131.095	10.8909	Leucine	Lipid Metabolism_Amino Acid Metabolism	4.84667e+07	42650000
132.042	12.5396	3-hydroxy-3-methyl-2-oxo-butanoic acid	Amino Acid Metabolism	67894	59063.9
132.042	13.7062	4-Hydroxy-2-oxopentanoate	Amino Acid Metabolism	97781.5	80397.8
132.042	14.57	2-Acetolactate	Carbohydrate Metabolism_Amino Acid Metabolism	397630	138409
132.053	15.1606	Asparagine	Amino Acid Metabolism	1.98333e+07	22425000
132.09	22.0732	Ornithine	Amino Acid Metabolism	8.44633e+06	7.34101e+06
132.09	23.8879	(2R,4S)-2,4-Diaminopentanoate	Amino Acid Metabolism	324842	320344
133.037	14.6555	Aspartic acid	Amino Acid Metabolism	4.08219e+07	3.17537e+07
133.074	7.86681	3-nitro-2-pentanol		753179	609538
133.074	16.2216	1-deoxyxylonojirimycin		71181.2	62467.7
134.022	15.4961	Malic acid	Carbohydrate Metabolism	9.51873e+06	6.21462e+06
135.054	9.67881	Adenine	Nucleotide Metabolism	846882	678733
136.037	12.1334	2,3,4-trihydroxy-butanoic acid	Carbohydrate Metabolism	3.27375e+06	1.66921e+06
136.037	15.8418	Erythronic acid		1.31005e+06	571386
136.038	10.1823	Hypoxanthine	Nucleotide Metabolism	2.15111e+08	194250000
137.048	10.0915	1-carboxymethylpyridinium		153486	140196
138.043	12.2852	Urocanic acid	Amino Acid Metabolism	335288	363690
139.063	7.81743	Trigonelline	Metabolism of Cofactors and Vitamins	2.07556e+07	20850000
140.047	12.6262	beta-methylenecyclopropyl pyruvate		89517.7	83182.5
141.025	13.9814	2-Propanoylthiazole		128213	134283
142.074	12.9427	Ectoine	Amino Acid Metabolism	328431	325082
142.099	4.59929	2-Octenoic acid	Fatty Acyls [FA]_Lipid Metabolism	73158.2	55995.5
143.073	8.80832	2-Aminonaphthalene		285910	97728.3
143.073	11.5975	1-Naphthylamine	Xenobiotics Biodegradation and Metabolism	224669	239836
143.095	10.7499	Proline betaine		1.76332e+07	1.11799e+07
144.042	13.5581	Maleic acid homopolymer	Metabolism of Cofactors and Vitamins	247983	143964
144.053	13.9685	N-Nitrosoproline		182892	184844
145.053	8.81039	3-Methyleneoxindole		151703	61182.7
145.053	11.6101	1(2H)-Isoquinolinone		112336	124252
145.074	12.45	4-Acetamidobutanoic acid	Amino Acid Metabolism	2.20727e+06	78574.6
145.085	15.082	4-Guanidinobutanoic acid	Amino Acid Metabolism	198866	233236
145.11	13.3466	2-Aminoheptanoate	Lipid Metabolism	7.60015e+06	8.29925e+06
146.022	15.0102	2-hydroxyparaconate		2.29114e+06	1.26453e+06
146.058	12.6837	2-Aceto-2-hydroxybutanoic acid	Amino Acid Metabolism	269955	264872
146.069	14.9621	Glutamine	Amino Acid Metabolism	2.92111e+08	311000000
146.105	22.8498	Lysine	Amino Acid Metabolism	3.50657e+06	3.55778e+06
147.053	14.381	Glutamic acid	Amino Acid Metabolism	133400000	115625000
147.09	12.1277	N-hydroxyisoleucine		100261	167159
147.09	13.1001	Fagomine		47515.8	37069.9
148.037	14.7114	2-Hydroxyglutaric acid	Amino Acid Metabolism	1.24916e+07	1.04993e+07
149.051	11.5508	Methionine	Amino Acid Metabolism	3.08444e+07	29250000
149.069	15.6022	4-amino-4-deoxy-L-arabinose		84359.4	69112.2
150.017	16.9304	3-carboxy-2,3-dihydroxypropanoate	Carbohydrate Metabolism	258855	220130
150.053	14.19	Arabinose	Carbohydrate Metabolism	333841	200246
150.053	14.759	Ribulose	Carbohydrate Metabolism	355855	154994
150.053	12.2596	Xylose	Carbohydrate Metabolism	326597	186787
150.053	11.6063	Ribose	Carbohydrate Metabolism	847113	716713
150.054	9.28772	1-Methylhypoxanthine		107308	80584.7
150.068	4.81469	Hydrocinnamic acid	Amino Acid Metabolism	98205.3	19808.7
151.049	12.3161	Guanine	Nucleotide Metabolism	259341	251628
151.063	7.96176	4-Hydroxyphenylacetaldehyde-oxime	Amino Acid Metabolism	117700	130248
151.063	4.92148	N-Acetoxyarylamine		90748	80793.2
152.068	12.9282	Arabitol	Carbohydrate Metabolism	149831	130760
152.12	4.27517	Alpha-Pinene-oxide	Lipid Metabolism_Lipid Metabolism_Prenol Lipids [PR]	317130	375166
153.079	7.81376	Dopamine	Amino Acid Metabolism	1.2145e+06	1.1696e+06
154.074	13.9737	cyclo(glycyl-L-prolyl)		62265.4	53877.4
155.069	14.6126	Histidine	Amino Acid Metabolism	5.22111e+07	52875000
155.069	15.7205	2-Amino-3-(1-pyrazolyl)propanoic acid		1.18175e+06	1.07984e+06
156.017	9.66264	Orotic acid	Nucleotide Metabolism	38526.2	41392.3
156.053	10.7834	4-Imidazolone-5-propionic acid	Amino Acid Metabolism	80421.6	62176.7
158.044	13.602	Allantoin	Nucleotide Metabolism	60082.3	30789.9
159.09	12.3121	5-Acetamidovalerate	Amino Acid Metabolism	5.70626e+06	2.96866e+06
159.126	13.3288	DL-2-Aminooctanoic acid		8.30023e+06	1.34001e+07
160.085	10.9456	Alanyl-D-alanine	Amino Acid Metabolism	18938.5	122756
160.11	4.81009	Hydroxyoctanoic acid	Lipid Metabolism	73717	74579.7
160.121	22.3266	Carnitinamide		104110	45498.9
161.032	7.84705	A-Ketoglutaric acid oxime		75021.4	52907.7
161.069	11.1328	Aminoadipic acid	Amino Acid Metabolism	2.15037e+06	719835
161.069	14.5468	N-methyl-L-glutamic Acid	Energy Metabolism	190137	155392
161.105	13.2631	Carnitine	Amino Acid Metabolism	2.03227e+07	2.00137e+07
162.035	7.9271	1,2-Dihydroxy-3-keto-5-methylthiopentene	Amino Acid Metabolism	47741.5	59336.9
162.053	12.4314	3-Ethylmalate	Carbohydrate Metabolism	697900	587084
162.053	13.5354	2-Hydroxy-2-ethylsuccinic acid	Carbohydrate Metabolism	191961	166217
163.084	15.798	DMDP		96682.2	92101.9
164.032	12.324	2-Dehydro-D-xylonate		70295.5	35177.4
164.069	11.3415	Rhamnose	Carbohydrate Metabolism	129551	116378
165.042	13.7588	4-Pyridoxolactone	Metabolism of Cofactors and Vitamins	187776	129171
165.046	13.291	Methionine sulfoxide	Amino Acid Metabolism	974710	908237
165.079	10.2174	Phenylalanine	Amino Acid Metabolism	1.44444e+07	13475000
166.048	12.6096	Arabinonate	Carbohydrate Metabolism	1.16524e+06	938367
166.048	13.1829	2,3,4,5-Tetrahydroxypentanoic acid	Carbohydrate Metabolism	1.48886e+06	906901
166.084	12.3131	3-deoxy-D-galactose		215096	139741
167.058	8.10093	Pyridoxal	Metabolism of Cofactors and Vitamins	176537	160371
167.982	15.4767	3-Phosphonopyruvate	Amino Acid Metabolism	77969.3	83138.4
167.982	17.0709	Phosphoenolpyruvic acid	Carbohydrate Metabolism	429448	331057
167.982	12.4439	hydroxypyruvaldehyde phosphate		118315	43837.4
169.004	15.059	Cysteic acid	Amino Acid Metabolism	76259.7	62646.6
169.05	14.7957	Phosphodimethylethanolamine	Lipid Metabolism	50720.3	35914.2
169.074	8.25359	Pyridoxine	Metabolism of Cofactors and Vitamins	4.92997e+06	4136141
169.998	14.9619	Dihydroxyacetone phosphate	Carbohydrate Metabolism	5.50581e+06	1.94327e+06
171.053	7.82064	Tetrahydrodipicolinate	Amino Acid Metabolism	171379	147006
171.064	14.793	Metronidazole		134505	159329
172.014	14.6214	Glycerol 3-phosphate	Lipid Metabolism	3.92366e+06	3.12876e+06
172.048	15.0064	Hydantoin-5-propionic acid	Amino Acid Metabolism	361497	380457
173.048	7.80772	Quinaldic acid		279572	209066
173.08	14.1505	2-Oxoarginine	Amino Acid Metabolism	242177	267192
173.105	11.7987	N-Acetylleucine		1.05131e+06	523887
174.016	17.231	Dehydroascorbic acid	Carbohydrate Metabolism	217710	83563.1
174.079	7.82449	1H-Indole-3-acetamide	Amino Acid Metabolism	506739	413787
174.1	13.4913	Theanine		283406	154244
174.1	9.01988	prolinylglycine		7917.61	114249
174.112	23.8952	Arginine	Amino Acid Metabolism	1.67778e+07	16125000
174.137	21.3086	Ne,Ne dimethyllysine		101084	85515.8
175.048	14.1785	N-Acetyl-L-aspartic acid	Amino Acid Metabolism	143323	90909.3
175.096	15.8424	Citrulline	Amino Acid Metabolism	17800000	18373046
175.121	11.6961	D-desosamine		112998	246099
175.121	11.2569	D-desosamine		405138	553459
175.121	12.6337	D-desosamine		916899	1.05564e+06
176.043	16.2006	Ureidosuccinic acid	Nucleotide Metabolism	967111	947753
176.08	12.1944	N5-formyl-N5-hydroxy-L-ornithine		19892.6	115709
176.08	11.5254	Alanyl-Serine	Peptide	45898.5	263979
177.064	12.7931	4-Hydroxy-4-methylglutamate	Carbohydrate Metabolism	197950	107014
177.997	11.1485	Arsenobetaine		31176.1	94878.5
178.03	7.81769	3,3'-Thiobispropanoic acid		260942	146940
178.048	11.6315	2-Keto-3-deoxy-D-gluconic acid	Carbohydrate Metabolism	5.59937e+06	4.61828e+06
178.048	12.2595	2,4,6/3,5-Pentahydroxycyclohexanone	Carbohydrate Metabolism	2.63563e+06	1.68208e+06
179.058	8.0382	Hippuric acid	Amino Acid Metabolism	511769	337800
179.058	6.76106	N-Acetylanthranilate		116173	109259
179.079	16.3664	Glucosamine	Carbohydrate Metabolism	393470	557773
180.054	13.9807	Nicotinuric acid	Metabolism of Cofactors and Vitamins	77697.2	77573.5
180.063	14.7184	Glucose	Carbohydrate Metabolism	5.99905e+06	1.64134e+06
180.063	14.3185	Mannose	Carbohydrate Metabolism	4.87045e+06	1.25104e+06
180.063	12.4828	Galactose	Carbohydrate Metabolism	1.39851e+07	12975000
180.063	13.2105	Fructose	Carbohydrate Metabolism	2.58911e+06	741641
180.063	16.9954	myo-Inositol	Carbohydrate Metabolism	1895940	2.11371e+06
181.074	7.81211	Beta-Tyrosine	Amino Acid Metabolism	302655	308367
181.074	12.9345	Tyrosine	Amino Acid Metabolism_Biosynthesis of Secondary Metabolites	3.15778e+07	26900000
181.096	10.1832	6-Methyltetrahydropterin		987017	947917
182.058	8.52938	Hydroxyphenyllactic acid	Amino Acid Metabolism	132301	112618
182.079	13.9341	Mannitol	Carbohydrate Metabolism	49300000	45875000
183.053	7.81468	4-Pyridoxic acid	Metabolism of Cofactors and Vitamins	278778	284631
183.066	14.7715	Phosphorylcholine	Lipid Metabolism	20000000	1.55322e+07
185.069	7.91799	2'-hydroxypyridoxol		67762.6	41315.6
185.105	4.83781	8-keto-7-aminoperlagonate		127607	75193
185.105	11.1715	Otonecine		593284	739225
185.105	11.8868	Pseudoecgonine	Biosynthesis of Secondary Metabolites	333940	508856
185.993	17.579	2-Phospho-D-glyceric acid	Carbohydrate Metabolism	211301	102753
185.993	16.4634	2-Hydroxy-3-(phosphonatooxy)propanoate	Carbohydrate Metabolism	2.12523e+06	1.28952e+06
186.064	14.11	AMPA		69396.6	55313.1
186.1	13.993	Alanyl-Proline	Peptide	297234	159717
186.101	11.3309	Alanyl-Proline	Peptide	1.12001e+06	7.09979e+06
187.063	8.79981	Indoleacrylic acid		2.34646e+06	967516
187.085	7.96652	2-Keto-6-acetamidocaproate	Amino Acid Metabolism	52633.9	53667.8
187.121	11.8299	8-Amino-7-oxononanoate	Metabolism of Cofactors and Vitamins	4.2662e+06	6.26309e+06
188.066	12.0126	1-(Methylthio)-5-phenyl-1-penten-3-yne		103029	66165.3
188.116	7.89437	N6-Acetyl-L-lysine	Amino Acid Metabolism	172619	1.41172e+06
188.116	13.764	Glycylleucine	Peptide	730771	505850
188.116	12.1459	6-Acetamido-3-aminohexanoate		409497	611363
188.153	21.6186	N6,N6,N6-Trimethyl-L-lysine	Amino Acid Metabolism	3.22187e+06	2.18164e+06
189.111	15.1163	Homocitrulline		205794	168363
190.059	16.11	alpha-Amino-gamma-oxalylaminobutyric acid		102215	145686
190.059	15.0337	Carglumic acid	Amino Acid Metabolism	332409	338269
190.095	14.1376	N5-acetyl-N5-hydroxy-L-ornithine		2.17082e+06	1.44492e+06
190.095	11.9006	Threoninyl-Alanine	Peptide	818588	957583
190.095	11.1899	N5-acetyl-N5-hydroxy-L-ornithine		19198	90576.7
190.172	4.24268	3,5,7-Trimethyl-undecatetraene	Lipid Metabolism	3.69189e+06	4.12224e+06
191.079	12.5283	2-amino-3,7-dideoxy-D-threo-hept-6-ulosonate		115662	127209
191.079	11.944	2-amino-3,7-dideoxy-D-threo-hept-6-ulosonate		107284	95161.7
191.116	10.1108	mycaminose		261536	311369
191.116	12.5528	mycaminose		228039	194375
193.041	12.7591	thiomethyl glutamate		140193	128628
193.041	10.8049	thiomethyl glutamate		150251	78631.9
193.041	14.3655	thiomethyl glutamate		223705	241500
194.043	14.086	Glucuronate	Carbohydrate Metabolism	701126	629995
194.079	12.4278	1-O-Methyl-myo-inositol	Carbohydrate Metabolism	51007.3	32949.2
195.066	12.2901	D,L--methylphosphinothricin		268498	156335
195.074	12.1772	Glucose oxime		107356	58376.2
195.074	16.9284	2-Amino-2-deoxy-D-gluconate	Carbohydrate Metabolism	162641	460198
196.041	8.03569	1-thio--D-glucose		250062	150705
196.058	13.9563	Altronate	Carbohydrate Metabolism	5.82623e+06	3.91521e+06
196.058	13.1322	Gluconic acid	Carbohydrate Metabolism	2.01778e+07	20625000
197.069	7.85402	N-Hydroxy-L-tyrosine	Amino Acid Metabolism	300166	233434
197.116	12.2681	Histidine trimethylbetaine	Amino Acid Metabolism	17400000	17600000
199.048	7.81106	Clavulanate	Biosynthesis of Secondary Metabolites	124092	90087.6
199.085	8.34277	2-Acetyl-1,5,6,7-tetrahydro-6-hydroxy-7-(hydroxymethyl)-4H-azepine-4-one		48669.2	21977.4
199.121	10.466	Neotussilagine		199343	205979
201.136	10.5953	Capryloylglycine		80164.7	127043
202.027	14.9819	Bergaptol		282887	224963
202.045	14.39	phenyl sulfoxide		7.42244e+06	3215864
202.045	16.9495	phenyl sulfoxide		1.74147e+06	1.93155e+06
202.045	13.5285	phenyl sulfoxide		5.67609e+06	4.71692e+06
202.095	12.6291	Proclavaminic acid	Biosynthesis of Secondary Metabolites	33855	166703
202.132	7.84577	Leucyl-Alanine	Peptide	27125.3	516292
202.132	12.7714	Isoleucyl-Alanine	Peptide	2.54497e+06	2.58707e+06
203.058	8.94823	Indolepyruvate	Amino Acid Metabolism	60853.9	29312.7
203.079	12.1329	N-acetyl-L-2-aminoadipate(2-)	Amino Acid Metabolism	4.99197e+06	3870466
203.09	11.6848	Alanyl-Asparagine	Peptide	0	130778
203.116	11.0329	Acetylcarnitine	Amino Acid Metabolism	2.83667e+07	24125000
203.127	16.7035	Lysyl-Glycine	Peptide	55774.5	193020
204.074	14.2484	beta-aspartyl-L-alanine	Peptide	108645	96291.9
204.075	15.8338	Alanyl-Aspartic acid	Peptide	60530.2	117625
204.075	15.0262	gamma-Glutamylglycine		103242	184315
204.09	11.6141	Tryptophan	Amino Acid Metabolism	7.7889e+06	7.79127e+06
204.111	11.8738	2,6-dideoxy-2-acetamidino--L-galactose		877037	1.09411e+06
204.111	17.8203	N6-Acetyl-N6-hydroxy-L-lysine	Amino Acid Metabolism	219136	228831
204.111	9.24574	N6-Acetyl-N6-hydroxy-L-lysine	Amino Acid Metabolism	0	130692
204.147	20.2285	3-Hydroxy-N6,N6,N6-trimethyl-L-lysine	Amino Acid Metabolism	113151	89126
205.095	11.4894	casuarine		1.35485e+06	1.37724e+06
205.095	10.7731	N-Acetyl-D-fucosamine		469291	358970
205.998	16.2806	2-chloro-3-methyl-maleylacetate		113604	104617
206.079	13.737	Diethyl tartrate		72504.2	42123.4
206.09	11.889	N-hydroxy DAP		15501.9	128179
207.093	7.85044	CHES	Medium Component	695243	1.4805e+06
207.111	13.3236	N-Ethylglycocyamine		121480	135686
207.126	8.13674	3-(Dimethylamino)propyl benzoate		143953	42648.6
208.022	15.8332	Garcinia acid		1.11346e+06	453683
208.085	10.9057	Kynurenine	Amino Acid Metabolism	104909	56637.6
208.183	4.27382	FA (14:2) tetradecadienal	Lipid Metabolism	952418	945276
209.069	4.4522	N-Benzyloxycarbonylglycine		878303	968313
209.069	7.80702	Hydroxyphenylacetylglycine	Amino Acid Metabolism	506712	459027
209.992	15.2294	acibenzolar-S-methyl		145172	115109
210.038	16.4931	Glucaric acid	Carbohydrate Metabolism	59109.7	39792
210.074	13.5263	Sedoheptulose	Energy Metabolism	84765.1	78263.9
210.074	11.764	beta-D-Sedoheptulopyranose		76442.7	71309.8
211.036	14.7947	Phosphocreatine	Amino Acid Metabolism	622190	331217
212.009	13.0073	phosphinomethylmalate		617058	264826
212.009	15.0568	P-DPD		398209	458717
212.009	12.2182	phosphinomethylisomalate		729837	493452
212.141	4.29499	Traumatin	Lipid Metabolism	53747.6	42918.2
213.111	14.1442	Methyl 2-diazoacetamidohexonate		1.18942e+06	1.33497e+06
214.132	8.57236	Dethiobiotin	Metabolism of Cofactors and Vitamins	41463.1	321309
214.132	5.71066	Dethiobiotin	Metabolism of Cofactors and Vitamins	1544.68	116390
215.056	15.5665	sn-glycero-3-Phosphoethanolamine	Lipid Metabolism	461841	432844
215.116	12.7021	2-Amino-9,10-epoxy-8-oxodecanoic acid	Lipid Metabolism	52384.5	62994.7
216.04	13.4376	2-C-Methyl-D-erythritol 4-phosphate	Lipid Metabolism	486848	256056
216.111	11.3616	gamma-Glutamyl-gamma-aminobutyraldehyde	Amino Acid Metabolism	482525	2.00541e+06
216.147	7.80893	Valyl-Valine	Peptide	0	384345
217.131	9.82828	Propionylcarnitine	Lipid Metabolism	3.73496e+06	4.09784e+06
218.09	14.6285	gamma-Glutamylalanine	Peptide	41731.4	295502
218.102	23.8895	1,6,8-trimethylallantoate		157353	143350
218.127	17.0465	Lysopine	Amino Acid Metabolism	357256	290496
218.127	7.91173	Isoleucyl-Serine	Peptide	71649.9	706732
220.07	15.2935	beta-aspartyl-L-serine	Peptide	103437	251326
220.085	10.8207	5-Hydroxy-L-tryptophan	Amino Acid Metabolism	627183	663033
220.085	10.8169	N2-hydroxy-L-tryptophan		120332	114300
220.085	9.74224	N2-hydroxy-L-tryptophan		107185	81554.8
220.106	10.9355	3-[4-amino-3-hydroxybutyl]-hydroxy-carbamoyl-propanoate		5942.84	128409
220.106	13.0414	N-Acetyl-b-glucosaminylamine		105319	107237
221.09	12.1337	N-Acetyl-D-glucosamine	Amino Acid Metabolism	2.65667e+06	1.96988e+06
221.126	13.3391	D-galactopyranosyl trimethylammonium bromide		224253	373295
222.074	14.1348	(3,4,5,6-tetrahydroxyoxan-2-yl)methyl acetate		415562	427316
222.1	7.82771	Phenylalanyl-Glycine	Peptide	15655.8	332761
223.106	12.0976	N-acetyl -D- glucosaminitol		790137	706965
223.106	13.2642	N-acetyl -D- glucosaminitol		768343	854677
224.091	9.47162	Temurin		53838.6	244085
225.064	12.1536	4-Amino-4-deoxychorismate	Metabolism of Cofactors and Vitamins	69927.2	62182.8
225.064	12.7307	4-Amino-4-deoxychorismate	Metabolism of Cofactors and Vitamins	325626	294898
225.064	11.3705	2-amino-2-deoxy-isochorismate		113179	103150
225.1	4.48708	2-amino-3-(4-hydroxy-3-methoxyphenyl)-2-methylpropanoic acid		534801	747630
226.069	14.6055	2,3,4,5,6,7-Hexahydroxyheptanoic acid		173675	90938
226.069	13.8471	2,3,4,5,6,7-Hexahydroxyheptanoic acid		150213	115323
226.107	11.1983	6-(L-Erythro-1,2-Dihydroxypropyl)-5,6,7,8-tetrahydro-4a-hydroxypterin		71338.6	588967
226.107	11.7425	6-(L-Erythro-1,2-Dihydroxypropyl)-5,6,7,8-tetrahydro-4a-hydroxypterin		96141.3	1.02036e+06
226.193	4.02151	trans-Tetra-dec-2-enoic acid	Lipid Metabolism	110444	89469.3
228.003	15.2596	PA		88415	75859.9
228.122	14.8812	Deoxyguanidinoproclavaminic acid	Biosynthesis of Secondary Metabolites	166823	131197
228.147	13.026	Leucylproline	Peptide	1.34325e+06	1.5175e+06
228.147	10.2166	Isoleucylproline	Peptide	3.75692e+06	3994299
228.209	4.01272	Myristic acid	Fatty Acyls [FA]_Lipid Metabolism	1.77562e+06	1.52915e+06
229.058	14.3815	4-(L-Alanin-3-yl)-2-hydroxy-cis,cis-muconate 6-semialdehyde	Amino Acid Metabolism	160560	134925
229.088	14.7306	Ergothioneine	Amino Acid Metabolism	6.26211e+06	6.21766e+06
229.106	12.4605	Gly/Gly/Pro	Peptide	287778	1.62915e+06
229.106	13.1366	Asparaginyl-Proline	Peptide	407372	2.19936e+06
229.106	13.5835	Asparaginyl-Proline	Peptide	741730	794531
230.019	15.1944	Ribose 5-phosphate	Carbohydrate Metabolism	745080	390954
230.051	15.0022	6-Methoxy-3-(2-thiazolyl)-1H-indole		320243	380277
230.09	15.0271	Aspartyl-L-proline	Peptide	1.31606e+06	2.41339e+06
230.09	15.031	N-acetyl-tabtoxinine--lactam		1.90469e+06	3.22956e+06
230.163	7.81681	Isoleucyl-Valine	Peptide	11746	566694
231.111	4.84804	N-(3-oxohexanoyl)-L-homoserine		269344	291519
231.122	10.1235	Ala/Ala/Ala	Peptide	0	185468
231.147	8.90325	Butyrylcarnitine	Lipid Metabolism	513007	667788
232.055	13.3148	5-[5-(Methylthio)-4-penten-2-ynyl]-2-furanacrolein		93771.6	80991.6
232.106	13.1879	N2-Succinyl-L-ornithine	Amino Acid Metabolism	58301.1	408033
232.131	4.82838	1,2-dibutyrin		50485.2	23120.2
232.142	7.85334	Isoleucyl-Threonine	Peptide	0	203986
233.093	12.305	Lomustine		605693	596864
233.102	12.5058	Ala/Gly/Ser	Peptide	29590.4	425508
233.137	12.9618	Lysyl-Serine	Peptide	77719	84386.9
233.138	16.5698	Lysyl-Serine	Peptide	84899.6	326515
234.085	15.1588	beta-aspartyl-L-threonine	Peptide	90937.3	305554
236.08	12.0629	N'-Formylkynurenine	Amino Acid Metabolism	59636.7	45207
237.031	16.7211	Cysteinosuccinic acid		225678	201011
237.031	12.9972	Cysteinosuccinic acid		123911	101340
237.085	14.7738	Fructoseglycine		182587	90819.9
237.085	16.0272	N-Acetyl-D-glucosaminate		127903	101243
237.085	12.6764	N-Glycolyl-D-glucosamine		372552	277252
237.085	12.0598	N-Acetyl-D-glucosaminate		654606	488112
238.098	10.3459	15(R)-hydroperoxy-EPE	Medium Component	3.90778e+08	272750000
238.098	9.9753	15(R)-hydroperoxy-EPE	Medium Component	1.90333e+08	140000000
238.099	9.61687	15(R)-hydroperoxy-EPE	Medium Component	6.29111e+07	44100000
239.079	4.76236	2-{[(3,5-dimethoxyphenyl)(hydroxy)methylidene]amino}acetic acid		945491	963112
239.08	7.8001	2-{[(3,5-dimethoxyphenyl)(hydroxy)methylidene]amino}acetic acid		521564	560225
239.102	9.82922	Dihydrobiopterin	Metabolism of Cofactors and Vitamins	13063240	9.02171e+06
240.024	15.9982	Cystine	Amino Acid Metabolism	71482	56685.9
240.085	14.7812	glycero-L-galacto-Octulose		211275	169132
240.122	14.2773	Homocarnosine	Amino Acid Metabolism	272776	177398
240.147	10.138	Slaframine	Biosynthesis of Secondary Metabolites	5.35417e+06	5.87838e+06
240.147	10.8411	Slaframine	Biosynthesis of Secondary Metabolites	1.21634e+06	1.41538e+06
240.147	11.2994	Slaframine	Biosynthesis of Secondary Metabolites	1.20117e+06	1.28101e+06
240.147	12.8488	Pirbuterol	Xenobiotics Biodegradation and Metabolism	1.63063e+06	1.63017e+06
241.095	4.82789	Methocarbamol		636034	801925
241.095	7.82222	Methocarbamol		127856	162655
241.635	18.0927	Ala/Ile/Pro/Pro/Ser	Peptide	653473	520045
242.019	13.5925	6-deoxy-5-ketofructose-1-phosphate		152919	213445
242.019	14.8029	6-deoxy-5-ketofructose-1-phosphate		1.34544e+06	729092
242.019	15.6379	Inositol cyclic phosphate		1.3401e+06	494202
242.019	17.1269	Inositol cyclic phosphate		150534	118491
242.019	16.5735	methanofuran biosynththesis intermediate MF3		175002	263426
242.1	15.4617	erythro-D-galacto-octitol		215026	231010
242.225	3.97615	FA methyl(14:0)	Lipid Metabolism	872523	758904
243.085	13.5187	gamma-Glutamyl-beta-cyanoalanine	Amino Acid Metabolism	380931	341086
243.104	10.5824	Biotin amide		771857	766081
243.122	12.4255	Ala/Gly/Pro	Peptide	21514.8	157536
243.158	15.2292	Lysyl-Proline	Peptide	138229	831830
244.035	13.448	Fuculose 1-phosphate	Carbohydrate Metabolism	49428.9	43755.7
244.106	14.7223	dihydrothymidine		2.25666e+06	6.14771e+06
245.101	12.5034	Asparaginyl-Hydroxyproline		76161.7	68428.6
245.101	13.4977	Asparaginyl-Hydroxyproline		91654.2	71448.1
245.137	8.8627	Isoleucyl-Asparagine	Peptide	14231.5	167216
245.138	9.27525	Isoleucyl-Asparagine	Peptide	7813.55	301124
245.163	8.23248	2-Methylbutyroylcarnitine		289579	266884
245.174	13.8267	Lysyl-Valine	Peptide	109204	1.69636e+06
245.174	22.0984	Lysyl-Valine	Peptide	726398	598691
246.05	22.0614	rhamnitol-1-phosphate		87719.6	59294.2
246.051	12.3689	Glycerophosphoglycerol		362269	672136
246.096	13.5194	Asparaginyl-Asparagine	Peptide	3402.49	88454.6
246.122	12.1721	beta-aspartyl-L-leucine	Peptide	413553	467539
246.122	11.1986	gamma-Glutamylvaline	Peptide	56597.7	281157
246.122	11.6821	beta-aspartyl-L-leucine	Peptide	107150	311644
246.133	17.1023	N2-(D-1-Carboxyethyl)-L-arginine	Amino Acid Metabolism	251319	267195
246.137	8.80428	Lenticin		1.97679e+07	7.57266e+06
247.014	17.3561	2-Hydroxyacetaminophen sulfate		324912	258166
247.069	13.5906	N-Succinyl-L-glutamate	Amino Acid Metabolism	57872.1	67920.2
247.08	15.3639	Asparaginyl-Aspartic acid	Peptide	214978	252674
247.117	11.7956	Ala/Ala/Ser	Peptide	11179.6	377000
247.142	11.4232	Hydroxybutyrylcarnitine		550164	699997
247.153	15.8259	Lysyl-Threonine	Peptide	7282.62	165580
247.984	17.4247	4-bromodiphenyl ether		44088.8	26514.5
248.064	16.8793	Aspartyl-Aspartate	Peptide	316483	255704
249.04	13.482	Pyridoxine 5'-phosphate	Metabolism of Cofactors and Vitamins	200280	209378
249.121	11.8208	1-deoxy-1-morpholino-D-fructose		166709	233900
250.062	13.7882	gamma-Glutamylcysteine	Amino Acid Metabolism	84699.8	80433.8
251.094	11.2166	cycloguanil		123297	79634.5
251.1	14.1929	Muramic acid		3.09019e+06	2.50432e+06
252.038	22.0591	nicotine blue leuco form		77585.4	81806.2
252.122	12.0064	Prolyl-Histidine	Peptide	15864.2	260248
252.209	4.29838	FA (16:2)	Lipid Metabolism	857977	988541
254.1	13.7078	Galactosylglycerol	Carbohydrate Metabolism	409306	527364
254.152	4.24951	Gallicynoic acid A		67049.7	61995
254.225	3.95671	Palmitoleic acid	Lipid Metabolism_Lipid Metabolism	737405	516441
255.111	7.80111	N-D-Glucosylarylamine		200150	212150
256.121	7.80636	ancymidol		220586	255126
256.121	4.76263	ancymidol		434078	498987
256.24	3.9462	Palmitic acid	Fatty Acyls [FA]_Lipid Metabolism	3.38444e+07	30850000
257.102	14.4148	Glycerophosphocholine	Lipid Metabolism	1.01824e+07	5.87995e+06
257.112	14.1334	4a-Hydroxytetrahydrobiopterin		962161	1.05062e+06
258.033	13.1354	Lofexidine		135418	153337
259.037	16.9904	N-sulfo-D-glucosamine		89212.8	74527.4
259.046	14.2782	glycerophosphoserine		79665.1	76017.9
259.046	15.2724	glycerophosphoserine		252833	195265
259.046	16.5699	Glucosamine 6-phosphate	Amino Acid Metabolism	77223.6	105851
259.046	11.9757	glycerophosphoserine		1.33001e+06	1.09013e+06
259.117	11.0086	Linatine	Amino Acid Metabolism	169204	109573
260.012	12.573	Methyl-5-thio-D-ribose 1-phosphate	Amino Acid Metabolism	37158.5	33116.5
260.03	14.8086	Hexose phosphate	Carbohydrate Metabolism	1.26117e+07	5.00854e+06
260.03	15.6952	Fructose 6-phosphate	Carbohydrate Metabolism	4.00719e+06	1.76392e+06
260.03	16.4098	Glucose 6-phosphate	Carbohydrate Metabolism	4.26229e+06	4.2607e+06
260.137	10.7931	gamma-Glutamylisoleucine	Peptide	424166	452634
260.149	16.4639	Lysyl-Asparagine	Peptide	8303.64	108827
261.061	14.6671	2-amino-2-deoxyglucitol-6-phosphate		381481	377078
261.096	14.7221	Ala/Asp/Gly	Peptide	89442.5	153542
261.121	12.7297	Lotaustralin		3.67291e+06	4.39372e+06
261.121	12.3691	Mycosporine		2.10878e+06	672615
261.132	16.6571	Lysyl-Aspartate	Peptide	159188	195520
261.133	16.294	Gamma glutamyl ornithine	Peptide	368202	520832
261.133	18.0413	N6-beta-Aspartyllysine		238203	283301
261.133	13.2034	Thr/Ala/Ala	Peptide	88821.8	72173.9
261.158	10.6678	hydroxyisovaleroyl carnitine		1.78236e+06	2.28152e+06
262.046	14.8271	Sorbitol-6-phosphate	Carbohydrate Metabolism	6.63212e+06	4.92339e+06
262.08	16.7252	beta-aspartyl-L-glutamic acid	Peptide	161326	128633
262.08	13.8465	beta-aspartyl-L-glutamic acid	Peptide	139262	189110
263.112	15.2385	Ala/Ser/Ser	Peptide	84416.3	60925
264.105	20.6191	Thiamine	Metabolism of Cofactors and Vitamins	406528	390136
265.116	11.0428	1-[(3-Carboxypropyl)amino]-1-deoxyfructose		155292	131133
265.858	27.4709	3,5-dibromocatechol		334980	303064
265.96	17.5998	2,3-Diphosphoglyceric acid	Carbohydrate Metabolism	2.17769e+06	1.10355e+06
266.064	11.6226	5'-Oxoinosine		144596	146012
266.127	7.83755	Phenylalanyl-Threonine	Peptide	0	301222
267.096	16.7598	Neuraminic acid		139627	118015
267.097	9.21272	Adenosine	Nucleotide Metabolism	136724	139301
268.08	14.5613	2(alpha-D-Mannosyl)-D-glycerate		563028	399402
268.081	10.8786	Inosine	Nucleotide Metabolism	578164	279112
268.154	7.90581	Histidinyl-Leucine	Peptide	82555.7	582505
268.24	3.96345	10-methyl-hexadec-7-enoate		338756	238401
269.09	4.71942	2-{[hydroxy(2,3,4-trimethoxyphenyl)methylidene]amino}acetic acid		242067	295848
269.112	12.962	formycin A		37836.7	101894
270.096	16.5528	erythro-L-galacto-Nonulose		163394	169815
270.096	15.9628	erythro-L-galacto-Nonulose		74993.7	79460.3
270.097	14.467	6-Hydroxyl-1,6-dihydropurine ribonucleoside		226305	247799
270.22	4.02484	2-hexyl-3-oxodecanoate		98530.6	103977
270.256	3.92262	Heptadecanoic acid	Fatty Acyls [FA]_Lipid Metabolism	2.35607e+06	2.04429e+06
271.046	8.79212	PE		77885.1	41855.9
272.03	15.8053	(2,6-anhydro-3-deoxy-D-arabino-heptulopyranosid)onate 7-phosphate		1.52968e+06	858544
272.03	22.0621	(2,6-anhydro-3-deoxy-D-arabino-heptulopyranosid)onate 7-phosphate		239611	162393
272.115	4.79998	indole-3-acetyl-proline		69669.9	84733
272.235	4.05713	(2R,3S)-2-hexyl-3-hydroxydecanoate		73648.7	66559.9
275.032	13.1357	Phosphophosphinate		96489.8	63034.5
275.041	11.9635	2-amino-2-deoxy-D-gluconate 6-phosphate		81918.1	76201.8
275.094	10.5426	Cys/Gly/Pro	Peptide	1.9931e+06	1.7589e+06
275.112	14.2515	N2-gamma-Glutamylglutamine	Peptide	87337.8	135121
275.112	14.6149	N2-gamma-Glutamylglutamine	Peptide	50127.8	118919
275.148	11.489	Epsilon-(gamma-Glutamyl)-lysine		113709	92006.6
275.149	16.6871	Glutamyllysine	Peptide	49081.3	97807.3
275.173	9.2233	Hydroxyhexanoycarnitine		128135	162613
276.025	16.6335	2-Carboxy-D-arabinitol 1-phosphate		111856	70996
276.025	17.1511	6-Phosphogluconic acid	Carbohydrate Metabolism	230133	128372
276.096	16.3964	2,3-diacetamido-2,3-dideoxy--D-mannuronate		58368.9	65619.9
277.11	12.6356	Met/Ala/Gly	Peptide	1.77665e+06	2.03943e+06
277.996	15.0023	2-C-methyl-D-erythritol-2,4-cyclodiphosphate		85694.2	89987.2
278.066	14.7114	Pyrimidine 5'-deoxynucleotide		100529	102447
278.188	4.02584	1-(4-Hydroxy-3-methoxyphenyl)-3-decanone		275611	343429
278.225	3.93438	FA (18:3)	Lipid Metabolism	472665	355197
279.122	8.06467	Phenylalanyl-Asparagine	Peptide	0	92821.8
280.034	14.6894	1-Methoxyspirobrassinin		147972	196344
280.106	10.7549	N-carbobenzyloxy-L-glutamine		998.997	69250.5
280.24	3.92117	FA (18:2)	Lipid Metabolism	1.90111e+06	1.87154e+06
282.095	13.7304	Xylobiose		92427.4	99362.2
282.256	3.91134	octadecenoic acid	Lipid Metabolism	9.52251e+06	7.13728e+06
283.157	10.3778	6,7-Dihydro-4-(hydroxymethyl)-2-(p-hydroxyphenethyl)-7-methyl-5H-2-pyrindinium		1.34772e+06	1.2243e+06
283.164	16.1931	Lysyl-Histidine	Peptide	85679.6	556006
284.272	3.90007	Stearic acid	Fatty Acyls [FA]_Lipid Metabolism	4.08333e+07	37425000
287.111	15.2702	N-Ribosylhistidine		153264	120818
287.148	15.2493	Thr/Ala/Pro	Peptide	43935.1	251952
287.184	7.84978	Ile/Gly/Val	Peptide	16398	119608
287.246	4.28386	(8-hydroxydecyl)-(hydroxymethyl)-piperidin-ol	Lipid Metabolism	6.9675e+06	7.18222e+06
288.06	11.8593	Orotidine		2.58636e+06	7.59716e+06
289.127	13.119	Ophthalmic acid		214067	149977
289.139	16.3455	Aspartyl-Arginine	Peptide	212154	211092
289.164	9.08578	Ile/Ala/Ser	Peptide	56309.4	41261
289.164	13.7898	Ile/Ala/Ser	Peptide	0	118718
290.04	15.8238	Sedoheptulose 7-phosphate(2-)	Carbohydrate Metabolism	461478	258344
290.041	15.8115	2-Dehydro-3-deoxy-D-arabino-heptonate 7-phosphate	Amino Acid Metabolism	2.65715e+06	1.56354e+06
290.123	16.5134	N-(L-Arginino)succinate	Amino Acid Metabolism	723014	649142
291.096	12.8421	2-Deoxy-2,3-dehydro-N-acetylneuraminic acid		1.7173e+06	1.80196e+06
291.096	12.2707	2,7-Anhydro-alpha-N-acetylneuraminic acid		3.00157e+06	2.51203e+06
291.107	15.3722	Ala/Asp/Ser	Peptide	328230	362388
291.125	10.9634	Ile/Cys/Gly	Peptide	759012	689690
292.05	11.7126	Chlorosesamone		97721.9	82586.6
292.077	16.0211	(1,3-diphenylpropoxy)sulfonic acid		439022	510264
292.077	16.5561	(1,3-diphenylpropoxy)sulfonic acid		1.09525e+06	1.05516e+06
294.058	10.1712	3,4,5-trihydroxy-6-[(3-methoxy-3-oxopropanoyl)oxy]oxane-2-carboxylic acid		275936	320461
294.158	8.44224	Isoleucyl-Tyrosine	Peptide	84544.5	30266.9
295.091	15.2054	malyl alpha-D-glucosaminide		51653.7	34472.9
296.162	4.52001	Ovalicin		0	105278
297.089	7.83354	5'-Methylthioadenosine	Amino Acid Metabolism	5.11058e+06	3.5797e+06
297.18	21.5403	Diphthamide		188676	183483
298.055	4.10428	Quinalphos		563797	525066
298.074	7.92076	methyl-5'-thioinosine		172549	165188
298.251	3.96423	3-Oxooctadecanoic acid	Fatty Acyls [FA]_Lipid Metabolism	188603	161791
298.287	3.89418	Tuberculostearic acid	Lipid Metabolism	258765	266778
299.282	4.59693	Palmitoylethanolamide	Fatty Acyls [FA]_Lipid Metabolism	539611	695453
300.074	10.6868	diazaborine		197413	209574
300.074	9.34295	diazaborine		150754	166287
300.099	9.62675	6,7-Dihydroxy-5,4'-dimethoxy-flavylium	Lipid Metabolism	1.55223e+06	1.02891e+06
300.099	10.3494	6,7-Dihydroxy-5,4'-dimethoxy-flavylium	Lipid Metabolism	4.66056e+06	3.28076e+06
300.111	4.78424	5-Nitro-2-(3-phenylpropylamino)benzoic acid		331488	341253
300.143	12.2083	Ala/Asn/Pro	Peptide	2888.25	90758.1
300.267	3.96882	2-Hydroxystearic acid	Fatty Acyls [FA]_Lipid Metabolism	149405	88442.4
301.127	14.3984	Ala/Asp/Pro	Peptide	113119	435853
301.143	8.36144	Febrifugine		13070.8	234165
302.04	16.1026	2-O-methyl cyclic 3-deoxy-D-arabino-heptulosonate 7-phosphate		619987	387888
302.063	15.0567	Pyrogallol-2-O-glucuronide		129859	201501
302.225	3.97255	kauralexin B1		142724	107398
303.08	13.878	Chlorambucil		114560	93339.2
303.293	8.06498	benzalkonium		99172.5	98883.4
304.102	15.4692	Asn/Asp/Gly	Peptide	105151	87160
304.241	3.90582	kauralexin A1		380699	276616
305.122	14.5097	Glu/Ala/Ser	Peptide	449201	456377
306.052	11.9303	N-(4-oxoglutaryl)-L-cysteinylglycine		66920.8	41127.7
307.084	13.9865	Glutathione	Amino Acid Metabolism	1.18067e+08	112175000
307.102	16.6536	Asp/Ser/Ser	Peptide	85370.1	58042.4
308.035	13.8156	cis-Resveratrol 3-sulfate		158098	164186
308.158	21.1636	psicoselysine		50797.2	55089.8
309.105	15.1838	O-Acetylneuraminic acid		68364.5	85673.4
309.106	14.4861	O-Acetylneuraminic acid		360130	308080
309.106	13.0156	N-acetylneuraminate	Carbohydrate Metabolism	72676.9	42738.6
309.133	9.91565	Ala/Gly/Tyr	Peptide	0	236997
309.133	7.87772	Ala/Gly/Tyr	Peptide	68501.4	128051
309.986	17.1744	Ribose 1,5-bisphosphate	Carbohydrate Metabolism	43816.2	19083.7
310.089	14.6084	6-[2-carboxy-2-(hydroxymethyl)-2-methylethoxy]-3,4,5-trihydroxyoxane-2-carboxylic acid		168998	208193
310.514	16.3721	2'-phospho-cyclic ADP-ribose		80956.7	56401.1
311.122	14.3108	tunicamine		444547	165665
312.022	15.8307	Gamma-Glutamyl-Se-methylselenocysteine	Amino Acid Metabolism	1.04481e+06	732603
312.303	3.86763	Arachidic acid	Fatty Acyls [FA]_Lipid Metabolism	810190	730218
313.087	12.6102	Flunitrazepam		240848	220530
313.298	3.86463	Margaroyl-EA	Lipid Metabolism	911370	1.26807e+06
314.246	4.21084	9,10-DHOME	Fatty Acyls [FA]_Lipid Metabolism	51343.8	60422.3
315.143	14.244	Glu/Ala/Pro	Peptide	67359.6	320939
316.047	9.27025	sulfoquinovosyl-1-O-dihydroxyacetone		244416	234660
316.047	10.6509	sulfoquinovosyl-1-O-dihydroxyacetone		225965	234848
316.08	15.1291	2,5-dihydroxybenzoate 2-O--D-glucoside		186850	273561
316.09	14.3643	5-methoxycarbonylmethyluridine		521488	535176
317.159	10.776	Glu/Ala/Val	Peptide	62952.4	437352
318.117	15.1622	Ala/Asp/Gly/Gly	Peptide	86330.4	100540
318.133	9.76229	Tryptophyl-Asparagine	Peptide	33057.1	221260
318.154	15.9684	Ala/Ala/Ala/Ser	Peptide	878336	939479
318.154	17.8056	Ala/Thr/Ala/Gly	Peptide	535659	595835
319.067	14.5396	N-Gluconyl ethanolamine phosphate		463008	307578
319.084	12.9143	coptisine		3.10461e+06	1.81683e+06
319.669	4.38709	Ile/Pro/Pro/Gln/Trp	Peptide	121522	74857.5
320.035	14.9965	{2-hydroxy-5-[-3-phenylprop-2-enoyl]phenyl}oxidanesulfonic acid		169494	216695
320.045	9.53071	8-Chloro-5,7,4'-trihydroxy-3-C-methylflavanone	Lipid Metabolism	519163	520819
320.045	10.6252	8-Chloro-5,7,4'-trihydroxy-3-C-methylflavanone	Lipid Metabolism	423625	423952
320.051	16.0787	3-Deoxy-D-manno-octulosonate 8-phosphate	Glycan Biosynthesis and Metabolism	861146	540139
320.137	22.0649	Formylfusarochromanone		120964	64040.5
321.07	19.3468	Beta-Citryl-L-glutamic acid		349612	193814
321.099	12.6394	Homoglutathione		307907	311129
322.087	14.9894	sulfonic acid		154568	186263
322.138	15.0347	Avenic acid A		701311	810787
323.152	4.71591	Galipine		0	634467
324.153	16.6144	2'-deamino-2'-hydroxy-6'-dehydroparomamine		69963.7	52110
326.121	15.9654	2-O-alpha-L-Rhamnopyranosyl-D-glucopyranose		98659.1	97326.3
326.122	12.678	6,7-Dimethyl-8-(1-D-ribityl)lumazine	Metabolism of Cofactors and Vitamins	111979	127361
328.175	9.94677	Ala/Ala/Ala/Pro	Peptide	0	239812
329.051	12.1033	Nitisinone		520612	603379
330.095	14.9628	6-(5-ethyl-2,3-dihydroxyphenoxy)-3,4,5-trihydroxyoxane-2-carboxylic acid		581773	814001
330.256	3.8747	Docosapentaenoic acid (22n-6)	Lipid Metabolism	382102	344946
331.084	12.8091	Sanguinarine	Biosynthesis of Secondary Metabolites	332280	264826
332.052	14.3703	dIMP	Nucleotide Metabolism	1.14864e+06	774461
333.154	11.1138	Glu/Ser/Val	Peptide	77973	130479
334.057	15.0736	Nicotinamide ribotide	Metabolism of Cofactors and Vitamins	832130	931516
334.067	15.767	1-(sn-Glycero-3-phospho)-myo-inositol		109069	150129
334.185	15.3151	Lys/Thr/Ser	Peptide	200848	210334
335.133	15.8334	Glu/Ser/Thr	Peptide	565947	577174
335.133	14.6678	Glu/Ser/Thr	Peptide	1.38869e+06	596850
336.164	17.4672	N2-Fructopyranosylarginine		83262.4	43773.3
337.175	14.1283	Kyotorphin	Peptide	134785	247449
337.334	5.16413	erucamide		1.62063e+06	3.43997e+06
337.334	5.5543	erucamide		1.43608e+06	3.42922e+06
337.335	4.32368	erucamide		296642	668352
338.062	15.3306	AICAR	Nucleotide Metabolism	147453	148844
338.071	14.3542	Cys/Cys/Gly/Gly	Peptide	1.30342e+06	1.44873e+06
339.074	16.6544	glutathione sulfinate		4.38419e+06	4.25329e+06
339.996	15.0793	Fructose 2,6-bisphosphate	Carbohydrate Metabolism	1.22727e+06	62488.4
339.996	17.4799	Fructose 1,6-bisphosphate	Energy Metabolism	3.08608e+06	838163
341.162	10.4289	Magnoflorine		1.17045e+06	1.08791e+06
341.998	12.2477	2,2'-disulfonyl azobenzene		131282	136750
341.998	12.7335	2,2'-disulfonyl azobenzene		123835	118171
342.116	16.2016	Alpha-Lactose	Carbohydrate Metabolism	87278.8	68230.4
342.183	11.3119	7-(4-Hydroxy-3-methoxyphenyl)-5-methoxy-1-phenyl-3-heptanone		171513	167059
342.183	10.8865	7-(4-Hydroxy-3-methoxyphenyl)-5-methoxy-1-phenyl-3-heptanone		138619	107988
342.19	9.5308	Ala/Val/Gly/Pro	Peptide	37726.5	359321
346.16	15.5859	Asp/Gly/Arg	Peptide	237608	261127
346.16	17.6689	Asp/Gly/Arg	Peptide	225597	222990
347.063	13.4629	Adenosine monophosphate	Nucleotide Metabolism	7.14356e+06	4.40859e+06
347.063	14.7737	Guanosine 2',3'-cyclic phosphate	Nucleotide Metabolism	336999	153257
347.122	13.8862	Dide-O-methylsimmondsin		98151.7	85099.8
348.047	15.0766	Inosinic acid	Nucleotide Metabolism	5.69346e+06	4.70968e+06
348.201	15.2831	Lys/Thr/Thr	Peptide	184839	195266
351.117	14.9144	N-acetyl-9-O-acetylneuraminate		200972	350581
352.077	14.6803	7-Hydroxymethyl-12-methylbenz[a]anthracene sulfate		482629	120661
354.056	7.79535	Phenolsulfonphthalein	Medium Component	9.00478e+06	8.44596e+06
354.056	5.48812	Phenolsulfonphthalein	Medium Component	228710	207388
354.056	4.89357	Phenolsulfonphthalein	Medium Component	825300	699154
357.157	14.9724	deacetylcolchicine		228504	240766
358.084	14.9527	5,7-Dihydroxyflavone 7-benzoate	Lipid Metabolism	141343	237564
358.111	14.8965	melibionate		258159	209407
358.141	14.3493	Miroestrol		160550	151306
359.216	14.183	Ala/Lys/Ala/Ala	Peptide	159730	628564
360.164	14.2023	Ala/Pro/Ser/Ser	Peptide	94340.5	113235
361.094	12.2469	Chelirubine	Biosynthesis of Secondary Metabolites	298257	154738
362.143	14.1574	Ala/Ala/Asp/Ser	Peptide	198043	98057.7
363.058	16.3143	Guanosine 3'-phosphate	Nucleotide Metabolism	46722.7	30502.7
363.144	11.2633	phe-FMDP		154333	107822
364.12	9.28431	Trp/Cys/Gly	Peptide	259110	193728
365.126	11.6671	Glu/Met/Ser	Peptide	1.18107e+06	944148
368.344	5.42334	9,10-seco-5,7,10(19)-cholestatriene	Lipid Metabolism	100394	116770
369.084	12.6323	6-Hydroxy-R-acenocoumarol		117576	91878.5
370.007	17.7447	Sedoheptulose 1,7-bisphosphate	Energy Metabolism	84826.6	13909.6
370.153	4.78626	Thioridazine		0	486203
371.148	13.9259	Isradipine		843041	800219
373.148	16.4195	Glu/Glu/Pro	Peptide	146309	602522
374.137	10.216	Kievitone hydrate		8.56802e+06	5.94787e+06
374.137	10.1793	fumiquinazoline F-indoline-3'-ol		4.49955e+06	3.90455e+06
374.191	15.6294	Asn/Lys/Gly/Gly	Peptide	67629.8	74238.5
374.216	14.5414	Ala/Leu/Thr/Ala	Peptide	2.70784e+06	2.92393e+06
375.088	11.3518	Gravacridonolchlorine		163943	151333
376.094	12.115	Dehydromillettone	Lipid Metabolism	47192.2	48196
376.159	15.011	Ala/Thr/Ala/Asp	Peptide	150735	311116
376.159	16.9724	Asp/Val/Gly/Ser	Peptide	103764	94504
378.138	14.0258	Galactinoldihydrate		353595	246944
379.105	15.6568	Lactoylglutathione	Carbohydrate Metabolism	216085	69198.1
379.141	11.9616	Glu/Met/Thr	Peptide	100677	77828.8
379.249	7.83433	Sphingosine 1-phosphate	Lipid Metabolism	154495	143106
381.12	13.2504	Oxopurpureine		102831	95488.4
381.121	14.8404	Oxopurpureine		126923	59771.7
381.172	8.79359	Ile/Cys/Phe	Peptide	116946	104754
381.193	10.6942	prebassianin A		125141	76511.2
381.264	4.8401	Sphinganine 1-phosphate	Lipid Metabolism	224078	286764
382.131	10.7611	Cys/Phe/Gly/Gly	Peptide	68535.9	47675.1
383.108	14.1406	Succinyladenosine		196241	121176
383.143	13.7477	N-Acetyllactosamine		849716	1.00362e+06
383.18	10.8187	Asn/Gly/Pro/Pro	Peptide	305577	488716
384.121	13.6054	Adenosylhomocysteine	Amino Acid Metabolism	369621	313787
385.319	4.70847	Pentadecanoylcarnitine		293127	283639
387.041	18.4121	glutathione-sulfite		162350	156314
388.125	16.1576	Sulfinpyrazone sulfide		128104	131181
390.175	16.8284	Ala/Val/Asp/Ser	Peptide	69670.4	84715.1
391.062	11.3409	Glucoconringiin		139641	131329
392.293	4.72903	3b,12a-Dihydroxy-5a-cholanoic acid	Lipid Metabolism_Lipid Metabolism_Lipid Metabolism	86562.2	66347.2
394.116	16.9576	Ala/Asp/Cys/Ser	Peptide	155721	208451
394.116	16.9605	5-hydroxy-9-methoxycamptothecin		57660.4	80564.9
394.126	13.9048	Aloesin		277607	250600
397.319	4.75888	trans-Hexadec-2-enoyl carnitine		335926	337188
398.137	16.4897	Adenosylmethionine	Amino Acid Metabolism	1.74754e+06	1.34821e+06
399.335	4.69118	Palmitoylcarnitine	Lipid Metabolism	7030664	6.58912e+06
402.19	7.97237	Thr/Trp/Pro	Peptide	0	183594
404.002	15.8705	Uridine 5'-diphosphate	Nucleotide Metabolism	692682	747362
408.114	14.9041	Cys/Cys/Pro/Ser	Peptide	420235	428097
408.147	15.3424	Thr/Trp/Cys	Peptide	104622	108215
408.287	7.80545	3a,7a,12b-Trihydroxy-5b-cholanoic acid	Lipid Metabolism_Lipid Metabolism	241214	157986
408.288	4.83059	3a,7a,12b-Trihydroxy-5b-cholanoic acid	Lipid Metabolism_Lipid Metabolism	196186	165119
410.1	13.8924	Gericudranins B	Lipid Metabolism	186301	161772
410.243	4.7263	LysoPA(0:0/16:0)	Lipid Metabolism_Lipid Metabolism	140729	141937
410.243	7.81169	LysoPA(0:0/16:0)	Lipid Metabolism_Lipid Metabolism	102602	103319
411.131	13.8393	Met/Met/Met	Peptide	103947	88405.2
412.093	10.1738	Patientoside A		771654	925439
413.35	7.81806	Heptadecanoyl carnitine		490999	531111
413.35	4.71053	Heptadecanoyl carnitine		888040	904768
415.098	14.7819	6-Heptenyl glucosinolate		90700.9	77815.7
415.253	11.2509	Ala/Leu/Gly/Arg	Peptide	136930	152860
415.253	10.9037	Ala/Val/Ala/Arg	Peptide	120449	136538
416.042	15.4921	5-{[-3-(3,4-dihydroxyphenyl)prop-2-enoyl]oxy}-3-hydroxy-4-(sulfooxy)cyclohex-1-ene-1-carboxylic acid		97078.8	92813.5
416.19	9.94075	Asp/Val/Pro/Ser	Peptide	296546	416623
418.243	21.3522	19-dimethylarsinoyl-nonadecanoic acid		122766	119157
422.077	12.9567	7-chloro-2-(3,4-dimethoxyphenyl)-8-hydroxy-3,5,6-trimethoxy-4H-chromen-4-one		111376	84817.4
422.085	12.9748	Mangiferin		106921	151903
423.142	14.9613	Asn/Thr/Cys/Ser	Peptide	188087	225923
423.334	7.78857	Linoelaidyl carnitine	Fatty Acyls [FA]	709045	722304
423.335	4.64785	Linoelaidyl carnitine	Fatty Acyls [FA]	1.39249e+06	1.33054e+06
424.037	14.5185	Thiamine pyrophosphate	Carbohydrate Metabolism	101016	138952
424.189	14.2783	Phe/Cys/Arg	Peptide	207540	216138
425.35	7.78428	Octadecenylcarnitine		3.95951e+06	4.17191e+06
425.35	4.61431	Oleoylcarnitine		7.82763e+06	7.32079e+06
426.025	15.0847	Axillarin 7-sulfate	Lipid Metabolism	66884.3	59272.4
426.088	16.6655	Asp/Cys/Cys/Ser	Peptide	1.06683e+06	473807
427.029	14.7644	ADP	Energy Metabolism	6.4362e+06	2.96824e+06
427.03	16.0504	ADP	Energy Metabolism	421010	169508
427.253	13.8199	Arg/Val/Gly/Pro	Peptide	2596.87	124031
427.366	7.78007	Stearoylcarnitine		3.49815e+06	4.53833e+06
427.366	4.59668	Stearoylcarnitine		7.13842e+06	7511984
428.366	3.99512	Cholesteryl acetate	Lipid Metabolism	496367	604851
429.222	14.655	Asn/Leu/Pro/Ser	Peptide	90545.9	266288
430.066	15.024	CMP-2-aminoethylphosphonate	Amino Acid Metabolism	1.51167e+06	1.10446e+06
430.162	11.6103	Aliarin 4'-methyl ether	Lipid Metabolism	59500.4	56873.8
431.049	13.8229	cytidine 5'-{[hydroxy(2-hydroxyethyl)phosphonoyl]phosphate}		185698	182112
434.042	17.5709	Halosulfuron-methyl		190979	147448
436.143	14.1116	Glu/Cys/Trp	Peptide	72167.1	54625
436.259	4.68581	LysoPA(0:0/18:1)	Lipid Metabolism_Lipid Metabolism	73118.4	63538.7
437.291	7.80534	PE(P-16:0e/0:0)	Lipid Metabolism	234467	233360
439.243	10.8942	Asn/Leu/Pro/Pro	Peptide	271541	336927
440.093	15.9199	9,10-dibromo-stearic acid	Lipid Metabolism	107022	106885
440.093	14.8094	9,10-dibromo-stearic acid	Lipid Metabolism	399958	77208.6
443.024	17.4955	Guanosine diphosphate	Nucleotide Metabolism	109378	104253
445.254	13.3664	Ala/Leu/Lys/Asp	Peptide	54106.1	67758
446.06	16.0324	CDP-Ethanolamine	Lipid Metabolism	334481	482176
447.159	15.7812	coelenterazine v		101933	104597
447.335	4.59069	N-Stearoyl tyrosine	Lipid Metabolism	429989	535216
448.123	15.129	4-Hydroxy-5-(3',4',5'-trihydroxyphenyl)-valeric acid-O-methyl-O-glucuronide		168217	157673
449.315	4.72639	Deoxycholic acid glycine conjugate	Lipid Metabolism_Lipid Metabolism	96773.1	79567.9
453.287	4.75887	sn-glycero-3-phospho-N-(palmitoyl)ethanolamine		1.57948e+06	1.35825e+06
453.288	7.8114	Sambutoxin		1.02531e+06	922851
458.175	14.9021	Asn/Asn/Asp/Pro	Peptide	72799.8	79908.9
458.183	9.75877	Asp/Met/Pro/Pro	Peptide	115439	53136.4
459.159	14.3706	Asn/Asp/Asp/Pro	Peptide	182292	174380
460.264	14.1937	Ala/Lys/Lys/Asp	Peptide	341753	519141
461.187	16.8297	Arg/Asp/Asp/Gly	Peptide	148658	91072.8
461.187	17.5777	Asn/Asn/Gln/Ser	Peptide	129564	110659
461.335	7.7989	Glucosylsphingosine	Lipid Metabolism	253949	219688
461.336	4.7092	Glucosylsphingosine	Lipid Metabolism	361784	320815
465.322	4.77545	LysoPE(18:1)	Lipid Metabolism	1.04418e+06	934333
465.322	7.80451	LysoPE(18:1)	Lipid Metabolism	292183	260899
466.312	3.75043	Cholesterol sulfate	Lipid Metabolism	1.2865e+06	1.20999e+06
468.156	15.0831	Dichamanetin	Lipid Metabolism	205183	289573
471.168	10.6594	2-amino-4-({1-[(carboxymethyl)-C-hydroxycarbonimidoyl]-2-[(2,3-dihydroxy-2-methyl-1-phenylpropyl)sulfanyl]ethyl}-C-hydroxycarbonimidoyl)butanoic acid		135189	140315
471.233	12.2495	Asn/Glu/Ile/Pro	Peptide	162904	162721
471.316	28.5988	Ala/Ile/Arg/Ile	Peptide	1.06824e+06	1.09525e+06
472.112	14.1717	CMP-N-trimethyl-2-aminoethylphosphonate	Lipid Metabolism	3.69761e+06	4.07178e+06
475.242	7.82406	Ala/Leu/Trp/Ser	Peptide	403752	1.56823e+06
477.285	7.81178	LysoPE(0:0/18:2)	Lipid Metabolism	246738	241522
477.286	4.70275	sn-glycero-3-phospho-N-(linoleoyl)ethanolamine		443956	380798
478.071	15.1946	4-Methoxyglucobrassicin		178599	176820
479.301	4.6799	LysoPE(0:0/18:1)	Lipid Metabolism	1.69349e+06	1.53228e+06
479.301	7.80373	PC(15:1)	Lipid Metabolism	2.14757e+06	1.77763e+06
479.302	7.80702	sn-glycero-3-phospho-N-(oleoyl)ethanolamine		984887	867382
479.302	4.67909	sn-glycero-3-phospho-N-(oleoyl)ethanolamine		987431	816290
479.337	7.80814	LysoPC(P-16:0)	Lipid Metabolism	633105	491139
479.338	4.70961	LysoPC(P-16:0)	Lipid Metabolism	990476	897984
480.127	15.0177	6-{3-[3-(3,4-dihydroxyphenyl)-3-oxopropyl]-6-hydroxy-2-methoxyphenoxy}-3,4,5-trihydroxyoxane-2-carboxylic acid		85840.4	110907
481.211	11.1002	Arg/Phe/Cys/Gly	Peptide	105880	107610
481.316	7.80831	LysoPC(15:0)	Lipid Metabolism	926222	897922
481.316	4.75194	LysoPE(0:0/18:0)	Lipid Metabolism	670673	615912
481.352	7.81142	1-hexadecyl-sn-glycero-3-phosphocholine	Lipid Metabolism	529800	448459
481.353	4.78404	1-octyl-2-octyl-sn-glycero-3-phosphocholine	Lipid Metabolism	766367	652510
482.172	14.9651	Melleolide D		422890	650865
483.236	9.49183	Caffeoylferuloylspermidine		0	177268
483.261	7.83045	PIP(16:0/22:4)	Lipid Metabolism	249057	203820
484.192	15.0827	Ala/Glu/Glu/His	Peptide	334329	465655
485.124	14.3512	Cys/Cys/Ser/Ser/Ser	Peptide	431565	505942
486.142	16.2962	Asp/Cys/Ser/Tyr	Peptide	73018	35524
486.142	13.7613	Asp/Cys/Ser/Tyr	Peptide	102649	67592.5
486.206	21.9632	Glucosylgalactosyl hydroxylysine		64341.8	61183.9
488.108	15.0989	Citicoline	Lipid Metabolism	534614	728249
488.259	13.2643	Asn/Leu/Lys/Asp	Peptide	49018.9	89097.5
489.163	13.9629	Cys/Gly/His/Ser/Ser	Peptide	120539	110921
489.243	13.767	Asp/Leu/Lys/Asp	Peptide	135366	139955
490.313	11.1976	3-O-alpha-L-rhamnopyranosyl-3-hydroxynonanoyl-3-hydroxydecanoic acid		143737	160227
492.044	17.5346	bathophenanthroline sulfonate		96654.6	122684
493.317	4.77339	PE(19:1/0:0)	Lipid Metabolism	328116	253320
493.353	4.67026	PE(P-20:0)	Lipid Metabolism	266732	247866
494.199	14.7541	Asn/Lys/Met/Cys	Peptide	66529.2	37675.7
495.332	7.80899	2-Palmitoylglycerophosphocholine	Lipid Metabolism	7.50613e+06	6677515
495.332	4.75683	PE(19:0)	Lipid Metabolism	1.30225e+07	1.0556e+07
496.999	17.5639	2'-Deoxy-5-hydroxymethylcytidine-5'-triphosphate	Nucleotide Metabolism	216306	293621
498.048	12.5701	Kaempferol 3-sulfate-7-alpha-arabinopyranoside	Lipid Metabolism	352024	279906
498.179	10.53	Ala/Met/Asp/Tyr	Peptide	7.87572e+06	7.76729e+06
498.18	10.1857	Ala/Met/Asp/Tyr	Peptide	2.30876e+06	2.47722e+06
498.18	9.72348	Asp/Met/Phe/Ser	Peptide	1.36819e+06	1.09202e+06
499.27	4.67951	LysoPE(0:0/20:5)	Lipid Metabolism	75497.8	62612.9
500.177	10.4748	Cys/Leu/Cys/Tyr	Peptide	835587	876648
501.243	16.1118	Glu/Glu/Lys/Pro	Peptide	35134	107929
501.285	7.80276	LysoPE(0:0/20:4)	Lipid Metabolism	1.69323e+06	1.26778e+06
501.285	4.65183	LysoPE(0:0/20:4)	Lipid Metabolism	1.57441e+06	1.27141e+06
501.286	7.8028	sn-glycero-3-phospho-N-(arachidonoyl)ethanolamine		673171	607908
501.286	4.65031	sn-glycero-3-phospho-N-(arachidonoyl)ethanolamine		802750	615376
506.996	16.055	Adenosine triphosphate	Energy Metabolism	4.0648e+06	1.98977e+06
507.369	4.71484	LysoPC(P-18:0)	Lipid Metabolism	343218	285469
509.348	7.79319	LysoPC(17:0)	Lipid Metabolism	724456	773168
509.348	4.71491	PC methyl(16:0)	Lipid Metabolism	1010621	1002576
509.385	4.70225	LysoPC(O-18:0)	Lipid Metabolism	372451	423581
510.156	16.4167	Ala/Cys/Cys/Asn/Thr	Peptide	66971.9	72147.9
512.116	14.3314	6-{4-[-3-[(3-carboxy-5,6-dihydroxycyclohex-3-en-1-yl)oxy]-3-oxoprop-1-en-1-yl]-2-hydroxyphenoxy}-3,4,5-trihydroxyoxane-2-carboxylic acid		305303	111050
514.217	11.1769	Asp/Phe/Pro/His	Peptide	0	137810
515.046	16.0273	3-(ADP)-glycerate		45314.5	21267.4
515.156	9.55798	2-amino-4-({1-[(carboxymethyl)-C-hydroxycarbonimidoyl]-2-{[2-hydroxy-1-(4-hydroxy-3-methoxyphenyl)-3-oxobutyl]sulfanyl}ethyl}-C-hydroxycarbonimidoyl)butanoic acid		2.0631e+06	1.50415e+06
517.317	4.77416	LysoPC(18:3)	Lipid Metabolism	435440	362702
519.332	4.73082	LysoPC(18:2)	Lipid Metabolism	2.1487e+06	1.50047e+06
521.195	16.8309	Ala/Met/Trp/Asp	Peptide	74665.2	80282.9
521.348	7.80437	2-Oleoylglycerophosphocholine	Lipid Metabolism	2.3085e+06	1.97427e+06
521.348	4.69918	LysoPC(18:1)	Lipid Metabolism_Glycerophospholipids [GP]	4.37885e+06	3.57608e+06
522.14	12.937	Cys/Asp/Asp/Gly/Asn	Peptide	60897.1	60474.9
523.292	4.26699	1-Oleoylglycerophosphoserine	Lipid Metabolism	146459	142591
523.364	7.80242	2-acetyl-1-alkyl-sn-glycero-3-phosphocholine	Lipid Metabolism	7762561	8.33755e+06
523.364	4.65854	LysoPC(18:0)	Lipid Metabolism	1.26912e+07	1.21272e+07
524.062	16.6788	{2-[5,7-dihydroxy-2-(4-hydroxy-3-methoxyphenyl)-4-oxo-4H-chromen-6-yl]-4-hydroxy-6-methyl-5-oxooxan-3-yl}oxidanesulfonic acid		61707.6	25810.1
525.285	4.60008	LysoPE(0:0/22:6)	Lipid Metabolism	432180	339053
525.307	4.24557	1-Stearoylglycerophosphoserine	Lipid Metabolism	556275	315281
526.152	16.8495	Cys/Cys/Asn/Ser/Thr	Peptide	59125.8	62373.9
526.246	14.6145	Ile/Met/Thr/Tyr	Peptide	103671	80701.5
527.116	13.9152	Ala/Cys/Cys/Cys/Glu	Peptide	333038	286170
527.301	4.57955	LysoPE(0:0/22:5)	Lipid Metabolism	364133	252849
529.212	14.9126	Ala/Asp/His/Ser/Thr	Peptide	52745.1	78194.5
529.274	7.84446	Ala/Glu/Ile/Pro/Thr	Peptide	383881	335672
529.275	4.84725	Ala/Glu/Ile/Pro/Thr	Peptide	325503	267442
529.317	4.55904	LysoPE(0:0/22:4)	Lipid Metabolism	344141	268862
530.196	14.3686	Ala/Asp/Asp/Asn/Pro	Peptide	186489	177150
534.156	17.1384	Asp/Asp/Asp/Gly/Asn	Peptide	68644.6	49479.9
535.158	3.88779	Cys/Asp/Asp/Pro/Ser	Peptide	1.7436e+07	14050000
536.159	3.88895	1,4-beta-D-Glucan	Carbohydrate Metabolism	8.8775e+06	6.95295e+06
537.076	16.1624	CDP-ribitol	Carbohydrate Metabolism	72487.2	63795.7
537.512	3.91799	N-(eicosanoyl)-tetradecasphing-4-enine	Lipid Metabolism_Sphingolipids [SP]	749742	853471
540.155	3.90696	N,N'-Bis(g-glutamyl)-3,3'-(1,2-propylenedithio)dialanine		233027	204953
541.06	13.9564	Cyclic ADP-ribose		966987	1.03085e+06
541.339	4.72007	1-(2-methoxy-octadecanyl)-sn-glycero-3-phosphoserine		214942	194010
541.339	7.78754	1-(2-methoxy-octadecanyl)-sn-glycero-3-phosphoserine		130481	104379
545.276	4.23327	1-(eicosatetraenoyl)-sn-glycero-3-phosphoserine	Lipid Metabolism	307591	226770
545.276	7.81292	1-(eicosatetraenoyl)-sn-glycero-3-phosphoserine	Lipid Metabolism	155680	110309
545.347	4.65185	LysoPC(20:3)	Lipid Metabolism	525617	426895
545.349	3.91713	LysoPC(20:3)	Lipid Metabolism	249191	156207
548.228	14.6106	Phe/Gly/Tyr/Tyr	Peptide	87213.9	87084.9
550.152	16.8318	Cys/Cys/Asp/Asn/Pro	Peptide	156439	110209
550.311	16.052	Ile/Lys/Gln/Tyr	Peptide	419888	470103
550.312	15.499	Gln/Leu/Lys/Tyr	Peptide	404752	407868
551.395	4.55817	LysoPC(20:0/0:0)	Lipid Metabolism	355411	316808
552.257	13.8579	Cys/Lys/Thr/Thr/Thr	Peptide	0	196795
558.117	9.28409	Deoxyrubroskyrin		407673	430882
559.072	14.4071	Adenosine diphosphate ribose	Nucleotide Metabolism	59690.3	58441.1
562.243	14.5231	Ala/Phe/Tyr/Tyr	Peptide	105489	82471
566.055	15.8493	Uridine diphosphate glucose	Carbohydrate Metabolism	3.45043e+06	3.80576e+06
567.177	15.2492	Cys/Cys/Asn/Gln/Thr	Peptide	119001	77415.2
569.37	4.67746	1-(2-methoxy-eicosanyl)-sn-glycero-3-phosphoserine		93644.4	81421.5
573.087	12.3766	GDP-3,6-dideoxy-D-galactose		1.14026e+06	1.01833e+06
574.495	3.753	Montecristin		155929	180214
575.093	9.26297	dTDP-2,3,6-trideoxy-3-C-methyl-3-nitro--L-arabino-hexopyranose		104193	116924
580.035	18.3942	Uridine diphosphate glucuronic acid	Carbohydrate Metabolism	93757.4	48060.8
580.289	9.53439	Lys/Met/Thr/Thr/Thr	Peptide	0	101375
581.169	12.9364	2-amino-4-({1-[(carboxymethyl)-C-hydroxycarbonimidoyl]-2-{[1-(3,5-dihydroxyphenyl)-2-hydroxy-2-(3-hydroxy-4-methoxyphenyl)ethyl]sulfanyl}ethyl}-C-hydroxycarbonimidoyl)butanoic acid		88068.3	51207.2
584.39	15.165	Ile/Ile/Ile/Ile/Asn	Peptide	396481	430708
585.374	14.6299	Asp/Ile/Ile/Ile/Ile	Peptide	853709	722063
589.083	17.0621	ADP-Mannose	Carbohydrate Metabolism	192006	219549
590.065	9.17637	IDP-D-mannose		197475	209542
598.405	14.9702	Ile/Ile/Ile/Ile/Gln	Peptide	488653	618743
599.276	15.2137	His/Asn/Arg/Ser/Ser	Peptide	92092.3	138979
599.39	14.3214	Glu/Ile/Ile/Ile/Ile	Peptide	1.5588e+06	1.59013e+06
600.328	4.30723	1-Stearoylglycerophosphoinositol	Lipid Metabolism	75888.9	78345.7
601.388	11.5438	Ile/Ile/Ile/Ile/Met	Peptide	80904.5	86611.7
602.526	3.74849	1-(hexadecanoyl)-2-(8-[3]-ladderane-octanyl)-sn-glycerol	Lipid Metabolism	306153	322888
604.011	15.8711	Gallagic acid		147164	175640
605.077	17.6807	Guanosine diphosphate mannose	Carbohydrate Metabolism	550944	365521
605.333	4.65225	PKOOA-PE		151438	103677
607.082	14.6817	Uridine diphosphate-N-acetylglucosamine	Carbohydrate Metabolism	1.17649e+06	1.48834e+06
610.095	14.7906	Epigallocatechin 3,5-di-gallate	Lipid Metabolism	241546	184860
610.325	10.1241	His/Lys/Met/Pro/Val	Peptide	296482	304176
612.152	17.0031	Oxidized glutathione	Amino Acid Metabolism	3.80667e+07	20075000
614.172	8.53629	7,8-H2pterin-6-ylmethyl-l-(4-aminophenyl)-1-deoxy-5-[1- -D- ribofuranosyl 5-phosphate]-D-ribitol		193124	173364
614.221	10.4578	Cys/Cys/Asp/Phe/Lys	Peptide	360698	237470
614.294	28.5887	His/His/Pro/Pro/Gln	Peptide	349817	369776
615.153	17.0049	Cys/Cys/Glu/Met/Met	Peptide	470062	249719
619.59	3.99784	Cer(d18:1/22:1)	Lipid Metabolism	392367	407964
621.028	17.5682	2'-phospho-cyclic ADP-ribose		165897	94925.1
622.288	4.45017	Cys/Phe/Pro/Arg/Thr	Peptide	757502	502001
623.344	4.01287	PHODiA-PE		231115	136354
625.215	10.2588	Cys/Cys/Met/Asn/Arg	Peptide	296954	289999
630.384	11.5757	Ala/Lys/Lys/Val/Trp	Peptide	215920	175627
636.15	14.0051	Kaempferol 3-(4''-acetyl-6''-p-coumarylglucoside)	Lipid Metabolism	1.34197e+06	1.25904e+06
638.147	14.0336	Kaempferide 5-glucoside-7-glucuronide	Lipid Metabolism	383367	361093
647.621	3.90683	Cer(d18:1/24:1)	Lipid Metabolism	1.85959e+06	2.48696e+06
648.291	15.7087	Ala/Glu/Phe/Pro/Trp	Peptide	83573.2	91098.6
648.395	13.1453	Phe/Ile/Lys/Lys/Asn	Peptide	123381	158529
648.473	3.79916	PA(14:0/18:0)	Lipid Metabolism_Glycerophospholipids [GP]	217442	269255
650.223	14.9605	Asp/Glu/Glu/Met/Gln	Peptide	60510	117681
652.25	28.5491	Ala/Asp/Asp/Phe/Trp	Peptide	314344	331118
655.421	7.82318	Ganglioside GA1 (d18:1/22:0)	Lipid Metabolism_Lipid Metabolism	526778	591919
657.315	14.6111	Phe/Phe/Phe/Pro/Thr	Peptide	204686	183537
662.446	3.86443	Phe/Ile/Lys/Lys/Lys	Peptide	340763	385603
663.109	13.9508	NAD	Energy Metabolism	1.86444e+07	20350000
663.11	13.9603	Fenugreekine		6.46973e+06	6.96981e+06
666.195	14.9588	Cys/Asp/Asp/Glu/Trp	Peptide	48836.1	85510.4
668.43	4.80197	Ganglioside GA1 (d18:1/24:1)	Lipid Metabolism_Lipid Metabolism	124770	169447
671.331	14.5355	Phe/Phe/Pro/Val/Tyr	Peptide	158563	96899.8
672.474	3.77135	PA(14:1/20:1)	Lipid Metabolism	1.32571e+06	1.52737e+06
674.489	3.76657	PA(14:0/20:1)	Lipid Metabolism	1.88719e+06	2.35678e+06
674.536	7.75938	N-(heneicosanoyl)-tetradecasphing-4-enine-1-phosphoethanolamine	Sphingolipids [SP]	3.75291e+06	3.0173e+06
674.536	4.37911	SM(d18:1/14:0)	Lipid Metabolism	4.98637e+06	3.22922e+06
679.104	12.7981	nicotinamide guanine dinucleotide		70368.4	39261.7
688.552	7.75397	N-(docosanoyl)-tetradecasphing-4-enine-1-phosphoethanolamine	Sphingolipids [SP]	2.37148e+06	2.313e+06
688.552	4.37183	N-(docosanoyl)-tetradecasphing-4-enine-1-phosphoethanolamine	Sphingolipids [SP]	2.88235e+06	2.43727e+06
689.499	3.75872	PC(14:1/15:0)	Lipid Metabolism	802752	1.02807e+06
690.226	13.8906	Cys/Asp/His/Met/Trp	Peptide	166561	188190
691.515	3.74836	PC(17:0/12:0)	Lipid Metabolism_Glycerophospholipids [GP]	1.01717e+06	1.36979e+06
696.291	14.5985	Asp/Glu/Phe/Met/Arg	Peptide	101401	71256.2
698.488	3.76339	PA(14:1/22:2)	Lipid Metabolism	673438	800134
700.504	3.74715	PA(16:1/20:1)	Lipid Metabolism	842687	980075
700.552	7.75041	N-(tricosanoyl)-tetradecasphingadienine-1-phosphoethanolamine	Sphingolipids [SP]	2.64773e+06	2.61324e+06
700.552	4.33043	N-(tricosanoyl)-tetradecasphingadienine-1-phosphoethanolamine	Sphingolipids [SP]	4.79993e+06	4559773
701.537	4.05152	PE(16:0/P-18:1)	Lipid Metabolism	750683	837064
701.538	4.69638	PE(16:0/P-18:1)	Lipid Metabolism	117205	142225
702.52	3.75884	PA(14:1/22:0)	Lipid Metabolism	649990	763610
702.567	7.74289	SM(d18:1/16:0)	Lipid Metabolism	2.80667e+07	30325000
702.568	4.34837	N-(tricosanoyl)-tetradecasphing-4-enine-1-phosphoethanolamine	Sphingolipids [SP]	3.30778e+07	33300000
702.568	5.37019	N-(tricosanoyl)-tetradecasphing-4-enine-1-phosphoethanolamine	Sphingolipids [SP]	5.8136e+06	6.08889e+06
705.53	4.15987	PC(14:0/16:0)	Lipid Metabolism_Glycerophospholipids [GP]	1.68143e+06	1.14748e+06
708.509	3.72949	PA(O-38:5)	Lipid Metabolism	205990	323238
712.367	14.8191	Digitalin		119672	50698.7
713.499	3.80381	PE(14:0/20:3)	Lipid Metabolism	614817	866630
714.296	9.7963	Asn/Gln/Gln/Tyr/Tyr	Peptide	3.11875e+06	1.19665e+06
714.567	7.72615	SM C16:1		112388	97276.1
715.516	4.02138	PE(16:0(9Cp)/16:0(9Cp))	Lipid Metabolism	745797	744974
716.295	10.3573	Cys/Glu/Phe/Arg/Tyr	Peptide	3.90469e+06	2.45711e+06
716.583	4.32453	N-(tetracosanoyl)-tetradecasphing-4-enine-1-phosphoethanolamine	Sphingolipids [SP]	1.03277e+06	986944
716.583	7.73531	N-(tetracosanoyl)-tetradecasphing-4-enine-1-phosphoethanolamine	Sphingolipids [SP]	847199	821271
717.529	4.03647	PE(14:0/20:1)	Lipid Metabolism_Glycerophospholipids [GP]	4.37473e+06	4.4878e+06
717.529	4.87946	PC(13:0/18:1)	Lipid Metabolism_Glycerophospholipids [GP]	1.55202e+06	1.74359e+06
717.531	6.65055	PE(14:0/20:1)	Lipid Metabolism_Glycerophospholipids [GP]	310720	312554
717.531	5.5653	PE(18:1/16:0)	Lipid Metabolism	522563	532435
720.474	3.74656	PA(16:0/22:6)	Lipid Metabolism	265613	359368
722.489	3.73973	PA(16:1/22:4)	Lipid Metabolism	457194	558973
723.52	3.97818	PE(18:3/P-18:1)	Lipid Metabolism	2.73236e+06	2.81951e+06
724.276	16.5187	Asp/His/His/Met/Trp	Peptide	114369	92831.7
727.553	4.0685	PE(18:1/P-18:1)	Lipid Metabolism	743102	778199
728.583	7.72327	SM(d18:1/18:1)	Lipid Metabolism	1.25638e+06	1.30831e+06
728.584	4.31119	SM(d18:2/18:0)	Lipid Metabolism	2.71493e+06	2.98201e+06
729.568	3.99511	PE(18:1/P-18:0)	Lipid Metabolism	174772	184278
730.598	7.72379	SM(d18:1/18:0)	Lipid Metabolism	3.28251e+06	3.61418e+06
730.599	4.33396	SM(d16:1/20:0)	Lipid Metabolism	4.07737e+06	4.42744e+06
731.546	4.12212	PC(12:0/20:1)	Lipid Metabolism_Glycerophospholipids [GP]	4.59088e+06	4.20572e+06
733.562	4.62448	PC(16:0/16:0)	Lipid Metabolism_Glycerophospholipids [GP]	2.99491e+06	4.20871e+06
733.562	5.59918	PE(15:0/20:0)	Lipid Metabolism_Glycerophospholipids [GP]	1.70816e+06	1.79087e+06
733.562	4.13892	PE(15:0/20:0)	Lipid Metabolism_Glycerophospholipids [GP]	1.21937e+07	12575000
734.429	3.66283	Phe/Arg/Arg/Arg/Thr	Peptide	74134.1	98499.3
736.278	10.1034	Cys/Gly/Trp/Trp/Trp	Peptide	4.77899e+06	8.50719e+06
739.514	4.83259	PE(16:1/20:3)	Lipid Metabolism	1.20257e+06	1.33475e+06
739.514	3.97748	PC(15:0/18:4)	Lipid Metabolism	5.14337e+06	5.54188e+06
741.529	3.99483	PE(14:1/22:2)	Lipid Metabolism	1.02814e+06	1.00076e+06
743.075	16.3706	NADP	Energy Metabolism	1.1241e+06	770024
743.341	15.4882	Pro/Gln/Gln/Trp/Trp	Peptide	134074	71133.2
743.547	3.98222	PE(18:0(11Cp)/16:0(9Cp))	Lipid Metabolism_Glycerophospholipids [GP]	932572	931883
743.547	4.57128	PC(13:0/20:2)	Lipid Metabolism	359117	367488
744.614	7.69125	N-(hexacosanoyl)-tetradecasphing-4-enine-1-phosphoethanolamine	Sphingolipids [SP]	144596	144854
745.265	10.3144	Cys/Asp/His/Trp/Trp	Peptide	612445	578207
745.561	4.00214	PE(14:1/22:0)	Lipid Metabolism	435988	445145
747.519	3.94648	PE(P-18:1/20:5)	Lipid Metabolism	1.47107e+06	1.48899e+06
747.577	4.13533	PE(14:0/22:0)	Lipid Metabolism_Glycerophospholipids [GP]	779802	742715
748.525	3.70509	PG(16:0/18:1)	Lipid Metabolism_Glycerophospholipids [GP]	890971	775358
749.536	3.95261	PE(20:4/P-18:1)	Lipid Metabolism	4.13195e+06	4.4132e+06
751.552	3.95957	PE(O-18:1/20:4)	Lipid Metabolism	6457353	6.29382e+06
751.552	5.39916	PE(P-18:1/20:3)	Lipid Metabolism	607550	635116
753.566	3.95367	PE(P-18:0/20:3)	Lipid Metabolism	1.29581e+06	1.29642e+06
756.614	7.68763	SM(d18:1/20:1)	Lipid Metabolism	364259	348713
756.615	4.28306	SM(d18:1/20:1)	Lipid Metabolism	853245	770878
757.562	4.44319	PE(15:0/22:2)	Lipid Metabolism	5.62556e+07	2.24054e+07
757.562	5.61236	PC(14:0/20:2)	Lipid Metabolism_Glycerophospholipids [GP]	5.14764e+06	4.28277e+06
757.562	4.10082	PC(14:0/20:2)	Lipid Metabolism_Glycerophospholipids [GP]	5.71889e+07	50750000
758.629	7.67665	SM(d16:1/22:0)	Lipid Metabolism	691506	714440
759.577	4.10514	PE(37:1)	Lipid Metabolism	7.46222e+07	72675000
759.577	4.74039	PC(14:0/20:1)	Lipid Metabolism_Glycerophospholipids [GP]	1.66666e+07	20600000
759.577	5.71773	PE(15:0/22:1)	Lipid Metabolism	7.26245e+06	6.6302e+06
759.577	5.2153	PE(22:1/15:0)	Lipid Metabolism	1.04578e+07	9.08146e+06
760.43	12.1093	PGP(a-13:0/i-16:0)		73187.1	68574.3
761.521	3.789	PS(16:0/18:1)	Lipid Metabolism	1.33337e+06	1.21385e+06
762.46	3.68884	Ile/Arg/Arg/Arg/Tyr	Peptide	133427	159157
763.514	3.95765	PC(35:6)	Lipid Metabolism	2.88372e+06	3.01666e+06
763.534	3.76613	PS(16:0/18:0)	Lipid Metabolism	687036	725384
765.53	3.9445	PC(15:0/20:5)	Lipid Metabolism	2.04594e+06	2.27757e+06
766.586	4.37818	PA(O-42:4)	Lipid Metabolism	545986	535736
767.545	3.95089	PE(16:0/22:4)	Lipid Metabolism_Glycerophospholipids [GP]	1.77361e+06	1.78926e+06
767.584	7.73161	PC(P-16:0/20:3)	Lipid Metabolism_Glycerophospholipids [GP]	132350	159612
772.525	3.66301	PG(16:0/20:3)	Lipid Metabolism	319385	333900
772.645	7.64422	SM(d17:1/22:0)	Lipid Metabolism	160909	129933
773.535	3.90816	PE(P-18:1/22:6)	Lipid Metabolism	355208	361304
773.593	4.09883	PE(16:0/22:1)	Lipid Metabolism	2.07929e+06	1.68819e+06
774.541	3.68672	PG(18:0/18:2)	Lipid Metabolism	726311	658961
775.551	3.90812	PE(P-18:1/22:5)	Lipid Metabolism	1.04522e+06	947411
776.555	3.79536	PG(18:0/18:1)	Lipid Metabolism	710573	718908
777.567	3.93141	PE(P-40:5)	Lipid Metabolism	2.51208e+06	2.30579e+06
778.461	28.5911	PI(12:0/18:2)	Lipid Metabolism	885953	881246
778.573	3.96499	PG(18:0/18:0)	Lipid Metabolism	448318	409384
779.583	3.94881	PE(P-18:0/22:4)	Lipid Metabolism	567616	626103
781.562	4.06197	PC(14:0/22:4)	Lipid Metabolism_Glycerophospholipids [GP]	2.28667e+07	22800000
782.63	7.66221	SM(d18:2/22:1)	Lipid Metabolism	91331.9	92590.3
783.506	3.77658	PS(16:0/20:4)	Lipid Metabolism	716859	723267
783.577	5.91771	PC(14:1/22:2)	Lipid Metabolism_Glycerophospholipids [GP]	1.40576e+06	1.31255e+06
783.577	4.57207	PC(14:1/22:2)	Lipid Metabolism_Glycerophospholipids [GP]	3.77655e+06	7.02533e+06
783.577	5.57854	PE(39:3)	Lipid Metabolism	1.83076e+06	1.47177e+06
784.646	7.64764	SM(d18:2/22:0)	Lipid Metabolism	1.08974e+06	959418
784.646	4.79705	SM(d18:2/22:0)	Lipid Metabolism	1.33135e+06	969947
784.647	4.28687	SM(d18:2/22:0)	Lipid Metabolism	2.56796e+06	1.87313e+06
784.647	5.39621	SM(d18:2/22:0)	Lipid Metabolism	759832	613724
785.521	3.77487	PS(16:0/20:3)	Lipid Metabolism	659850	701019
785.592	4.68339	PE(39:2)	Lipid Metabolism	8.5094e+06	8.64964e+06
785.592	4.06011	PC(18:1/18:1)	Lipid Metabolism_Glycerophospholipids [GP]	2.77111e+07	25525000
786.661	7.62264	SM(d16:1/24:0)	Lipid Metabolism	2.65661e+06	2.95625e+06
786.662	4.38468	SM(d18:0/22:1)	Lipid Metabolism	2.92397e+06	2.61783e+06
787.537	3.77485	PS(18:0/18:2)	Lipid Metabolism	2.87318e+06	2.80184e+06
788.385	14.6119	Dulcoside A		127264	110585
789.552	3.784	PS(18:0/18:1)	Lipid Metabolism	6.04659e+06	6.57169e+06
793.598	4.02734	PC(P-16:0/22:4)	Lipid Metabolism	1.26086e+06	1.23027e+06
796.526	3.68034	PG(16:0/22:5)	Lipid Metabolism	231201	222272
798.661	4.30515	SM(d17:1/24:1)	Lipid Metabolism	834596	655279
798.661	7.62026	SM(d17:1/24:1)	Lipid Metabolism	382598	350284
805.562	4.03241	PC(16:0/22:6)	Lipid Metabolism_Glycerophospholipids [GP]	8.03237e+06	6.27409e+06
807.506	3.75892	PS(20:3/18:3)	Lipid Metabolism	581380	536989
807.577	4.02463	PC(16:0/22:5)	Lipid Metabolism_Glycerophospholipids [GP]	9.10448e+06	7.68584e+06
808.511	3.77143	PI(16:0/16:1)	Lipid Metabolism	281448	256340
809.521	3.75518	PS(18:1/20:4)	Lipid Metabolism	4.48827e+06	4.22343e+06
809.592	4.77095	PE(41:4)	Lipid Metabolism	2.47237e+06	2.53922e+06
809.593	4.01799	PC(16:0/22:4)	Lipid Metabolism_Glycerophospholipids [GP]	13751961	12650000
810.661	7.61593	SM(d42:3)	Lipid Metabolism	1.32854e+06	1.53073e+06
810.662	5.36821	SM(d42:3)	Lipid Metabolism	1.15302e+06	988634
810.662	4.26485	SM(d42:3)	Lipid Metabolism	4.2839e+06	4.00565e+06
811.537	3.75861	PS(18:0/20:4)	Lipid Metabolism	40700000	40675000
811.537	5.1877	PS(18:0/20:4)	Lipid Metabolism	475154	410920
812.677	7.58124	SM(d18:2/24:0)	Lipid Metabolism	7.98322e+06	9.92396e+06
812.677	5.3467	SM(d18:2/24:0)	Lipid Metabolism	6.04522e+06	7.01593e+06
812.677	4.72479	SM(d18:2/24:0)	Lipid Metabolism	1.07373e+07	6.9871e+06
812.677	4.29206	SM(d18:2/24:0)	Lipid Metabolism	1.47917e+07	15425000
814.48	7.81626	PG(18:4/22:6)	Lipid Metabolism	329852	324543
814.691	7.60931	SM(d18:1/24:0)	Lipid Metabolism	4.2385e+06	5.88563e+06
819.563	5.57987	DGCC(20:5/20:5)		469814	409172
819.563	4.72759	DGCC(20:5/20:5)		916928	778633
819.563	4.14192	DGCC(20:5/20:5)		3.37015e+06	2.86352e+06
824.576	14.9698	PI(O-34:0)	Lipid Metabolism	221018	289444
825.554	3.74934	PS(39:4)	Lipid Metabolism	620587	774324
826.693	7.57528	SM(d18:2/25:0)	Lipid Metabolism	162715	170623
828.709	7.54189	N-(pentacosanoyl)-sphing-4-enine-1-phosphocholine	Lipid Metabolism	147691	133955
830.806	26.8909	Co-[-(2-methyladenin-9-yl)]-Co-adenosylcobamide 5'-phosphate		442613	400008
831.506	3.75646	PS(18:2/22:6)	Lipid Metabolism	308187	305141
831.577	4.02156	PC(18:1/22:6)	Lipid Metabolism_Glycerophospholipids [GP]	622981	582214
833.593	3.99992	PC(18:0/22:6)	Lipid Metabolism_Glycerophospholipids [GP]	2.98405e+06	2.60436e+06
835.608	4.00798	PC(18:0/22:5)	Lipid Metabolism_Glycerophospholipids [GP]	1.80668e+06	1.70433e+06
837.551	3.74969	PC(MonoMe(11,3)/MonoMe(11,3))		9.87855e+06	1.02299e+07
837.622	4.00255	PE(43:4)	Lipid Metabolism	512243	512913
839.566	3.75641	PS(18:0/22:4)	Lipid Metabolism	4.92397e+06	5.00194e+06
842.721	7.5961	SM(d18:1/26:0)	Lipid Metabolism	189121	220703
855.505	3.72397	PS(20:4/22:6)	Lipid Metabolism	460296	465345
858.526	3.77611	PI(16:0/20:4)	Lipid Metabolism	573183	683533
861.618	7.76937	Galabiosylceramide (d18:1/16:0)	Lipid Metabolism	364559	453237
862.557	3.78328	PI(16:0/20:2)	Lipid Metabolism	477492	488461
864.573	3.7913	PI(14:0/22:1)	Lipid Metabolism	684039	749450
869.302	18.0979	1,3-alpha-D-Mannosyl-(1,2-N-acetyl-alpha-D-glucosaminyl)-1,2-alpha- D-mannosyl-1,2-alpha-D-mannosyl-D-mannose		71340.1	50150.3
869.303	17.39	1,3-alpha-D-Mannosyl-(1,2-N-acetyl-alpha-D-glucosaminyl)-1,2-alpha- D-mannosyl-1,2-alpha-D-mannosyl-D-mannose		57081.3	46376
884.543	3.76445	PI(18:1/20:4)	Lipid Metabolism	330101	342155
886.558	3.76703	PI(16:0/22:4)	Lipid Metabolism	1.82544e+06	2.13746e+06
1023.67	7.85334	Trihexosylceramide (d18:1/16:0)	Lipid Metabolism	92719.9	87597.5
1031.36	18.7285	O-mannopyranosyl-alpha-1,3-[O-mannopyranosyl-alpha-1,3-(O-mannopyranosyl-alpha-1,6)-O-mannopyranosyl-alpha-1,6]-O-mannopyranosyl-beta-1,4-N-acetyl-D-glucosamine		52935.6	35672.3
1031.36	18.119	O-mannopyranosyl-alpha-1,3-[O-mannopyranosyl-alpha-1,3-(O-mannopyranosyl-alpha-1,6)-O-mannopyranosyl-alpha-1,6]-O-mannopyranosyl-beta-1,4-N-acetyl-D-glucosamine		96203.6	63218
1133.78	7.85771	Trihexosylceramide (d18:1/24:1)	Lipid Metabolism	130294	134974
